# Supplementary material for: On-water synthesis of 3,6-dihydro-2H-thiopyrans: Doyle–Kirmse reaction induced by blue-LEDs and ring-closing metathesis
Source: Royal Society of Chemistry journal article supplement (doi:10.1039/d4nj01668h), 2024-01-01

*Electronic Supporting Information*

**On-water synthesis of 3,6-dihydro-2*H*-thiopyrans: Doyle-Kirmse reaction induced by blue-LED and ring-closing metathesis**

Ramasamy Naveen and Sengodagounder Muthusamy\*

*School of Chemistry, Bharathidasan University*

*Tiruchirappalli – 620024, India. E-mail: muthu@bdu.ac.in*

**Table of Contents**

|                                                                                                                                                                |            |
|----------------------------------------------------------------------------------------------------------------------------------------------------------------|------------|
| <b>1.</b> General information .....                                                                                                                            | <b>S2</b>  |
| <b>2.</b> Important safety notes .....                                                                                                                         | <b>S2</b>  |
| <b>3.</b> General synthetic procedure .....                                                                                                                    | <b>S3</b>  |
| <b>3.1.</b> General procedure for the preparation of diazoacetates <b>2a-r,t</b> .....                                                                         | <b>S3</b>  |
| <b>3.2.</b> Preparation of diazoamide <b>2s</b> .....                                                                                                          | <b>S3</b>  |
| <b>4.</b> General procedure for the synthesis of dienes <b>3</b> <i>via</i> Doyle-Kirmse reaction.....                                                         | <b>S6</b>  |
| <b>5.</b> General procedure for the synthesis of thiopyrans <b>4</b> <i>via</i> ring-closing metathesis .....                                                  | <b>S16</b> |
| <b>6.</b> Synthetic procedure for the reduction of thiopyran <b>4b</b> .....                                                                                   | <b>S25</b> |
| <b>7.</b> Synthetic procedure for the oxidation of thiopyran <b>4f</b> .....                                                                                   | <b>S26</b> |
| <b>8.</b> Crystal data and structure refinement for compound <b>4b</b> .....                                                                                   | <b>S27</b> |
| <b>9.</b> Crystal data and structure refinement for compound <b>4u1</b> .....                                                                                  | <b>S32</b> |
| <b>10.</b> References .....                                                                                                                                    | <b>S37</b> |
| <b>11.</b> Copies of <sup>1</sup> H, <sup>13</sup> C, selected [DEPT-135, COSY, HSQC, HMBC, NOESY, and 1D-NOE] NMR spectra for compounds <b>S1,2-4,6</b> ..... | <b>S38</b> |

## 1. General information

The thin-layer chromatography was performed on silica plates and components were visualized by observation under iodine or UV light at 254 nm. Crude samples were purified by either column (silica gel, 100-200 mesh) or flash (silica gel, 230-400 mesh) chromatography. Unless otherwise stated, the Hexanes-EtOAc mixture was used as the eluent for the elution process. All air and moisture-sensitive reactions were carried out in oven-dried glassware under positive argon or nitrogen gas pressure using standard gas-tight syringes and septa with magnetic stirring. Grubbs' catalysts were purchased from commercial suppliers and used as provided.

Capillary melting point apparatus was used to determine the melting points which are uncorrected. Infrared spectra were recorded as neat (ATR) on a Bruker Alpha FT-IR spectrophotometer.  $^1\text{H}$ ,  $^{13}\text{C}\{^1\text{H}\}$ ,  $^{13}\text{C}\{^1\text{H}\}$  DEPT-135, [ $^1\text{H}$ ,  $^1\text{H}$ ] COSY, [ $^1\text{H}$ ,  $^{13}\text{C}\{^1\text{H}\}$ ] HSQC, [ $^1\text{H}$ ,  $^{13}\text{C}\{^1\text{H}\}$ ] HMBC, [ $^1\text{H}$ ,  $^1\text{H}$ ] NOESY, and 1D NOE NMR spectra were obtained on a 400 MHz Bruker Avance III 400 NMR spectrometer in the deuterated solvents indicated. Data are reported in the following order: Chemical shifts ( $\delta$ ) are reported in ppm from tetramethylsilane with the solvent resonance as the internal standard; multiplicities are indicated as s (singlet), d (doublet), t (triplet), q (quartet), td (triplet of doublets), m (multiplet), dd (doublet of doublets), ddd (doublet of doublet of doublets), ABq (AB quartet); coupling constants ( $J$ ) are in Hertz (Hz). High-resolution mass analyses were performed using the electrospray ionization (ESI) technique on a Thermo Exactive Orbitrap mass spectrometer. Optical rotations were determined on a JASCO P-2000 polarimeter and reported as follows:  $[\alpha]_{\text{D}}^{\text{T}}$  ( $c$  g/100 mL, solvent). The diastereomeric ratios ( $dr$ ) were determined from  $^1\text{H}$  NMR.

Two 470 nm LED lights are the light source used in the experiment, and the reaction vessel is between the two lights (the distance from the vessel to each light is about 10 cm). The irradiation intensity is ca.  $12\text{Wm}^{-2}$ . The irradiation vessels used in the reaction are all borosilicate glass vials (screw cap). No filter is used in all cases.

## 2. Important safety notes

*Handling of diazo compounds should only be done in a well-ventilated fume cupboard using an additional blast shield. No incidents occurred handling diazoalkanes during this work, yet the reader should be aware of the described diazo compounds' carcinogenicity and explosiveness. Generally, sulfur analogues are foul-smell in nature, so all the sulfur reactions are carried out inside the fume cupboard. Any reactions described in this work should not be performed without strict risk assessment and proper safety precautions.*

### 3. General synthetic procedure

#### 3.1. General procedure for the preparation of diazoacetates **2a-r,t**<sup>1</sup>

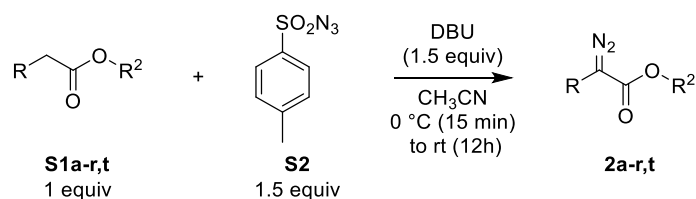

In an oven-dried round bottom flask, the appropriate precursors **S1a-r,t** (1 equiv) and *p*-toluenesulfonyl azide **S2** (1.5 equiv) were dissolved in anhydrous acetonitrile and cooled to 0 °C under argon atmosphere. 1,8-Diazabicyclo(5.4.0)undec-7-ene (1.5 equiv) was added at once to a stirred mixture. After 15 minutes, the ice bath was removed and stirred overnight under the argon atmosphere. The reaction was quenched with saturated NH<sub>4</sub>Cl and water. The layer was extracted with diethyl ether (3 x 20 mL) and the combined organics were washed with brine (3 x 10 mL), and dried over anhydrous NaSO<sub>4</sub>. The solvent was removed under reduced pressure and the residue was purified by column chromatography on neutral alumina, (Hexanes:EtOAc = 19:1) to give diazoacetates **2a-r,t** respectively (Table S1).

#### 3.2. Preparation of diazoamide **2s**

The diazoamide **2s** was prepared according to the literature.<sup>2</sup>

**Table S1.** Diazo compounds **2a-t**

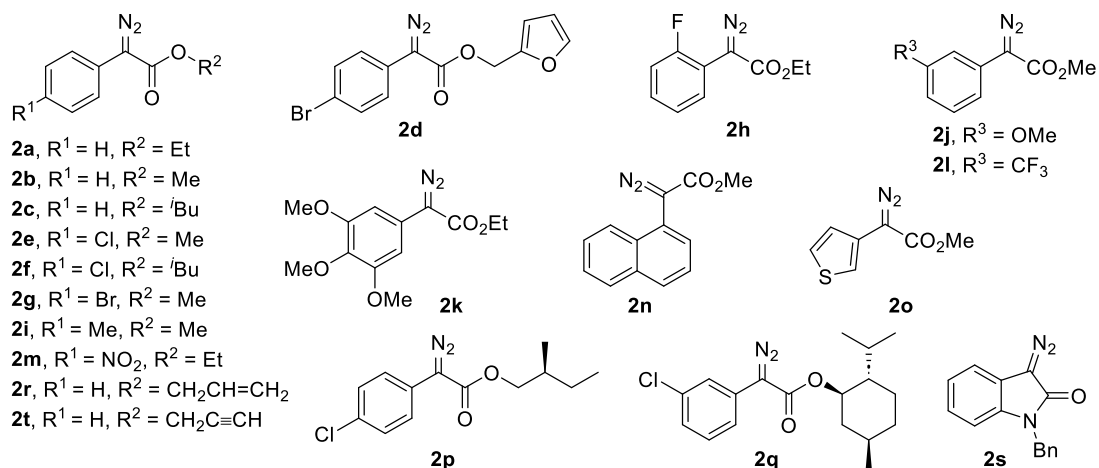

Diazo compounds: **2a-t** were prepared according to literature procedures. The observed characterization data (<sup>1</sup>H and <sup>13</sup>C NMR) are consistent with those previously reported.

The reports are (**2a,b,c,e,g,i,r**),<sup>1</sup> (**2d**),<sup>3</sup> (**2h,j**),<sup>4</sup> (**2k**),<sup>5</sup> (**2l**),<sup>6</sup> (**2m,n,o**),<sup>7</sup> (**2s**),<sup>2</sup> (**2t**).<sup>8</sup>

## 2-Methylpropyl (4-chlorophenyl)acetate (S1f)

(Spectra)

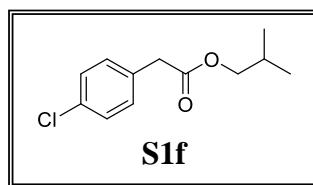

Yield 95%, colourless oil;  $R_f = 0.60$  (9:1 hexanes:ethyl acetate).

**IR** (neat):  $\nu_{\max} = 2963, 1732, 1493, 1247, 1147, 1092, 1008, 806 \text{ cm}^{-1}$ .

**$^1\text{H NMR}$  (400 MHz,  $\text{CDCl}_3$ )**  $\delta$  7.33-7.31 (m, 2H), 7.27-7.24 (m, 2H), 3.91 (d,  $J = 6.8 \text{ Hz}$ , 2H), 3.63 (s, 2H), 2.00-1.90 (m, 1H), 0.93 (d,  $J = 6.8 \text{ Hz}$ , 6H) ppm.

**$^{13}\text{C}\{^1\text{H}\}$  NMR (101 MHz,  $\text{CDCl}_3$ )**  $\delta$  171.3, 133.0, 132.7, 130.7, 128.7, 71.1, 40.8, 27.7, 19.0 ppm.

**HRMS (ESI)  $m/z$ :**  $[\text{M}+\text{H}]^+$  Calcd for  $[\text{C}_{12}\text{H}_{15}\text{ClO}_2+\text{H}]^+$  227.0839; Found: 227.0818.

## 2-Methylpropyl (4-chlorophenyl)(diazo)acetate (2f)

(Spectra)

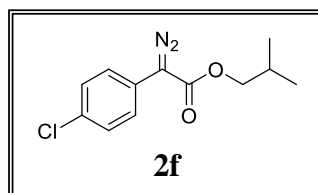

Yield 89%, yellowish oil;  $R_f = 0.62$  (9:1 hexanes:ethyl acetate).

**IR** (neat):  $\nu_{\max} = 2963, 2083, 1700, 1493, 1341, 1277, 1240, 1156, 1095, 1033, 821, 739 \text{ cm}^{-1}$ .

**$^1\text{H NMR}$  (400 MHz,  $\text{CDCl}_3$ )**  $\delta$  7.32-7.30 (m, 2H), 7.23-7.21 (m, 2H), 3.95 (d,  $J = 6.4 \text{ Hz}$ , 2H), 1.95-1.85 (m, 1H), 0.87 (d,  $J = 6.8 \text{ Hz}$ , 6H) ppm.

**$^{13}\text{C}\{^1\text{H}\}$  NMR (101 MHz,  $\text{CDCl}_3$ )**  $\delta$  164.8, 131.3, 129.1, 125.0, 124.3, 71.1, 63.1, 27.9, 19.0 ppm.

**HRMS (ESI)  $m/z$ :**  $[\text{M}+\text{H}]^+$  Calcd for  $[\text{C}_{12}\text{H}_{13}\text{ClN}_2\text{O}_2+\text{H}]^+$  253.0744; Found: 253.0728.

## (2S)-2-Methylbutyl (4-chlorophenyl)acetate (S1p)

(Spectra)

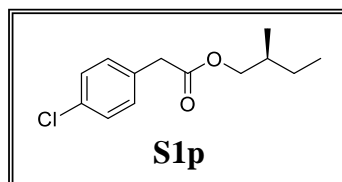

Yield 95%, colourless oil;  $R_f = 0.62$  (9:1 hexanes:ethyl acetate);  $[\alpha]_{\text{D}}^{26} = +3.7$  ( $c$  0.388,  $\text{CHCl}_3$ ).

**IR** (neat):  $\nu_{\max} = 2964, 1733, 1493, 1462, 1334, 1250, 1148, 1092, 1010, 807 \text{ cm}^{-1}$ .

**$^1\text{H NMR}$  (400 MHz,  $\text{CDCl}_3$ )**  $\delta$  7.20-7.17 (m, 2H), 7.13-7.11 (m, 2H), 3.91-3.86 (m, 1H), 3.81-3.77 (m, 1H), 3.49 (s, 2H), 1.63-1.55 (m, 1H), 1.34-1.23 (m, 1H), 1.11-1.00 (m, 1H), 0.80-0.76 (m, 6H) ppm.

$^{13}\text{C}\{^1\text{H}\}$  NMR (101 MHz,  $\text{CDCl}_3$ )  $\delta$  171.2, 133.0, 132.7, 130.7, 128.7, 69.6, 40.8, 34.1, 26.0, 16.4 11.2 ppm.

HRMS (ESI)  $m/z$ :  $[\text{M}+\text{H}]^+$  Calcd for  $[\text{C}_{13}\text{H}_{17}\text{ClO}_2+\text{H}]^+$  241.0995; Found: 241.1001.

**(2S)-2-Methylbutyl (4-chlorophenyl)(diazo)acetate (2p)**

(Spectra)

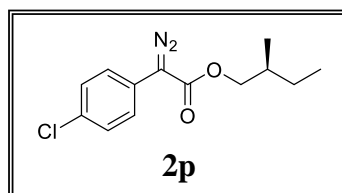

Yield 92%, yellowish oil;  $R_f = 0.70$  (9:1 hexanes:ethyl acetate);  $[\alpha]_{\text{D}}^{26} = +4.3$  ( $c$  0.393,  $\text{CHCl}_3$ ).

IR (neat):  $\nu_{\text{max}} = 2964, 2085, 1700, 1492, 1462, 1341, 1276, 1239, 1157, 1093, 1034, 1008, 825, 739 \text{ cm}^{-1}$ .

$^1\text{H}$  NMR (400 MHz,  $\text{CDCl}_3$ )  $\delta$  7.32-7.30 (m, 2H), 7.24-7.21 (m, 2H), 4.08-4.04 (m, 1H), 3.99-3.95 (m, 1H), 1.74-1.62 (m, 1H), 1.41-1.31 (m, 1H), 1.19-1.08 (m, 1H), 0.87-0.82 (m, 6H) ppm.

$^{13}\text{C}\{^1\text{H}\}$  NMR (101 MHz,  $\text{CDCl}_3$ )  $\delta$  164.9, 131.3, 129.1, 125.0, 124.3, 69.6, 63.1, 34.3, 26.0, 16.4 11.3 ppm.

HRMS (ESI)  $m/z$ :  $[\text{M}+\text{H}]^+$  Calcd for  $[\text{C}_{13}\text{H}_{15}\text{ClN}_2\text{O}_2+\text{H}]^+$  267.0900; Found: 267.0921.

**(1R,2S,5R)-5-Methyl-2-(propan-2-yl)cyclohexyl (3-chlorophenyl)acetate (S1q)**

(Spectra)

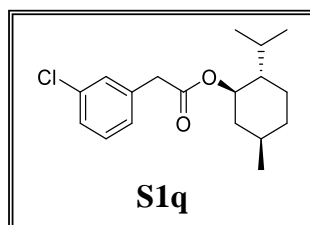

Yield 94%, colourless oil;  $R_f = 0.74$  (9:1 hexanes:ethyl acetate);  $[\alpha]_{\text{D}}^{27} = -40.5$  ( $c$  0.55,  $\text{CHCl}_3$ ).

IR (neat):  $\nu_{\text{max}} = 2954, 1730, 1457, 1252, 1149, 1090, 986, 768, 686 \text{ cm}^{-1}$ .

$^1\text{H}$  NMR (400 MHz,  $\text{CDCl}_3$ )  $\delta$  7.32 (s, 1H), 7.27-7.26 (m, 2H), 7.20-7.18 (m, 1H), 4.71 (td,  $J_1 = 10.8 \text{ Hz}$ ,  $J_2 = 4.4 \text{ Hz}$ , 1H), 3.60 (s, 2H), 2.04-1.99 (m, 1H), 1.82-1.75 (m, 1H), 1.74-1.66 (m, 2H), 1.57-1.45 (m, 1H), 1.44-1.36 (m, 1H), 1.12-0.88 (m, 9H), 0.73 (d,  $J = 6.8 \text{ Hz}$ , 3H) ppm.

$^{13}\text{C}\{^1\text{H}\}$  NMR (101 MHz,  $\text{CDCl}_3$ )  $\delta$  170.5, 136.3, 134.3, 129.7, 129.4, 127.4, 127.2, 75.0, 47.0, 41.4, 40.8, 34.2, 31.4, 26.2, 23.4, 22.0, 20.7, 16.2 ppm.

HRMS (ESI)  $m/z$ :  $[\text{M}+\text{H}]^+$  Calcd for  $[\text{C}_{18}\text{H}_{25}\text{ClO}_2+\text{H}]^+$  309.1621; Found: 309.1618.

**(1*R*,2*S*,5*R*)-5-Methyl-2-(propan-2-yl)cyclohexyl (3-chlorophenyl)(diazo)acetate (2q)**

(Spectra)

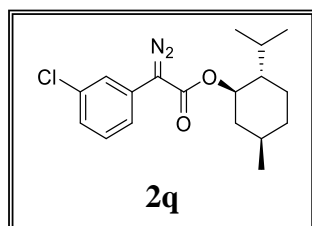

Yield 91%, yellowish oil;  $R_f = 0.76$  (9:1 hexanes:ethyl acetate);  $[\alpha]_D^{27} = -65.2$  ( $c$  0.42,  $\text{CHCl}_3$ ).

**IR** (neat):  $\nu_{\text{max}} = 2954, 2086, 1698, 1594, 1479, 1343, 1281, 1241, 1163, 1031, 778, 736 \text{ cm}^{-1}$ .

**$^1\text{H}$  NMR (400 MHz,  $\text{CDCl}_3$ )**  $\delta$  7.62-7.61 (m, 1H), 7.38-7.30 (m, 2H), 7.18-7.16 (m, 1H), 4.91 (td,  $J_1 = 10.8 \text{ Hz}$ ,  $J_2 = 4.4 \text{ Hz}$ , 1H), 2.17-2.12 (m, 1H), 1.98-1.91 (m, 1H), 1.78-1.73 (m, 2H), 1.62-1.45 (m, 2H), 1.20-1.06 (m, 2H), 0.98-0.95 (m, 7H), 0.85 (d,  $J = 6.8 \text{ Hz}$ , 3H) ppm.

**$^{13}\text{C}\{^1\text{H}\}$  NMR (101 MHz,  $\text{CDCl}_3$ )**  $\delta$  164.3, 135.0, 130.0, 128.1, 125.6, 123.7, 121.5, 75.4, 63.3, 47.1, 41.3, 34.2, 31.5, 26.6, 23.7, 22.0, 20.7, 16.6 ppm.

**HRMS (ESI)  $m/z$ :**  $[\text{M}+\text{H}]^+$  Calcd for  $[\text{C}_{18}\text{H}_{23}\text{ClN}_2\text{O}_2+\text{H}]^+$  335.1526; Found: 335.1519.

#### 4. General procedure for the synthesis of dienes **3** via Doyle-Kirmse reaction

The allyl sulfide (purchased from a commercial supplier and used as such) **1** (1.5 equiv) and a solution of diazo compounds **2** (0.5 mmol) in deionized  $\text{H}_2\text{O}$  (2 mL) were taken in a 5 mL screw cap vial. Then it was irradiated under 12W blue LEDs. The colour observed from pale yellowish/orange to colourless was an indication for the completion of the reaction. After the completion of reaction, the mixture was transferred to the separating funnel, 10 mL of  $\text{CH}_2\text{Cl}_2$  was added to the mixture and the organic layers were collected (3 times), and dried over anhydrous  $\text{Na}_2\text{SO}_4$ . The solvent was removed under reduced pressure. The residue was subjected to flash chromatography (silica gel 230-400 mesh, Hexanes:EtOAc = 19:1) to furnish the respective pure dienes **3a-u**.

#### Ethyl 2-phenyl-2-[(prop-2-en-1-yl)sulfanyl]pent-4-enoate (**3a**)<sup>9</sup>

(Spectra)

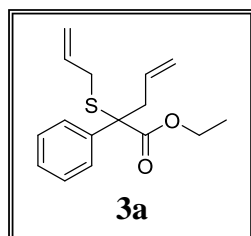

Yield 88%, colourless oil;  $R_f = 0.62$  (9:1 hexanes:ethyl acetate).

**IR** (neat):  $\nu_{\text{max}} = 2924, 2854, 1726, 1639, 1446, 1216, 1095, 1028, 919, 806, 701 \text{ cm}^{-1}$ .

**<sup>1</sup>H NMR (400 MHz, CDCl<sub>3</sub>)** δ 7.43-7.41 (m, 2H), 7.36-7.33 (m, 2H), 7.28-7.25 (m, 1H), 5.79-5.65 (m, 2H), 5.14-5.09 (m, 1H), 5.04-4.98 (m, 3H), 4.27 (q, *J* = 7.2 Hz, 2H), 3.07 (ddd, *J*<sub>1</sub> = 59.6 Hz, *J*<sub>2</sub> = 12.8 Hz, *J*<sub>3</sub> = 7.2 Hz, 2H), 2.90-2.88 (m, 2H), 1.29 (t, *J* = 7.2 Hz, 3H) ppm.

**<sup>13</sup>C{<sup>1</sup>H} NMR (101 MHz, CDCl<sub>3</sub>)** δ 172.2, 139.1, 133.3, 132.9, 128.2, 127.8, 127.4, 118.8, 117.9, 61.6, 60.8, 43.3, 33.6, 14.1 ppm.

**HRMS (ESI) *m/z*:** [M+Na]<sup>+</sup> Calcd for [C<sub>16</sub>H<sub>20</sub>O<sub>2</sub>S+Na]<sup>+</sup> 299.1082; Found: 299.1075.

### Methyl 2-phenyl-2-[(prop-2-en-1-yl)sulfanyl]pent-4-enoate (3b)<sup>10</sup>

(Spectra)

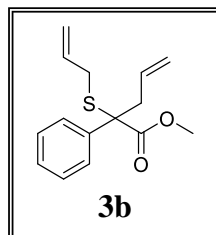

Yield 90%, colourless oil; *R*<sub>f</sub> = 0.58 (9:1 hexanes:ethyl acetate).

**IR (neat):** *v*<sub>max</sub> = 2982, 1726, 1638, 1437, 1214, 1122, 991, 918, 698 cm<sup>-1</sup>.

**<sup>1</sup>H NMR (400 MHz, CDCl<sub>3</sub>)** δ 7.34-7.32 (m, 2H), 7.27-7.23 (m, 2H), 7.19-7.15 (m, 1H), 5.70-5.56 (m, 2H), 5.05-5.01 (m, 1H), 4.95-4.89 (m, 3H), 3.68 (s, 3H), 2.98 (ddd, *J*<sub>1</sub> = 51.2 Hz, *J*<sub>2</sub> = 12.8 Hz, *J*<sub>3</sub> = 7.2 Hz, 2H), 2.83-2.81 (m, 2H) ppm.

**<sup>13</sup>C{<sup>1</sup>H} NMR (101 MHz, CDCl<sub>3</sub>)** δ 172.8, 139.0, 133.2, 132.8, 128.3, 127.8, 127.5, 118.9, 117.9, 60.8, 52.6, 43.2, 33.6 ppm.

**HRMS (ESI) *m/z*:** [M+H]<sup>+</sup> Calcd for [C<sub>15</sub>H<sub>18</sub>O<sub>2</sub>S+H]<sup>+</sup> 263.1106; Found: 263.1118.

### 2-Methylpropyl 2-phenyl-2-[(prop-2-en-1-yl)sulfanyl]pent-4-enoate (3c)

(Spectra)

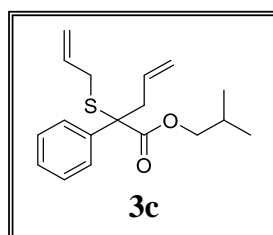

Yield 69%, colourless oil; *R*<sub>f</sub> = 0.64 (9:1 hexanes:ethyl acetate).

**IR (neat):** *v*<sub>max</sub> = 2963, 1723, 1638, 1467, 1440, 1210, 991, 917, 752, 699 cm<sup>-1</sup>.

**<sup>1</sup>H NMR (400 MHz, CDCl<sub>3</sub>)** δ 7.37-7.34 (m, 2H), 7.28-7.24 (m, 2H), 7.20-7.16 (m, 1H), 5.71-5.58 (m, 2H), 5.06-5.02 (m, 1H), 4.96-4.91 (m, 3H), 3.90 (d, *J* = 6.4 Hz, 2H), 2.99 (ddd, *J*<sub>1</sub> = 58.0 Hz, *J*<sub>2</sub> = 12.4 Hz, *J*<sub>3</sub> = 6.8 Hz, 2H), 2.84 (d, *J* = 7.2 Hz, 2H), 1.93-1.83 (m, 1H), 0.84-0.82 (m, 6H) ppm.

**<sup>13</sup>C{<sup>1</sup>H} NMR (101 MHz, CDCl<sub>3</sub>)** δ 172.3, 139.1, 133.2, 133.0, 128.2, 127.9, 127.4, 118.7, 117.9, 71.8, 60.9, 43.1, 33.6, 27.8, 19.2 ppm.

**HRMS (ESI)  $m/z$ :**  $[M+H]^+$  Calcd for  $[C_{18}H_{24}O_2S+H]^+$  305.1575; Found: 305.1577.

**(Furan-2-yl)methyl 2-(4-bromophenyl)-2-[(prop-2-en-1-yl)sulfanyl]pent-4-enoate (3d)**

**(Spectra)**

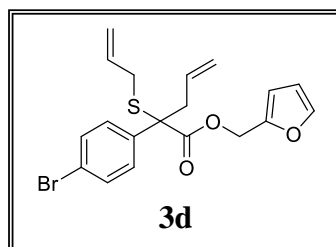

Yield 94%, colourless oil;  $R_f = 0.58$  (9:1 hexanes:ethyl acetate).

**IR** (neat):  $\nu_{\max} = 2926, 1728, 1637, 1489, 1204, 1006, 922, 821, 747 \text{ cm}^{-1}$ .

**$^1\text{H NMR}$  (400 MHz,  $\text{CDCl}_3$ )**  $\delta$  7.37-7.34 (m, 3H), 7.19-7.16 (m, 2H), 6.37-6.36 (m, 1H), 6.29-6.28 (m, 1H), 5.65-5.48 (m, 2H), 5.15-5.08 (m, 2H), 5.03-4.83 (m, 4H), 2.92 (ddd,  $J_1 = 59.2 \text{ Hz}$ ,  $J_2 = 12.8 \text{ Hz}$ ,  $J_3 = 7.2 \text{ Hz}$ , 2H), 2.75 (ddd,  $J_1 = 37.6 \text{ Hz}$ ,  $J_2 = 14.4 \text{ Hz}$ ,  $J_3 = 7.2 \text{ Hz}$ , 2H) ppm.

**$^{13}\text{C}\{^1\text{H}\}$  NMR (101 MHz,  $\text{CDCl}_3$ )**  $\delta$  171.3, 149.0, 143.3, 137.8, 132.8, 132.2, 131.3, 129.8, 121.5, 119.4, 118.2, 111.3, 110.7, 60.3, 59.0, 43.3, 33.7 ppm.

**HRMS (ESI)  $m/z$ :**  $[M+H]^+$  Calcd for  $[C_{19}H_{19}BrO_3S+H]^+$  407.0317; Found: 407.0319.

**Methyl 2-(4-chlorophenyl)-2-[(prop-2-en-1-yl)sulfanyl]pent-4-enoate (3e)**

**(Spectra)**

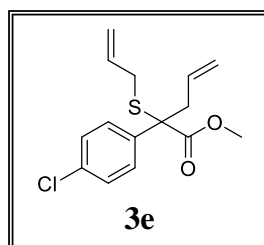

Yield 70%, colourless oil;  $R_f = 0.60$  (9:1 hexanes:ethyl acetate).

**IR** (neat):  $\nu_{\max} = 2924, 1728, 1639, 1490, 1436, 1218, 1094, 1011, 992, 921, 822 \text{ cm}^{-1}$ .

**$^1\text{H NMR}$  (400 MHz,  $\text{CDCl}_3$ )**  $\delta$  7.30-7.27 (m, 2H), 7.25-7.23 (m, 2H), 5.71-5.52 (m, 2H), 5.08-5.03 (m, 1H), 4.98-4.88 (m, 3H), 3.70 (s, 3H), 2.98 (ddd,  $J_1 = 50.4 \text{ Hz}$ ,  $J_2 = 12.8 \text{ Hz}$ ,  $J_3 = 7.2 \text{ Hz}$ , 2H), 2.85-2.72 (m, 2H) ppm.

**$^{13}\text{C}\{^1\text{H}\}$  NMR (101 MHz,  $\text{CDCl}_3$ )**  $\delta$  172.3, 137.5, 133.3, 132.9, 132.4, 129.4, 128.4, 119.2, 118.1, 60.2, 52.7, 43.1, 33.6 ppm.

**HRMS (ESI)  $m/z$ :**  $[M+H]^+$  Calcd for  $[C_{15}H_{17}ClO_2S+H]^+$  297.0716; Found: 297.0711.



### 2-Methylpropyl 2-(4-chlorophenyl)-2-[(prop-2-en-1-yl)sulfanyl]pent-4-enoate (3f)

(Spectra)

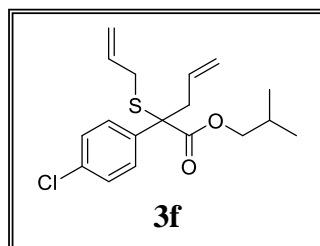

Yield 65%, colourless oil;  $R_f = 0.64$  (9:1 hexanes:ethyl acetate).

**IR** (neat):  $\nu_{\max} = 2963, 1723, 1639, 1490, 1209, 1094, 1003, 918, 821, 767 \text{ cm}^{-1}$ .

**$^1\text{H NMR}$  (400 MHz,  $\text{CDCl}_3$ )**  $\delta$  7.32-7.29 (m, 2H), 7.25-7.19 (m, 2H), 5.70-5.54 (m, 2H), 5.07-5.02 (m, 1H), 4.98-4.89 (m, 3H), 3.90 (d,  $J = 6.8 \text{ Hz}$ , 2H), 2.98 (ddd,  $J_1 = 56.4 \text{ Hz}$ ,  $J_2 = 12.8 \text{ Hz}$ ,  $J_3 = 6.8 \text{ Hz}$ , 2H), 2.80 (ddd,  $J_1 = 26.0 \text{ Hz}$ ,  $J_2 = 14.0 \text{ Hz}$ ,  $J_3 = 6.8 \text{ Hz}$ , 2H), 1.93-1.83 (m, 1H), 0.85-0.83 (m, 6H) ppm.

**$^{13}\text{C}\{^1\text{H}\}$  NMR (101 MHz,  $\text{CDCl}_3$ )**  $\delta$  171.8, 137.7, 133.2, 132.9, 132.5, 129.5, 128.3, 119.1, 118.1, 71.9, 60.3, 43.1, 33.6, 27.8, 19.2 ppm.

**HRMS (ESI)  $m/z$ :**  $[\text{M}+\text{H}]^+$  Calcd for  $[\text{C}_{18}\text{H}_{23}\text{ClO}_2\text{S}+\text{H}]^+$  339.1186; Found: 339.1180.

### Methyl 2-(4-bromophenyl)-2-[(prop-2-en-1-yl)sulfanyl]pent-4-enoate (3g)

(Spectra)

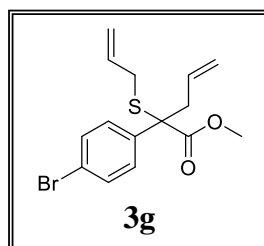

Yield 78%, colourless oil;  $R_f = 0.58$  (9:1 hexanes:ethyl acetate).

**IR** (neat):  $\nu_{\max} = 2982, 1726, 1638, 1486, 1435, 1214, 1071, 1002, 919, 818, 767 \text{ cm}^{-1}$ .

**$^1\text{H NMR}$  (400 MHz,  $\text{CDCl}_3$ )**  $\delta$  7.41-7.38 (m, 2H), 7.25-7.19 (m, 2H), 5.71-5.52 (m, 2H), 5.08-5.03 (m, 1H), 4.99-4.88 (m, 3H), 3.70 (s, 3H), 2.98 (ddd,  $J_1 = 50.0 \text{ Hz}$ ,  $J_2 = 12.4 \text{ Hz}$ ,  $J_3 = 6.8 \text{ Hz}$ , 2H), 2.78 (ddd,  $J_1 = 28.0 \text{ Hz}$ ,  $J_2 = 14.4 \text{ Hz}$ ,  $J_3 = 6.8 \text{ Hz}$ , 2H) ppm.

**$^{13}\text{C}\{^1\text{H}\}$  NMR (101 MHz,  $\text{CDCl}_3$ )**  $\delta$  172.2, 138.0, 132.9, 132.4, 131.4, 129.7, 121.5, 119.3, 118.2, 60.3, 52.7, 43.1, 33.6 ppm.

**HRMS (ESI)  $m/z$ :**  $[\text{M}+\text{H}]^+$  Calcd for  $[\text{C}_{15}\text{H}_{17}\text{BrO}_2\text{S}+\text{H}]^+$  341.0211; Found: 341.0205.

### Ethyl 2-(2-fluorophenyl)-2-[(prop-2-en-1-yl)sulfanyl]pent-4-enoate (3h)

Yield 80%, colourless oil;  $R_f = 0.62$  (9:1 hexanes:ethyl acetate).

**IR** (neat):  $\nu_{\max} = 2981, 1728, 1639, 1483, 1448, 1227, 1031, 922, 759 \text{ cm}^{-1}$ .

**$^1\text{H NMR}$  (400 MHz,  $\text{CDCl}_3$ )**  $\delta$  7.61-7.56 (m, 1H), 7.25-7.19 (m, 1H), 7.11-7.07 (m, 1H), 6.99-

6.93 (m, 1H), 5.77-5.67 (m, 1H), 5.56-5.45 (m, 1H), 5.15-5.10 (m, 1H), 5.03-5.00 (m, 1H), 4.89-4.81 (m, 2H), 4.23-4.12 (m, 2H), 3.10 (ddd,  $J_1 = 28.8$  Hz,  $J_2 = 12.8$  Hz,  $J_3 = 7.2$  Hz, 2H), 2.90-2.76 (m, 2H), 1.18 (t,  $J = 7.2$  Hz, 3H) ppm.

(Spectra)

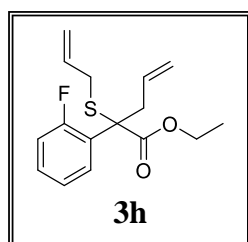

$^{13}\text{C}\{^1\text{H}\}$  NMR (101 MHz,  $\text{CDCl}_3$ )  $\delta$  171.4, 160.4 (d,  $J_{\text{C-F}} = 248.1$  Hz), 132.8, 132.4, 129.66 (d,  $J_{\text{C-F}} = 3.5$  Hz), 129.48 (d,  $J_{\text{C-F}} = 8.8$  Hz), 126.41 (d,  $J_{\text{C-F}} = 12.2$  Hz), 123.82 (d,  $J_{\text{C-F}} = 3.1$  Hz), 118.8, 118.3, 115.82 (d,  $J_{\text{C-F}} = 22.8$  Hz), 61.7, 56.90 (d,  $J_{\text{C-F}} = 1.4$  Hz), 41.40 (d,  $J_{\text{C-F}} = 1.5$  Hz), 33.4, 14.1 ppm.

HRMS (ESI)  $m/z$ :  $[\text{M}+\text{H}]^+$  Calcd for  $[\text{C}_{16}\text{H}_{19}\text{FO}_2\text{S}+\text{H}]^+$  295.1168; Found: 295.1171.

#### Methyl 2-(4-methylphenyl)-2-[(prop-2-en-1-yl)sulfanyl]pent-4-enoate (3i)

(Spectra)

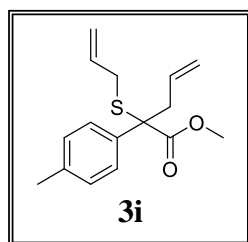

Yield 74%, colourless oil;  $R_f = 0.60$  (9:1 hexanes:ethyl acetate).

IR (neat):  $\nu_{\text{max}} = 2981, 1727, 1638, 1511, 1435, 1216, 1122, 992, 920, 814$   $\text{cm}^{-1}$ .

$^1\text{H}$  NMR (400 MHz,  $\text{CDCl}_3$ )  $\delta$  7.22-7.18 (m, 2H), 7.09-7.07 (m, 2H), 5.72-5.57 (m, 2H), 5.07-5.02 (m, 1H), 4.97-4.92 (m, 3H), 3.69 (s, 3H), 2.98 (ddd,  $J_1 = 49.6$  Hz,  $J_2 = 12.8$  Hz,  $J_3 = 6.8$  Hz, 2H), 2.82 (d,  $J = 7.2$  Hz, 2H), 2.26 (s, 3H) ppm.

$^{13}\text{C}\{^1\text{H}\}$  NMR (101 MHz,  $\text{CDCl}_3$ )  $\delta$  172.9, 137.2, 136.0, 133.3, 133.0, 129.0, 127.6, 118.7, 117.8, 60.6, 52.6, 43.2, 33.5, 21.0 ppm.

HRMS (ESI)  $m/z$ :  $[\text{M}+\text{H}]^+$  Calcd for  $[\text{C}_{16}\text{H}_{20}\text{O}_2\text{S}+\text{H}]^+$  277.1262; Found: 277.1255.

#### Methyl 2-(3-methoxyphenyl)-2-[(prop-2-en-1-yl)sulfanyl]pent-4-enoate (3j)

(Spectra)

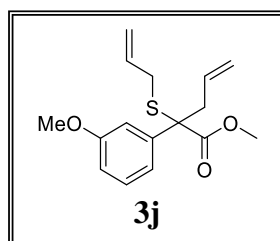

Yield 93%, colourless oil;  $R_f = 0.51$  (9:1 hexanes:ethyl acetate).

**IR** (neat):  $\nu_{\max}$  = 2949, 1727, 1637, 1593, 1488, 1431, 1216, 1047, 920, 779, 701  $\text{cm}^{-1}$ .

**$^1\text{H}$  NMR (400 MHz,  $\text{CDCl}_3$ )**  $\delta$  7.20-7.16 (m, 1H), 6.93-6.88 (m, 2H), 6.75-6.72 (m, 1H), 5.72-5.57 (m, 2H), 5.07-5.03 (m, 1H), 4.96-4.92 (m, 3H), 3.73 (s, 3H), 3.69 (s, 3H), 3.00 (ddd,  $J_1$  = 46.4 Hz,  $J_2$  = 12.4 Hz,  $J_3$  = 6.8 Hz, 2H), 2.82 (d,  $J$  = 6.8 Hz, 2H) ppm.

**$^{13}\text{C}\{^1\text{H}\}$  NMR (101 MHz,  $\text{CDCl}_3$ )**  $\delta$  172.7, 159.5, 140.6, 133.2, 132.9, 129.2, 120.1, 118.8, 117.9, 113.9, 112.6, 60.8, 55.3, 52.6, 43.1, 33.6 ppm.

**HRMS (ESI)  $m/z$ :**  $[\text{M}+\text{H}]^+$  Calcd for  $[\text{C}_{16}\text{H}_{20}\text{O}_3\text{S}+\text{H}]^+$  293.1211; Found: 293.1218.

### Ethyl 2-[(prop-2-en-1-yl)sulfanyl]-2-(3,4,5-trimethoxyphenyl)pent-4-enoate (**3k**)

(Spectra)

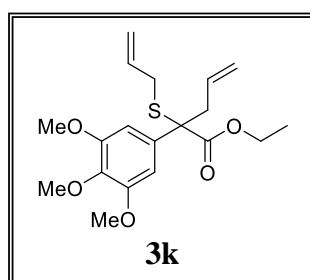

Yield 79%, colourless oil;  $R_f$  = 0.28 (9:1 hexanes:ethyl acetate).

**IR** (neat):  $\nu_{\max}$  = 2937, 1723, 1638, 1587, 1507, 1456, 1414, 1238, 1125, 1008, 921, 772  $\text{cm}^{-1}$ .

**$^1\text{H}$  NMR (400 MHz,  $\text{CDCl}_3$ )**  $\delta$  6.71 (s, 2H), 5.85-5.70 (m, 2H), 5.19-5.07 (m, 4H), 4.36-4.24 (m, 2H), 3.89 (s, 3H), 3.88 (s, 6H), 3.14 (ddd,  $J_1$  = 48.0 Hz,  $J_2$  = 12.8 Hz,  $J_3$  = 7.2 Hz, 2H), 2.91 (d,  $J$  = 7.2 Hz, 2H), 1.33 (t,  $J$  = 7.2 Hz, 3H) ppm.

**$^{13}\text{C}\{^1\text{H}\}$  NMR (101 MHz,  $\text{CDCl}_3$ )**  $\delta$  172.0, 152.8, 137.3, 134.6, 133.3, 133.0, 118.7, 117.9, 105.3, 61.7, 61.0, 60.9, 56.2, 43.2, 33.7, 14.2 ppm.

**HRMS (ESI)  $m/z$ :**  $[\text{M}+\text{H}]^+$  Calcd for  $[\text{C}_{19}\text{H}_{26}\text{O}_5\text{S}+\text{H}]^+$  367.1579; Found: 367.1563.

### Methyl 2-[(prop-2-en-1-yl)sulfanyl]-2-[3-(trifluoromethyl)phenyl]pent-4-enoate (**3l**)

(Spectra)

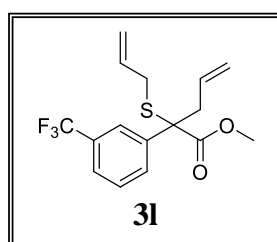

Yield 82%, colourless oil;  $R_f$  = 0.58 (9:1 hexanes:ethyl acetate).

**IR** (neat):  $\nu_{\max}$  = 2953, 1730, 1639, 1437, 1327, 1220, 1167, 1126, 1076, 922, 704  $\text{cm}^{-1}$ .

**$^1\text{H}$  NMR (400 MHz,  $\text{CDCl}_3$ )**  $\delta$  7.65 (s, 1H), 7.54-7.52 (m, 1H), 7.48-7.46 (m, 1H), 7.42-7.38 (m, 1H), 5.70-5.52 (m, 2H), 5.07-5.03 (m, 1H), 4.99-4.86 (m, 3H), 3.73 (s, 3H), 2.98 (ddd,  $J_1$  = 52.0 Hz,  $J_2$  = 12.8 Hz,  $J_3$  = 7.2 Hz, 2H), 2.82 (ddd,  $J_1$  = 34.4 Hz,  $J_2$  = 14.0 Hz,  $J_3$  = 7.2 Hz, 2H) ppm.

$^{13}\text{C}\{^1\text{H}\}$  NMR (101 MHz,  $\text{CDCl}_3$ )  $\delta$  172.0, 140.1, 132.7, 132.1, 131.6, 131.10-130.14 (q,  $J_{\text{C-F}} = 32.32$  Hz), 128.7, 128.09-119.96 (q,  $J_{\text{C-F}} = 273.71$  Hz), 124.92-124.80 (q,  $J_{\text{C-F}} = 4.04$  Hz), 124.45-124.33 (q,  $J_{\text{C-F}} = 4.04$  Hz), 119.5, 118.3, 60.4, 52.8, 43.2, 33.7 ppm.

HRMS (ESI)  $m/z$ :  $[\text{M}+\text{H}]^+$  Calcd for  $[\text{C}_{16}\text{H}_{17}\text{F}_3\text{O}_2\text{S}+\text{H}]^+$  331.0980; Found: 331.0987.

### Ethyl 2-(4-nitrophenyl)-2-[(prop-2-en-1-yl)sulfanyl]pent-4-enoate (3m)

(Spectra)

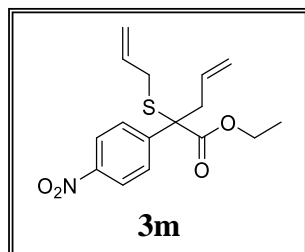

Yield 72%, colourless oil;  $R_f = 0.46$  (9:1 hexanes:ethyl acetate).

IR (neat):  $\nu_{\text{max}} = 2983, 1727, 1640, 1602, 1523, 1350, 1220, 1114, 1023, 925, 856, 707$   $\text{cm}^{-1}$ .

$^1\text{H}$  NMR (400 MHz,  $\text{CDCl}_3$ )  $\delta$  8.14-8.12 (m, 2H), 7.57-7.55 (m, 2H), 5.70-5.51 (m, 2H), 5.09-4.85 (m, 4H), 4.22 (q,  $J = 7.2$  Hz, 2H), 3.00 (ddd,  $J_1 = 59.2$  Hz,  $J_2 = 12.8$  Hz,  $J_3 = 7.2$  Hz, 2H) 2.90-2.72 (m, 2H), 1.24 (t,  $J = 7.2$  Hz, 3H) ppm.

$^{13}\text{C}\{^1\text{H}\}$  NMR (101 MHz,  $\text{CDCl}_3$ )  $\delta$  170.9, 147.0, 146.5, 132.5, 131.8, 129.2, 123.3, 119.8, 118.5, 62.1, 60.3, 43.2, 33.7, 14.1 ppm.

HRMS (ESI)  $m/z$ :  $[\text{M}+\text{H}]^+$  Calcd for  $[\text{C}_{16}\text{H}_{19}\text{NO}_4\text{S}+\text{H}]^+$  322.1113; Found: 322.1118.

### Methyl 2-(naphthalen-1-yl)-2-[(prop-2-en-1-yl)sulfanyl]pent-4-enoate (3n)

(Spectra)

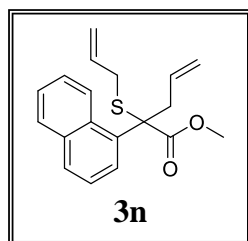

Yield 67%, colourless oil;  $R_f = 0.51$  (9:1 hexanes:ethyl acetate).

IR (neat):  $\nu_{\text{max}} = 2980, 1722, 1637, 1433, 1213, 1126, 1036, 990, 919, 778$   $\text{cm}^{-1}$ .

$^1\text{H}$  NMR (400 MHz,  $\text{CDCl}_3$ )  $\delta$  7.83-7.72 (m, 4H), 7.41-7.17 (m, 3H), 5.71-5.52 (m, 2H), 5.07-5.02 (m, 1H), 4.97-4.87 (m, 3H), 3.57 (s, 3H), 3.13 (ddd,  $J_1 = 39.6$  Hz,  $J_2 = 14.4$  Hz,  $J_3 = 6.0$  Hz, 2H), 2.96 (ddd,  $J_1 = 35.6$  Hz,  $J_2 = 13.2$  Hz,  $J_3 = 7.2$  Hz, 2H) ppm.

$^{13}\text{C}\{^1\text{H}\}$  NMR (101 MHz,  $\text{CDCl}_3$ )  $\delta$  173.7, 134.5, 133.7, 133.2, 132.7, 130.9, 129.5, 129.2, 126.4, 126.2, 125.5, 124.7, 123.8, 118.5, 118.1, 60.4, 52.7, 41.5, 33.2 ppm.

HRMS (ESI)  $m/z$ :  $[\text{M}+\text{H}]^+$  Calcd for  $[\text{C}_{19}\text{H}_{20}\text{O}_2\text{S}+\text{H}]^+$  313.1262; Found: 313.1257.

**Methyl 2-[(prop-2-en-1-yl)sulfanyl]-2-(thiophen-3-yl)pent-4-enoate (3o)**

(Spectra)

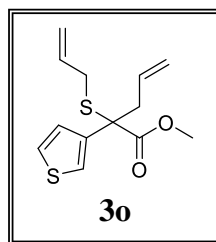

Yield 77%, colourless oil;  $R_f = 0.58$  (9:1 hexanes:ethyl acetate).

**IR** (neat):  $\nu_{\max} = 2981, 1728, 1638, 1436, 1212, 1164, 992, 921, 785, 691 \text{ cm}^{-1}$ .

**$^1\text{H NMR}$  (400 MHz,  $\text{CDCl}_3$ )**  $\delta$  7.26-7.25 (m, 1H), 7.23-7.19 (m, 1H), 7.07-7.05 (m, 1H), 5.68-5.55 (m, 2H), 5.05-4.94 (m, 4H), 3.70 (s, 3H), 2.99 (ddd,  $J_1 = 40.8 \text{ Hz}$ ,  $J_2 = 12.8 \text{ Hz}$ ,  $J_3 = 6.8 \text{ Hz}$ , 2H), 2.86 (ddd,  $J_1 = 26.8 \text{ Hz}$ ,  $J_2 = 14.4 \text{ Hz}$ ,  $J_3 = 7.2 \text{ Hz}$ , 2H) ppm.

**$^{13}\text{C}\{^1\text{H}\}$  NMR (101 MHz,  $\text{CDCl}_3$ )**  $\delta$  172.1, 139.8, 133.2, 132.8, 127.6, 125.6, 123.5, 118.8, 117.8, 57.2, 52.7, 42.6, 33.6 ppm.

**HRMS (ESI)**  $m/z$ :  $[\text{M}+\text{H}]^+$  Calcd for  $[\text{C}_{13}\text{H}_{16}\text{O}_2\text{S}_2+\text{H}]^+$  269.0670; Found: 269.0667.

**(2S)-2-Methylbutyl 2-(4-chlorophenyl)-2-[(prop-2-en-1-yl)sulfanyl]pent-4-enoate (3p)**

(Spectra)

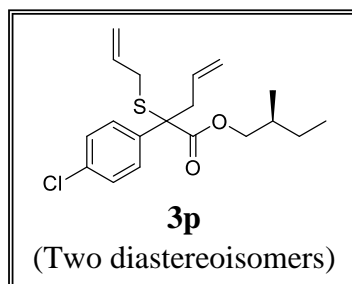

Yield 75%, *dr* 1.7:1, colourless oil;  $R_f = 0.69$  (9:1 hexanes:ethyl acetate);  $[\alpha]_{\text{D}}^{25} = +1.9$  (*c* 0.34,  $\text{CHCl}_3$ ).

**IR** (neat):  $\nu_{\max} = 2964, 2929, 1724, 1639, 1490, 1462, 1212, 1095, 993, 921, 824, 765 \text{ cm}^{-1}$ .

**$^1\text{H NMR}$  (400 MHz,  $\text{CDCl}_3$ )**  $\delta$  7.32-7.29 (m, 2H), 7.25-7.22 (m, 2H), 5.70-5.54 (m, 2H), 5.05 (dd,  $J_1 = 16.8 \text{ Hz}$ ,  $J_2 = 1.2 \text{ Hz}$ , 1H), 4.98-4.89 (m, 3H), 4.02-3.98 (m, 1H), 3.94-3.90 (m, 1H), 2.97 (ddd,  $J_1 = 56.4 \text{ Hz}$ ,  $J_2 = 12.8 \text{ Hz}$ ,  $J_3 = 6.8 \text{ Hz}$ , 2H), 2.79 (ddd,  $J_1 = 25.6 \text{ Hz}$ ,  $J_2 = 14.4 \text{ Hz}$ ,  $J_3 = 6.8 \text{ Hz}$ , 2H), 1.69-1.61 (m, 1H), 1.35-1.26 (m, 1H), 1.15-1.06 (m, 1H), 0.84-0.79 (m, 6H) ppm.

**$^{13}\text{C}\{^1\text{H}\}$  NMR (101 MHz,  $\text{CDCl}_3$ )**  $\delta$  171.8, 137.7, 133.2, 132.9, 132.5, 129.5, 128.3, 119.1, 118.1, 70.40, 70.38, 60.4, 43.1, 43.0, 34.14, 34.12, 33.6, 26.0, 16.54, 16.50, 11.20, 11.16 ppm.

**HRMS (ESI)**  $m/z$ :  $[\text{M}+\text{H}]^+$  Calcd for  $[\text{C}_{19}\text{H}_{25}\text{ClO}_2\text{S}+\text{H}]^+$  353.1342; Found: 353.1337.

**(1*R*,2*S*,5*R*)-5-Methyl-2-(propan-2-yl)cyclohexyl-2-(3-chlorophenyl)-2-[(prop-2-en-1-yl)sulfanyl]pent-4-enoate (3q)**

**(Spectra)**

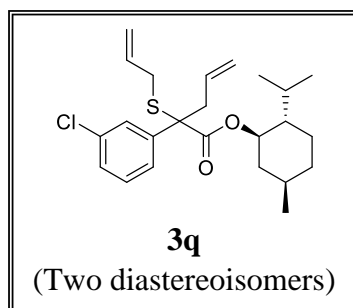

Yield 81%, *dr* 1.9:1, colourless oil;  $R_f = 0.69$  (9:1 hexanes:ethyl acetate);  $[\alpha]_D^{27} = -47.0$  ( $c$  0.273,  $\text{CHCl}_3$ ).

**IR** (neat):  $\nu_{\text{max}} = 2955, 2926, 1718, 1639, 1458, 1218, 1186, 988, 958, 918, 777, 698 \text{ cm}^{-1}$ .

**$^1\text{H NMR}$  (400 MHz,  $\text{CDCl}_3$ )**  $\delta$  7.49-7.47 (m, 1H), 7.39-7.35 (m, 1H), 7.33-7.27 (m, 2H), 5.85-5.62 (m, 2H), 5.20-4.99 (m, 4H), 4.81 (ddd,  $J_1 = 21.6 \text{ Hz}$ ,  $J_2 = 10.8 \text{ Hz}$ ,  $J_3 = 4.4 \text{ Hz}$ , 1H), 3.21-2.81 (m, 4H), 2.15-2.05 (m, 1H), 1.92-1.68 (m, 3H), 1.61-1.55 (m, 1H), 1.47-1.36 (m, 1H), 1.15-1.01 (m, 2H), 0.98-0.95 (m, 3H), 0.89-0.85 (m, 4H), 0.81-0.77 (m, 3H) ppm.

**$^{13}\text{C}\{^1\text{H}\}$  NMR (101 MHz,  $\text{CDCl}_3$ )**  $\delta$  171.1, 171.0, 141.8, 141.1, 134.2, 134.1, 133.0, 132.8, 132.6, 132.4, 129.4, 129.3, 128.3, 128.1, 127.6, 127.5, 126.3, 126.0, 119.1, 118.3, 118.1, 76.2, 76.0, 60.8, 60.3, 47.08, 47.05, 43.1, 42.1, 40.6, 40.4, 34.2, 34.1, 33.7, 33.3, 31.49, 31.45, 25.8, 25.7, 23.0, 22.9, 22.1, 20.9, 20.8, 15.82, 15.79 ppm.

**HRMS (ESI)  $m/z$ :**  $[\text{M}+\text{H}]^+$  Calcd for  $[\text{C}_{24}\text{H}_{33}\text{ClO}_2\text{S}+\text{H}]^+$  421.1968; Found: 421.1978.

**Prop-2-en-1-yl 2-phenyl-2-[(prop-2-en-1-yl)sulfanyl]pent-4-enoate (3r)**

**(Spectra)**

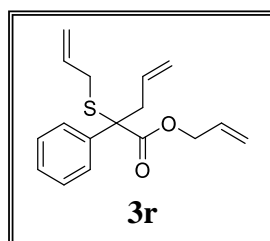

Yield 77%, colourless oil;  $R_f = 0.58$  (9:1 hexanes:ethyl acetate).

**IR** (neat):  $\nu_{\text{max}} = 3080, 1726, 1641, 1441, 1209, 1121, 990, 921, 754, 701 \text{ cm}^{-1}$ .

**$^1\text{H NMR}$  (400 MHz,  $\text{CDCl}_3$ )**  $\delta$  7.44-7.42 (m, 2H), 7.36-7.32 (m, 2H), 7.28-7.25 (m, 1H), 5.97-5.87 (m, 1H), 5.79-5.64 (m, 2H), 5.34-5.30 (m, 1H), 5.25-5.22 (m, 1H), 5.13-5.09 (m, 1H), 5.04-4.98 (m, 3H), 4.69 (d,  $J = 6.0 \text{ Hz}$ , 2H), 3.07 (ddd,  $J_1 = 58.0 \text{ Hz}$ ,  $J_2 = 12.8 \text{ Hz}$ ,  $J_3 = 7.2 \text{ Hz}$ , 2H), 2.96-2.86 (m, 2H) ppm.

**$^{13}\text{C}\{^1\text{H}\}$  NMR (101 MHz,  $\text{CDCl}_3$ )**  $\delta$  171.9, 138.9, 133.2, 132.8, 131.7, 128.2, 127.8, 127.5, 118.9, 118.8, 117.9, 66.1, 60.8, 43.3, 33.7 ppm.

**HRMS (ESI)  $m/z$ :**  $[M+H]^+$  Calcd for  $[C_{17}H_{20}O_2S+H]^+$  289.1262; Found: 289.1258.

**1-Benzyl-3-(prop-2-en-1-yl)-3-[(prop-2-en-1-yl)sulfanyl]-1,3-dihydro-2H-indol-2-one (3s)**

(Spectra)

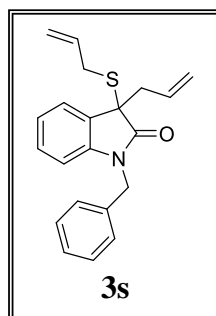

Yield 89%, colourless oil;  $R_f = 0.40$  (9:1 hexanes:ethyl acetate).

**IR (neat):**  $\nu_{\max} = 2921, 1711, 1638, 1609, 1489, 1464, 1352, 1172, 995, 923, 749, 696 \text{ cm}^{-1}$ .

**$^1\text{H NMR}$  (400 MHz,  $\text{CDCl}_3$ )**  $\delta$  7.29 (d,  $J = 7.2 \text{ Hz}$ , 1H), 7.23-7.16 (m, 5H), 7.12-7.08 (m, 1H), 6.99 (t,  $J = 7.6 \text{ Hz}$ , 1H), 6.62 (d,  $J = 8.0 \text{ Hz}$ , 1H), 5.67-5.57 (m, 1H), 5.47-5.37 (m, 1H), 5.03-4.84 (m, 5H), 4.69-4.66 (m, 1H), 3.12-3.00 (m, 2H), 2.85-2.74 (m, 2H) ppm.

**$^{13}\text{C}\{^1\text{H}\}$  NMR (101 MHz,  $\text{CDCl}_3$ )**  $\delta$  176.7, 142.5, 135.7, 133.7, 131.3, 128.9, 128.8, 127.7, 127.4, 124.4, 122.9, 119.9, 117.6, 109.2, 54.1, 43.9, 40.4, 32.2 ppm.

**HRMS (ESI)  $m/z$ :**  $[M+H]^+$  Calcd for  $[C_{21}H_{21}NOS+H]^+$  336.1422; Found: 336.1414.

**Prop-2-yn-1-yl 2-phenyl-2-[(prop-2-en-1-yl)sulfanyl]pent-4-enoate (3t)**

(Spectra)

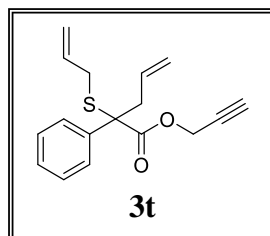

Yield 78%, colourless oil;  $R_f = 0.50$  (9:1 hexanes:ethyl acetate).

**IR (neat):**  $\nu_{\max} = 3292, 3078, 1729, 1638, 1438, 1201, 1119, 992, 921, 753, 697, 640 \text{ cm}^{-1}$ .

**$^1\text{H NMR}$  (400 MHz,  $\text{CDCl}_3$ )**  $\delta$  7.36-7.33 (m, 2H), 7.29-7.25 (m, 2H), 7.22-7.18 (m, 1H), 5.73-5.55 (m, 2H), 5.08-5.03 (m, 1H), 4.98-4.91 (m, 3H), 4.72-4.71 (m, 2H), 3.03 (ddd,  $J_1 = 68.0 \text{ Hz}$ ,  $J_2 = 12.8 \text{ Hz}$ ,  $J_3 = 7.2 \text{ Hz}$ , 2H), 2.88-2.77 (m, 2H), 2.41 (t,  $J = 2.4 \text{ Hz}$ , 1H) ppm.

**$^{13}\text{C}\{^1\text{H}\}$  NMR (101 MHz,  $\text{CDCl}_3$ )**  $\delta$  171.5, 138.5, 133.1, 132.5, 128.3, 127.8, 127.6, 119.2, 118.1, 77.2, 75.3, 60.5, 52.8, 43.5, 33.7 ppm.

**HRMS (ESI)  $m/z$ :**  $[M+H]^+$  Calcd for  $[C_{17}H_{18}O_2S+H]^+$  287.1106; Found: 287.1112.

**Methyl 2-[(2E)-but-2-en-1-yl]sulfanyl-3-methyl-2-phenylpent-4-enoate (3u)**

Yield 68%, *dr* 1.2:1, colourless oil;  $R_f = 0.60$  (9:1 hexanes:ethyl acetate).

**IR (neat):**  $\nu_{\max} = 2973, 1725, 1441, 1232, 1185, 1024, 965, 920, 756, 706 \text{ cm}^{-1}$ .

**<sup>1</sup>H NMR (400 MHz, CDCl<sub>3</sub>)** δ 7.38-7.34 (m, 2H), 7.28-7.24 (m, 2H), 7.23-7.19 (m, 1H), 5.72-5.44 (m, 2H), 5.37-5.27 (m, 1H), 4.98-4.90 (m, 2H), 3.77-3.73 (m, 3H), 3.10-2.92 (m, 2H), 2.91-2.81 (m, 1H), 1.57-1.51 (m, 3H), 0.92-0.89 (m, 3H) ppm.

(Spectra)

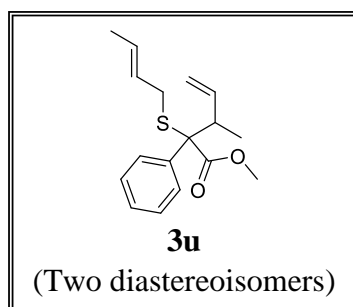

**<sup>13</sup>C{<sup>1</sup>H} NMR (101 MHz, CDCl<sub>3</sub>)** δ 172.4, 172.3, 139.3, 138.5, 136.11, 136.06, 135.3, 129.9, 129.7, 129.5, 128.7, 127.5, 127.4, 127.3, 125.29, 125.26, 124.0, 123.9, 116.8, 116.7, 116.3, 64.9, 64.5, 52.4, 52.2, 45.7, 45.6, 44.8, 44.7, 33.5, 33.4, 27.9, 27.7, 17.9, 17.71, 17.67, 15.8, 12.8 ppm.

**HRMS (ESI) *m/z*:** [M+H]<sup>+</sup> Calcd for [C<sub>17</sub>H<sub>22</sub>O<sub>2</sub>S+H]<sup>+</sup> 291.1419; Found: 291.1415.

### 5. General procedure for the synthesis of thiopyrans **4** via ring-closing metathesis

A 5 mL screw cap vial was charged with dienes **3a-s,u** (0.2 mmol) and 2 mL of water was added. Then, 10 mol% of Grubbs' second-generation catalyst (G-II) was added. The reaction was monitored using TLC. The reaction was allowed to stir until the complete conversion of the starting material. Then, to the reaction mixture, CH<sub>2</sub>Cl<sub>2</sub> was added and separated the organic layer (3 x 20 mL) and dried over anhydrous Na<sub>2</sub>SO<sub>4</sub>. The whole of the organic layer was concentrated under reduced pressure followed by purification using flash chromatography (silica gel, 230-400 mesh, Hexanes:EtOAc = 9:1) to afford the respective 3,6-dihydro-2*H*-thiopyrans **4a-s,u**.

#### Ethyl 2-phenyl-3,6-dihydro-2*H*-thiopyran-2-carboxylate (**4a**)

(Spectra)

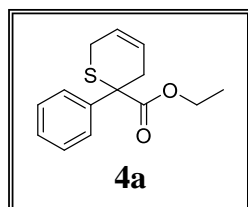

Yield 89%, colourless oil; R<sub>f</sub> = 0.46 (9:1 hexanes:ethyl acetate).

**IR** (neat): ν<sub>max</sub> = 2977, 1728, 1447, 1226, 1187, 1093, 1034, 727, 696, 649 cm<sup>-1</sup>.

**<sup>1</sup>H NMR (400 MHz, CDCl<sub>3</sub>)** δ 7.46-7.44 (m, 2H), 7.30-7.25 (m, 2H), 7.22-7.18 (m, 1H), 5.89-5.84 (m, 1H), 5.79-5.74 (m, 1H), 4.15-4.07 (m, 2H), 3.26-3.19 (m, 1H), 3.07-3.00 (m, 1H), 2.92-2.84 (m, 2H), 1.13 (t, *J* = 7.2 Hz, 3H) ppm.



$^{13}\text{C}\{^1\text{H}\}$  NMR (101 MHz,  $\text{CDCl}_3$ )  $\delta$  172.2, 139.9, 128.5, 127.7, 126.9, 126.7, 123.8, 62.0, 54.4, 34.6, 26.6, 14.0 ppm.

HRMS (ESI)  $m/z$ :  $[\text{M}+\text{H}]^+$  Calcd for  $[\text{C}_{14}\text{H}_{16}\text{O}_2\text{S}+\text{H}]^+$  249.0949; Found: 249.0944.

#### Methyl 2-phenyl-3,6-dihydro-2H-thiopyran-2-carboxylate (4b)

(Spectra)

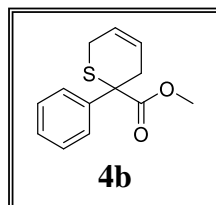

Yield 88%, colourless crystalline solid; mp 98-100 °C;  $R_f$  = 0.40 (9:1 hexanes:ethyl acetate).

IR (neat):  $\nu_{\text{max}}$  = 2923, 2853, 1729, 1493, 1438, 1229, 1032, 727, 694, 650  $\text{cm}^{-1}$ .

$^1\text{H}$  NMR (400 MHz,  $\text{CDCl}_3$ )  $\delta$  7.42 (d,  $J$  = 8.0 Hz, 2H), 7.26-7.22 (m, 2H), 7.20-7.16 (m, 1H), 5.85-5.81 (m, 1H), 5.75-5.71 (m, 1H), 3.60 (s, 3H), 3.22-3.17 (m, 1H), 3.04-2.98 (m, 1H), 2.89-2.81 (m, 2H) ppm.

$^{13}\text{C}\{^1\text{H}\}$  NMR (101 MHz,  $\text{CDCl}_3$ )  $\delta$  172.8, 139.8, 128.6, 127.8, 126.8, 126.7, 123.8, 54.5, 53.2, 34.6, 26.6 ppm.

HRMS (ESI)  $m/z$ :  $[\text{M}+\text{H}]^+$  Calcd for  $[\text{C}_{13}\text{H}_{14}\text{O}_2\text{S}+\text{H}]^+$  235.0793; Found: 235.0790.

#### 2-Methylpropyl 2-phenyl-3,6-dihydro-2H-thiopyran-2-carboxylate (4c)

(Spectra)

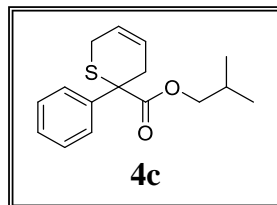

Yield 91%, colourless oil;  $R_f$  = 0.42 (9:1 hexanes:ethyl acetate).

IR (neat):  $\nu_{\text{max}}$  = 2961, 2927, 1727, 1466, 1222, 1184, 1029, 994, 726, 696, 650  $\text{cm}^{-1}$ .

$^1\text{H}$  NMR (400 MHz,  $\text{CDCl}_3$ )  $\delta$  7.48-7.46 (m, 2H), 7.28-7.25 (m, 2H), 7.22-7.18 (m, 1H), 5.89-5.84 (m, 1H), 5.78-5.74 (m, 1H), 3.85-3.78 (m, 2H), 3.24-3.19 (m, 1H), 3.08-3.02 (m, 1H), 2.95-2.84 (m, 2H), 1.86-1.76 (m, 1H), 0.76 (dd,  $J_1$  = 6.8 Hz,  $J_2$  = 1.6 Hz, 6H) ppm.

$^{13}\text{C}\{^1\text{H}\}$  NMR (101 MHz,  $\text{CDCl}_3$ )  $\delta$  172.3, 139.8, 128.4, 127.7, 126.8, 123.9, 71.9, 54.6, 34.4, 27.7, 26.6, 18.9 ppm.

HRMS (ESI)  $m/z$ :  $[\text{M}+\text{H}]^+$  Calcd for  $[\text{C}_{16}\text{H}_{20}\text{O}_2\text{S}+\text{H}]^+$  277.1262; Found: 277.1257.

#### (Furan-2-yl)methyl 2-(4-bromophenyl)-3,6-dihydro-2H-thiopyran-2-carboxylate (4d)

Yield 80%, colourless oil;  $R_f$  = 0.38 (9:1 hexanes:ethyl acetate).

IR (neat):  $\nu_{\text{max}}$  = 2924, 1731, 1490, 1220, 1076, 1014, 922, 816, 747, 648  $\text{cm}^{-1}$ .

**<sup>1</sup>H NMR (400 MHz, CDCl<sub>3</sub>)**  $\delta$  7.36-7.34 (m, 2H), 7.30-7.25 (m, 3H), 6.29-6.26 (m, 2H), 5.83-5.80 (m, 1H), 5.74-5.72 (m, 1H), 5.03 (ABq,  $\Delta\delta_{AB}$  = 0.02,  $J_{AB}$  = 13.2 Hz, 2H), 3.18-3.13 (m, 1H), 3.01-2.96 (m, 1H), 2.85-2.80 (m, 2H) ppm.

(Spectra)

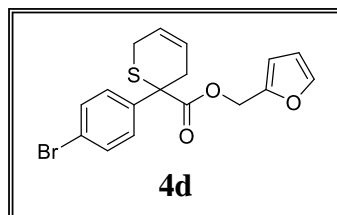

**<sup>13</sup>C{<sup>1</sup>H} NMR (101 MHz, CDCl<sub>3</sub>)**  $\delta$  171.5, 148.9, 143.3, 138.7, 131.6, 128.6, 126.4, 123.8, 121.9, 111.1, 110.6, 59.5, 54.0, 34.3, 26.4 ppm.

**HRMS (ESI)  $m/z$ :** [M+H]<sup>+</sup> Calcd for [C<sub>17</sub>H<sub>15</sub>BrO<sub>3</sub>S+H]<sup>+</sup> 379.0004; Found: 379.0012.

**Methyl 2-(4-chlorophenyl)-3,6-dihydro-2H-thiopyran-2-carboxylate (4e)**

(Spectra)

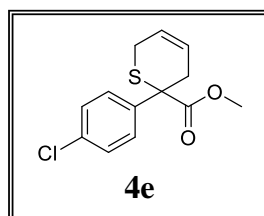

Yield 85%, colourless oil;  $R_f$  = 0.40 (9:1 hexanes:ethyl acetate).

**IR (neat):**  $\nu_{max}$  = 2925, 2854, 1734, 1491, 1235, 1095, 1023, 814, 764, 732, 645 cm<sup>-1</sup>.

**<sup>1</sup>H NMR (400 MHz, CDCl<sub>3</sub>)**  $\delta$  7.41-7.38 (m, 2H), 7.26-7.19 (m, 2H), 5.88-5.82 (m, 1H), 5.79-5.73 (m, 1H), 3.64 (s, 3H), 3.21-3.15 (m, 1H), 3.04-2.97 (m, 1H), 2.90-2.82 (m, 2H) ppm.

**<sup>13</sup>C{<sup>1</sup>H} NMR (101 MHz, CDCl<sub>3</sub>)**  $\delta$  172.5, 138.2, 133.7, 128.7, 128.3, 126.4, 123.9, 53.9, 53.3, 34.3, 26.4 ppm.

**HRMS (ESI)  $m/z$ :** [M+H]<sup>+</sup> Calcd for [C<sub>13</sub>H<sub>13</sub>ClO<sub>2</sub>S+H]<sup>+</sup> 269.0403; Found: 269.0398.

**2-Methylpropyl 2-(4-chlorophenyl)-3,6-dihydro-2H-thiopyran-2-carboxylate (4f)**

(Spectra)

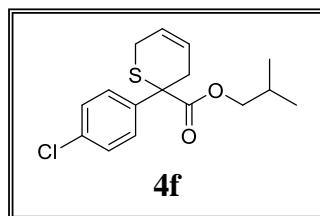

Yield 95%, colourless oil;  $R_f$  = 0.51 (9:1 *n*-hexanes:ethyl acetate).

**IR (neat):**  $\nu_{max}$  = 2962, 2929, 1727, 1490, 1223, 1186, 1093, 1021, 992, 812, 761, 644 cm<sup>-1</sup>.

**<sup>1</sup>H NMR (400 MHz, CDCl<sub>3</sub>)**  $\delta$  7.43-7.41 (m, 2H), 7.24-7.19 (m, 2H), 5.87-5.83 (m, 1H), 5.77-5.73 (m, 1H), 3.85-3.77 (m, 2H), 3.20-3.14 (m, 1H), 3.05-2.99 (m, 1H), 2.93-2.81 (m, 2H), 1.85-1.75 (m, 1H), 0.76 (dd,  $J_1$  = 6.8 Hz,  $J_2$  = 2.0 Hz, 6H) ppm.

$^{13}\text{C}\{^1\text{H}\}$  NMR (101 MHz,  $\text{CDCl}_3$ )  $\delta$  171.9, 138.3, 133.6, 128.6, 128.4, 126.4, 124.0, 72.1, 54.1, 34.1, 27.7, 26.4, 18.9 ppm.

HRMS (ESI)  $m/z$ :  $[\text{M}+\text{H}]^+$  Calcd for  $[\text{C}_{16}\text{H}_{19}\text{ClO}_2\text{S}+\text{H}]^+$  311.0873; Found: 311.0882.

#### Methyl 2-(4-bromophenyl)-3,6-dihydro-2H-thiopyran-2-carboxylate (4g)

(Spectra)

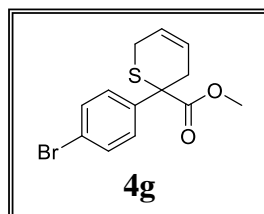

Yield 87%, colourless oil;  $R_f = 0.42$  (9:1 hexanes:ethyl acetate).

IR (neat):  $\nu_{\text{max}} = 2949, 1728, 1486, 1434, 1226, 1076, 1033, 1006, 808, 756, 727, 643 \text{ cm}^{-1}$ .

$^1\text{H}$  NMR (400 MHz,  $\text{CDCl}_3$ )  $\delta$  7.40-7.37 (m, 2H), 7.35-7.32 (m, 2H), 5.86-5.82 (m, 1H), 5.78-5.73 (m, 1H), 3.64 (s, 3H), 3.21-3.14 (m, 1H), 3.03-2.97 (m, 1H), 2.89-2.82 (m, 2H) ppm.

$^{13}\text{C}\{^1\text{H}\}$  NMR (101 MHz,  $\text{CDCl}_3$ )  $\delta$  172.4, 138.8, 131.6, 128.7, 126.4, 123.9, 121.9, 54.0, 53.3, 34.2, 26.4 ppm.

HRMS (ESI)  $m/z$ :  $[\text{M}+\text{H}]^+$  Calcd for  $[\text{C}_{13}\text{H}_{13}\text{BrO}_2\text{S}+\text{H}]^+$  312.9898; Found: 312.9892.

#### Ethyl 2-(2-fluorophenyl)-3,6-dihydro-2H-thiopyran-2-carboxylate (4h)

(Spectra)

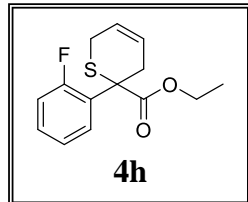

Yield 79%, colourless oil;  $R_f = 0.39$  (9:1 hexanes:ethyl acetate).

IR (neat):  $\nu_{\text{max}} = 2980, 1729, 1485, 1451, 1218, 1093, 1031, 849, 753, 645 \text{ cm}^{-1}$ .

$^1\text{H}$  NMR (400 MHz,  $\text{CDCl}_3$ )  $\delta$  7.53 (td,  $J_1 = 8.0 \text{ Hz}$ ,  $J_2 = 1.6 \text{ Hz}$ , 1H), 7.35-7.29 (m, 1H), 7.16 (td,  $J_1 = 7.6 \text{ Hz}$ ,  $J_2 = 0.8 \text{ Hz}$ , 1H), 7.11-7.06 (m, 1H), 6.02-5.94 (m, 2H), 4.29-4.24 (m, 2H), 3.28-3.23 (m, 1H), 3.07-2.94 (m, 2H), 2.78-2.73 (m, 1H), 1.26 (t,  $J = 7.2 \text{ Hz}$ , 3H) ppm.

$^{13}\text{C}\{^1\text{H}\}$  NMR (101 MHz,  $\text{CDCl}_3$ )  $\delta$  172.1, 160.1 (d,  $J_{\text{C-F}} = 249.6 \text{ Hz}$ ), 129.4 (d,  $J_{\text{C-F}} = 8.9 \text{ Hz}$ ), 128.87 (d,  $J_{\text{C-F}} = 11.7 \text{ Hz}$ ), 127.8 (d,  $J_{\text{C-F}} = 3.5 \text{ Hz}$ ), 126.9, 123.80 (d,  $J_{\text{C-F}} = 3.5 \text{ Hz}$ ), 123.6, 115.95 (d,  $J_{\text{C-F}} = 22.2 \text{ Hz}$ ), 62.0, 50.8, 34.4, 25.5, 14.0 ppm.

HRMS (ESI)  $m/z$ :  $[\text{M}+\text{H}]^+$  Calcd for  $[\text{C}_{14}\text{H}_{15}\text{FO}_2\text{S}+\text{H}]^+$  267.0855; Found: 267.0861.

#### Methyl 2-(4-methylphenyl)-3,6-dihydro-2H-thiopyran-2-carboxylate (4i)

Yield 80%, white solid; mp 88-90 °C;  $R_f = 0.47$  (9:1 hexanes:ethyl acetate).

IR (neat):  $\nu_{\text{max}} = 2949, 1732, 1512, 1437, 1234, 1188, 1034, 816, 745, 650 \text{ cm}^{-1}$ .

**<sup>1</sup>H NMR (400 MHz, CDCl<sub>3</sub>)** δ 7.34-7.32 (m, 2H), 7.09-7.07 (m, 2H), 5.88-5.83 (m, 1H), 5.77-5.74 (m, 1H), 3.64 (s, 3H), 3.25-3.20 (m, 1H), 3.05-2.99 (m, 1H), 2.91-2.84 (m, 2H), 2.26 (s, 3H) ppm.

(Spectra)

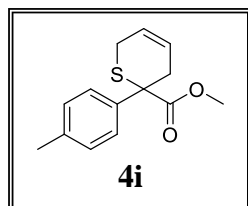

**<sup>13</sup>C{<sup>1</sup>H} NMR (101 MHz, CDCl<sub>3</sub>)** δ 172.9, 137.6, 136.7, 129.3, 126.8, 126.5, 123.7, 54.2, 53.2, 34.7, 26.6, 21.1 ppm.

**HRMS (ESI) *m/z*:** [M+H]<sup>+</sup> Calcd for [C<sub>14</sub>H<sub>16</sub>O<sub>2</sub>S+H]<sup>+</sup> 249.0949; Found: 249.0944.

**Methyl 2-(3-methoxyphenyl)-3,6-dihydro-2H-thiopyran-2-carboxylate (4j)**

(Spectra)

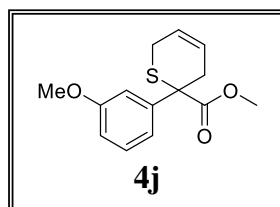

Yield 83%, colourless oil; *R<sub>f</sub>* = 0.31 (9:1 hexanes:ethyl acetate).

**IR (neat):** *v*<sub>max</sub> = 2948, 1728, 1590, 1488, 1430, 1236, 1162, 1035, 778, 737, 692, 650 cm<sup>-1</sup>.

**<sup>1</sup>H NMR (400 MHz, CDCl<sub>3</sub>)** δ 7.32-7.28 (m, 1H), 7.13-7.11 (m, 2H), 6.88-6.85 (m, 1H), 5.99-5.94 (m, 1H), 5.90-5.85 (m, 1H), 3.84 (s, 3H), 3.75 (s, 3H), 3.37-3.30 (m, 1H), 3.16-3.10 (m, 1H), 3.05-2.94 (m, 2H) ppm.

**<sup>13</sup>C{<sup>1</sup>H} NMR (101 MHz, CDCl<sub>3</sub>)** δ 172.7, 159.7, 141.3, 129.5, 126.8, 123.7, 119.0, 113.0, 112.9, 55.3, 54.4, 53.2, 34.7, 26.6 ppm.

**HRMS (ESI) *m/z*:** [M+H]<sup>+</sup> Calcd for [C<sub>14</sub>H<sub>16</sub>O<sub>3</sub>S+H]<sup>+</sup> 265.0898; Found: 265.0903.

**Ethyl 2-(3,4,5-trimethoxyphenyl)-3,6-dihydro-2H-thiopyran-2-carboxylate (4k)**

(Spectra)

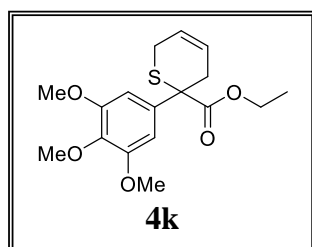

Yield 78%, colourless oil; *R<sub>f</sub>* = 0.14 (9:1 hexanes:ethyl acetate).

**IR (neat):** *v*<sub>max</sub> = 2933, 1726, 1586, 1507, 1456, 1414, 1244, 1188, 1126, 1009, 851, 662 cm<sup>-1</sup>.

**<sup>1</sup>H NMR (400 MHz, CDCl<sub>3</sub>)** δ 6.76 (s, 2H), 5.95-5.92 (m, 1H), 5.87-5.84 (m, 1H), 4.27-4.14 (m, 2H), 3.85 (s, 6H), 3.84 (s, 3H), 3.38-3.33 (m, 1H), 3.15-2.99 (m, 2H), 2.94-2.89 (m, 1H) 1.24 (t, *J* = 7.2 Hz, 3H) ppm.

**<sup>13</sup>C{<sup>1</sup>H} NMR (101 MHz, CDCl<sub>3</sub>)** δ 172.0, 153.0, 137.6, 135.4, 126.8, 123.7, 104.1, 62.0, 60.8, 56.2, 54.5, 34.9, 26.9, 14.1 ppm.

**HRMS (ESI) *m/z*:** [M+H]<sup>+</sup> Calcd for [C<sub>17</sub>H<sub>22</sub>O<sub>5</sub>S+H]<sup>+</sup> 339.1266; Found: 339.1261.

#### Methyl 2-[3-(trifluoromethyl)phenyl]-3,6-dihydro-2*H*-thiopyran-2-carboxylate (**4l**)

(Spectra)

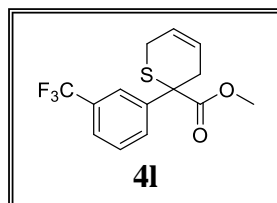

Yield 81%, colourless oil; *R<sub>f</sub>* = 0.47 (9:1 hexanes:ethyl acetate).

**IR (neat):** *v*<sub>max</sub> = 2953, 1732, 1435, 1324, 1232, 1164, 1121, 1077, 1034, 789, 698, 657 cm<sup>-1</sup>.

**<sup>1</sup>H NMR (400 MHz, CDCl<sub>3</sub>)** δ 7.71 (s, 1H), 7.66 (d, *J* = 8.0 Hz, 1H), 7.48 (d, *J* = 8.0 Hz, 1H), 7.42-7.38 (m, 1H), 5.90-5.85 (m, 1H), 5.80-5.75 (m, 1H), 3.66 (s, 3H), 3.23-3.17 (m, 1H), 3.08-3.02 (m, 1H), 2.94-2.81 (m, 2H) ppm.

**<sup>13</sup>C{<sup>1</sup>H} NMR (101 MHz, CDCl<sub>3</sub>)** δ 172.2, 140.8, 130.87 (q, *J*<sub>C-F</sub> = 32.32 Hz), 130.4, 129.0, 128.04-119.91 (q, *J*<sub>C-F</sub> = 273.71 Hz), 126.3, 124.79-124.67 (q, *J*<sub>C-F</sub> = 4.04 Hz), 124.0, 123.78-123.66 (q, *J*<sub>C-F</sub> = 4.04 Hz), 54.1, 53.4, 34.2, 26.4 ppm.

**HRMS (ESI) *m/z*:** [M+H]<sup>+</sup> Calcd for [C<sub>14</sub>H<sub>13</sub>F<sub>3</sub>O<sub>2</sub>S+H]<sup>+</sup> 303.0667; Found: 303.0665.

#### Ethyl 2-(4-nitrophenyl)-3,6-dihydro-2*H*-thiopyran-2-carboxylate (**4m**)

(Spectra)

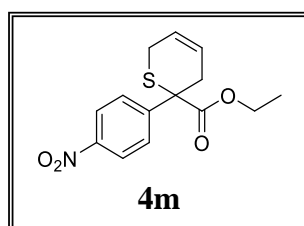

Yield 75%, colourless oil; *R<sub>f</sub>* = 0.30 (9:1 hexanes:ethyl acetate).

**IR (neat):** *v*<sub>max</sub> = 2981, 1729, 1600, 1521, 1348, 1228, 1033, 857, 736, 649 cm<sup>-1</sup>.

**<sup>1</sup>H NMR (400 MHz, CDCl<sub>3</sub>)** δ 8.13-8.11 (m, 2H), 7.66-7.64 (m, 2H), 5.90-5.87 (m, 1H), 5.80-5.77 (m, 1H), 4.23-4.07 (m, 2H), 3.19-3.14 (m, 1H), 3.06-2.91 (m, 2H), 2.83-2.79 (m, 1H), 1.14 (t, *J* = 7.2 Hz, 3H) ppm.

**<sup>13</sup>C{<sup>1</sup>H} NMR (101 MHz, CDCl<sub>3</sub>)** δ 171.2, 147.2, 147.1, 128.1, 126.1, 124.2, 123.5, 62.5, 54.3, 33.9, 26.2, 13.9 ppm.

**HRMS (ESI)  $m/z$ :**  $[M+H]^+$  Calcd for  $[C_{14}H_{15}NO_4S+H]^+$  294.0800; Found: 294.0791.

**Methyl 2-(naphthalen-1-yl)-3,6-dihydro-2H-thiopyran-2-carboxylate (4n)**

(Spectra)

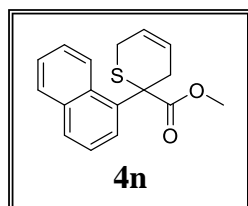

Yield 79%, white solid; mp 126-128 °C;  $R_f$  = 0.33 (9:1 hexanes:ethyl acetate).

**IR (neat):**  $\nu_{max}$  = 2921, 1726, 1433, 1228, 1195, 1032, 778, 732, 645  $cm^{-1}$ .

**$^1H$  NMR (400 MHz,  $CDCl_3$ )**  $\delta$  8.15-8.13 (m, 1H), 7.80-7.77 (m, 1H), 7.73-7.71 (m, 1H), 7.51-7.49 (m, 1H), 7.43-7.38 (m, 2H), 7.37-7.31 (m, 1H), 5.96-5.93 (m, 1H), 5.87-5.81 (m, 1H), 3.56 (s, 3H), 3.12-3.06 (m, 2H), 3.01-2.95 (m, 1H), 2.71-2.65 (m, 1H) ppm.

**$^{13}C\{^1H\}$  NMR (101 MHz,  $CDCl_3$ )**  $\delta$  174.7, 134.8, 134.6, 130.8, 129.3, 129.2, 126.5, 126.0, 125.5, 125.0, 124.7, 124.6, 124.0, 53.9, 53.2, 36.0, 25.9 ppm.

**HRMS (ESI)  $m/z$ :**  $[M+Na]^+$  Calcd for  $[C_{17}H_{16}O_2S+Na]^+$  307.0769; Found: 307.0771.

**Methyl 2-(thiophen-3-yl)-3,6-dihydro-2H-thiopyran-2-carboxylate (4o)**

(Spectra)

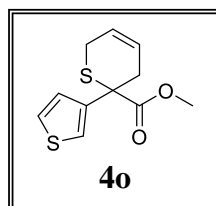

Yield 84%, colourless oil;  $R_f$  = 0.38 (9:1 hexanes:ethyl acetate).

**IR (neat):**  $\nu_{max}$  = 2949, 1728, 1433, 1219, 1086, 1033, 857, 775, 729, 646  $cm^{-1}$ .

**$^1H$  NMR (400 MHz,  $CDCl_3$ )**  $\delta$  7.33-7.30 (m, 2H), 7.24-7.23 (m, 1H), 5.98-5.92 (m, 1H), 5.89-5.84 (m, 1H), 3.77 (s, 3H), 3.34-3.28 (m, 1H), 3.19-3.13 (m, 1H), 3.04-2.94 (m, 2H) ppm.

**$^{13}C\{^1H\}$  NMR (101 MHz,  $CDCl_3$ )**  $\delta$  172.3, 140.5, 126.7, 126.5, 125.9, 123.6, 122.6, 53.3, 51.4, 35.0, 26.5 ppm.

**HRMS (ESI)  $m/z$ :**  $[M+H]^+$  Calcd for  $[C_{11}H_{12}O_2S_2+H]^+$  241.0357; Found: 241.0349.

**(2S)-2-Methylbutyl 2-(4-chlorophenyl)-3,6-dihydro-2H-thiopyran-2-carboxylate (4p)**

(Spectra)

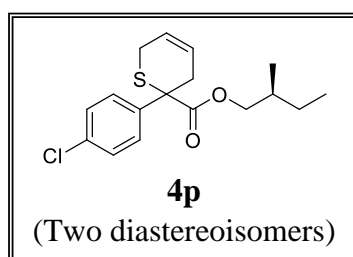

Yield 84%, *dr* 1.5:1, colourless oil;  $R_f = 0.56$  (9:1 hexanes:ethyl acetate);  $[\alpha]_D^{26} = -2.0$  (*c* 0.085,  $\text{CHCl}_3$ ).

**IR** (neat):  $\nu_{\text{max}} = 2964, 2928, 1730, 1492, 1462, 1225, 1096, 1020, 814, 761, 645 \text{ cm}^{-1}$ .

**$^1\text{H}$  NMR (400 MHz,  $\text{CDCl}_3$ )**  $\delta$  7.43-7.40 (m, 2H), 7.24-7.19 (m, 2H), 5.87-5.82 (m, 1H), 5.77-5.72 (m, 1H), 3.93-3.80 (m, 2H), 3.19-3.15 (m, 1H), 3.04-2.98 (m, 1H), 2.92-2.81 (m, 2H), 1.64-1.52 (m, 1H), 1.29-1.17 (m, 1H), 1.09-0.97 (m, 1H), 0.78-0.74 (m, 6H) ppm.

**$^{13}\text{C}\{^1\text{H}\}$  NMR (101 MHz,  $\text{CDCl}_3$ )**  $\delta$  171.9, 138.3, 133.6, 128.5, 128.4, 126.41, 126.40, 124.0, 70.6, 54.1, 34.1, 34.05, 34.04, 26.4, 25.89, 25.86, 16.29, 16.27, 11.15, 11.13 ppm.

**HRMS (ESI)  $m/z$ :**  $[\text{M}+\text{H}]^+$  Calcd for  $[\text{C}_{17}\text{H}_{21}\text{ClO}_2\text{S}+\text{H}]^+$  325.1029; Found: 325.1024.

**(1*R*,2*S*,5*R*)-5-Methyl-2-(propan-2-yl)cyclohexyl-2-(3-chlorophenyl)-3,6-dihydro-2*H*-thiopyran-2-carboxylate (4q)**

(Spectra)

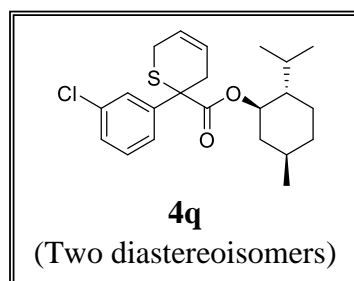

Yield 76%, *dr* 1.4:1, colourless oil;  $R_f = 0.59$  (9:1 hexanes:ethyl acetate);  $[\alpha]_D^{27} = -82.1$  (*c* 0.234,  $\text{CHCl}_3$ ).

**IR** (neat):  $\nu_{\text{max}} = 2953, 2925, 2867, 1723, 1457, 1230, 1188, 1088, 1022, 989, 956, 772, 691, 649 \text{ cm}^{-1}$ .

**$^1\text{H}$  NMR (400 MHz,  $\text{CDCl}_3$ )**  $\delta$  7.52 (s, 1H), 7.42-7.40 (m, 1H), 7.26-7.24 (m, 2H), 5.94-5.91 (m, 1H), 5.86-5.83 (m, 1H), 4.68-4.61 (m, 1H), 3.31-3.22 (m, 1H), 3.12-2.87 (m, 3H), 1.93-1.89 (m, 1H), 1.66-1.62 (m, 2H), 1.46-1.42 (m, 1H), 1.39-1.30 (m, 1H), 1.28-1.26 (m, 1H), 1.01-0.87 (m, 5H), 0.84-0.70 (m, 4H), 0.64-0.56 (m, 3H) ppm.

**$^{13}\text{C}\{^1\text{H}\}$  NMR (101 MHz,  $\text{CDCl}_3$ )**  $\delta$  171.2, 142.1, 142.0, 134.32, 134.29, 129.6, 129.5, 127.9, 127.8, 127.3, 127.1, 126.6, 126.2, 125.1, 124.9, 124.3, 123.8, 76.3, 76.2, 54.4, 54.3, 47.0, 46.8, 40.3, 40.1, 34.4, 34.2, 34.1, 33.7, 31.4, 26.5, 26.3, 25.8, 25.7, 23.1, 22.9, 22.0, 20.8, 20.6, 15.8, 15.7 ppm.

**HRMS (ESI)  $m/z$ :**  $[\text{M}+\text{H}]^+$  Calcd for  $[\text{C}_{22}\text{H}_{29}\text{ClO}_2\text{S}+\text{H}]^+$  393.1655; Found: 393.1660.

**Prop-2-en-1-yl 2-phenyl-3,6-dihydro-2*H*-thiopyran-2-carboxylate (4r)**

(Spectra)

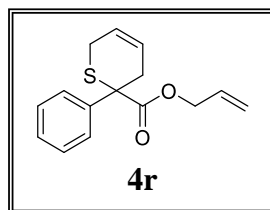

Yield 79%, colourless oil;  $R_f = 0.43$  (9:1 hexanes:ethyl acetate).

**IR** (neat):  $\nu_{\max} = 2932, 1729, 1446, 1218, 1027, 992, 934, 730, 697, 651 \text{ cm}^{-1}$ .

**$^1\text{H}$  NMR (400 MHz,  $\text{CDCl}_3$ )**  $\delta$  7.47-7.45 (m, 2H), 7.28-7.25 (m, 2H), 7.22-7.19 (m, 1H), 5.88-5.85 (m, 1H), 5.80-5.71 (m, 2H), 5.16-5.08 (m, 2H), 4.54 (d,  $J = 5.6 \text{ Hz}$ , 2H), 3.25-3.21 (m, 1H), 3.08-3.03 (m, 1H), 2.92-2.86 (m, 2H) ppm.

**$^{13}\text{C}\{^1\text{H}\}$  NMR (101 MHz,  $\text{CDCl}_3$ )**  $\delta$  171.9, 139.7, 131.6, 128.5, 127.8, 126.8, 126.7, 123.8, 118.4, 66.3, 54.5, 34.6, 26.6 ppm.

**HRMS (ESI)  $m/z$ :**  $[\text{M}+\text{H}]^+$  Calcd for  $[\text{C}_{15}\text{H}_{16}\text{O}_2\text{S}+\text{H}]^+$  261.0949; Found: 261.0959.

#### 1-Benzyl-3',6'-dihydrospiro[indole-3,2'-thiopyran]-2(1H)-one (4s)

(Spectra)

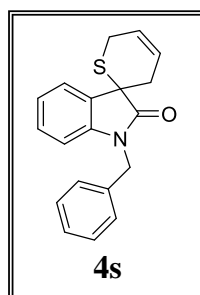

Yield 88%, colourless oil;  $R_f = 0.24$  (9:1 hexanes:ethyl acetate).

**IR** (neat):  $\nu_{\max} = 2923, 1708, 1608, 1489, 1463, 1350, 1167, 747, 695, 651 \text{ cm}^{-1}$ .

**$^1\text{H}$  NMR (400 MHz,  $\text{CDCl}_3$ )**  $\delta$  7.26-7.16 (m, 6H), 7.13-7.09 (m, 1H), 6.98-6.94 (m, 1H), 6.64 (d,  $J = 8.0 \text{ Hz}$ , 1H), 6.09-6.03 (m, 1H), 5.96-5.91 (m, 1H), 4.84 (ABq,  $\Delta\delta_{\text{AB}} = 0.14$ ,  $J_{\text{AB}} = 15.6 \text{ Hz}$ , 2H), 3.91-3.84 (m, 1H), 3.16-3.10 (m, 1H), 2.69-2.50 (m, 2H) ppm.

**$^{13}\text{C}\{^1\text{H}\}$  NMR (101 MHz,  $\text{CDCl}_3$ )**  $\delta$  176.7, 141.8, 135.8, 131.1, 129.0, 128.9, 127.6, 127.2, 125.1, 123.8, 123.6, 122.8, 109.3, 45.0, 43.6, 31.0, 25.0 ppm.

**HRMS (ESI)  $m/z$ :**  $[\text{M}+\text{H}]^+$  Calcd for  $[\text{C}_{19}\text{H}_{17}\text{NOS}+\text{H}]^+$  308.1109; Found: 308.1105.

#### Methyl (2S,3S)-3-methyl-2-phenyl-3,6-dihydro-2H-thiopyran-2-carboxylate (4u1)

(Spectra)

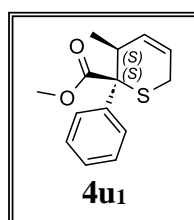

Yield 55%, white crystalline solid; mp 98-100 °C;  $R_f = 0.43$  (19:1 hexanes:ethyl acetate).



**IR** (neat):  $\nu_{\max}$  = 2924, 1734, 1449, 1238, 1198, 1039, 737, 702  $\text{cm}^{-1}$ .

**$^1\text{H}$  NMR (400 MHz,  $\text{CDCl}_3$ )**  $\delta$  7.55 (d,  $J$  = 7.6 Hz, 2H), 7.32-7.29 (m, 2H), 7.26-7.22 (m, 1H), 5.92-5.88 (m, 1H), 5.70-5.66 (m, 1H), 3.67 (s, 3H), 3.25-3.21 (m, 1H), 2.76 (dd,  $J_1$  = 17.6 Hz,  $J_2$  = 6.0 Hz, 1H), 2.52 (dd,  $J_1$  = 17.6 Hz,  $J_2$  = 2.0 Hz, 1H), 1.24 (d,  $J$  = 6.8 Hz, 3H) ppm.

**$^{13}\text{C}\{^1\text{H}\}$  NMR (101 MHz,  $\text{CDCl}_3$ )**  $\delta$  172.7, 140.0, 132.3, 128.1, 127.6, 127.3, 123.6, 61.1, 52.8, 33.9, 25.5, 18.4 ppm.

**HRMS (ESI)**  $m/z$ :  $[\text{M}+\text{H}]^+$  Calcd for  $[\text{C}_{14}\text{H}_{16}\text{O}_2\text{S}+\text{H}]^+$  249.0949; Found: 249.0955.

### Methyl 3-methyl-2-phenyl-3,6-dihydro-2H-thiopyran-2-carboxylate (**4u<sub>2</sub>**)

(Spectra)

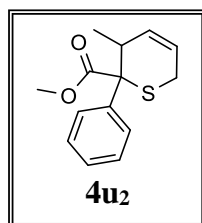

Yield 34%, colourless liquid;  $R_f$  = 0.37 (19:1 hexanes:ethyl acetate).

**IR** (neat):  $\nu_{\max}$  = 2932, 1727, 1448, 1231, 1014, 749, 702  $\text{cm}^{-1}$ .

**$^1\text{H}$  NMR (400 MHz,  $\text{CDCl}_3$ )**  $\delta$  7.40-7.33 (m, 4H), 7.30-7.29 (m, 1H), 5.96-5.92 (m, 1H), 5.79-5.75 (m, 1H), 3.69 (s, 3H), 3.39 (dd,  $J_1$  = 17.6 Hz,  $J_2$  = 2.0 Hz, 1H), 3.29-3.29 (m, 1H), 3.08 (dd,  $J_1$  = 18.0 Hz,  $J_2$  = 5.6 Hz, 1H), 0.80 (d,  $J$  = 6.8 Hz, 3H) ppm.

**$^{13}\text{C}\{^1\text{H}\}$  NMR (101 MHz,  $\text{CDCl}_3$ )**  $\delta$  173.5, 138.8, 134.7, 128.6, 127.7, 126.2, 120.9, 59.8, 53.2, 36.8, 26.7, 16.9 ppm.

**HRMS (ESI)**  $m/z$ :  $[\text{M}+\text{H}]^+$  Calcd for  $[\text{C}_{14}\text{H}_{16}\text{O}_2\text{S}+\text{H}]^+$  249.0949; Found: 249.0946.

### 6. Synthetic procedure for the reduction of thiopyran **4b**

3,6-Dihydro-2H-thiopyran **4b** (0.02 g, 0.09 mmol) and 10% palladium on carbon (0.009 g, 0.009 mmol) were dissolved in dry ethyl acetate (2 mL) and stirred under an atmosphere of hydrogen (balloon pressure) for 17 h. The reaction mixture was then filtered through a short pad of Celite® and the filtrate was concentrated *in vacuo*. The NMR analysis of the crude without additional purification yields pure tetrahydro-2H-thiopyran **6a** (0.02 g, 99%) as a colourless oil.

### Methyl 2-phenylthiane-2-carboxylate (**6a**)

(Spectra)

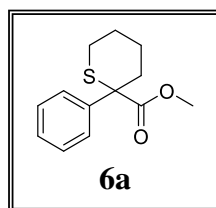

Yield 98%, colourless oil;  $R_f = 0.40$  (9:1 hexanes:ethyl acetate).

**IR** (neat):  $\nu_{\max} = 2931, 1728, 1493, 1439, 1259, 1221, 1177, 1136, 1061, 1030, 997, 728, 697$   $\text{cm}^{-1}$ .

**$^1\text{H}$  NMR (400 MHz,  $\text{CDCl}_3$ )**  $\delta$  7.47 (d,  $J = 7.6$  Hz, 2H), 7.30-7.26 (m, 2H), 7.22-7.18 (m, 1H), 3.63 (s, 3H), 2.80-2.73 (m, 1H), 2.61-2.49 (m, 2H), 2.38-2.31 (m, 1H), 1.84-1.78 (m, 1H), 1.73-1.59 (m, 2H), 1.57-1.48 (m, 1H) ppm.

**$^{13}\text{C}\{^1\text{H}\}$  NMR (101 MHz,  $\text{CDCl}_3$ )**  $\delta$  173.2, 140.2, 128.7, 127.7, 126.7, 56.5, 53.0, 36.1, 28.8, 26.2, 23.1 ppm.

**HRMS (ESI)  $m/z$ :**  $[\text{M}+\text{H}]^+$  Calcd for  $[\text{C}_{13}\text{H}_{16}\text{O}_2\text{S}+\text{H}]^+$  237.0949; Found: 237.0941.

## 7. Synthetic procedure for the oxidation of thiopyran 4f

To a solution of thiopyran **4f** (0.02 g, 0.06 mmol) in dichloromethane (DCM) 2 mL was added *m*-Chloroperbenzoic acid (*m*-CPBA) (2 equiv) and the mixture was stirred at room temperature for 3 h. Reaction was monitored using TLC. After completion of the reaction, the reaction was quenched with saturated  $\text{NaHCO}_3$  solution and extracted with DCM. The combined organic layers were dried over  $\text{Na}_2\text{SO}_4$ , concentrated, and purified by flash chromatography using silica gel (230-400 mesh; Hexanes:EtOAc = 6:4) to provide the product **6b** (0.018 g, 82%) as a white solid.

### 2-Methylpropyl 2-(4-chlorophenyl)-1,1-dioxo-1,2,3,6-tetrahydro-1 $\lambda$ 6-thiopyran-2-carboxylate (**6b**)

(Spectra)

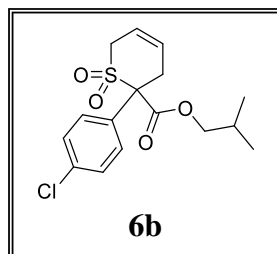

Yield 82%, white solid, mp 106-108 °C;  $R_f = 0.13$  (9:1 hexanes:ethyl acetate).

**IR** (neat):  $\nu_{\max} = 2963, 2928, 1734, 1494, 1318, 1281, 1208, 1155, 1128, 1097, 1039, 1018, 846, 740, 654$   $\text{cm}^{-1}$ .

**$^1\text{H}$  NMR (400 MHz,  $\text{CDCl}_3$ )**  $\delta$  7.46-7.43 (m, 2H), 7.35-7.32 (m, 2H), 5.95-5.90 (m, 1H), 5.63-5.59 (m, 1H), 4.02-3.87 (m, 3H), 3.55-3.50 (m, 2H), 3.27-3.21 (m, 1H), 1.90-1.80 (m, 1H), 0.79 (dd,  $J_1 = 6.8$  Hz,  $J_2 = 2.8$  Hz, 6H) ppm.

**$^{13}\text{C}\{^1\text{H}\}$  NMR (101 MHz,  $\text{CDCl}_3$ )**  $\delta$  167.6, 136.1, 130.2, 129.0, 127.6, 125.6, 120.9, 72.7, 71.6, 51.3, 34.3, 27.6, 18.9 ppm.

**HRMS (ESI)  $m/z$ :**  $[\text{M}+\text{Na}]^+$  Calcd for  $[\text{C}_{16}\text{H}_{19}\text{ClO}_4\text{S}+\text{Na}]^+$  365.0590; Found: 365.0600.

## 8. Crystal data and structure refinement for compound 4b

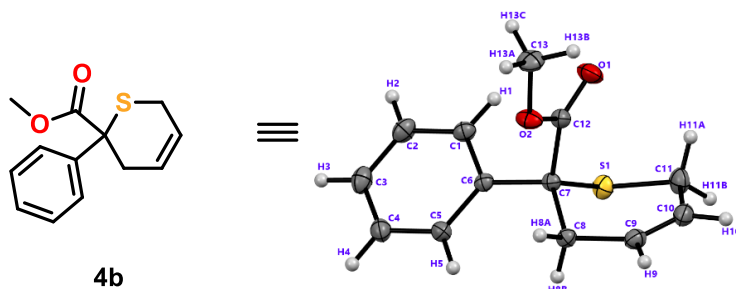

**Figure S1.** ORTEP diagram of compound **4b** showing thermal ellipsoids at the 50% probability level

**Table S2.** Crystal data and structure refinement for **4b**

|                                         |                                                   |
|-----------------------------------------|---------------------------------------------------|
| CCDC                                    | 2332011                                           |
| Empirical formula                       | C <sub>13</sub> H <sub>14</sub> O <sub>2</sub> S  |
| Formula weight                          | 234.30                                            |
| Temperature/K                           | 159.(2)                                           |
| Crystal system                          | Monoclinic                                        |
| Space group                             | <i>P</i> 1 2 <sub>1</sub> / <i>n</i> 1            |
| a (Å)                                   | 7.8862(3)                                         |
| b (Å)                                   | 10.3502(4)                                        |
| c (Å)                                   | 14.3311(5)                                        |
| α (°)                                   | 90                                                |
| β (°)                                   | 103.6680(10)                                      |
| γ (°)                                   | 90                                                |
| Volume (Å <sup>3</sup> )                | 1136.63(7)                                        |
| Z                                       | 4                                                 |
| ρ <sub>calc</sub> (g cm <sup>-3</sup> ) | 1.369                                             |
| μ (mm <sup>-1</sup> )                   | 0.266                                             |
| F(000)                                  | 496                                               |
| Crystal size (mm)                       | 0.560 (max) × 0.175 (mid) × 0.156 (min)           |
| Radiation                               | MoKα (λ = 0.71073 Å)                              |
| Theta range for data collection (°)     | 2.45 to 39.44                                     |
| Index ranges                            | -14 ≤ h ≤ 14, -18 ≤ k ≤ 18, -25 ≤ l ≤ 25          |
| Reflections collected / unique          | 39684 / 6788 [R <sub>int</sub> = 0.0606]          |
| Completeness to theta = 39.44           | 99.8 %                                            |
| Absorption correction                   | Semi-empirical from equivalents                   |
| Max. and min. transmission              | 0.960 and 0.865                                   |
| Refinement method                       | Full-matrix least-squares on F <sup>2</sup>       |
| Data/restraints/parameters              | 6788/0/201                                        |
| Goodness-of-fit on F <sup>2</sup>       | 1.081                                             |
| Final R indices [I > 2σ (I)]            | R <sub>1</sub> = 0.0432, wR <sub>2</sub> = 0.1040 |

|                                                      |                                  |
|------------------------------------------------------|----------------------------------|
| R indices [all data]                                 | $R_1 = 0.0790$ , $wR_2 = 0.1278$ |
| Largest diff. peak and hole ( $e \text{ \AA}^{-3}$ ) | 0.532 and -0.373                 |

**Table S3:** Atomic parameters of compound **4b**

| Atom | Wyck. | Site | x/a         | y/b         | z/c         | U [ $\text{\AA}^2$ ] |
|------|-------|------|-------------|-------------|-------------|----------------------|
| S1   | 4e    | 1    | 0.99211(3)  | 0.72849(3)  | 0.61740(2)  |                      |
| O1   | 4e    | 1    | 0.64990(12) | 0.86700(8)  | 0.59284(6)  |                      |
| O2   | 4e    | 1    | 0.49251(9)  | 0.73631(8)  | 0.48104(6)  |                      |
| C1   | 4e    | 1    | 0.86710(13) | 0.86232(9)  | 0.41580(7)  |                      |
| C2   | 4e    | 1    | 0.90770(14) | 0.90233(11) | 0.33116(8)  |                      |
| C3   | 4e    | 1    | 0.91552(14) | 0.81250(12) | 0.26020(8)  |                      |
| C4   | 4e    | 1    | 0.88323(14) | 0.68325(11) | 0.27454(7)  |                      |
| C5   | 4e    | 1    | 0.84248(13) | 0.6427(1)   | 0.35925(7)  |                      |
| C6   | 4e    | 1    | 0.83450(11) | 0.73179(9)  | 0.43094(6)  |                      |
| C7   | 4e    | 1    | 0.79431(11) | 0.69241(8)  | 0.52603(6)  |                      |
| C8   | 4e    | 1    | 0.75089(12) | 0.54813(9)  | 0.53294(7)  |                      |
| C9   | 4e    | 1    | 0.73054(14) | 0.51172(10) | 0.63135(7)  |                      |
| C10  | 4e    | 1    | 0.80421(14) | 0.57137(11) | 0.71326(8)  |                      |
| C11  | 4e    | 1    | 0.92022(16) | 0.68689(12) | 0.72419(8)  |                      |
| C12  | 4e    | 1    | 0.64094(12) | 0.77608(9)  | 0.53975(7)  |                      |
| C13  | 4e    | 1    | 0.33815(15) | 0.81133(13) | 0.48187(10) |                      |
| H1   | 4e    | 1    | 0.863(2)    | 0.9215(16)  | 0.4656(11)  | 0.028(4)             |
| H2   | 4e    | 1    | 0.932(2)    | 0.9899(18)  | 0.3229(12)  | 0.039(5)             |
| H3   | 4e    | 1    | 0.942(2)    | 0.8370(18)  | 0.2031(14)  | 0.043(5)             |
| H4   | 4e    | 1    | 0.888(2)    | 0.6212(16)  | 0.2260(12)  | 0.033(4)             |
| H5   | 4e    | 1    | 0.8261(19)  | 0.5527(16)  | 0.3674(11)  | 0.028(4)             |
| H9   | 4e    | 1    | 0.663(2)    | 0.4346(16)  | 0.6341(12)  | 0.032(4)             |
| H8A  | 4e    | 1    | 0.6489(19)  | 0.5294(15)  | 0.4856(11)  | 0.024(4)             |
| H8B  | 4e    | 1    | 0.8383(19)  | 0.4969(15)  | 0.5188(11)  | 0.024(4)             |
| H10  | 4e    | 1    | 0.780(2)    | 0.5374(17)  | 0.7718(11)  | 0.032(4)             |
| H11A | 4e    | 1    | 0.869(2)    | 0.7627(16)  | 0.7450(13)  | 0.032(4)             |
| H11B | 4e    | 1    | 1.028(2)    | 0.6734(18)  | 0.7741(13)  | 0.039(4)             |
| H13A | 4e    | 1    | 0.245(2)    | 0.7751(17)  | 0.4365(13)  | 0.038(5)             |
| H13B | 4e    | 1    | 0.316(2)    | 0.8081(19)  | 0.5439(14)  | 0.042(5)             |
| H13C | 4e    | 1    | 0.354(2)    | 0.8999(18)  | 0.4631(12)  | 0.038(4)             |

**Table S4:** Anisotropic displacement parameters, in  $\text{\AA}^2$  of compound **4b**

| Atom | U11         | U22         | U33         | U12         | U13         | U23         |
|------|-------------|-------------|-------------|-------------|-------------|-------------|
| S1   | 0.01836(10) | 0.02458(12) | 0.02047(11) | -0.00353(8) | -0.00021(8) | -0.00113(8) |
| O1   | 0.0328(4)   | 0.0267(4)   | 0.0296(4)   | 0.0065(3)   | 0.0042(3)   | -0.0108(3)  |
| O2   | 0.0153(3)   | 0.0246(3)   | 0.0317(4)   | 0.0034(2)   | 0.0024(3)   | -0.0056(3)  |
| C1   | 0.0210(4)   | 0.0179(4)   | 0.0240(4)   | -0.0012(3)  | 0.0047(3)   | 0.0001(3)   |
| C2   | 0.0245(4)   | 0.0238(4)   | 0.0290(5)   | -0.0029(4)  | 0.0061(4)   | 0.0063(4)   |

| Atom | U11       | U22       | U33       | U12        | U13       | U23        |
|------|-----------|-----------|-----------|------------|-----------|------------|
| C3   | 0.0217(4) | 0.0348(5) | 0.0231(4) | -0.0004(4) | 0.0064(3) | 0.0062(4)  |
| C4   | 0.0248(4) | 0.0298(5) | 0.0197(4) | 0.0033(4)  | 0.0059(3) | 0.0004(4)  |
| C5   | 0.0232(4) | 0.0194(4) | 0.0187(4) | 0.0019(3)  | 0.0044(3) | -0.0011(3) |
| C6   | 0.0139(3) | 0.0166(3) | 0.0175(3) | 0.0002(3)  | 0.0023(3) | 0.0002(3)  |
| C7   | 0.0148(3) | 0.0154(3) | 0.0171(3) | -0.0003(3) | 0.0019(3) | -0.0013(3) |
| C8   | 0.0173(3) | 0.0164(3) | 0.0186(4) | -0.0008(3) | 0.0035(3) | 0.0005(3)  |
| C9   | 0.0235(4) | 0.0194(4) | 0.0244(4) | 0.0015(3)  | 0.0071(3) | 0.0031(3)  |
| C10  | 0.0262(4) | 0.0268(5) | 0.0209(4) | 0.0039(4)  | 0.0063(3) | 0.0038(3)  |
| C11  | 0.0285(5) | 0.0318(5) | 0.0179(4) | -0.0015(4) | 0.0003(4) | -0.0018(4) |
| C12  | 0.0191(4) | 0.0168(3) | 0.0184(4) | 0.0012(3)  | 0.0049(3) | -0.0001(3) |
| C13  | 0.0197(4) | 0.0311(5) | 0.0360(6) | 0.0084(4)  | 0.0076(4) | 0.0018(4)  |

**Table S5:** Bond lengths [Å] for **4b**

| Atoms 1,2 | d 1,2 [Å]   | Atoms 1,2           | d 1,2 [Å]   |
|-----------|-------------|---------------------|-------------|
| S1—C11    | 1.8053(13)  | C6—C7               | 1.5257(13)  |
| S1—C7     | 1.8226(8)   | C7—C12              | 1.5375(13)  |
| O1—C12    | 1.2017(13)  | C7—C8               | 1.5405(13)  |
| O2—C12    | 1.3350(11)  | C8—C9               | 1.5046(15)  |
| O2—C13    | 1.4463(15)  | C8—H8A              | 0.9418(135) |
| C1—C2     | 1.3888(16)  | C8—H8B              | 0.9292(161) |
| C1—C6     | 1.4017(13)  | C9—C10              | 1.3320(14)  |
| C1—H1     | 0.9468(165) | C9—H9               | 0.9656(166) |
| C2—C3     | 1.3900(17)  | C10—C11             | 1.4911(17)  |
| C2—H2     | 0.9397(186) | C10—H10             | 0.9693(170) |
| C3—C4     | 1.3862(17)  | C11—H11A            | 0.9616(174) |
| C3—H3     | 0.9264(207) | C11—H11B            | 0.9830(149) |
| C4—C5     | 1.3920(15)  | C13—H13A            | 0.9366(154) |
| C4—H4     | 0.9540(173) | C13—H13B            | 0.9462(208) |
| C5—C6     | 1.3930(14)  | C13—H13C            | 0.9717(187) |
| C5—H5     | 0.9514(166) | C3—C10 <sup>i</sup> | 10.7191(15) |

(i) 1/2-x, 1/2+y, 1/2-z.

**Table S6:** Bond Angles [°] for **4b**

| Atoms 1,2,3 | Angle 1,2,3 [°] | Atoms 1,2,3  | Angle 1,2,3 [°] |
|-------------|-----------------|--------------|-----------------|
| C11—S1—C7   | 99.978(47)      | C9—C8—H8A    | 111.198(936)    |
| C12—O2—C13  | 116.337(84)     | C7—C8—H8A    | 108.555(947)    |
| C2—C1—C6    | 120.74(9)       | C9—C8—H8B    | 108.085(951)    |
| C2—C1—H1    | 121.427(941)    | C7—C8—H8B    | 110.581(961)    |
| C6—C1—H1    | 117.818(1004)   | H8A—C8—H8B   | 106.066(1340)   |
| C1—C2—C3    | 119.919(101)    | C10—C9—C8    | 126.089(93)     |
| C1—C2—H2    | 119.577(1056)   | C10—C9—H9    | 118.497(989)    |
| C3—C2—H2    | 120.491(1109)   | C8—C9—H9     | 115.301(989)    |
| C4—C3—C2    | 119.710(109)    | C9—C10—C11   | 126.387(104)    |
| C4—C3—H3    | 118.866(1150)   | C9—C10—H10   | 117.419(918)    |
| C2—C3—H3    | 121.424(1178)   | C11—C10—H10  | 116.192(1006)   |
| C3—C4—C5    | 120.574(100)    | C10—C11—S1   | 114.204(85)     |
| C3—C4—H4    | 120.086(1001)   | C10—C11—H11A | 113.241(994)    |
| C5—C4—H4    | 119.338(1004)   | S1—C11—H11A  | 107.901(1043)   |

| Atoms 1,2,3 | Angle 1,2,3 [°] | Atoms 1,2,3   | Angle 1,2,3 [°] |
|-------------|-----------------|---------------|-----------------|
| C4—C5—C6    | 120.241(89)     | C10—C11—H11B  | 111.477(1017)   |
| C4—C5—H5    | 117.924(953)    | S1—C11—H11B   | 105.068(1050)   |
| C6—C5—H5    | 121.768(983)    | H11A—C11—H11B | 104.158(1447)   |
| C5—C6—C1    | 118.813(87)     | O1—C12—O2     | 123.514(94)     |
| C5—C6—C7    | 122.484(78)     | O1—C12—C7     | 126.279(89)     |
| C1—C6—C7    | 118.696(78)     | O2—C12—C7     | 110.173(79)     |
| C6—C7—C12   | 107.427(72)     | O2—C13—H13A   | 107.634(1019)   |
| C6—C7—C8    | 114.370(72)     | O2—C13—H13B   | 109.351(1047)   |
| C12—C7—C8   | 110.137(71)     | H13A—C13—H13B | 110.453(1596)   |
| C6—C7—S1    | 105.296(57)     | O2—C13—H13C   | 109.915(1035)   |
| C12—C7—S1   | 110.996(62)     | H13A—C13—H13C | 108.458(1477)   |
| C8—C7—S1    | 108.538(60)     | H13B—C13—H13C | 110.965(1537)   |
| C9—C8—C7    | 112.186(78)     |               |                 |

**Table S7.** Torsion angles [°] for **4b**

|                       |            |
|-----------------------|------------|
| C(11)-S(1)-C(7)-C(6)  | 176.62(6)  |
| C(11)-S(1)-C(7)-C(8)  | -60.49(7)  |
| C(11)-S(1)-C(7)-C(12) | 60.68(7)   |
| C(7)-S(1)-C(11)-C(10) | 37.73(9)   |
| C(13)-O(2)-C(12)-O(1) | 1.6(1)     |
| C(13)-O(2)-C(12)-C(7) | -176.38(8) |
| C(6)-C(1)-C(2)-C(3)   | 0.3(2)     |
| C(2)-C(1)-C(6)-C(5)   | -0.4(1)    |
| C(2)-C(1)-C(6)-C(7)   | 178.70(9)  |
| C(1)-C(2)-C(3)-C(4)   | -0.2(2)    |
| C(2)-C(3)-C(4)-C(5)   | 0.2(2)     |
| C(3)-C(4)-C(5)-C(6)   | -0.3(2)    |
| C(4)-C(5)-C(6)-C(1)   | 0.4(1)     |
| C(4)-C(5)-C(6)-C(7)   | -178.66(9) |
| C(1)-C(6)-C(7)-S(1)   | -64.06(9)  |
| C(1)-C(6)-C(7)-C(8)   | 176.88(8)  |
| C(1)-C(6)-C(7)-C(12)  | 54.3(1)    |
| C(5)-C(6)-C(7)-S(1)   | 114.99(9)  |
| C(5)-C(6)-C(7)-C(8)   | -4.1(1)    |
| C(5)-C(6)-C(7)-C(12)  | -126.64(9) |
| S(1)-C(7)-C(8)-C(9)   | 56.90(9)   |
| C(6)-C(7)-C(8)-C(9)   | 174.12(8)  |
| C(12)-C(7)-C(8)-C(9)  | -64.8(1)   |
| S(1)-C(7)-C(12)-O(1)  | 10.7(1)    |
| S(1)-C(7)-C(12)-O(2)  | -171.43(6) |
| C(6)-C(7)-C(12)-O(1)  | -104.0(1)  |
| C(6)-C(7)-C(12)-O(2)  | 73.95(9)   |
| C(8)-C(7)-C(12)-O(1)  | 130.9(1)   |
| C(8)-C(7)-C(12)-O(2)  | -51.2(1)   |
| C(7)-C(8)-C(9)-C(10)  | -26.0(1)   |
| C(8)-C(9)-C(10)-C(11) | 0.6(2)     |
| C(9)-C(10)-C(11)-S(1) | -11.0(2)   |

Symmetry transformations used to generate equivalent atoms:

The following intermolecular interactions are present in compound **4b**

The molecules of compound **4b** was aligned involving a sulfur-arene (sulfur- $\pi$ )<sup>11,12</sup> and three C-H---O intermolecular interactions.

- (i) S1--- $\pi$  (sulfur-  $\pi$ )  
Distance S1---C4(ring edge) = 3.484 Å  
Distance S1---centroid:C1-C6 = 3.890 Å  
Angle S1---cenroid:C1-C6---C4(ring plane) = 62.89°
- (ii) C9-H9---O2  
Distance H9---O2 = 2.530 Å; Angle C9-H9---O2 = 137.61°
- (iii) C10-H10---O1  
Distance H10---O1 = 2.583 Å; Angle C10-H10---O1 = 147.85°
- (iv) C13-H13C---O1  
Distance H13C---O1 = 2.540 Å; Angle C13-H13C---O1 = 172.14°

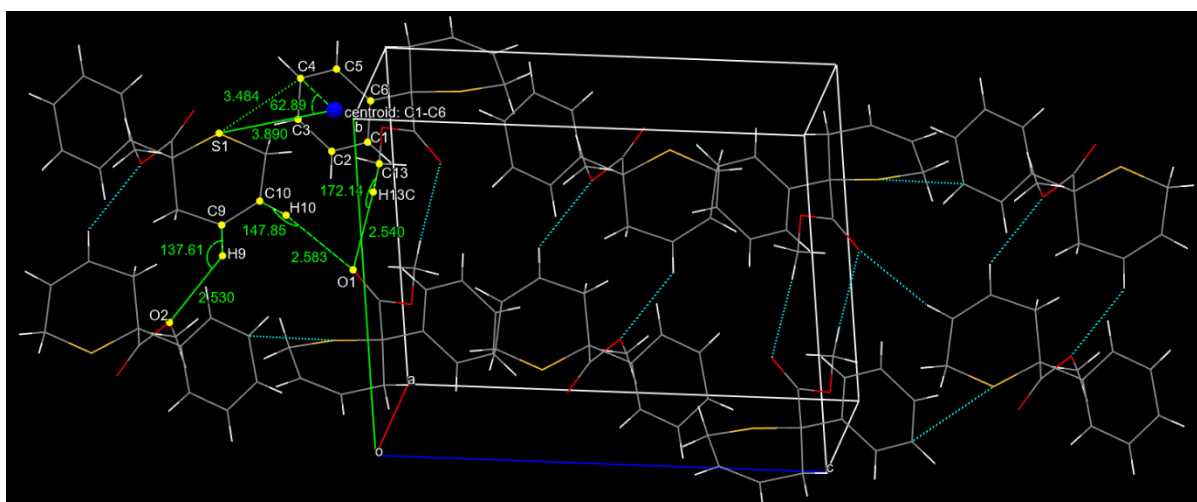

**Figure S2.** Sulfur--- $\pi$  and C-H---O intermolecular interactions of compound **4b**

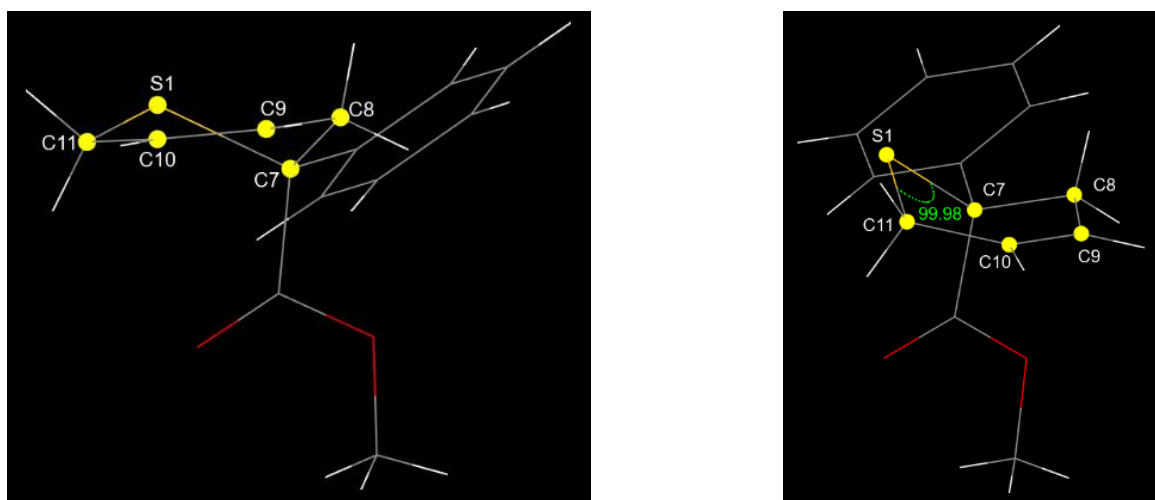

**Figure S3.** Thiopyran in compound **4b** exist as half-chair form with bond angle 99.98° of C-S-C

## 9. Crystal data and structure refinement for compound **4u<sub>1</sub>**

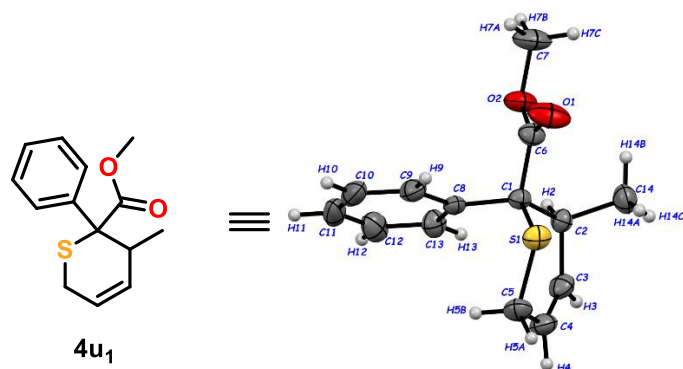

**Figure S4.** ORTEP diagram of compound **4u<sub>1</sub>** showing thermal ellipsoids at the 40% probability level

**Table S8.** Crystal data and structure refinement for **4u<sub>1</sub>**

|                                            |                                                             |
|--------------------------------------------|-------------------------------------------------------------|
| CCDC                                       | 2332012                                                     |
| Empirical formula                          | C <sub>14</sub> H <sub>16</sub> O <sub>2</sub> S            |
| Formula weight                             | 248.33                                                      |
| Temperature/K                              | 298(2)                                                      |
| Crystal system                             | Triclinic                                                   |
| Space group                                | <i>P</i> -1                                                 |
| <i>a</i> (Å)                               | 7.7176(9)                                                   |
| <i>b</i> (Å)                               | 8.7676(11)                                                  |
| <i>c</i> (Å)                               | 10.6594(13)                                                 |
| $\alpha$ (°)                               | 84.913(5)                                                   |
| $\beta$ (°)                                | 82.334(4)                                                   |
| $\gamma$ (°)                               | 65.082(4)                                                   |
| Volume (Å <sup>3</sup> )                   | 647.86(14)                                                  |
| <i>Z</i>                                   | 2                                                           |
| $\rho_{\text{calc}}$ (mg m <sup>-3</sup> ) | 1.273                                                       |
| $\mu$ (mm <sup>-1</sup> )                  | 0.237                                                       |
| <i>F</i> (000)                             | 264                                                         |
| Crystal size (mm)                          | 0.202 (max) × 0.127 (mid) × 0.074 (min)                     |
| Radiation                                  | MoK $\alpha$ ( $\lambda$ = 0.71073 Å)                       |
| Theta range for data collection (°)        | 3.329 to 27.128                                             |
| Index ranges                               | -9 ≤ <i>h</i> ≤ 9, -11 ≤ <i>k</i> ≤ 11, -13 ≤ <i>l</i> ≤ 13 |
| Reflections collected / unique             | 27420 / 2847 [ <i>R</i> <sub>int</sub> = 0.0654]            |
| Completeness to theta = 25.242             | 99.7 %                                                      |
| Absorption correction                      | Semi-empirical from equivalents                             |
| Max. and min. transmission                 | 0.745 and 0.667                                             |
| Refinement method                          | Full-matrix least-squares on <i>F</i> <sup>2</sup>          |
| Data/restraints/parameters                 | 2847/0/156                                                  |



|                                                      |                                  |
|------------------------------------------------------|----------------------------------|
| Goodness-of-fit on $F^2$                             | 1.185                            |
| Final R indices [ $I > 2\sigma(I)$ ]                 | $R_1 = 0.0614$ , $wR_2 = 0.1614$ |
| R indices [all data]                                 | $R_1 = 0.0817$ , $wR_2 = 0.1812$ |
| Largest diff. peak and hole ( $e \text{ \AA}^{-3}$ ) | 0.668 and -0.447                 |

**Table S9.** Atomic coordinates ( $\times 10^4$ ) and equivalent isotropic displacement parameters ( $\text{\AA}^2 \times 10^3$ ) for  $4u_I$  U(eq) is defined as one third of the trace of the orthogonalized  $U^{ij}$  tensor

|       | <b>x</b> | <b>y</b> | <b>z</b> | <b>U(eq)</b> |
|-------|----------|----------|----------|--------------|
| C(1)  | 5716(3)  | 6939(3)  | 2779(2)  | 32(1)        |
| C(2)  | 3733(3)  | 7039(3)  | 3392(2)  | 36(1)        |
| C(3)  | 2571(4)  | 6853(3)  | 2440(3)  | 46(1)        |
| C(4)  | 2823(4)  | 7042(4)  | 1196(3)  | 50(1)        |
| C(5)  | 4363(4)  | 7467(4)  | 472(3)   | 51(1)        |
| C(6)  | 6629(4)  | 7532(3)  | 3709(2)  | 42(1)        |
| C(7)  | 7779(6)  | 6997(5)  | 5712(3)  | 70(1)        |
| C(8)  | 7143(3)  | 5166(3)  | 2382(2)  | 33(1)        |
| C(9)  | 8928(4)  | 4955(4)  | 1747(2)  | 46(1)        |
| C(10) | 10284(4) | 3386(5)  | 1406(3)  | 61(1)        |
| C(11) | 9891(5)  | 1983(4)  | 1670(3)  | 63(1)        |
| C(12) | 8149(5)  | 2169(4)  | 2292(3)  | 59(1)        |
| C(13) | 6780(4)  | 3745(3)  | 2644(3)  | 46(1)        |
| C(14) | 2530(4)  | 8657(4)  | 4113(3)  | 54(1)        |
| O(1)  | 6983(4)  | 8738(3)  | 3544(2)  | 74(1)        |
| O(2)  | 6971(3)  | 6524(2)  | 4742(2)  | 52(1)        |
| S(1)  | 5358(1)  | 8443(1)  | 1417(1)  | 45(1)        |

**Table S10.** Bond lengths [ $\text{\AA}$ ] for  $4u_I$

| <b>Atoms 1,2</b> | <b>d 1,2 [<math>\text{\AA}</math>]</b> | <b>Atoms 1,2</b> | <b>d 1,2 [<math>\text{\AA}</math>]</b> |
|------------------|----------------------------------------|------------------|----------------------------------------|
| C(1)-C(6)        | 1.529(3)                               | C(7)-H(7A)       | 0.9600                                 |
| C(1)-C(8)        | 1.535(3)                               | C(7)-H(7B)       | 0.9600                                 |
| C(1)-C(2)        | 1.552(3)                               | C(7)-H(7C)       | 0.9600                                 |
| C(1)-S(1)        | 1.839(2)                               | C(8)-C(13)       | 1.386(3)                               |
| C(2)-C(3)        | 1.502(3)                               | C(8)-C(9)        | 1.396(3)                               |
| C(2)-C(14)       | 1.535(3)                               | C(9)-C(10)       | 1.375(4)                               |
| C(2)-H(2)        | 0.9800                                 | C(9)-H(9)        | 0.9300                                 |
| C(3)-C(4)        | 1.321(4)                               | C(10)-C(11)      | 1.384(5)                               |
| C(3)-H(3)        | 0.9300                                 | C(10)-H(10)      | 0.9300                                 |
| C(4)-C(5)        | 1.491(4)                               | C(11)-C(12)      | 1.368(5)                               |
| C(4)-H(4)        | 0.9300                                 | C(11)-H(11)      | 0.9300                                 |
| C(5)-S(1)        | 1.802(3)                               | C(12)-C(13)      | 1.387(4)                               |
| C(5)-H(5A)       | 0.9700                                 | C(12)-H(12)      | 0.9300                                 |
| C(5)-H(5B)       | 0.9700                                 | C(13)-H(13)      | 0.9300                                 |
| C(6)-O(1)        | 1.192(3)                               | C(14)-H(14A)     | 0.9600                                 |
| C(6)-O(2)        | 1.331(3)                               | C(14)-H(14B)     | 0.9600                                 |
| C(7)-O(2)        | 1.448(3)                               | C(14)-H(14C)     | 0.9600                                 |

Symmetry transformations used to generate equivalent atoms:

**Table S11.** Bond angles [ $^\circ$ ] for  $4u_I$

| <b>Atoms 1,2,3</b> | <b>Angle 1,2,3 [<math>^\circ</math>]</b> | <b>Atoms 1,2,3</b> | <b>Angle 1,2,3 [<math>^\circ</math>]</b> |
|--------------------|------------------------------------------|--------------------|------------------------------------------|
| C(6)-C(1)-C(8)     | 107.93(18)                               | O(2)-C(7)-H(7C)    | 109.5                                    |

| Atoms 1,2,3      | Angle 1,2,3 [°] | Atoms 1,2,3         | Angle 1,2,3 [°] |
|------------------|-----------------|---------------------|-----------------|
| C(6)-C(1)-C(2)   | 109.62(18)      | H(7A)-C(7)-H(7C)    | 109.5           |
| C(8)-C(1)-C(2)   | 113.95(18)      | H(7B)-C(7)-H(7C)    | 109.5           |
| C(6)-C(1)-S(1)   | 105.31(15)      | C(13)-C(8)-C(9)     | 117.7(2)        |
| C(8)-C(1)-S(1)   | 110.61(15)      | C(13)-C(8)-C(1)     | 123.7(2)        |
| C(2)-C(1)-S(1)   | 109.05(15)      | C(9)-C(8)-C(1)      | 118.6(2)        |
| C(3)-C(2)-C(14)  | 109.1(2)        | C(10)-C(9)-C(8)     | 121.0(3)        |
| C(3)-C(2)-C(1)   | 112.15(19)      | C(10)-C(9)-H(9)     | 119.5           |
| C(14)-C(2)-C(1)  | 113.5(2)        | C(8)-C(9)-H(9)      | 119.5           |
| C(3)-C(2)-H(2)   | 107.2           | C(9)-C(10)-C(11)    | 120.5(3)        |
| C(14)-C(2)-H(2)  | 107.2           | C(9)-C(10)-H(10)    | 119.8           |
| C(1)-C(2)-H(2)   | 107.2           | C(11)-C(10)-H(10)   | 119.8           |
| C(4)-C(3)-C(2)   | 127.4(2)        | C(12)-C(11)-C(10)   | 119.2(3)        |
| C(4)-C(3)-H(3)   | 116.3           | C(12)-C(11)-H(11)   | 120.4           |
| C(2)-C(3)-H(3)   | 116.3           | C(10)-C(11)-H(11)   | 120.4           |
| C(3)-C(4)-C(5)   | 125.5(2)        | C(11)-C(12)-C(13)   | 120.6(3)        |
| C(3)-C(4)-H(4)   | 117.2           | C(11)-C(12)-H(12)   | 119.7           |
| C(5)-C(4)-H(4)   | 117.2           | C(13)-C(12)-H(12)   | 119.7           |
| C(4)-C(5)-S(1)   | 113.18(19)      | C(8)-C(13)-C(12)    | 121.0(3)        |
| C(4)-C(5)-H(5A)  | 108.9           | C(8)-C(13)-H(13)    | 119.5           |
| S(1)-C(5)-H(5A)  | 108.9           | C(12)-C(13)-H(13)   | 119.5           |
| C(4)-C(5)-H(5B)  | 108.9           | C(2)-C(14)-H(14A)   | 109.5           |
| S(1)-C(5)-H(5B)  | 108.9           | C(2)-C(14)-H(14B)   | 109.5           |
| H(5A)-C(5)-H(5B) | 107.8           | H(14A)-C(14)-H(14B) | 109.5           |
| O(1)-C(6)-O(2)   | 124.1(2)        | C(2)-C(14)-H(14C)   | 109.5           |
| O(1)-C(6)-C(1)   | 125.0(2)        | H(14A)-C(14)-H(14C) | 109.5           |
| O(2)-C(6)-C(1)   | 110.86(19)      | H(14B)-C(14)-H(14C) | 109.5           |
| O(2)-C(7)-H(7A)  | 109.5           | C(6)-O(2)-C(7)      | 115.7(2)        |
| O(2)-C(7)-H(7B)  | 109.5           | C(5)-S(1)-C(1)      | 96.92(12)       |
| H(7A)-C(7)-H(7B) | 109.5           |                     |                 |

Symmetry transformations used to generate equivalent atoms:

**Table S12.** Anisotropic displacement parameters ( $\text{\AA}^2 \times 10^3$ ) for **4u<sub>l</sub>**. The anisotropic displacement factor exponent takes the form:  $-2\pi^2 [h^2 a^{*2} U_{11} + \dots + 2 h k a^* b^* U_{12}]$

| Atom  | U11    | U22   | U33   | U23    | U13    | U12    |
|-------|--------|-------|-------|--------|--------|--------|
| C(1)  | 36(1)  | 31(1) | 31(1) | 2(1)   | -7(1)  | -16(1) |
| C(2)  | 34(1)  | 36(1) | 37(1) | 0(1)   | -2(1)  | -14(1) |
| C(3)  | 35(1)  | 49(2) | 58(2) | -1(1)  | -7(1)  | -20(1) |
| C(4)  | 47(1)  | 52(2) | 53(2) | 0(1)   | -21(1) | -20(1) |
| C(5)  | 57(2)  | 57(2) | 38(1) | 2(1)   | -16(1) | -21(1) |
| C(6)  | 49(1)  | 41(1) | 42(1) | 0(1)   | -8(1)  | -25(1) |
| C(7)  | 101(3) | 76(2) | 59(2) | 6(2)   | -40(2) | -55(2) |
| C(8)  | 32(1)  | 37(1) | 28(1) | 1(1)   | -10(1) | -12(1) |
| C(9)  | 37(1)  | 62(2) | 41(1) | -1(1)  | -7(1)  | -22(1) |
| C(10) | 36(1)  | 84(2) | 45(2) | -6(2)  | -7(1)  | -6(1)  |
| C(11) | 61(2)  | 51(2) | 46(2) | -6(1)  | -16(1) | 11(1)  |
| C(12) | 78(2)  | 38(2) | 53(2) | 2(1)   | -12(2) | -15(1) |
| C(13) | 51(2)  | 35(1) | 50(2) | 2(1)   | -5(1)  | -15(1) |
| C(14) | 52(2)  | 50(2) | 52(2) | -11(1) | 3(1)   | -13(1) |
| O(1)  | 124(2) | 74(2) | 65(1) | 14(1)  | -33(1) | -77(2) |
| O(2)  | 76(1)  | 52(1) | 45(1) | 9(1)   | -29(1) | -38(1) |
| S(1)  | 54(1)  | 42(1) | 42(1) | 11(1)  | -12(1) | -24(1) |

**Table S13.** Hydrogen coordinates ( $\times 10^4$ ) and isotropic displacement parameters ( $\text{\AA}^2 \times 10^3$ ) for **4u<sub>l</sub>**

|        | <b>x</b> | <b>y</b> | <b>z</b> | <b>U(eq)</b> |
|--------|----------|----------|----------|--------------|
| H(2)   | 3975     | 6093     | 4008     | 43           |
| H(3)   | 1558     | 6573     | 2764     | 55           |
| H(4)   | 1968     | 6898     | 732      | 60           |
| H(5A)  | 3839     | 8223     | -237     | 61           |
| H(5B)  | 5386     | 6447     | 133      | 61           |
| H(7A)  | 8952     | 7074     | 5357     | 105          |
| H(7B)  | 8040     | 6164     | 6393     | 105          |
| H(7C)  | 6881     | 8069     | 6029     | 105          |
| H(9)   | 9205     | 5888     | 1552     | 55           |
| H(10)  | 11472    | 3269     | 995      | 73           |
| H(11)  | 10801    | 926      | 1426     | 76           |
| H(12)  | 7880     | 1230     | 2481     | 71           |
| H(13)  | 5600     | 3850     | 3063     | 56           |
| H(14A) | 2372     | 9617     | 3555     | 81           |
| H(14B) | 3174     | 8686     | 4816     | 81           |
| H(14C) | 1292     | 8679     | 4420     | 81           |

**Table S14.** Torsion angles [ $^\circ$ ] for **4u<sub>l</sub>**

|                         |             |
|-------------------------|-------------|
| C(6)-C(1)-C(2)-C(3)     | 167.1(2)    |
| C(8)-C(1)-C(2)-C(3)     | -71.9(2)    |
| S(1)-C(1)-C(2)-C(3)     | 52.2(2)     |
| C(6)-C(1)-C(2)-C(14)    | 42.8(3)     |
| C(8)-C(1)-C(2)-C(14)    | 163.9(2)    |
| S(1)-C(1)-C(2)-C(14)    | -72.0(2)    |
| C(14)-C(2)-C(3)-C(4)    | 108.4(3)    |
| C(1)-C(2)-C(3)-C(4)     | -18.2(4)    |
| C(2)-C(3)-C(4)-C(5)     | 0.8(5)      |
| C(3)-C(4)-C(5)-S(1)     | -21.1(4)    |
| C(8)-C(1)-C(6)-O(1)     | 118.9(3)    |
| C(2)-C(1)-C(6)-O(1)     | -116.4(3)   |
| S(1)-C(1)-C(6)-O(1)     | 0.7(3)      |
| C(8)-C(1)-C(6)-O(2)     | -61.5(3)    |
| C(2)-C(1)-C(6)-O(2)     | 63.2(3)     |
| S(1)-C(1)-C(6)-O(2)     | -179.63(17) |
| C(6)-C(1)-C(8)-C(13)    | 116.4(2)    |
| C(2)-C(1)-C(8)-C(13)    | -5.6(3)     |
| S(1)-C(1)-C(8)-C(13)    | -128.9(2)   |
| C(6)-C(1)-C(8)-C(9)     | -62.1(3)    |
| C(2)-C(1)-C(8)-C(9)     | 175.9(2)    |
| S(1)-C(1)-C(8)-C(9)     | 52.7(2)     |
| C(13)-C(8)-C(9)-C(10)   | -0.6(4)     |
| C(1)-C(8)-C(9)-C(10)    | 177.9(2)    |
| C(8)-C(9)-C(10)-C(11)   | 1.0(4)      |
| C(9)-C(10)-C(11)-C(12)  | -1.0(4)     |
| C(10)-C(11)-C(12)-C(13) | 0.7(5)      |
| C(9)-C(8)-C(13)-C(12)   | 0.3(4)      |
| C(1)-C(8)-C(13)-C(12)   | -178.1(2)   |
| C(11)-C(12)-C(13)-C(8)  | -0.4(4)     |
| O(1)-C(6)-O(2)-C(7)     | 1.6(4)      |
| C(1)-C(6)-O(2)-C(7)     | -178.0(2)   |
| C(4)-C(5)-S(1)-C(1)     | 47.5(2)     |

|                     |            |
|---------------------|------------|
| C(6)-C(1)-S(1)-C(5) | 178.55(17) |
| C(8)-C(1)-S(1)-C(5) | 62.19(17)  |
| C(2)-C(1)-S(1)-C(5) | -63.87(18) |

The following intermolecular interactions are present in compound **4u<sub>I</sub>**

The molecules of compound **4u<sub>I</sub>** was aligned by di-hydrogen (C-H---H-C)<sup>13-15</sup> and C-H---O intermolecular interactions.

- (i) C7-H7B---H3-C3  
 Distance H7B---H3 = 2.394 Å;      Angle C7-H7B---H3 = 151.01°  
 Angle C3-H3---H7B = 123.94°
- (ii) C12-H12---O1  
 Distance H12---O1 = 2.676 Å;      Angle C12-H12---O1 = 167.50°

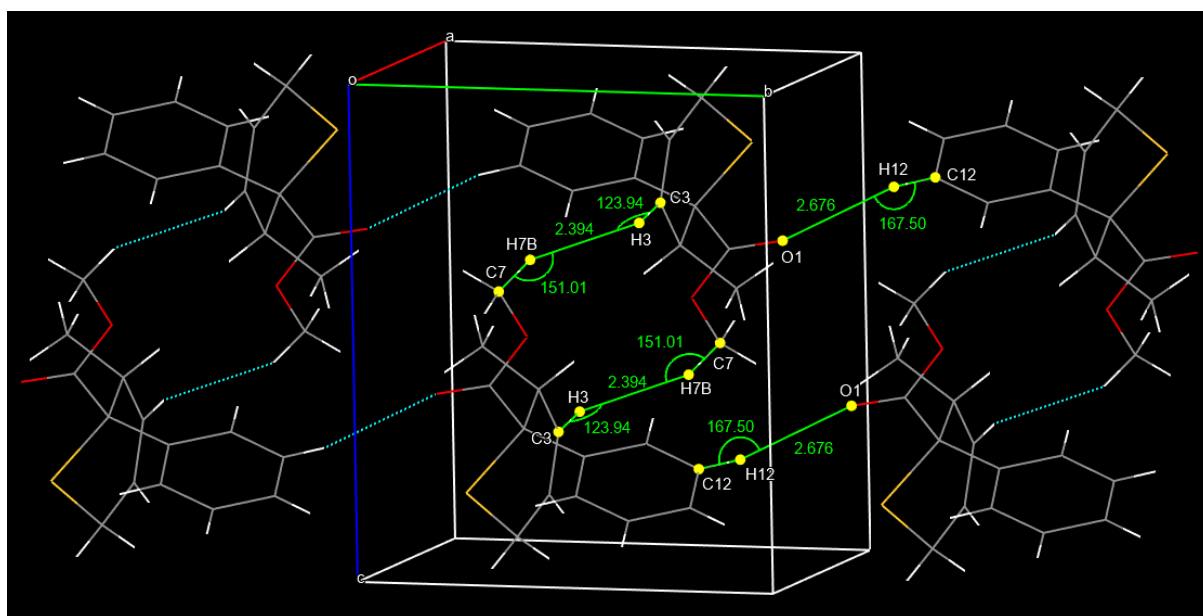

Figure S5. C-H---H-C and C-H---O intermolecular interactions of compound **4u<sub>I</sub>**

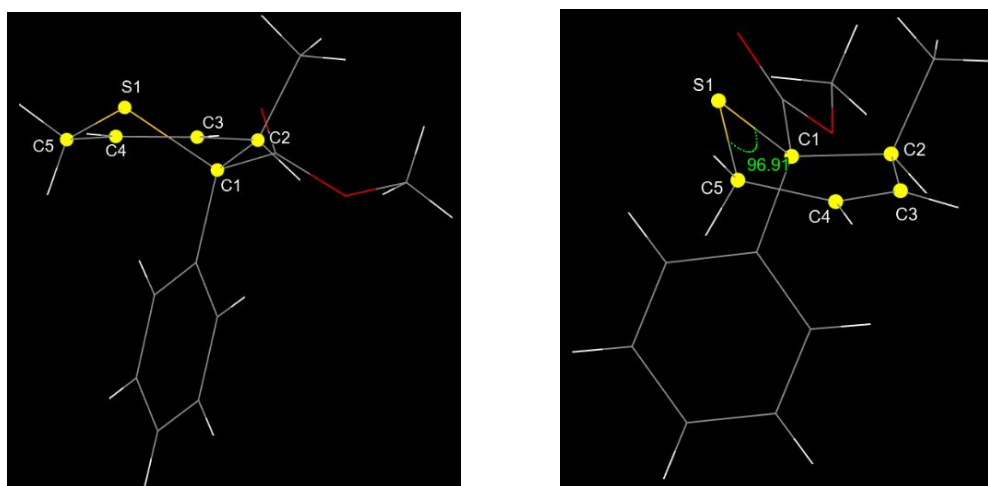

Figure S6. Thiopyran in compound **4u<sub>I</sub>** exist as half-chair form with bond angle 96.91° of C-S-C

## 10. References

- 1 H. Keipour and T. Ollevier, Iron-catalyzed carbene insertion reactions of  $\alpha$ -diazoesters into Si–H bonds, *Org. Lett.*, 2017, **19**, 5736–5739.
- 2 S. Muthusamy, C. Gunanathan and M. Nethaji, Multicomponent reactions of diazoamides: diastereoselective synthesis of mono- and bis-spirofurooxindoles, *J. Org. Chem.*, 2004, **69**, 5631–5637.
- 3 Q. Feng, S. Wang, X. Ma, C. Rao and Q. Song, Design, synthesis, and applications of stereospecific 1,3-diene carbonyls, *Sci. China Chem.*, 2022, **65**, 912–917.
- 4 L.-Z. Qin, X. Yuan, Y.-S. Cui, Q. Sun, X. Duan, K. Zhuang, L. Chen, J. Qiu and K. Guo, Visible-light-mediated S–H bond insertion reactions of diazoalkanes with cysteine residues in batch and flow, *Adv. Synth. Catal.*, 2020, **362**, 5093–5104.
- 5 D. Ba, S. Wen, Q. Tian, Y. Chen, W. Lv and G. Cheng, Rhodium(II)-catalyzed multicomponent assembly of  $\alpha,\alpha,\alpha$ -trisubstituted esters *via* formal insertion of O–C(sp<sup>3</sup>)–C(sp<sup>2</sup>) into C–C bonds, *Nat. Commun.*, 2020, **11**, 4219.
- 6 P. M. Reddy, K. Ramachandran and P. Anbarasan, Palladium-catalyzed diastereoselective synthesis of 2,2,3-trisubstituted dihydrobenzofurans *via* intramolecular trapping of *O*-ylides with activated alkenes, *J. Catal.*, 2021, **396**, 291–296.
- 7 K. Orłowska, K. Rybicka-Jasińska, P. Krajewski and D. Gryko, Photochemical Doyle–Kirmse reaction: a route to allenes, *Org. Lett.*, 2020, **22**, 1018–1021.
- 8 B. Wang, G.-M. Zhang, H. Zhang and J.-Y. Wang, B(C<sub>6</sub>F<sub>5</sub>)<sub>3</sub>-catalyzed oxidation of  $\alpha$ -diazoesters using DMF and molecular oxygen as oxygen sources, *RSC Adv.*, 2022, **12**, 33584–33588.
- 9 Z. Zhang, Z. Sheng, W. Yu, G. Wu, R. Zhang, W.-D. Chu, Y. Zhang and J. Wang, Catalytic asymmetric trifluoromethylthiolation *via* enantioselective [2,3]-sigmatropic rearrangement of sulfonium ylides, *Nat. Chem.*, 2017, **9**, 970–976.
- 10 X. Zhang, Z. Qu, Z. Ma, W. Shi, X. Jin and J. Wang, Catalytic asymmetric [2,3]-sigmatropic rearrangement of sulfur ylides generated from copper(I) carbenoids and allyl sulfides, *J. Org. Chem.*, 2002, **67**, 5621–5625.
- 11 X. Kong, P. Zhou and Y. Wang, Chalcogen $\cdots\pi$  bonding catalysis, *Angew. Chemie Int. Ed.*, 2021, **60**, 9395–9400.
- 12 K. S. C. Reid, P. F. Lindley and J. M. Thornton, Sulphur-aromatic interactions in proteins, *FEBS Lett.*, 1985, **190**, 209–213.
- 13 H. R. Khavasi, Y. Balmohammadi and S. S. Naghavi, Phenomenal observation of attractive intermolecular CH $\cdots$ HC interaction in a mercury (II) complex: an experimental and first-principles study, *ChemistrySelect*, 2019, **4**, 10246–10253.
- 14 D. A. Safin, M. G. Babashkina, K. Robeyns, M. P. Mitoraj, P. Kubisiak and Y. Garcia, Influence of the homopolar dihydrogen bonding C–H $\cdots$ H–C on coordination geometry: experimental and theoretical studies, *Chem. – A Eur. J.*, 2015, **21**, 16679–16687.
- 15 N. K. V. Monteiro and C. L. Firme, Hydrogen–Hydrogen bonds in highly branched alkanes and in alkane complexes: a DFT, ab initio, QTAIM, and ELF study, *J. Phys. Chem. A*, 2014, **118**, 1730–1740.

**11.** Copies of  $^1\text{H}$ ,  $^{13}\text{C}$ , selected [DEPT-135, COSY, HSQC, HMBC, NOESY, and 1D-NOE] NMR spectra for compounds **S1,2-4,6**

<sup>1</sup>H NMR for compound **S1f** (400 MHz, CDCl<sub>3</sub>)

(data)

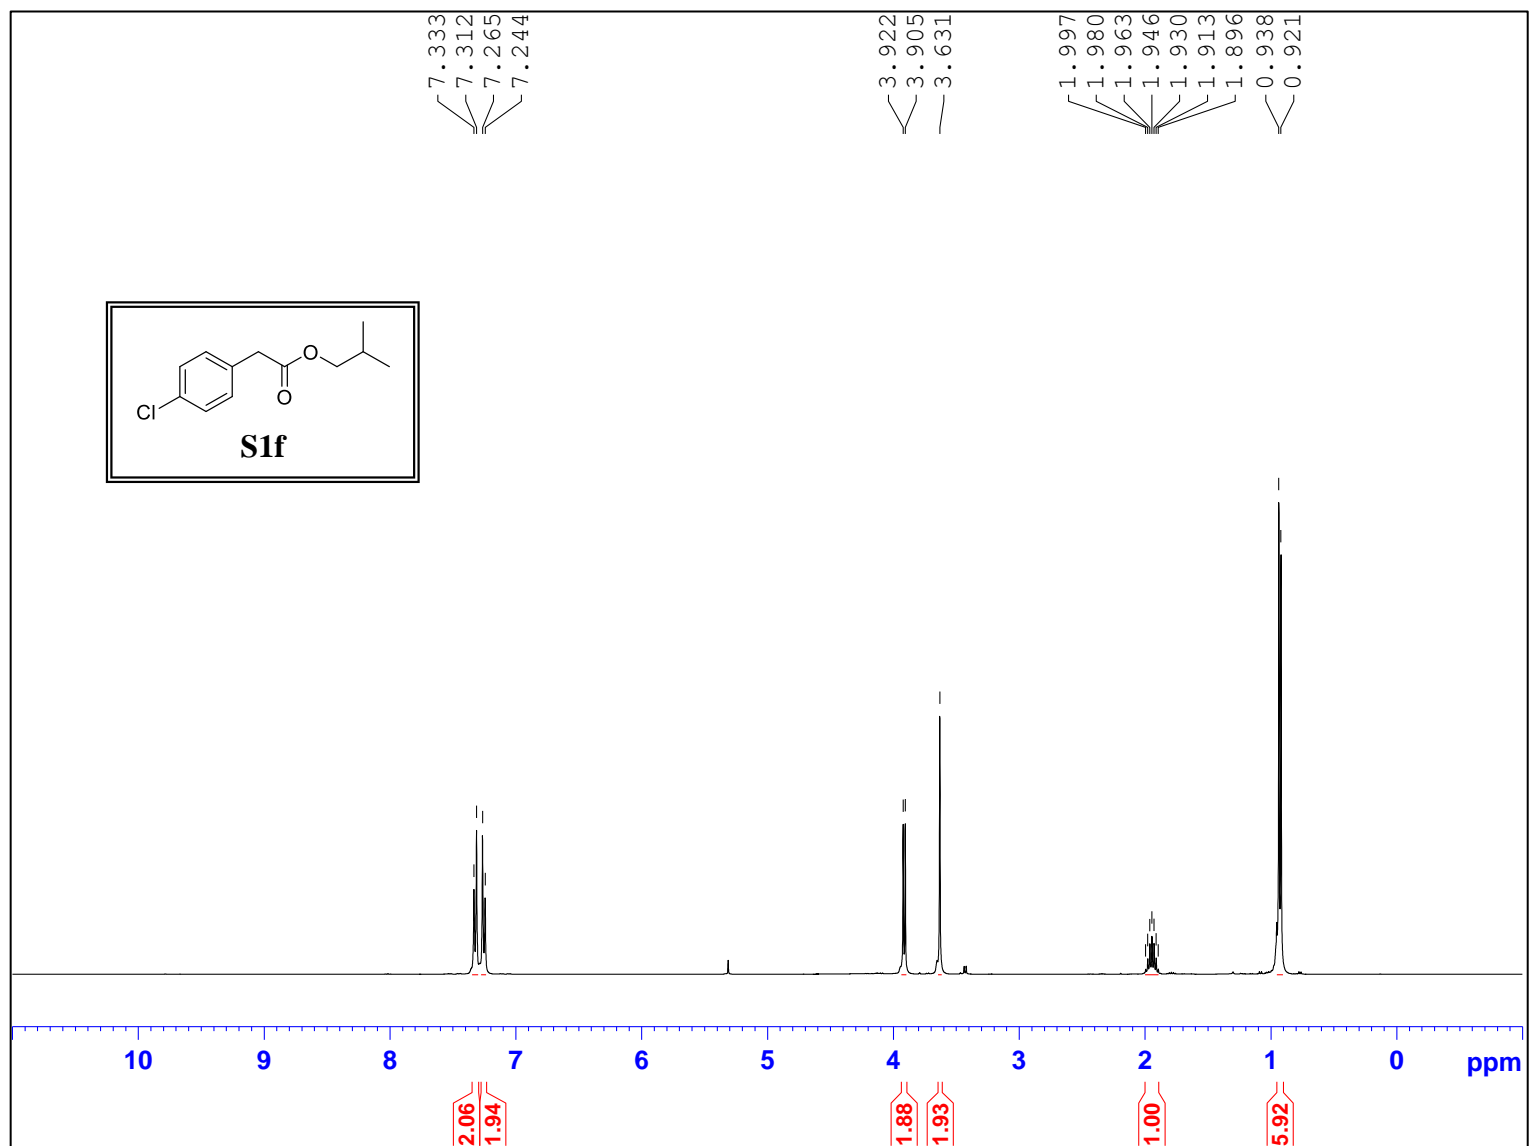

$^{13}\text{C}\{^1\text{H}\}$ -NMR for compound **S1f** (101 MHz,  $\text{CDCl}_3$ )

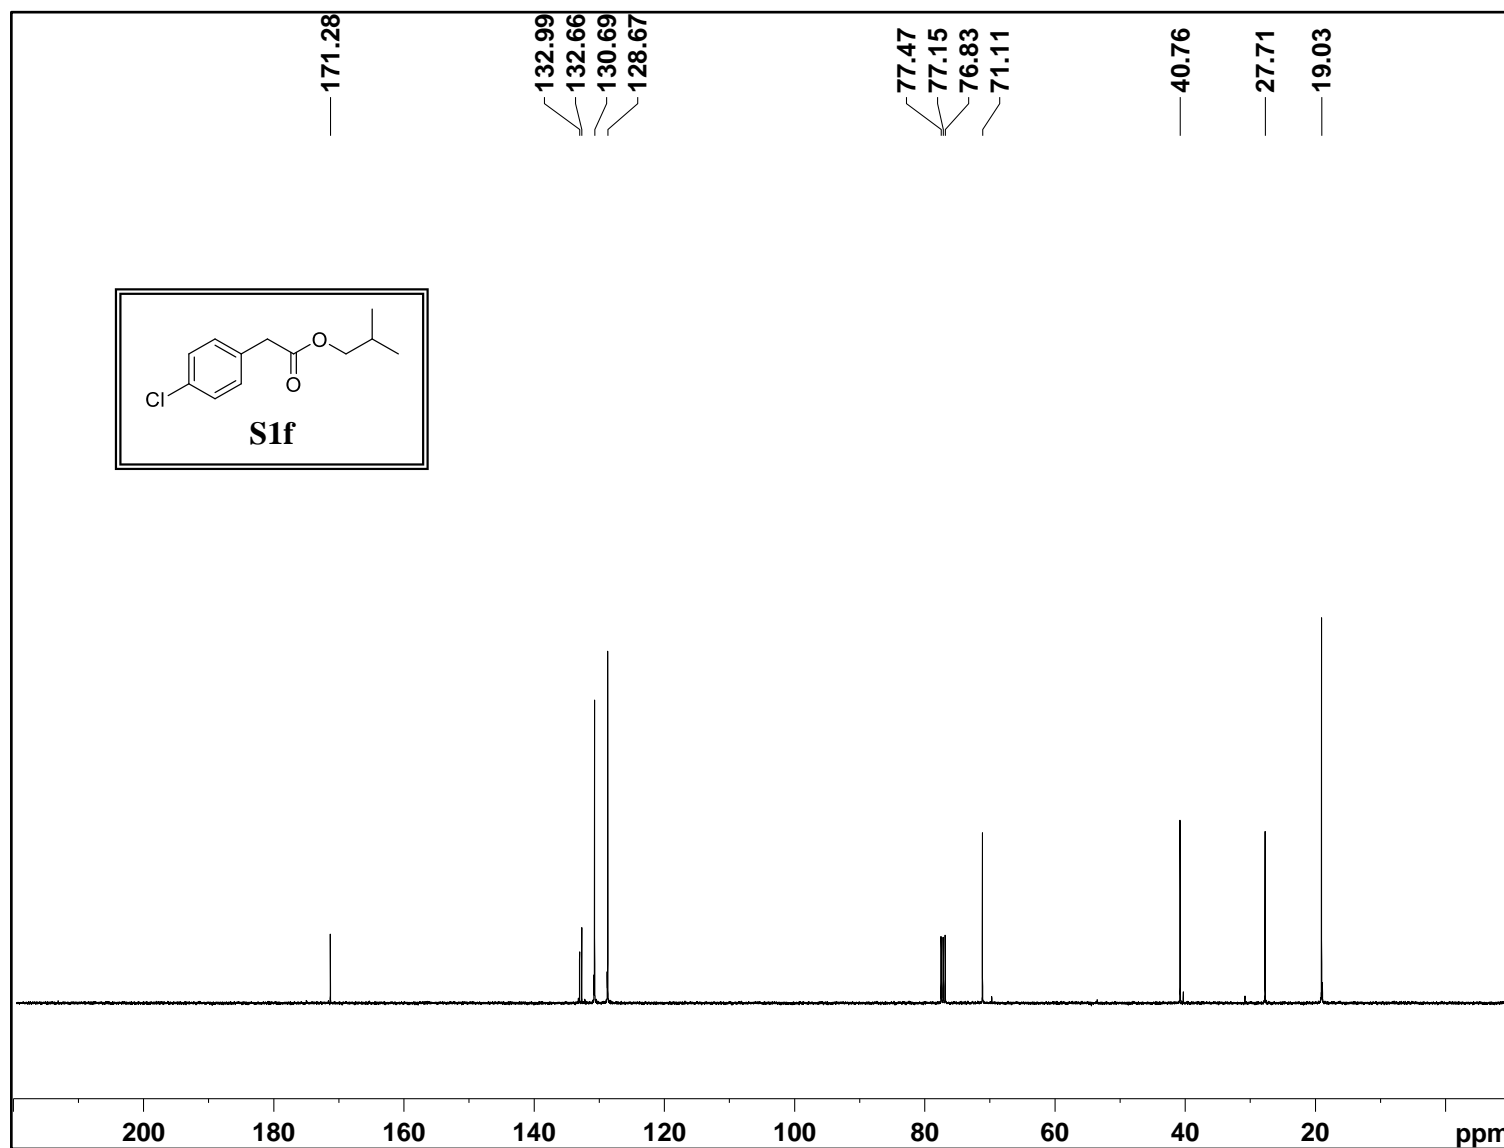



$^1\text{H}$  NMR for compound **2f** (400 MHz,  $\text{CDCl}_3$ )

(data)

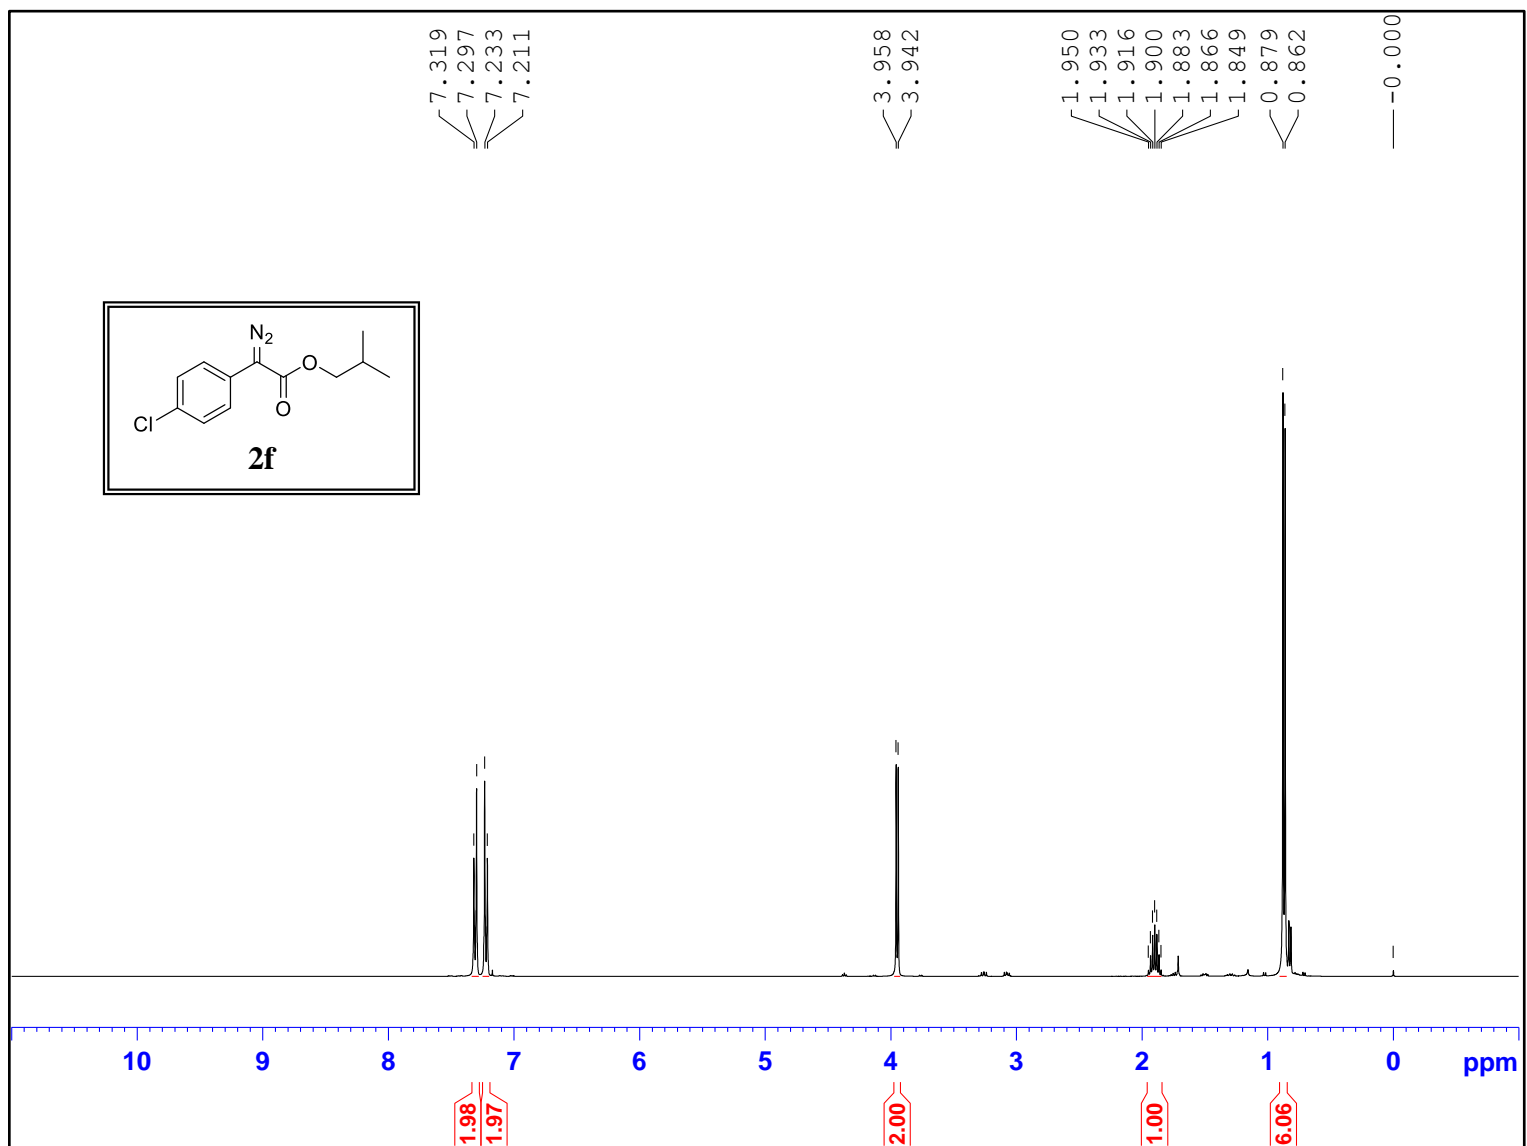

$^{13}\text{C}\{^1\text{H}\}$  NMR for compound **2f** (101 MHz,  $\text{CDCl}_3$ )

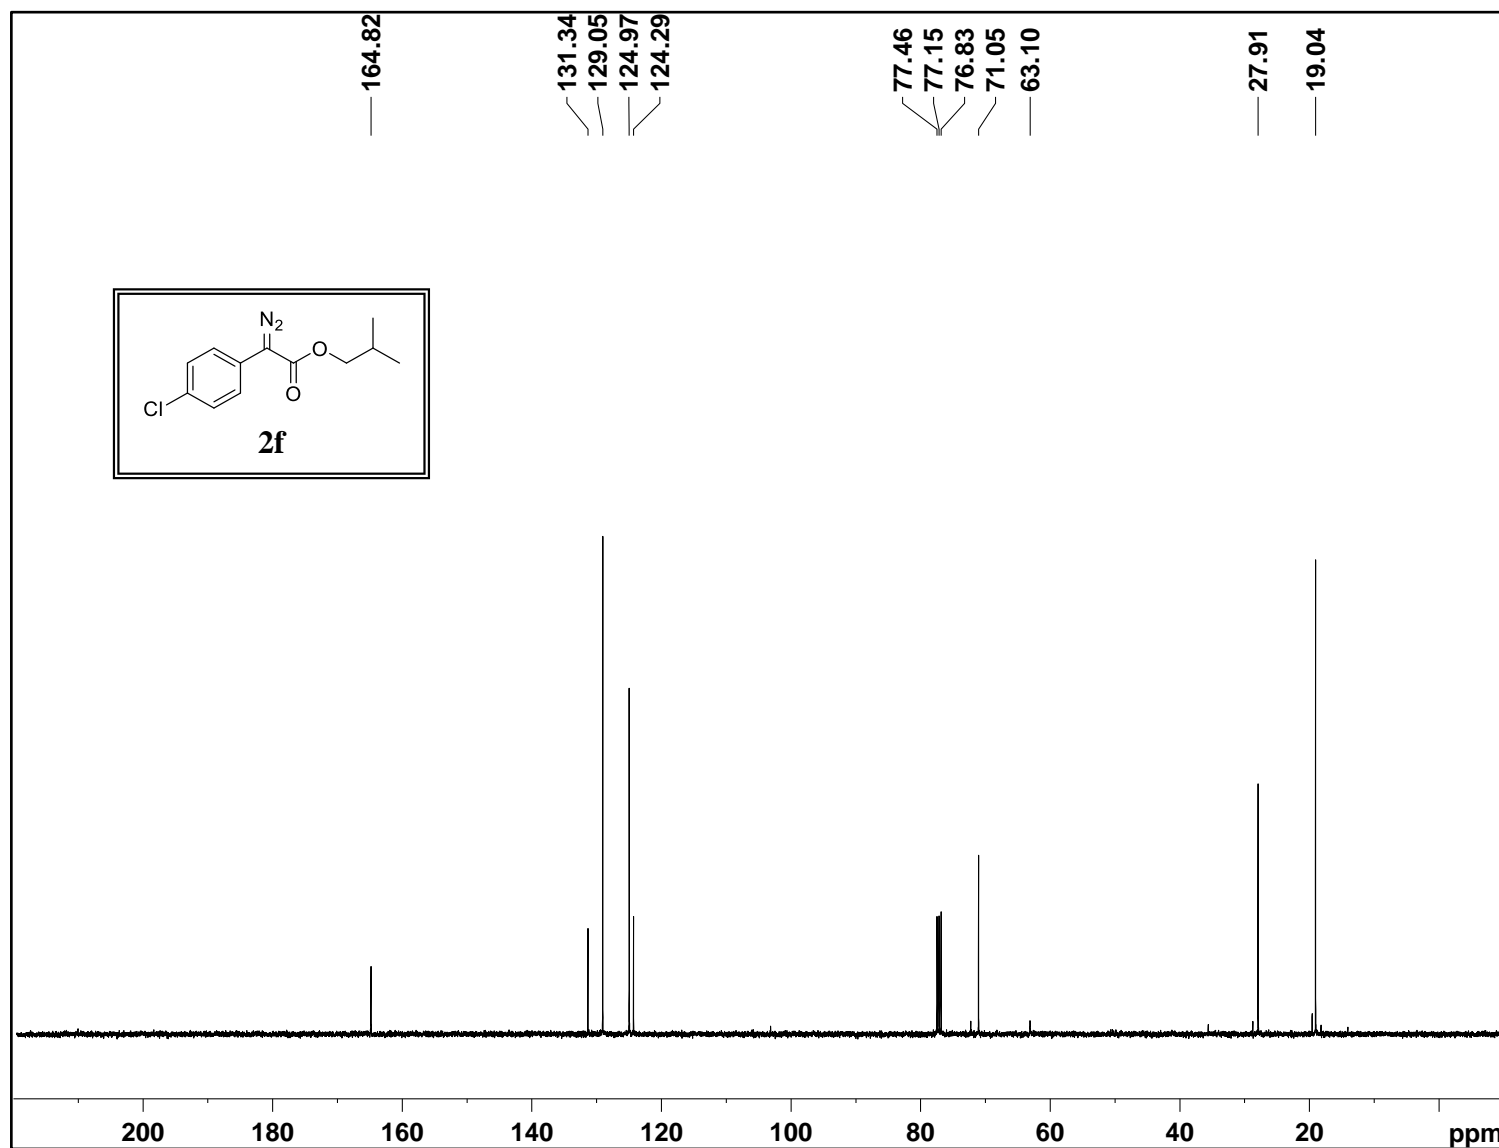

<sup>1</sup>H NMR for compound **S1p** (400 MHz, CDCl<sub>3</sub>) (data)

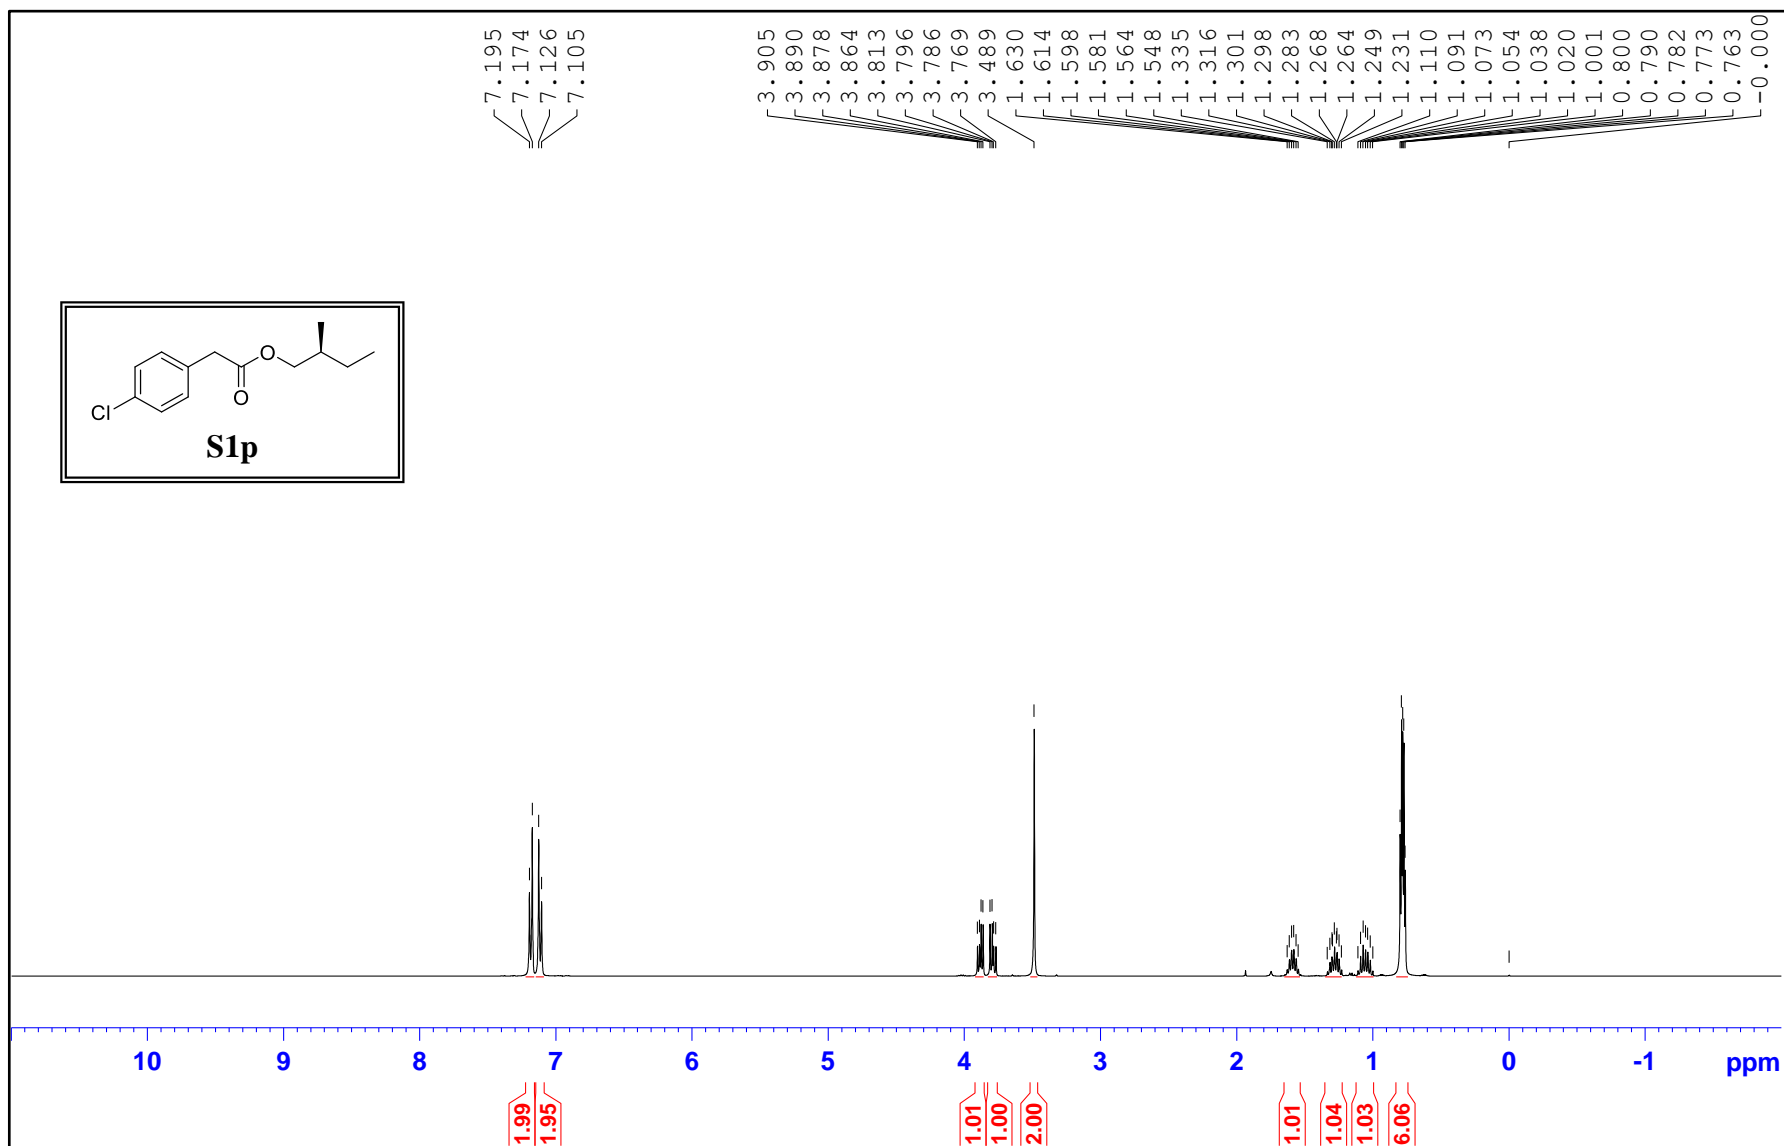

$^{13}\text{C}\{^1\text{H}\}$  NMR for compound **S1p** (101 MHz,  $\text{CDCl}_3$ )

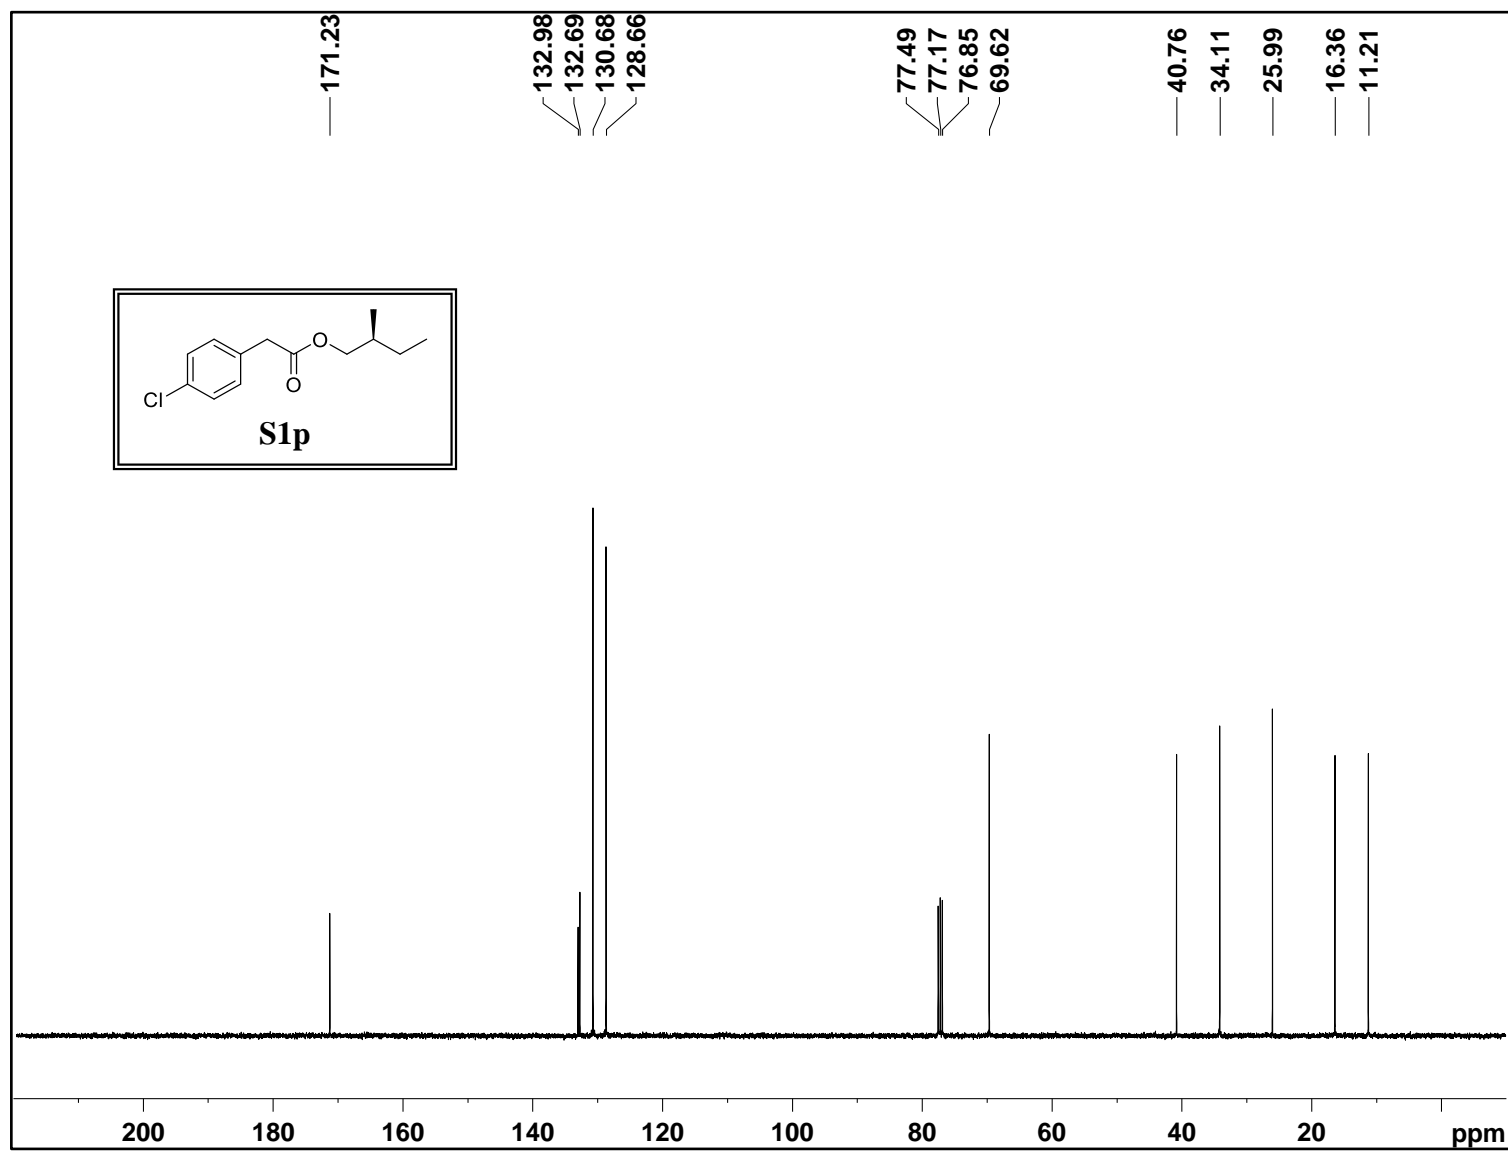

<sup>1</sup>H NMR for compound **2p** (400 MHz, CDCl<sub>3</sub>) (data)

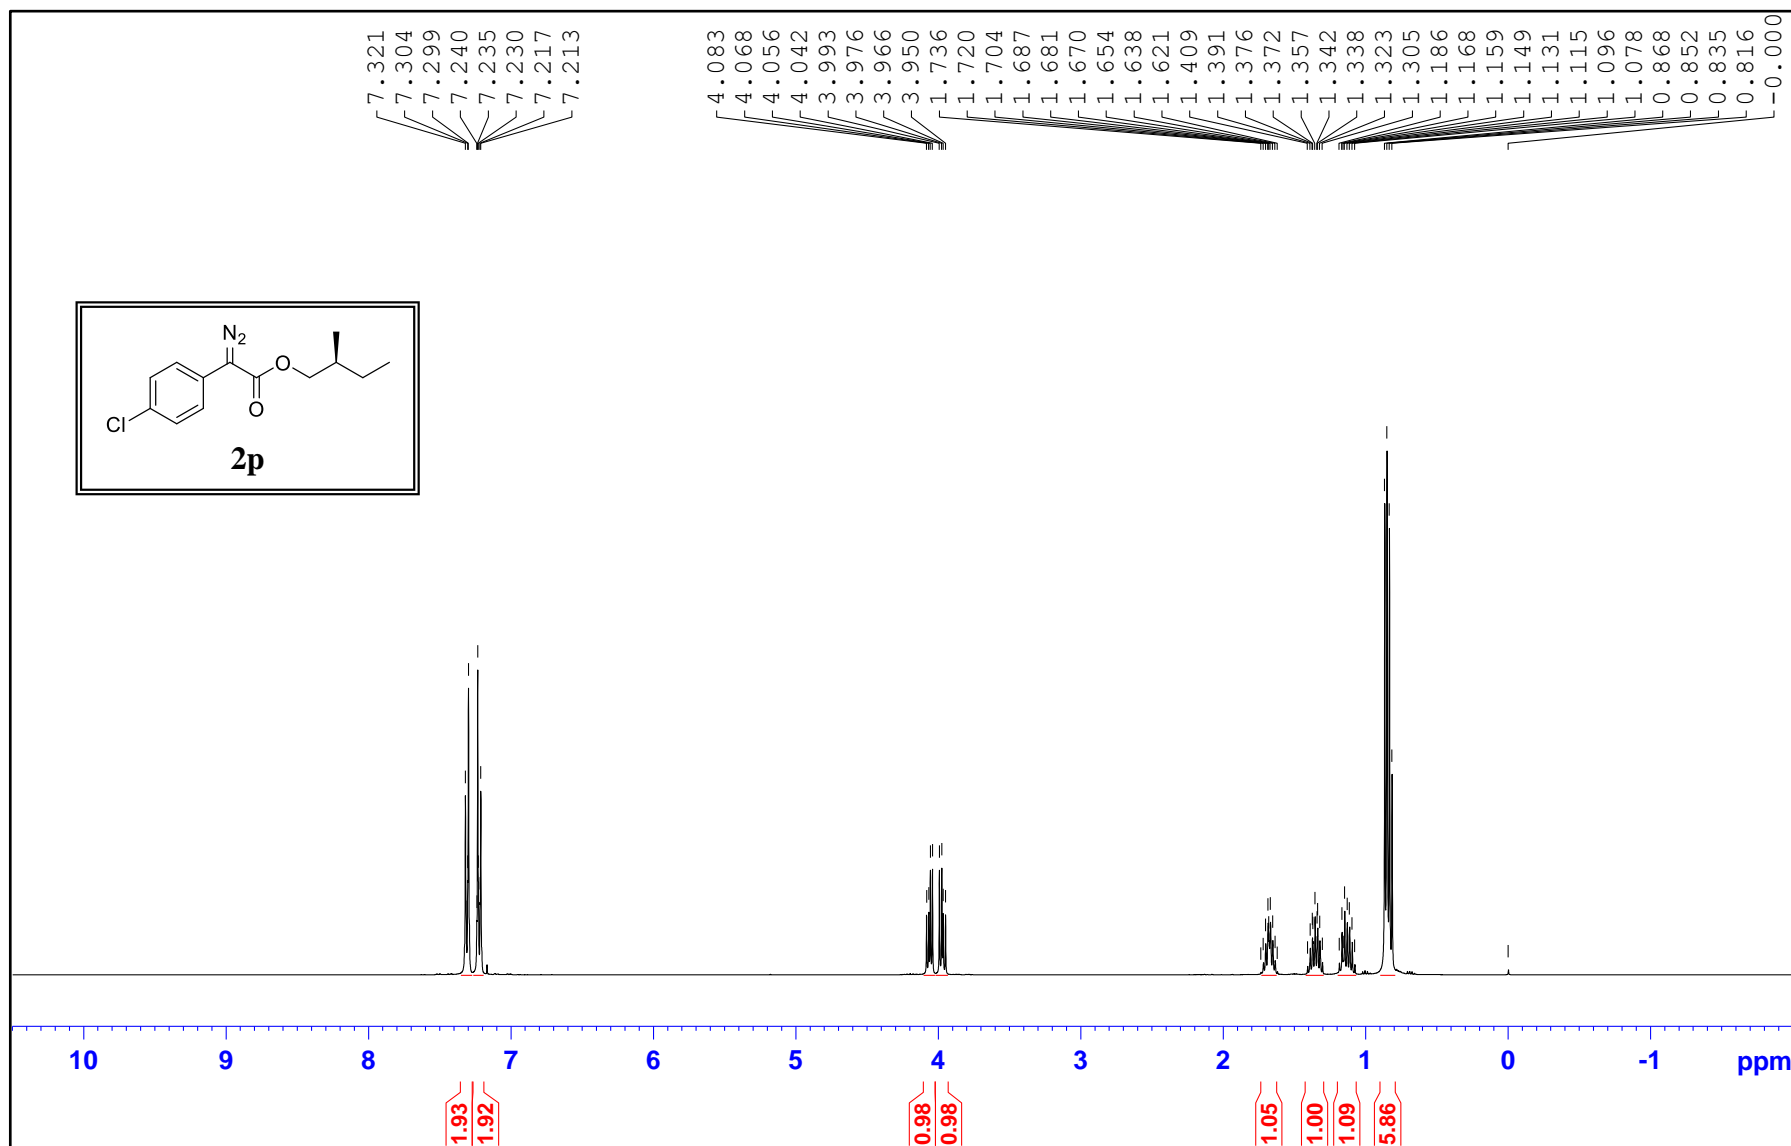

$^{13}\text{C}\{^1\text{H}\}$  NMR for compound **2p** (101 MHz,  $\text{CDCl}_3$ )

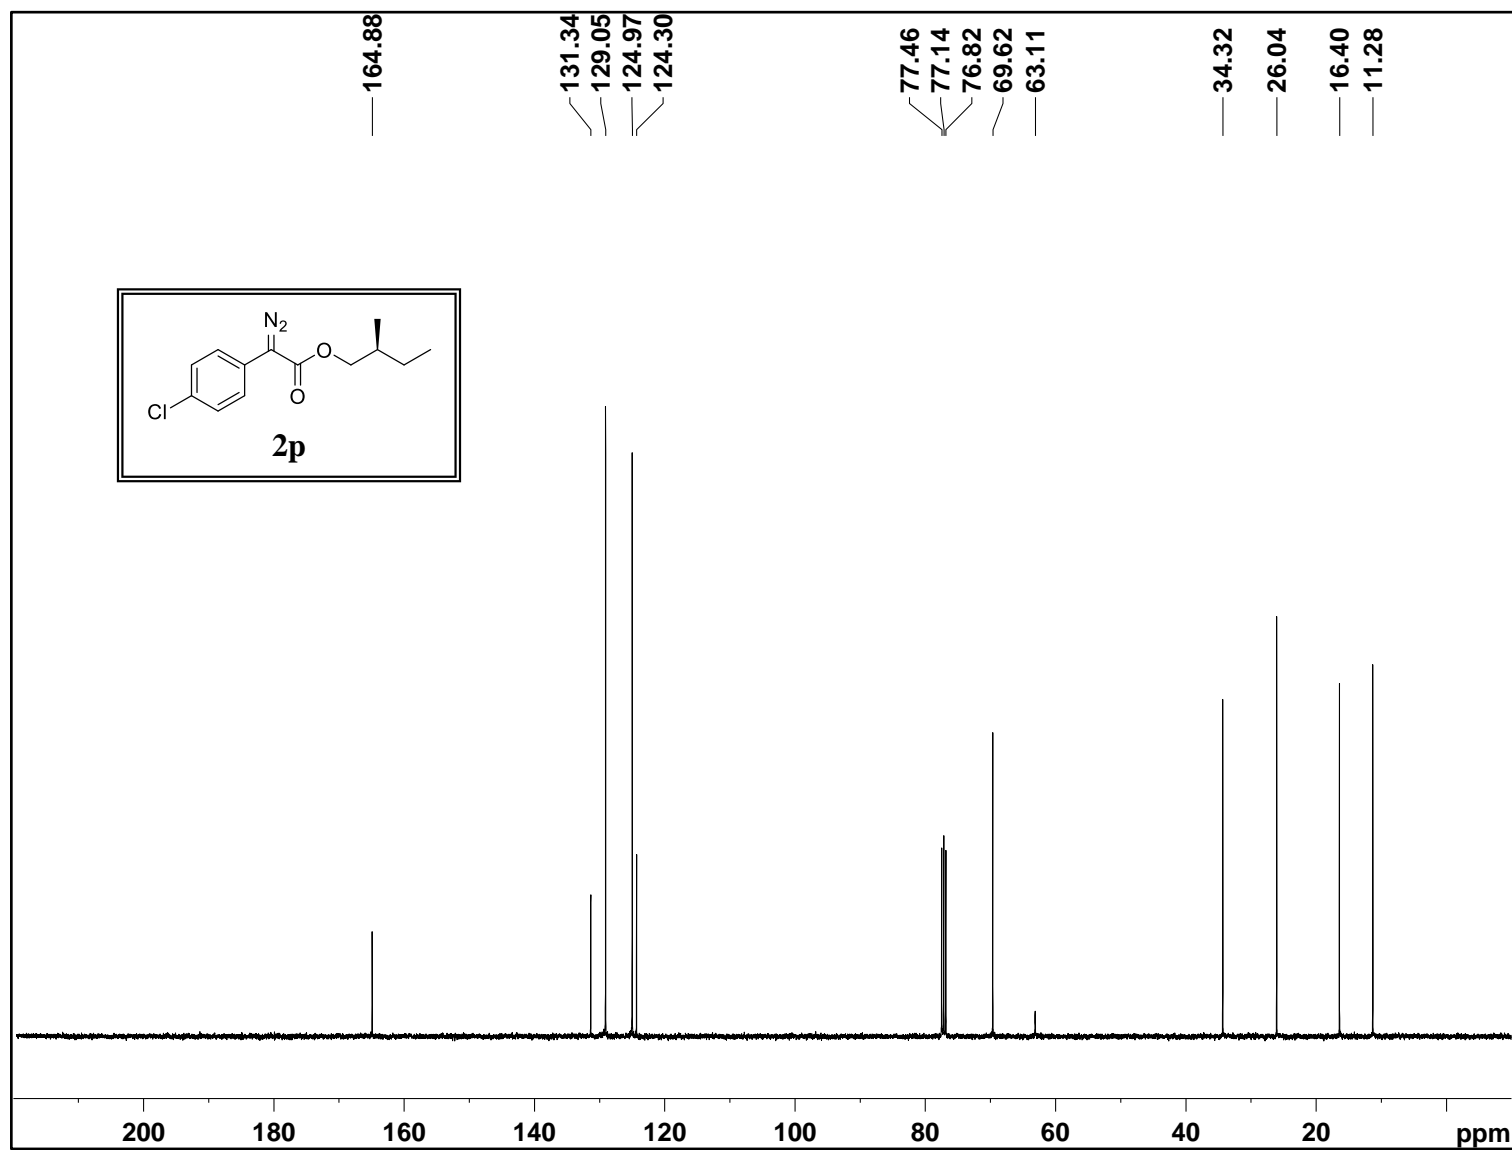

<sup>1</sup>H NMR for compound **S1q** (400 MHz, CDCl<sub>3</sub>) (data)

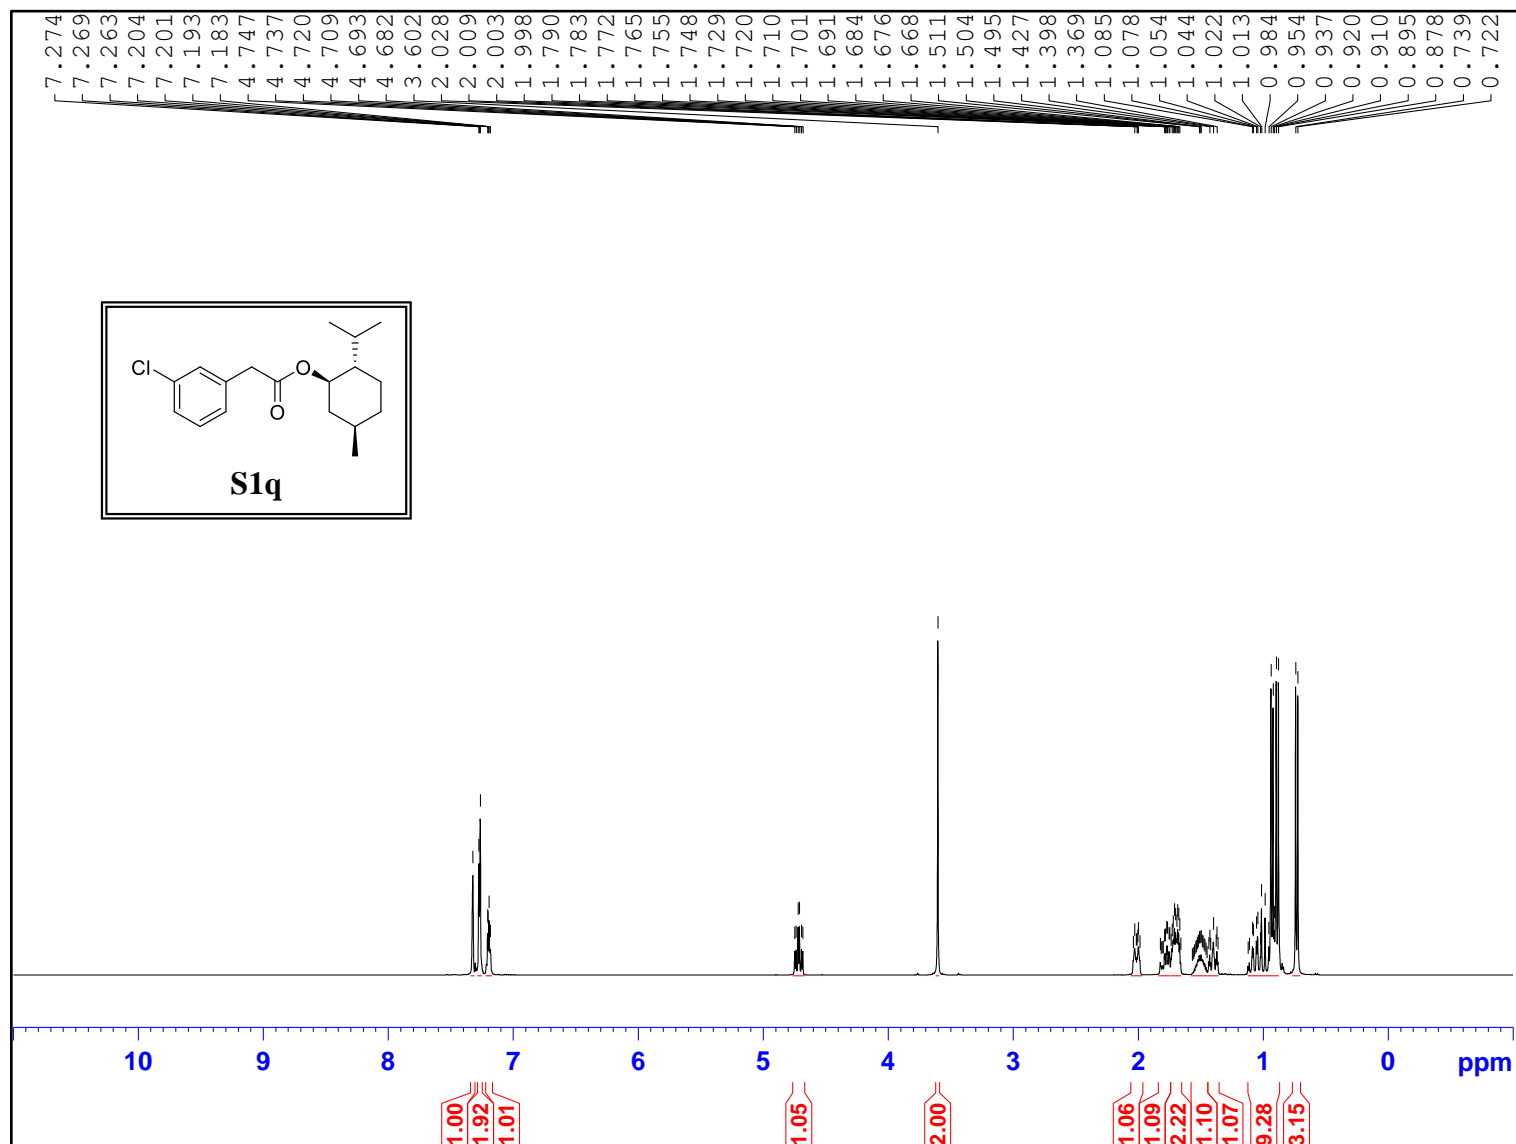

$^{13}\text{C}\{^1\text{H}\}$  NMR for compound **S1q** (101 MHz,  $\text{CDCl}_3$ )

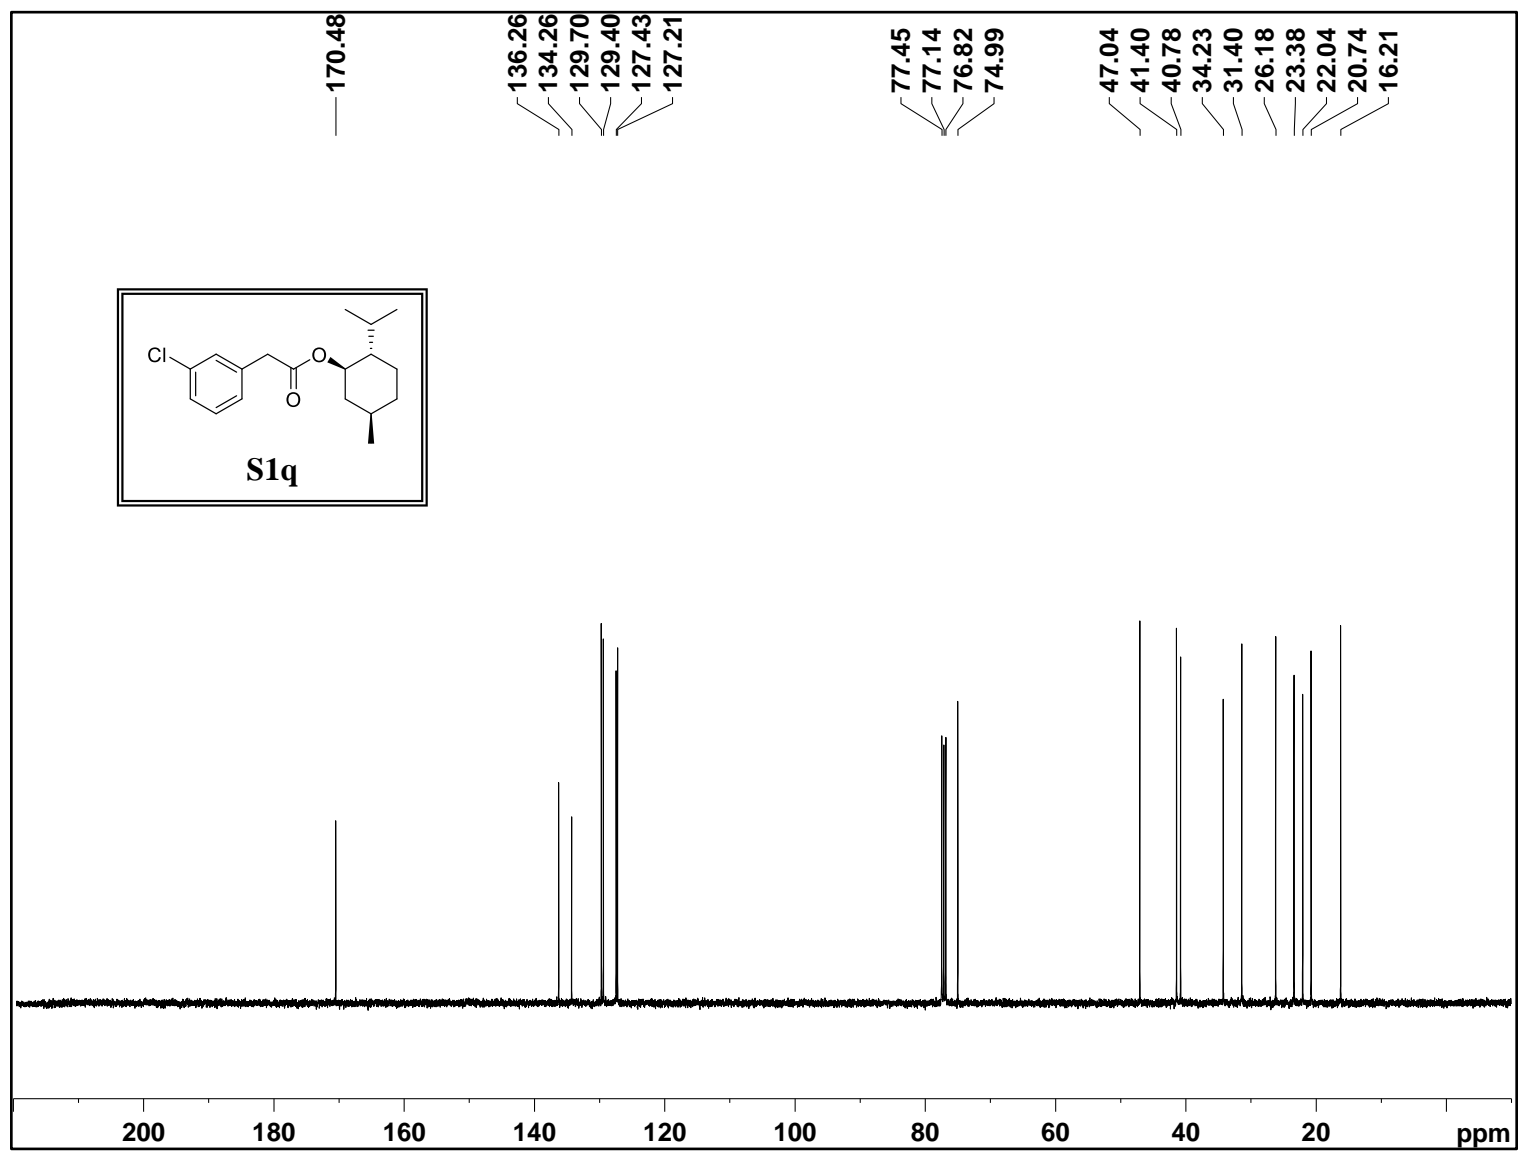



<sup>1</sup>H NMR for compound **2q** (400 MHz, CDCl<sub>3</sub>) (data)

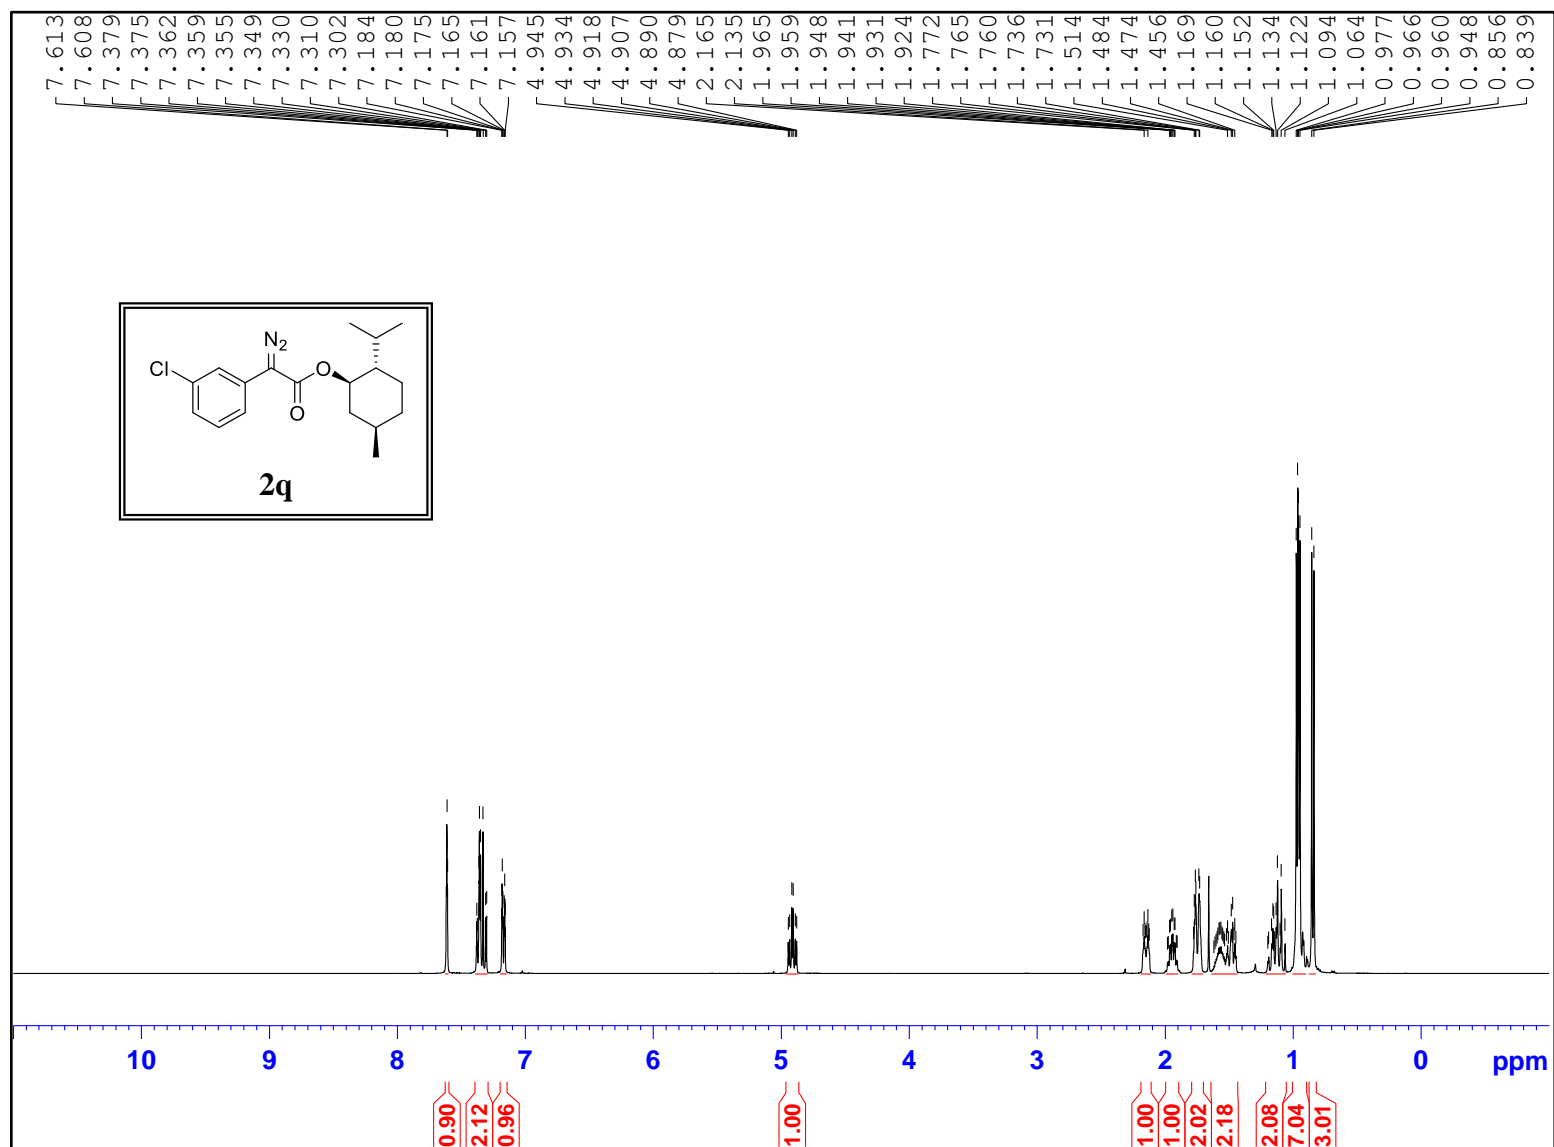

$^{13}\text{C}\{^1\text{H}\}$  NMR for compound **2q** (101 MHz,  $\text{CDCl}_3$ )

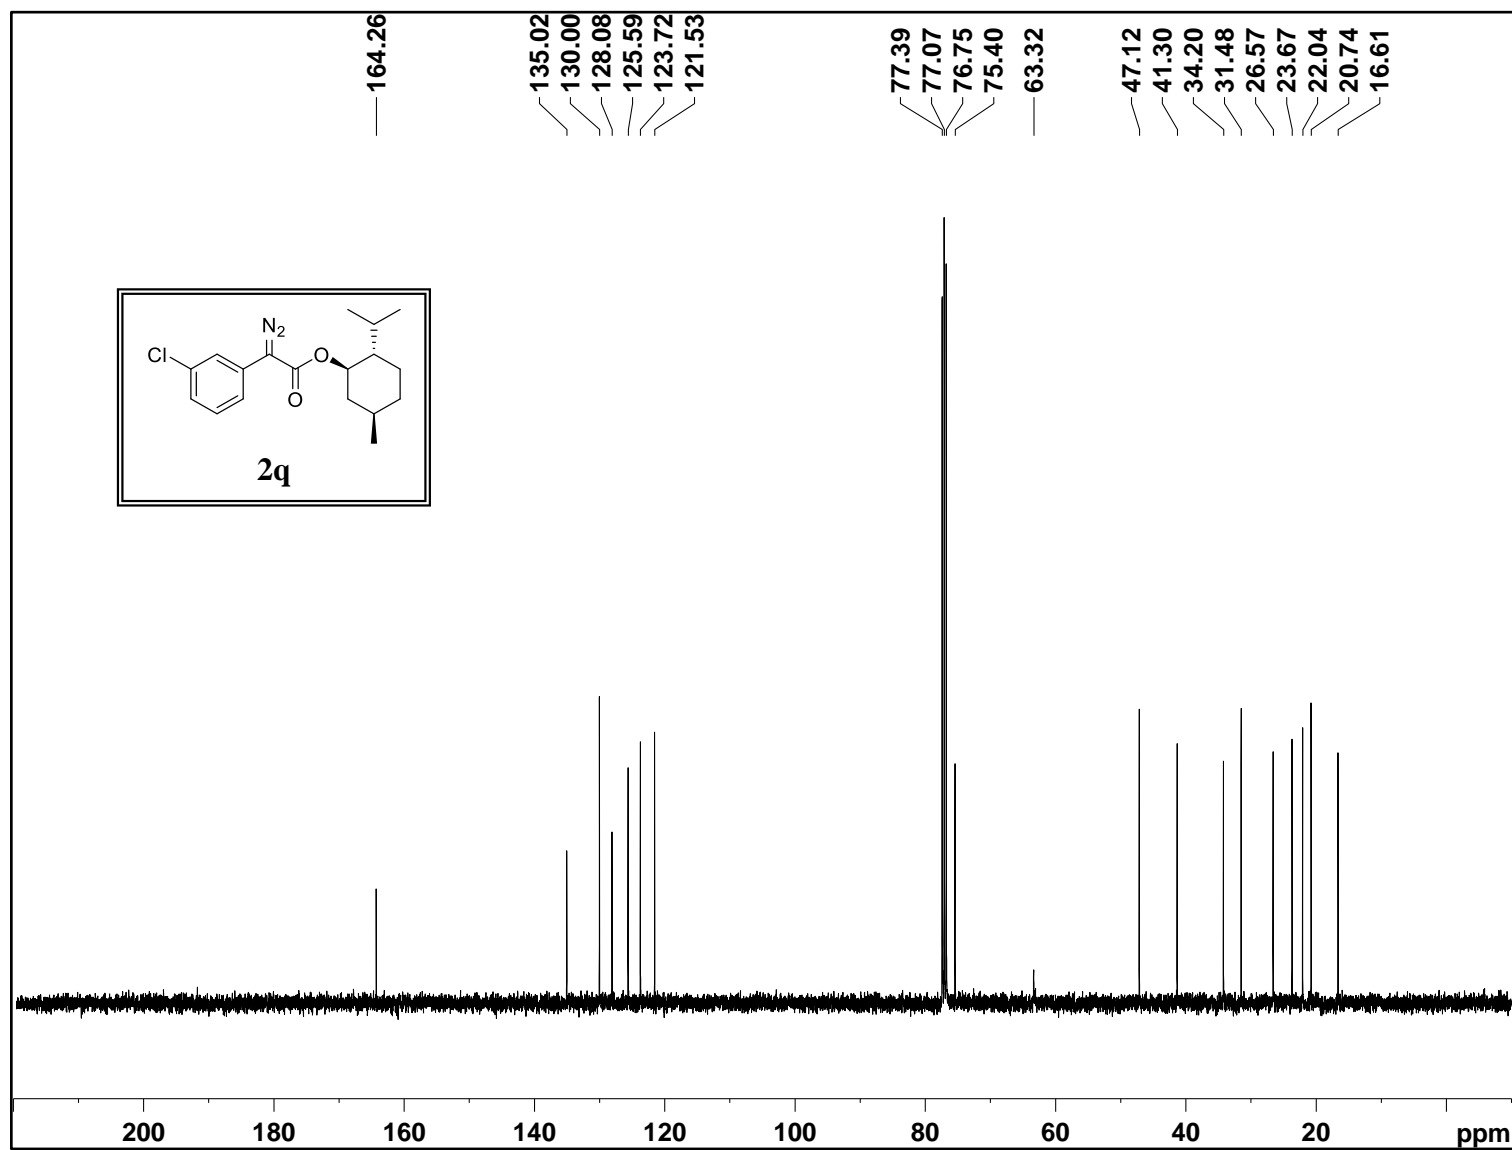

<sup>1</sup>H NMR for compound **3a** (400 MHz, CDCl<sub>3</sub>)

(data)

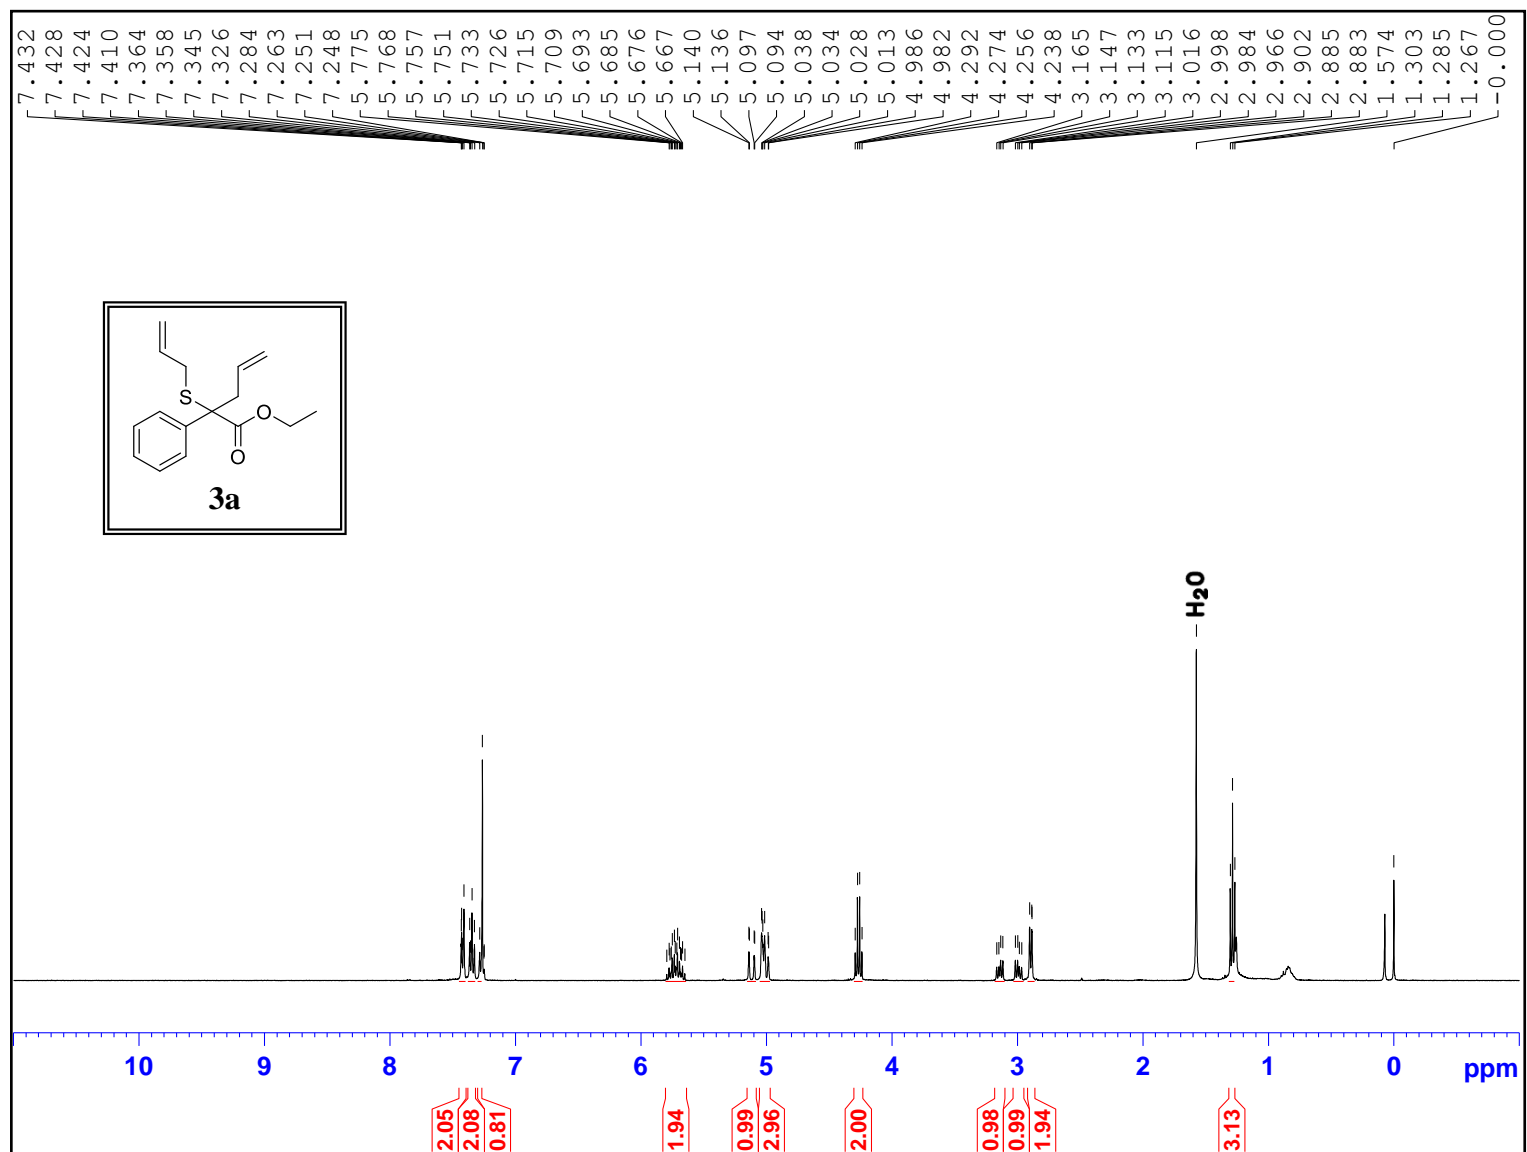

$^{13}\text{C}\{^1\text{H}\}$  NMR for compound **3a** (101 MHz,  $\text{CDCl}_3$ )

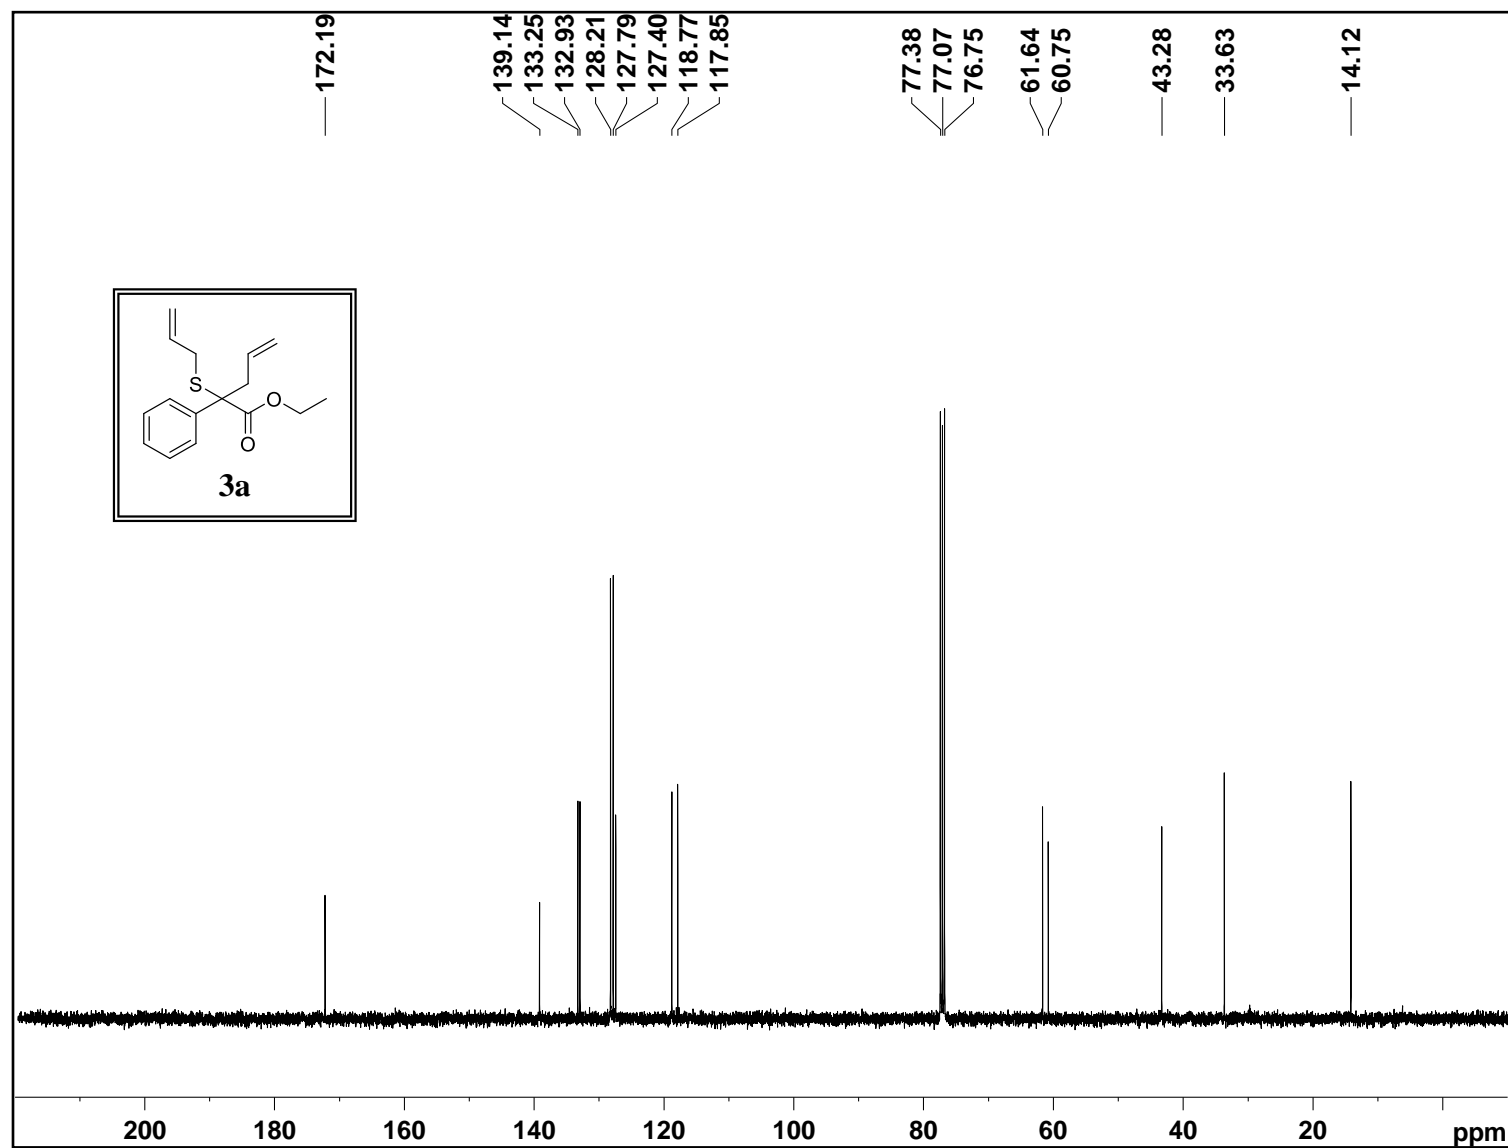

<sup>1</sup>H NMR for compound **3b** (400 MHz, CDCl<sub>3</sub>) (data)

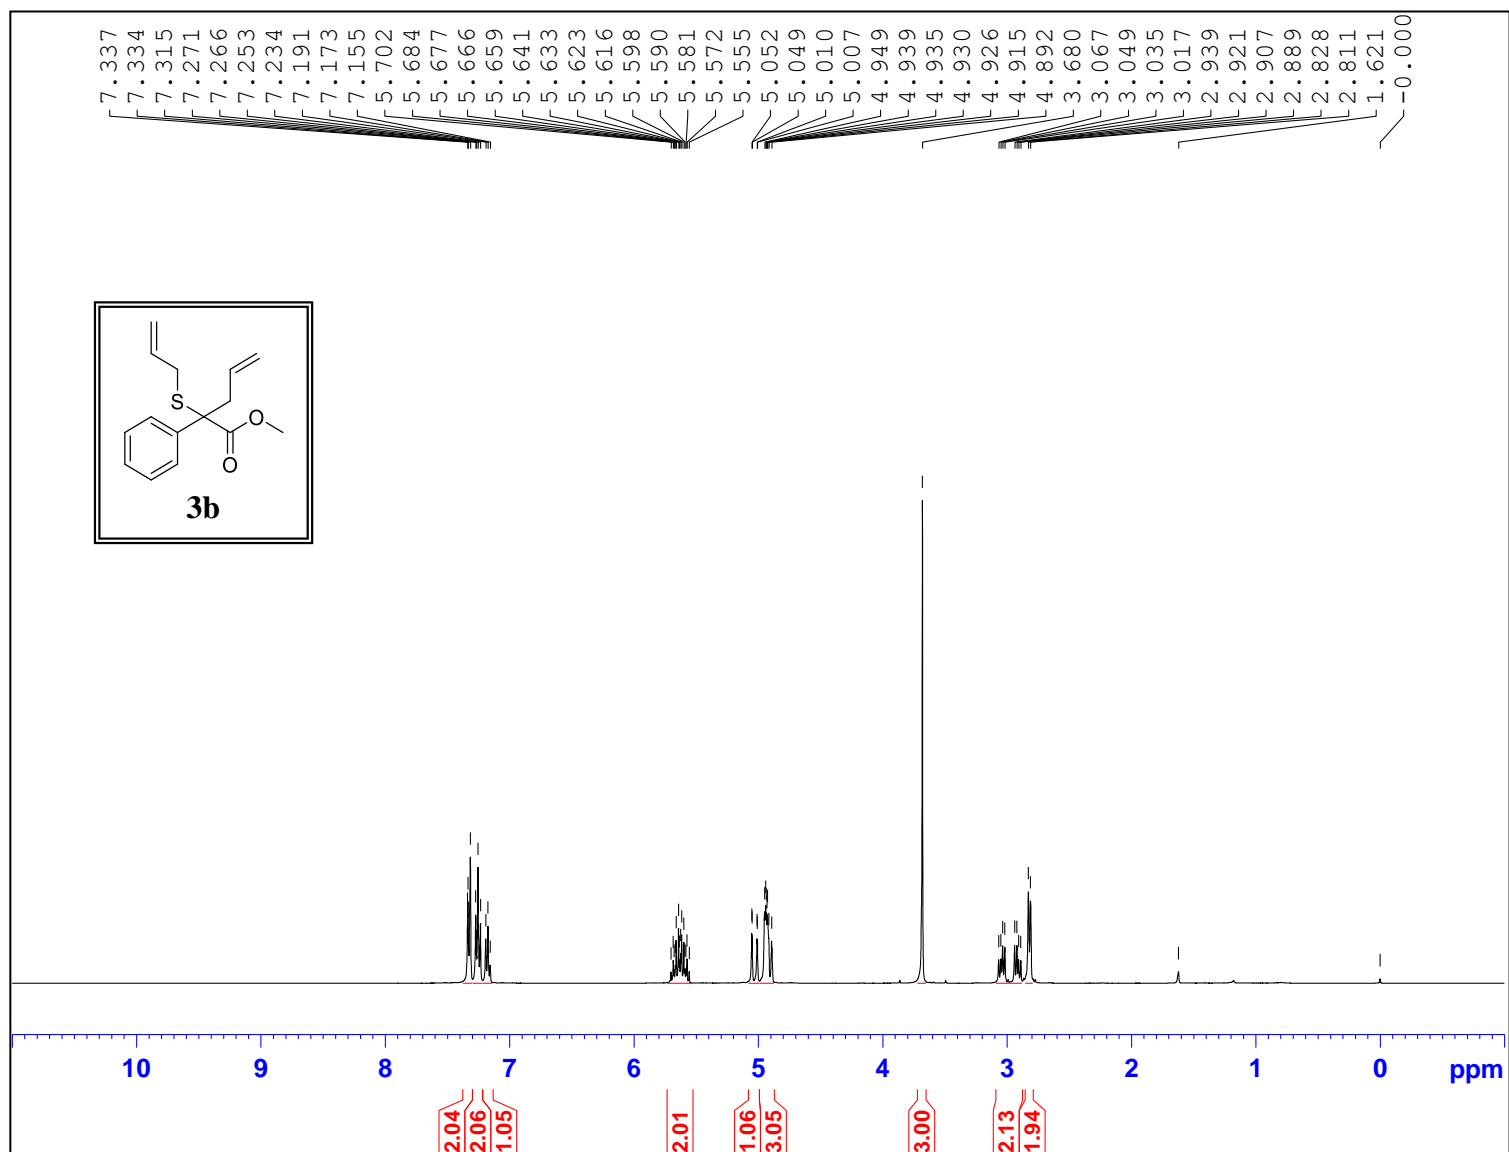

$^{13}\text{C}\{^1\text{H}\}$  NMR for compound **3b** (101 MHz,  $\text{CDCl}_3$ )

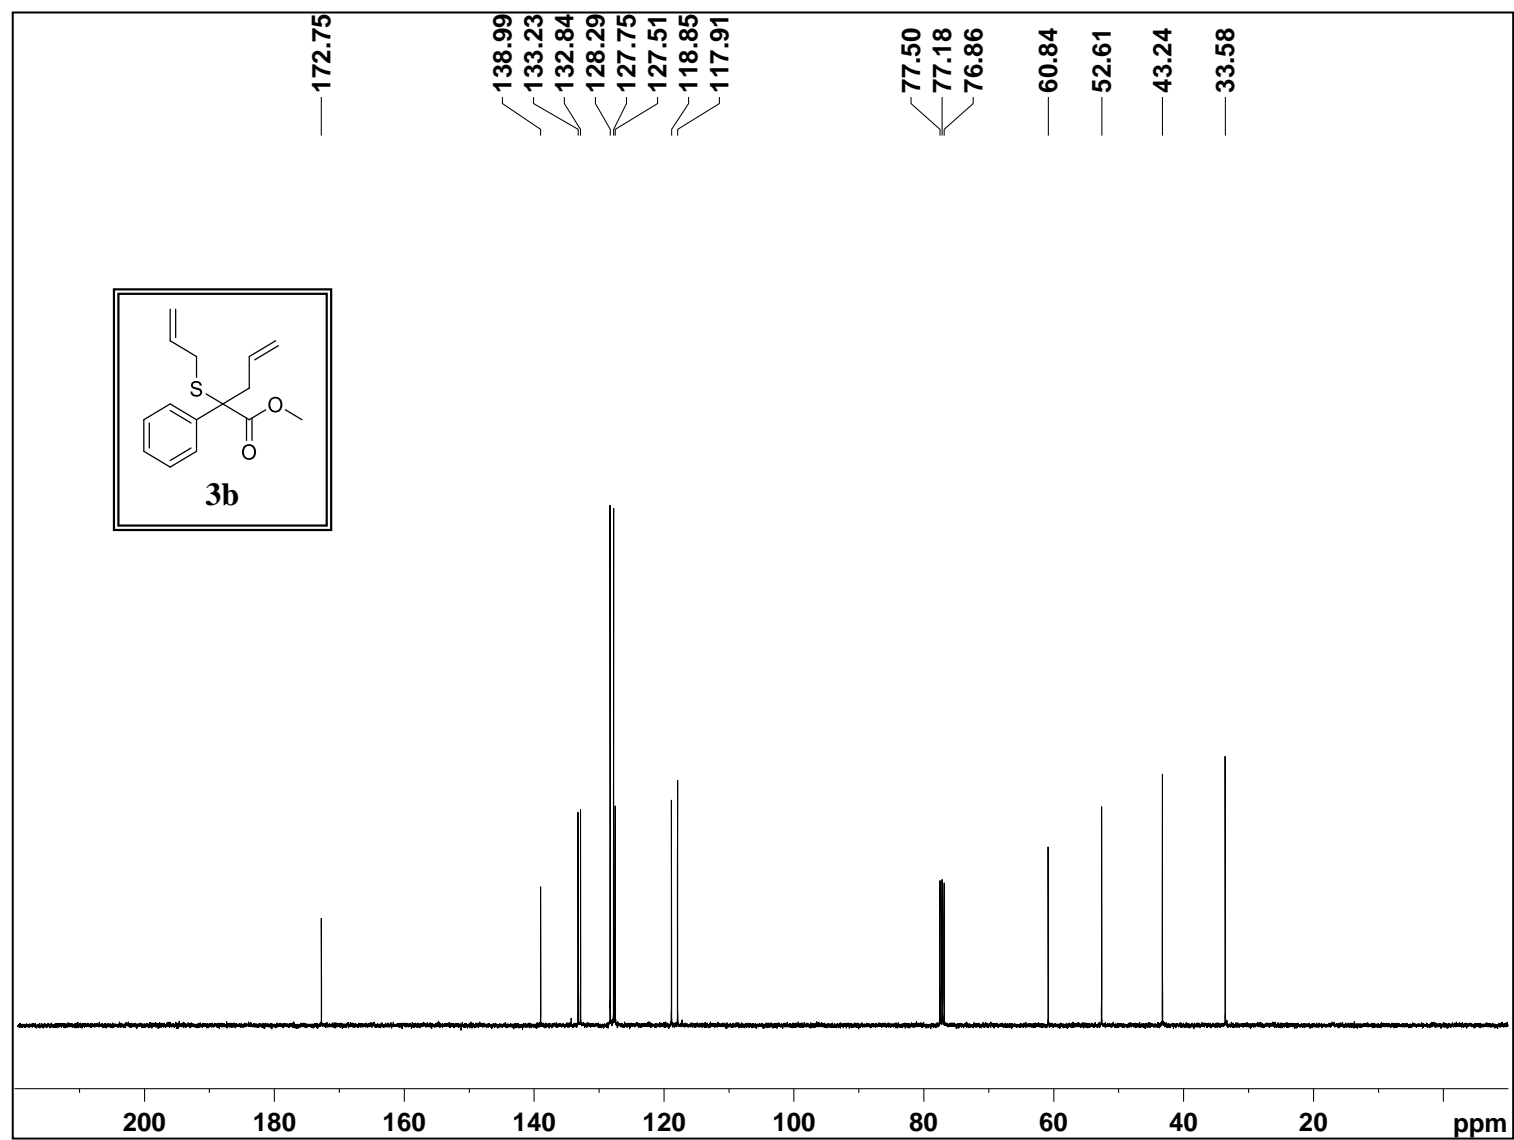

<sup>1</sup>H NMR for compound **3c** (400 MHz, CDCl<sub>3</sub>)

(data)

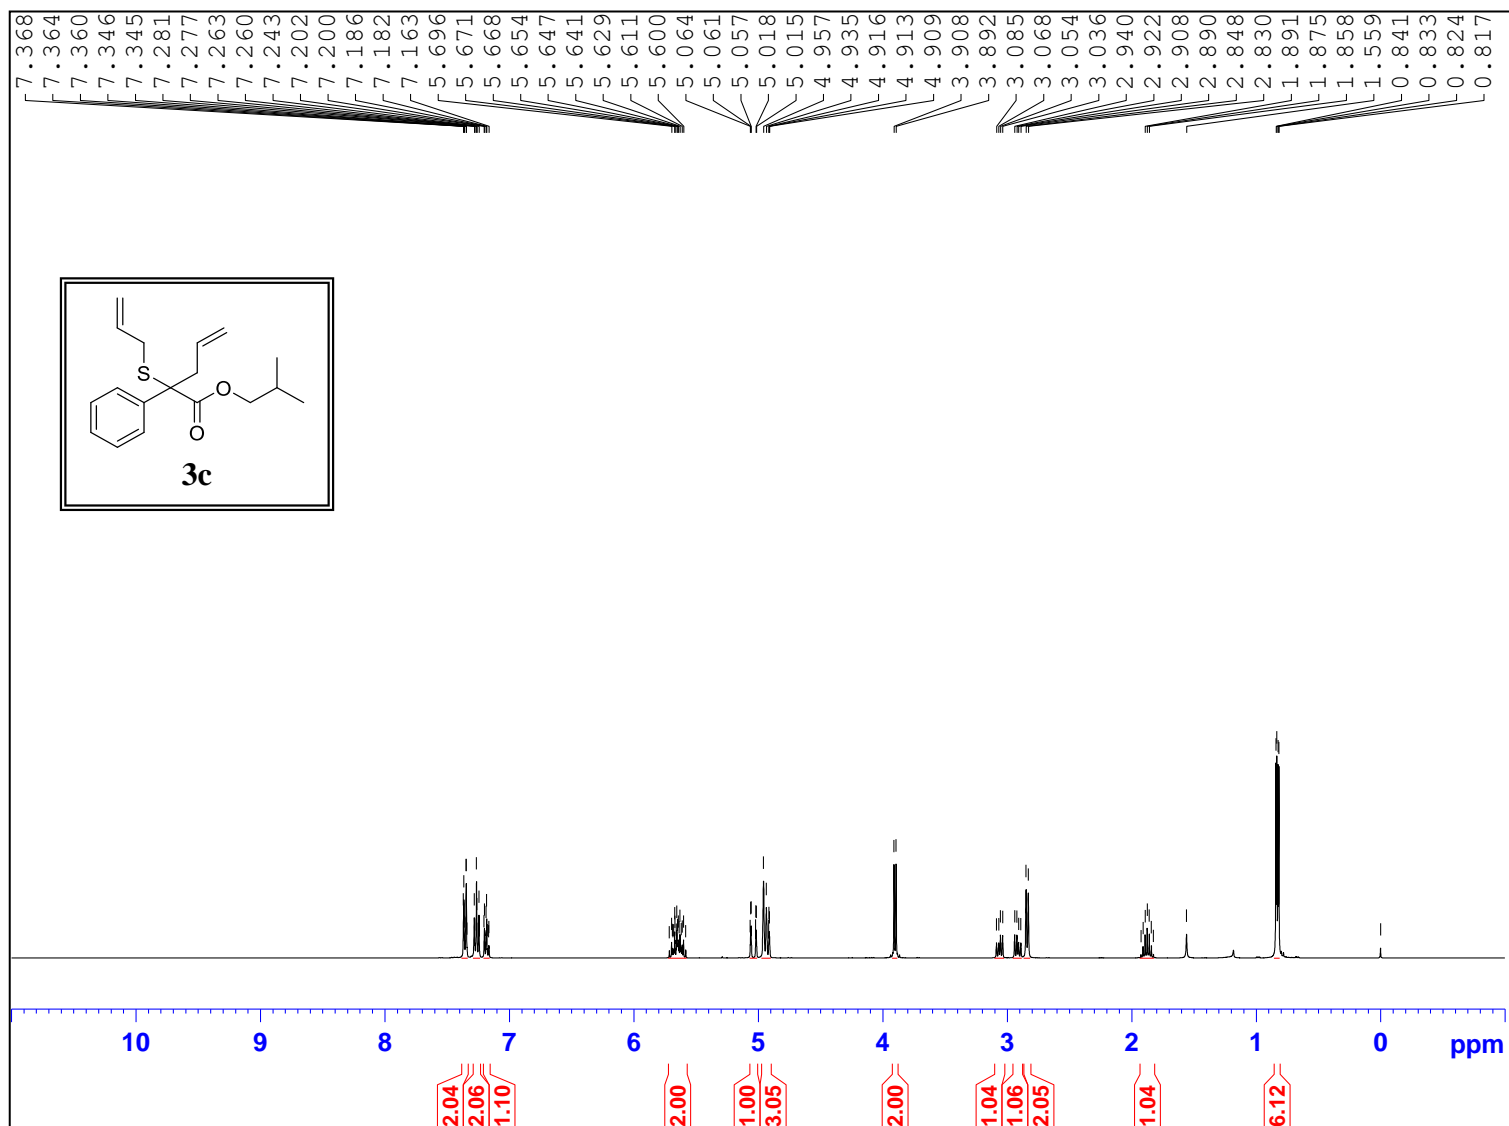

$^{13}\text{C}\{^1\text{H}\}$  NMR for compound **3c** (101 MHz,  $\text{CDCl}_3$ )

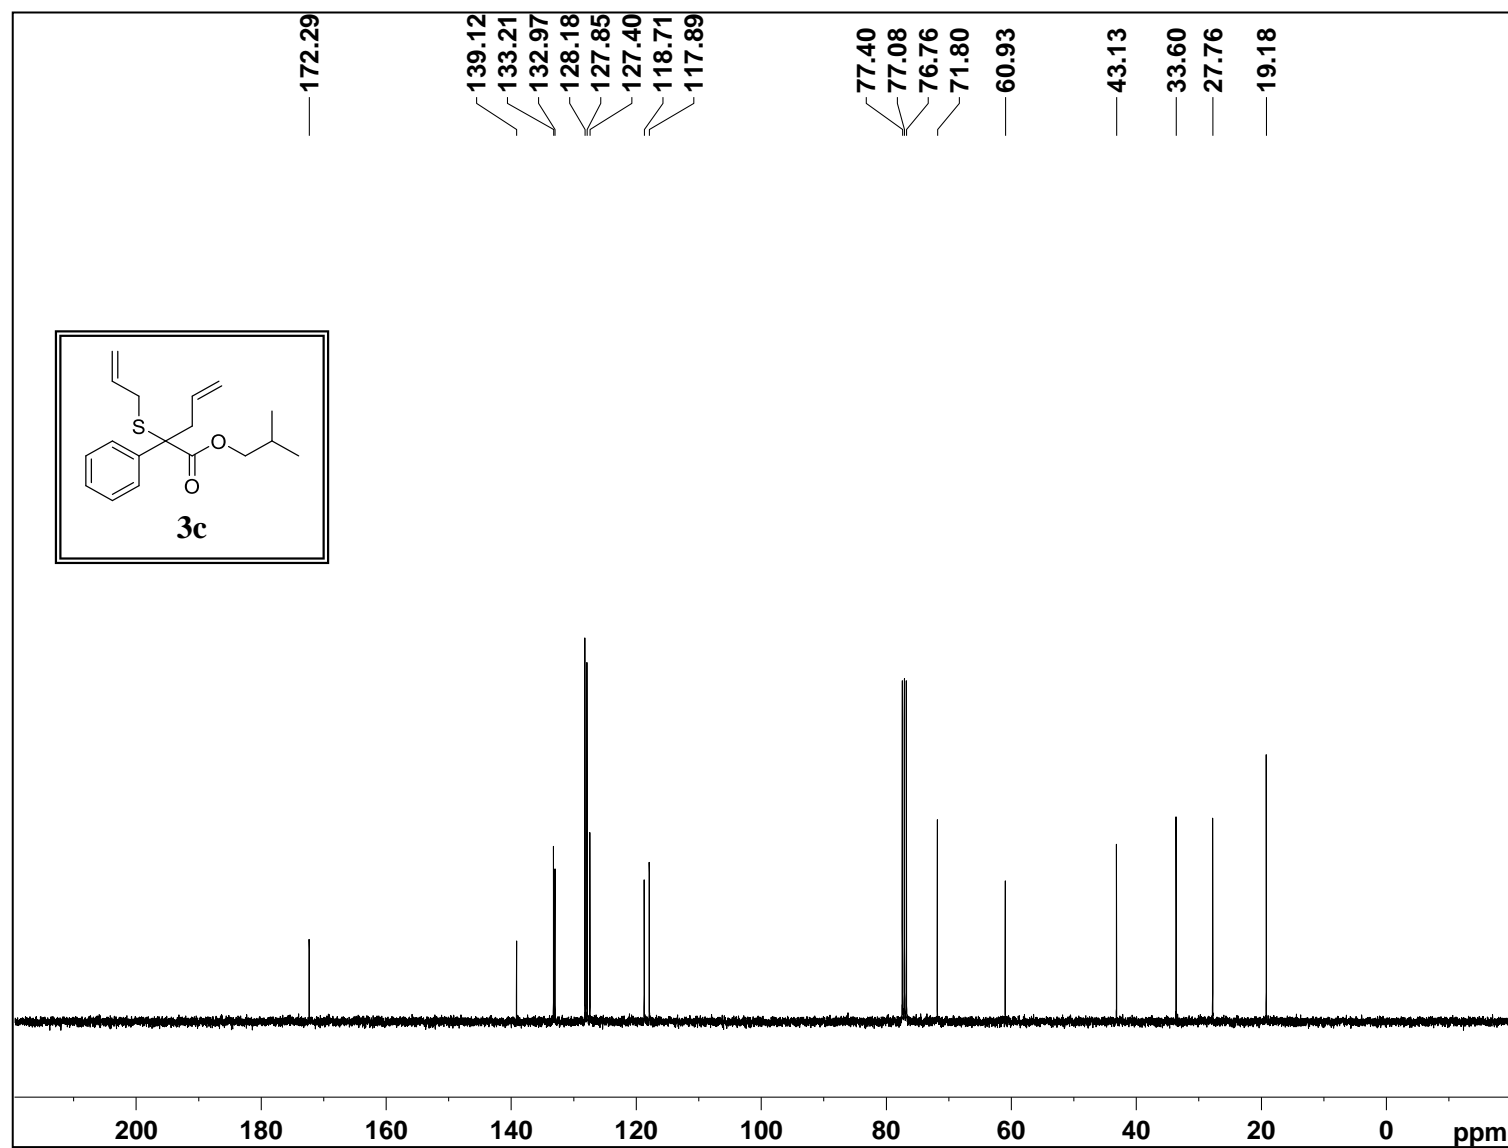



<sup>1</sup>H NMR for compound **3d** (400 MHz, CDCl<sub>3</sub>) (data)

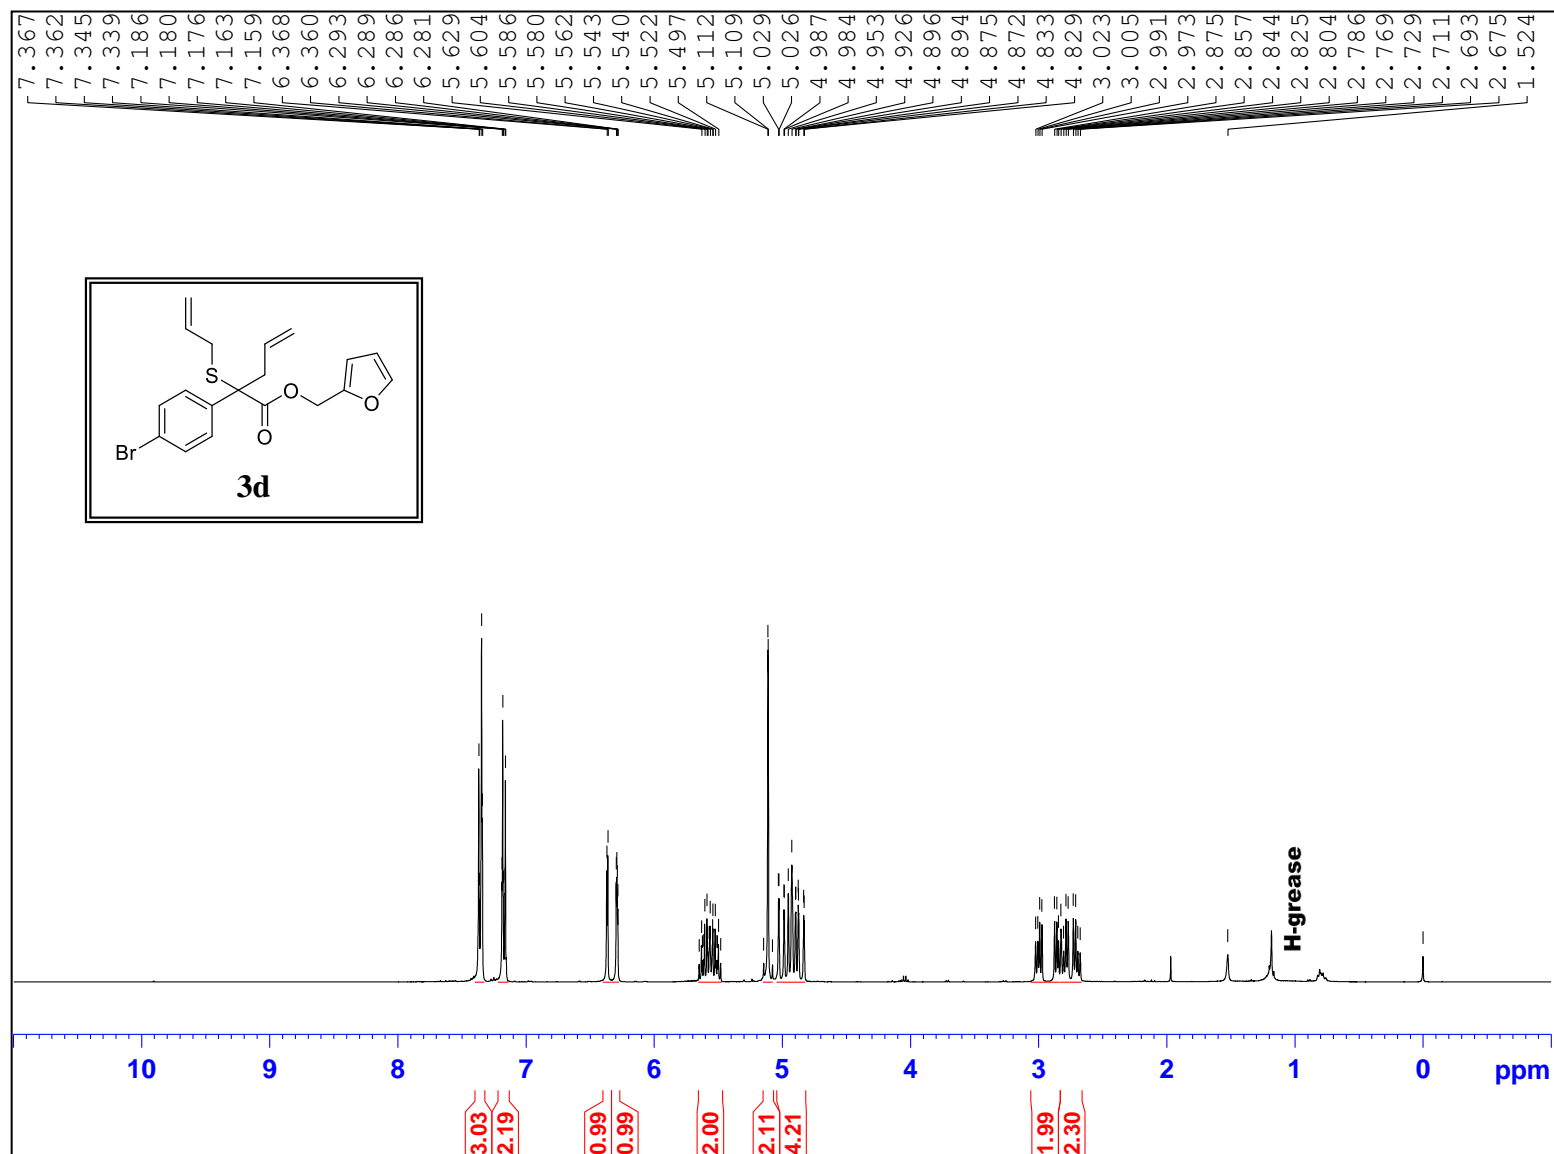

$^{13}\text{C}\{^1\text{H}\}$  NMR for compound **3d** (101 MHz,  $\text{CDCl}_3$ )

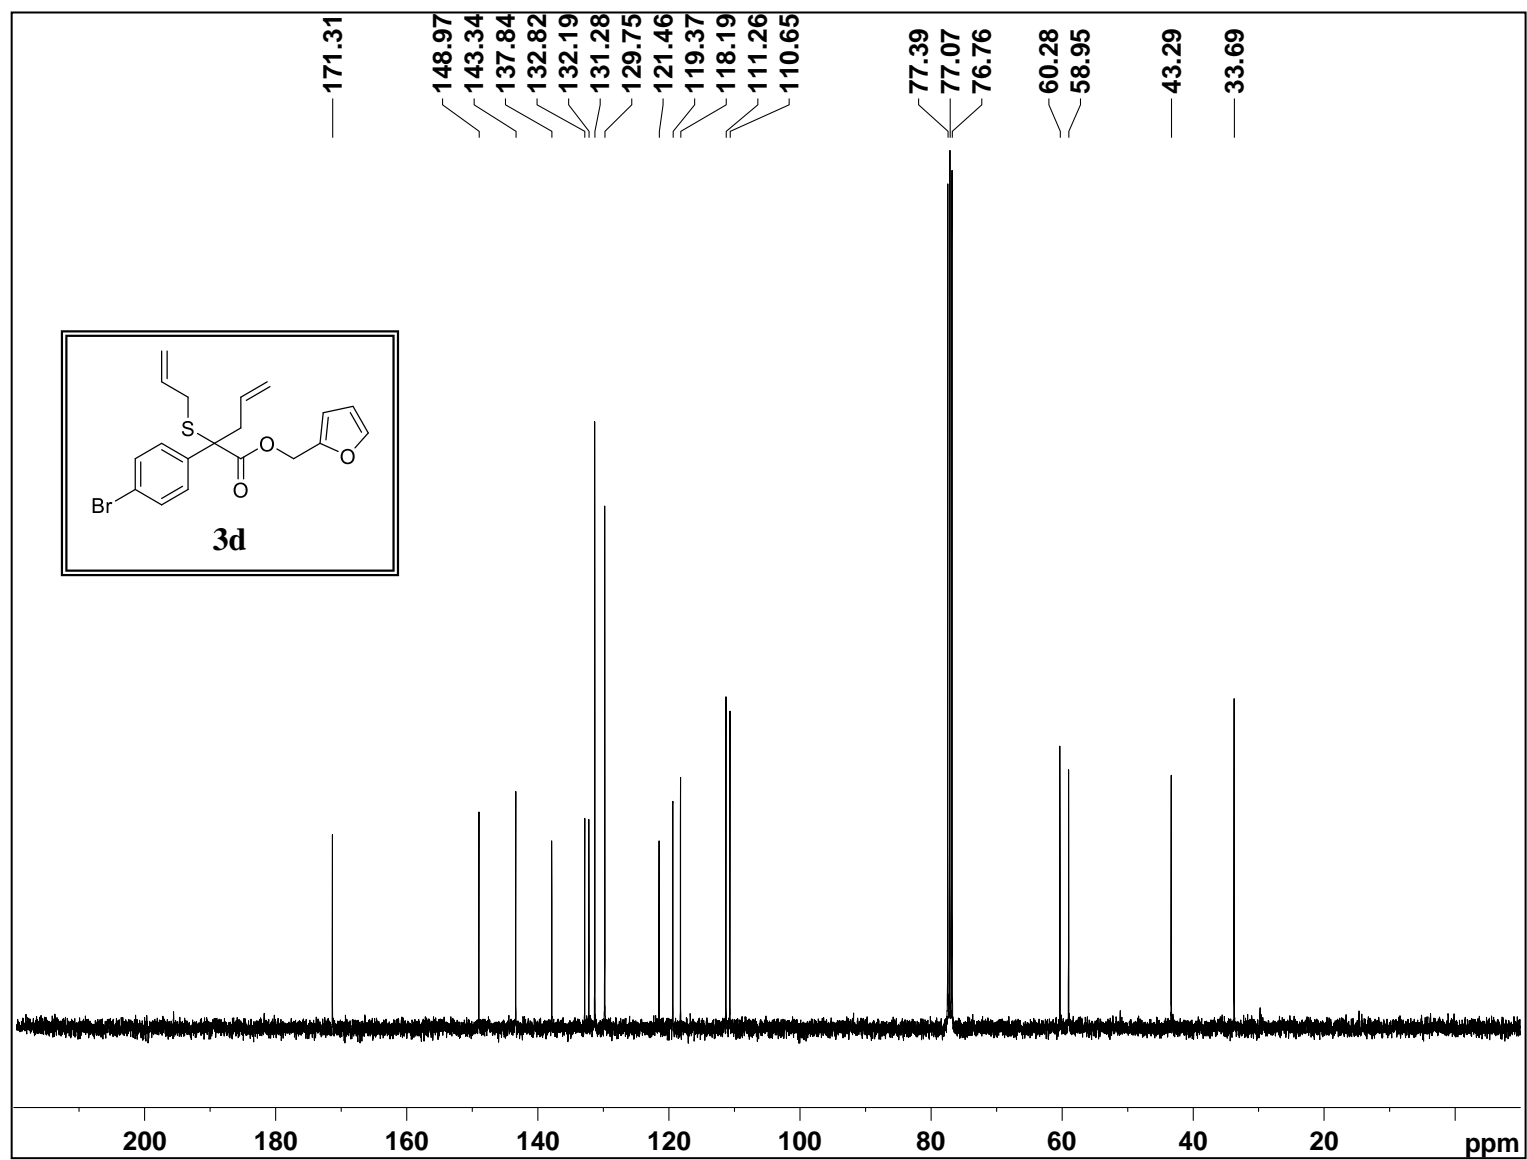

<sup>1</sup>H NMR for compound **3e** (400 MHz, CDCl<sub>3</sub>)

(data)

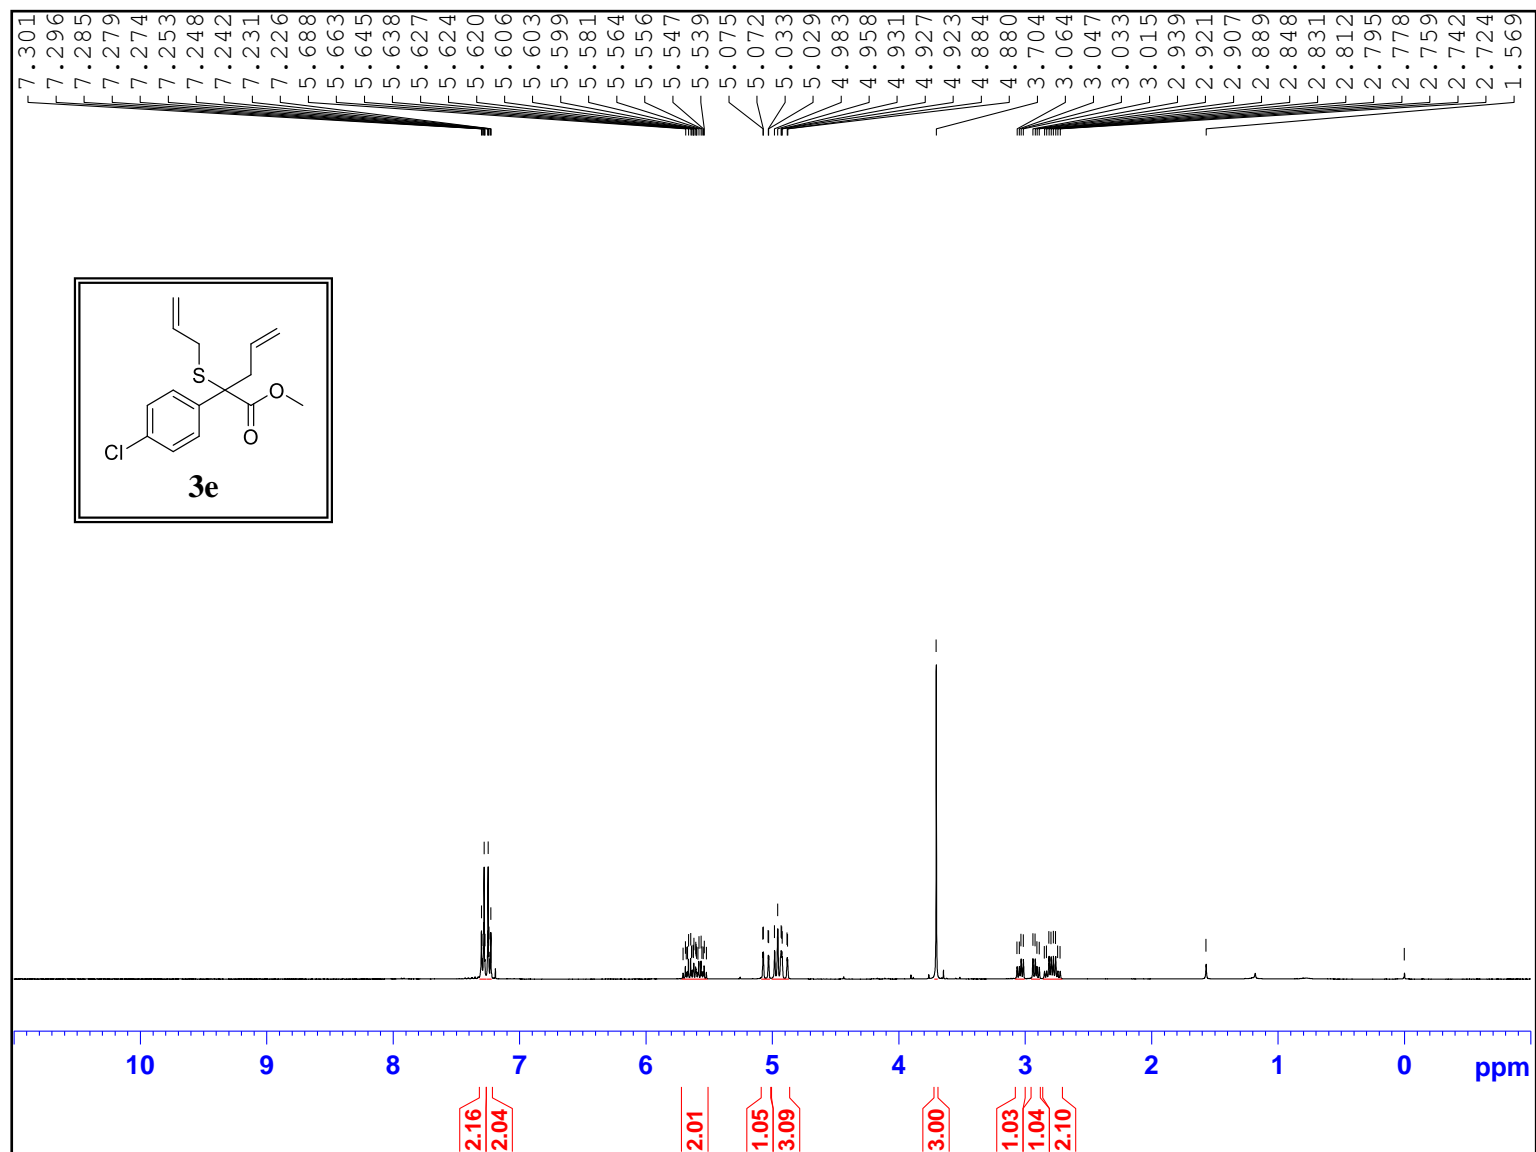

$^{13}\text{C}\{^1\text{H}\}$  NMR for compound **3e** (101 MHz,  $\text{CDCl}_3$ )

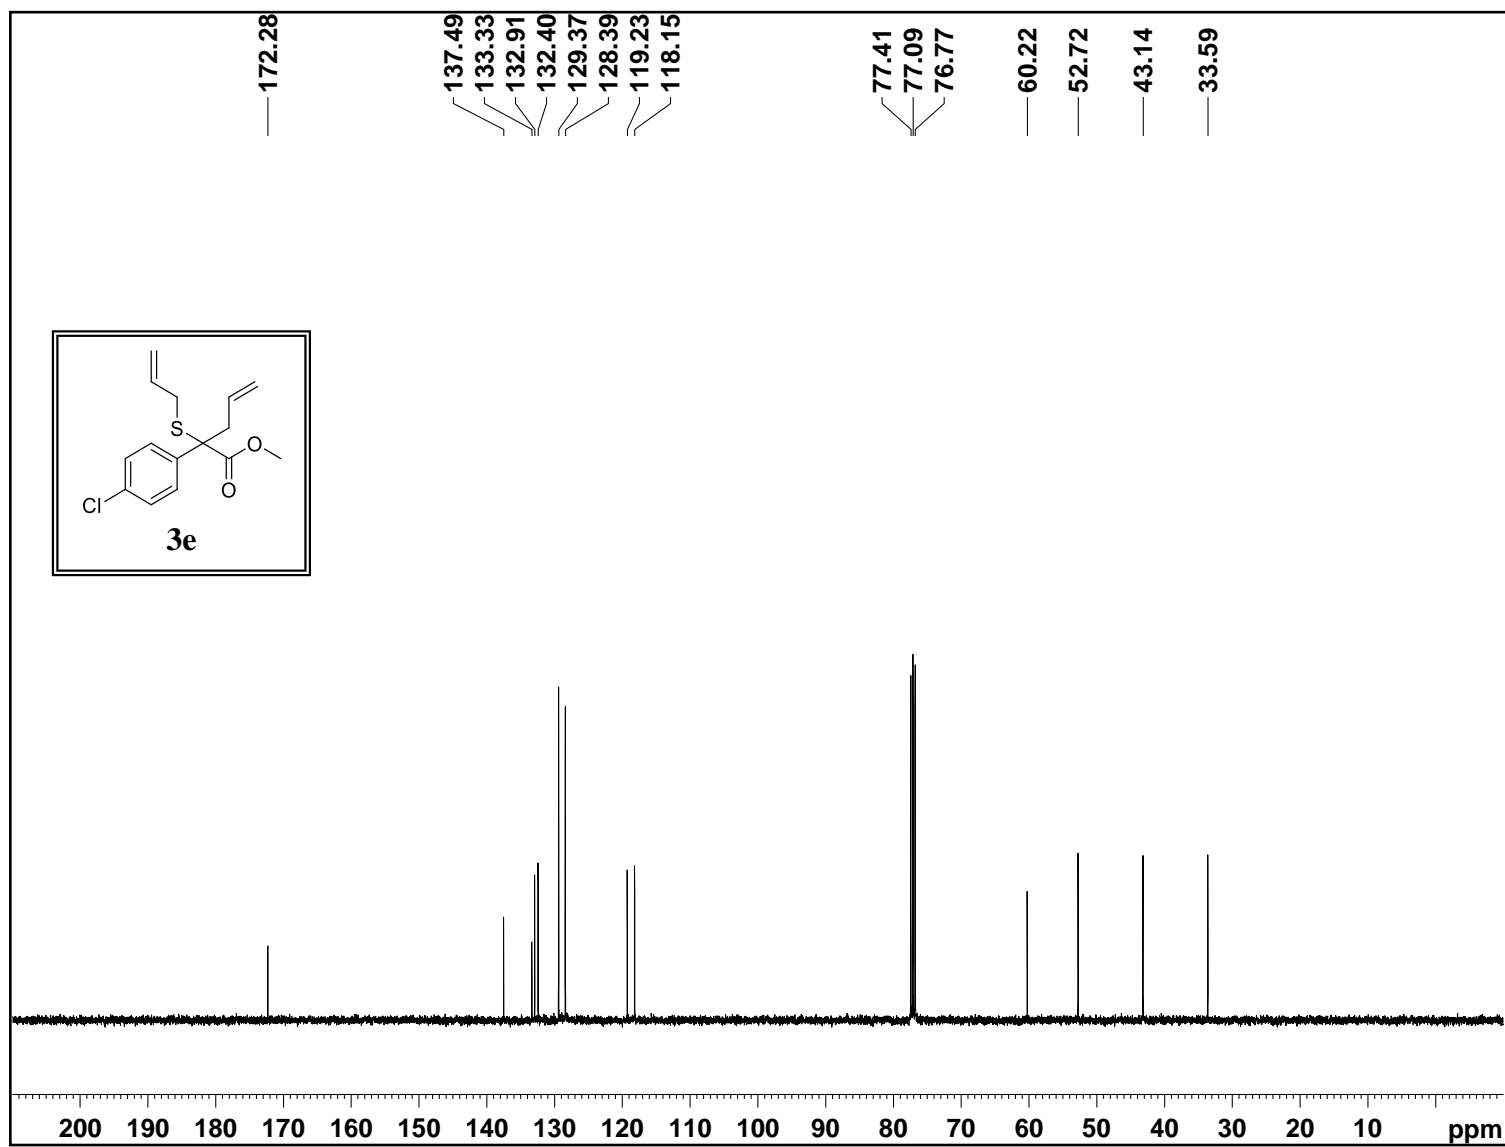

<sup>1</sup>H NMR for compound **3f** (400 MHz, CDCl<sub>3</sub>)

(data)

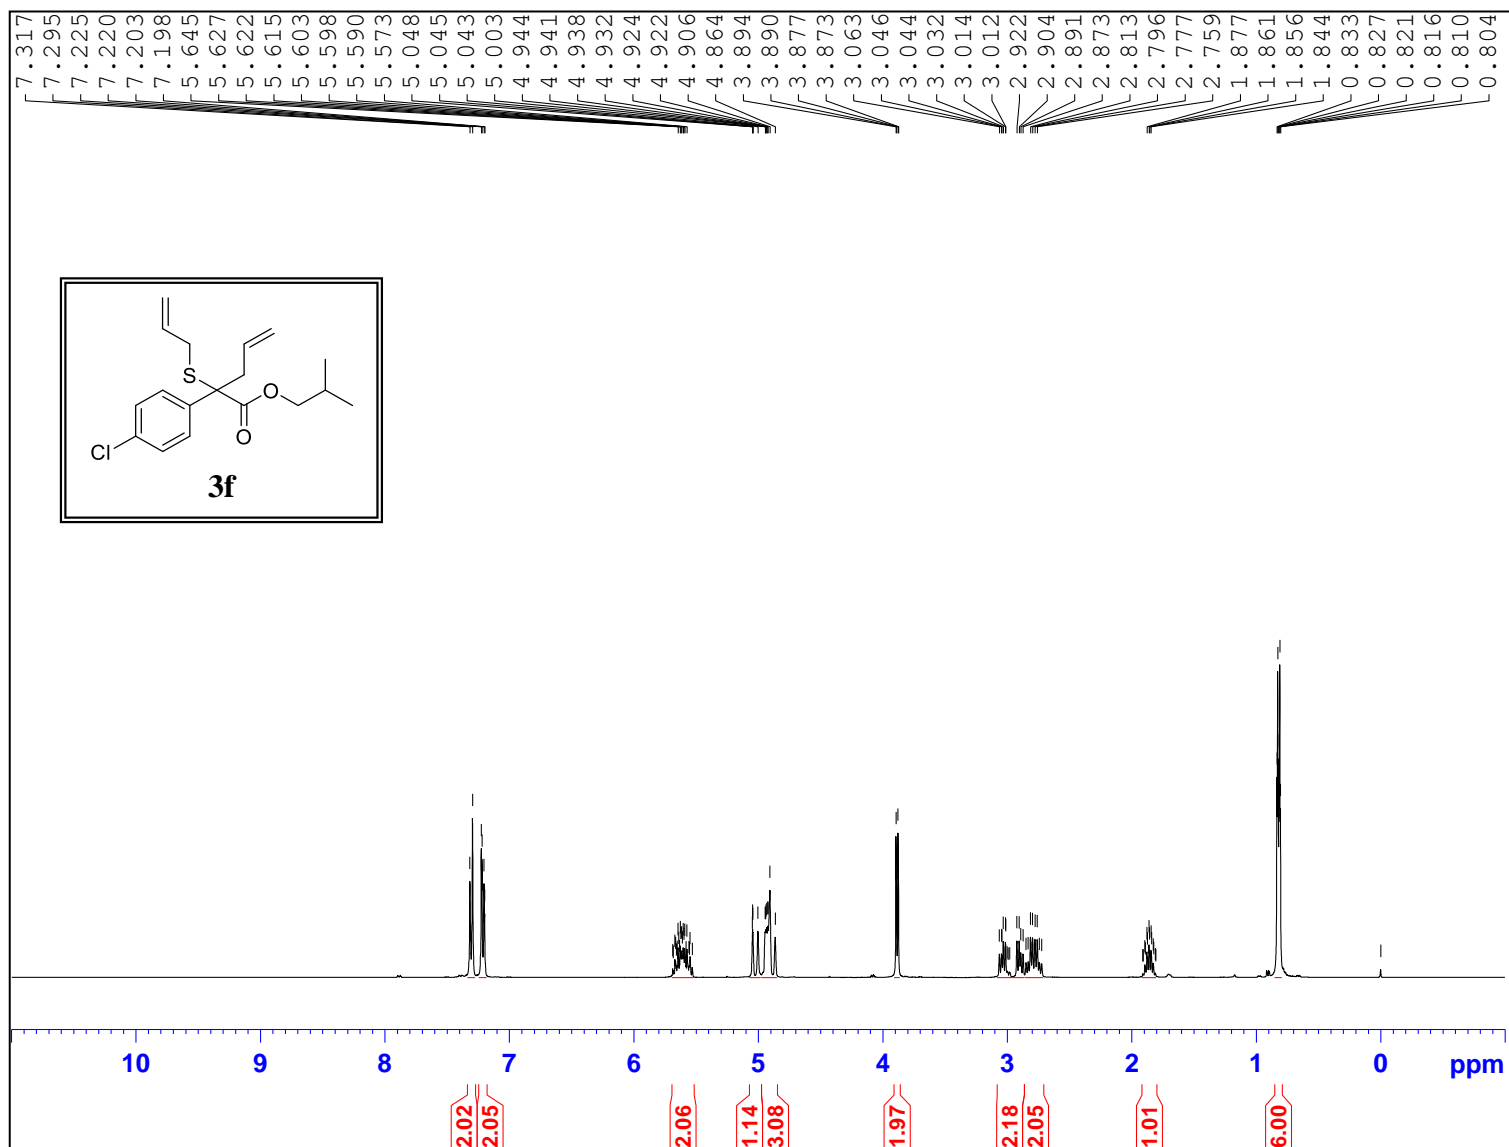

$^{13}\text{C}\{^1\text{H}\}$  NMR for compound **3f** (101 MHz,  $\text{CDCl}_3$ )

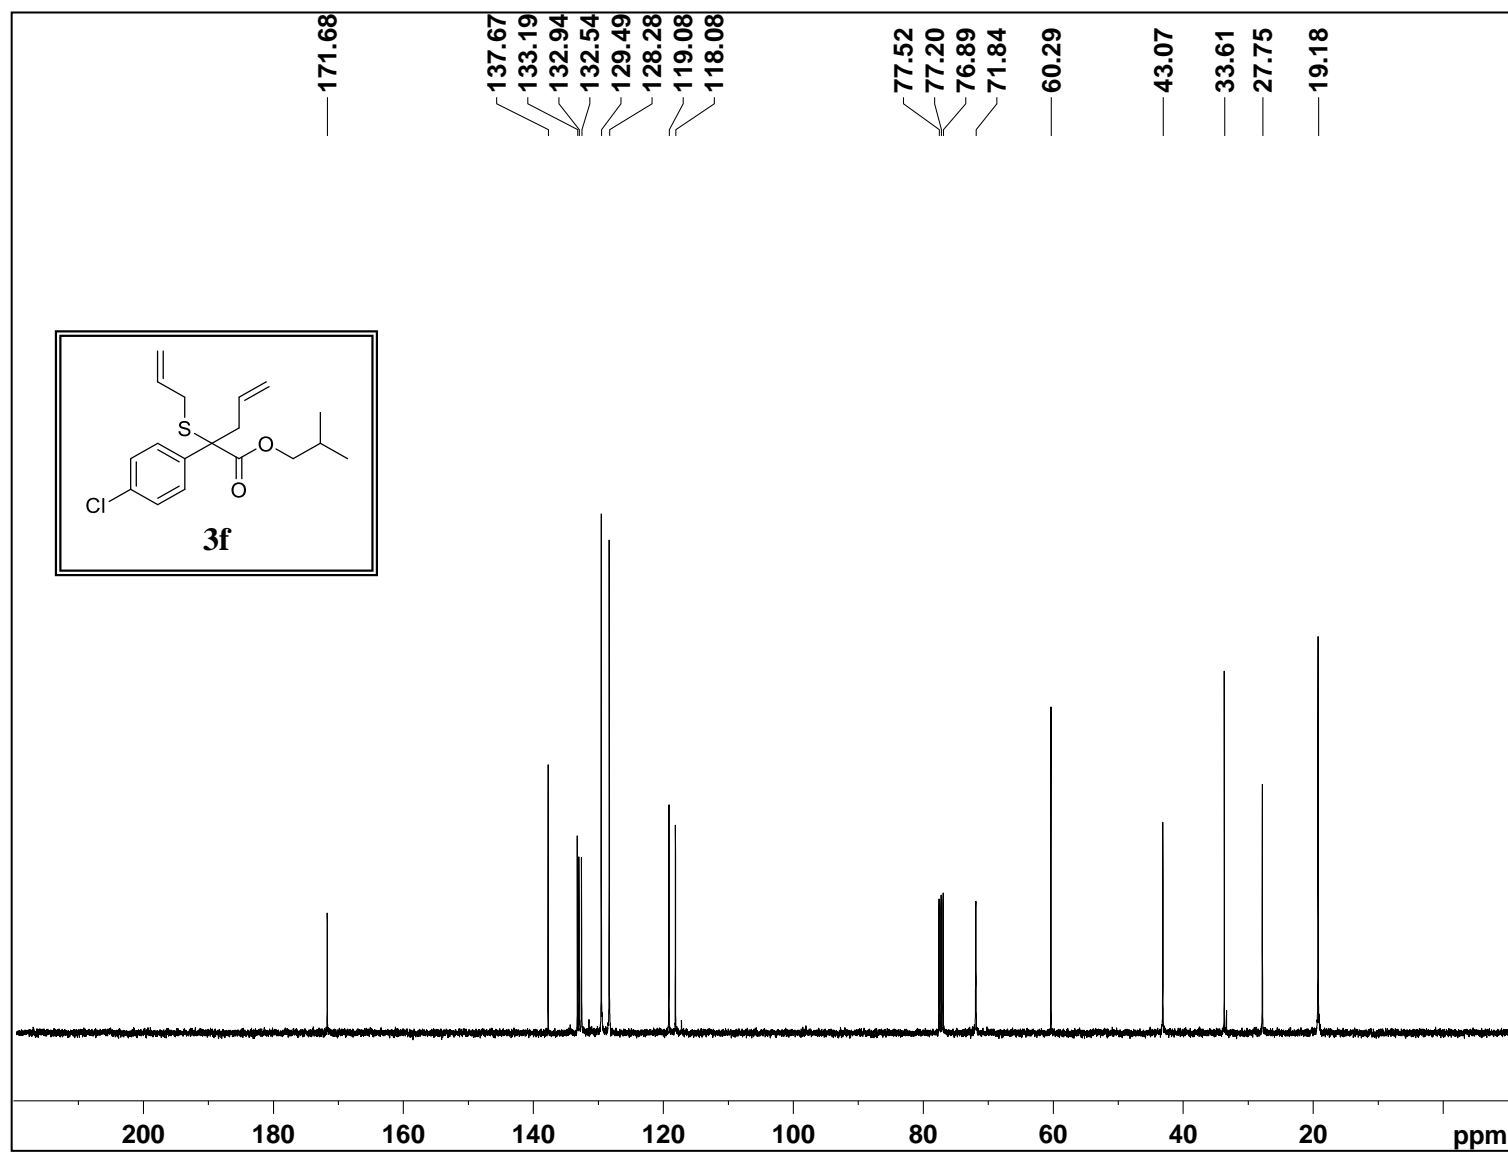

<sup>1</sup>H NMR for compound **3g** (400 MHz, CDCl<sub>3</sub>) (data)

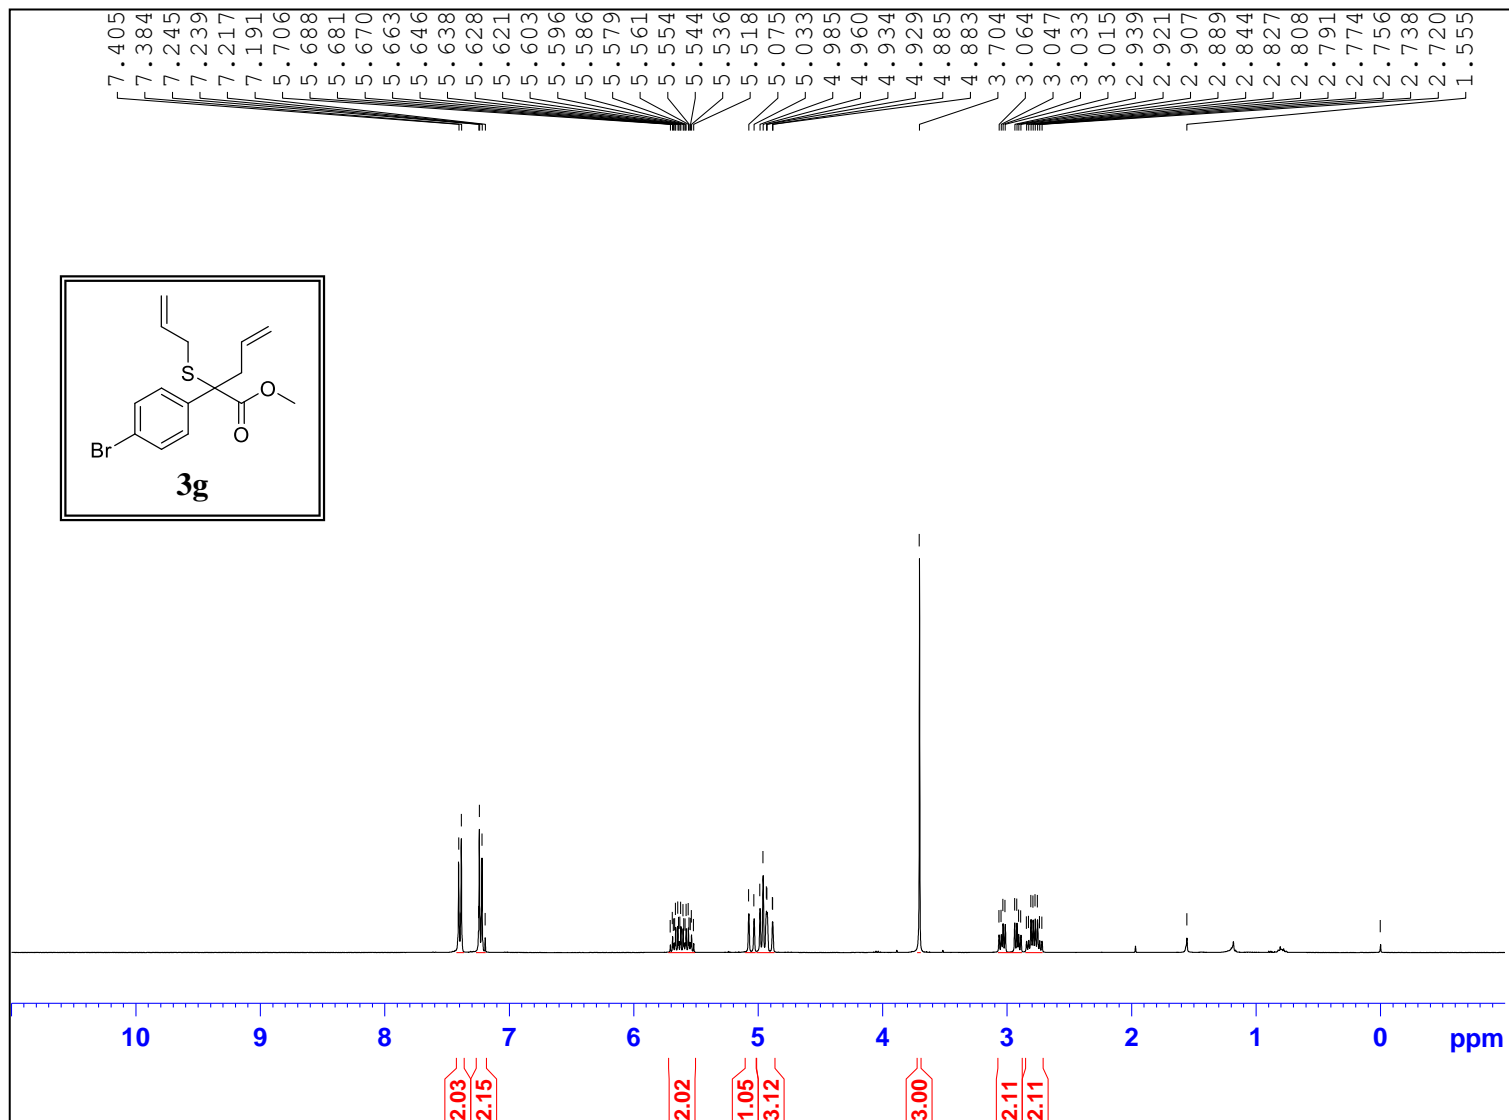

$^{13}\text{C}\{^1\text{H}\}$  NMR for compound **3g** (101 MHz,  $\text{CDCl}_3$ )

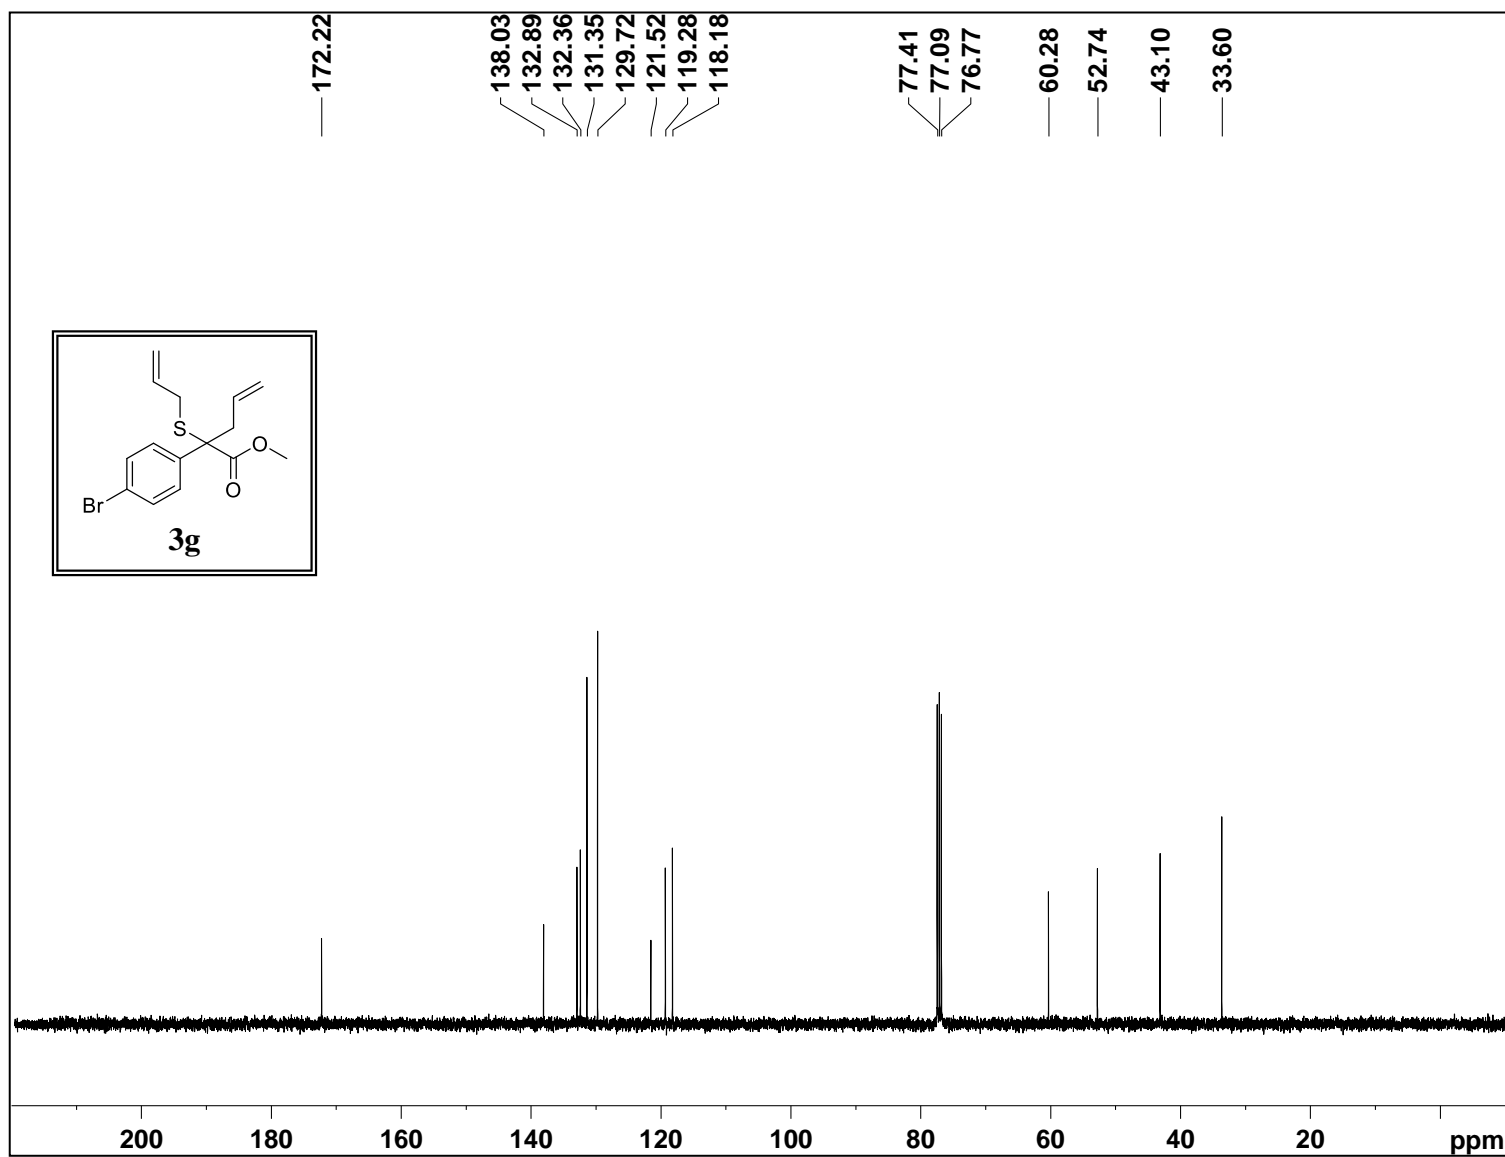



<sup>1</sup>H NMR for compound **3h** (400 MHz, CDCl<sub>3</sub>) (data)

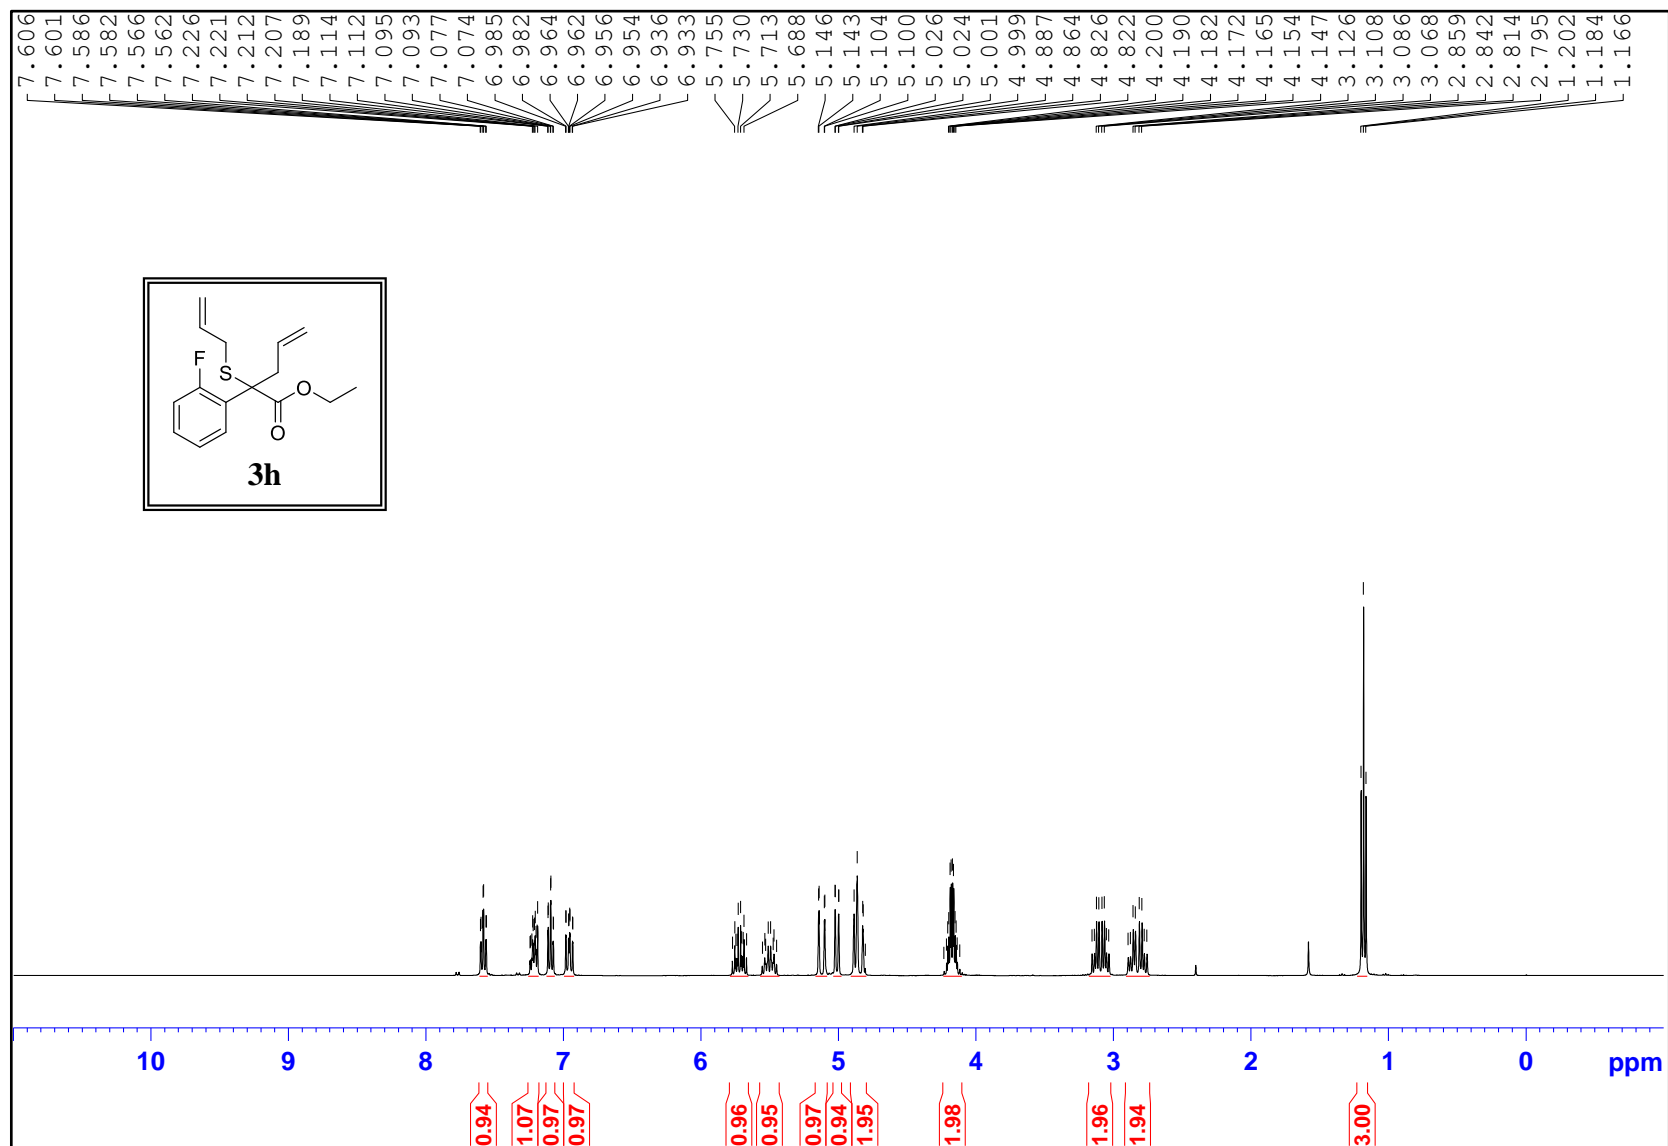

$^{13}\text{C}\{^1\text{H}\}$  NMR for compound **3h** (101 MHz,  $\text{CDCl}_3$ )

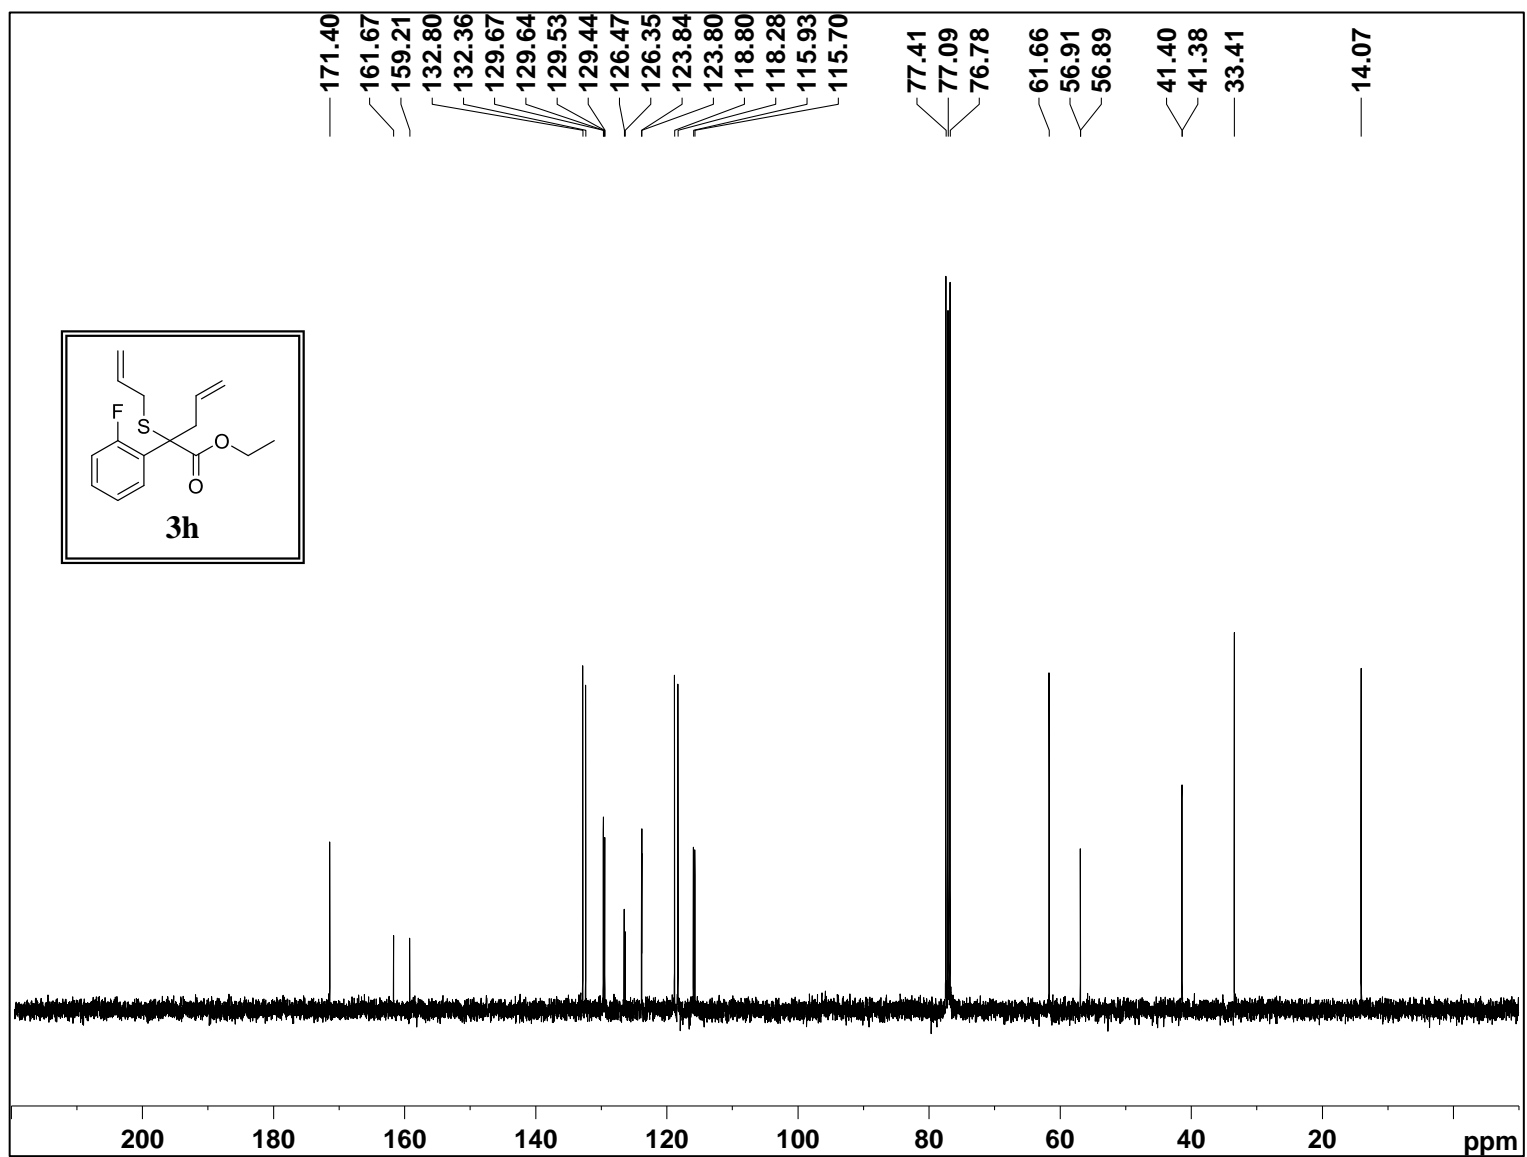

$^{13}\text{C}\{^1\text{H}\}$  DEPT-135 NMR for compound **3h** (101 MHz,  $\text{CDCl}_3$ )

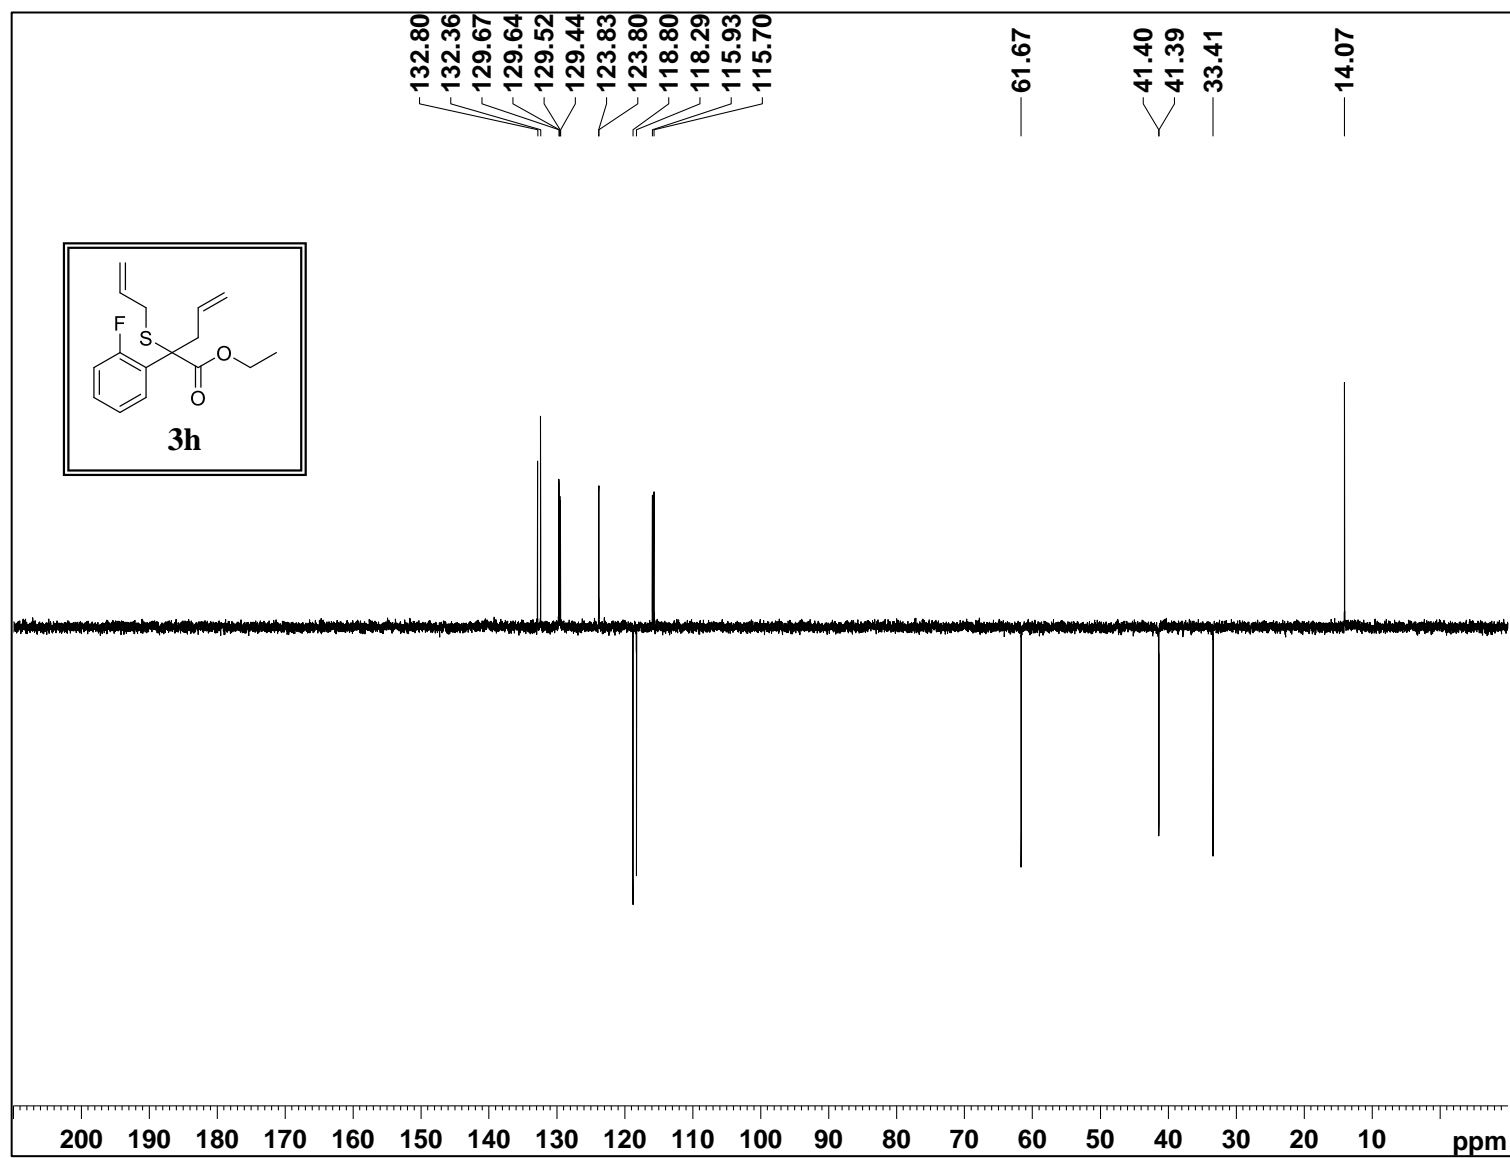

<sup>1</sup>H NMR for compound **3i** (400 MHz, CDCl<sub>3</sub>)

(data)

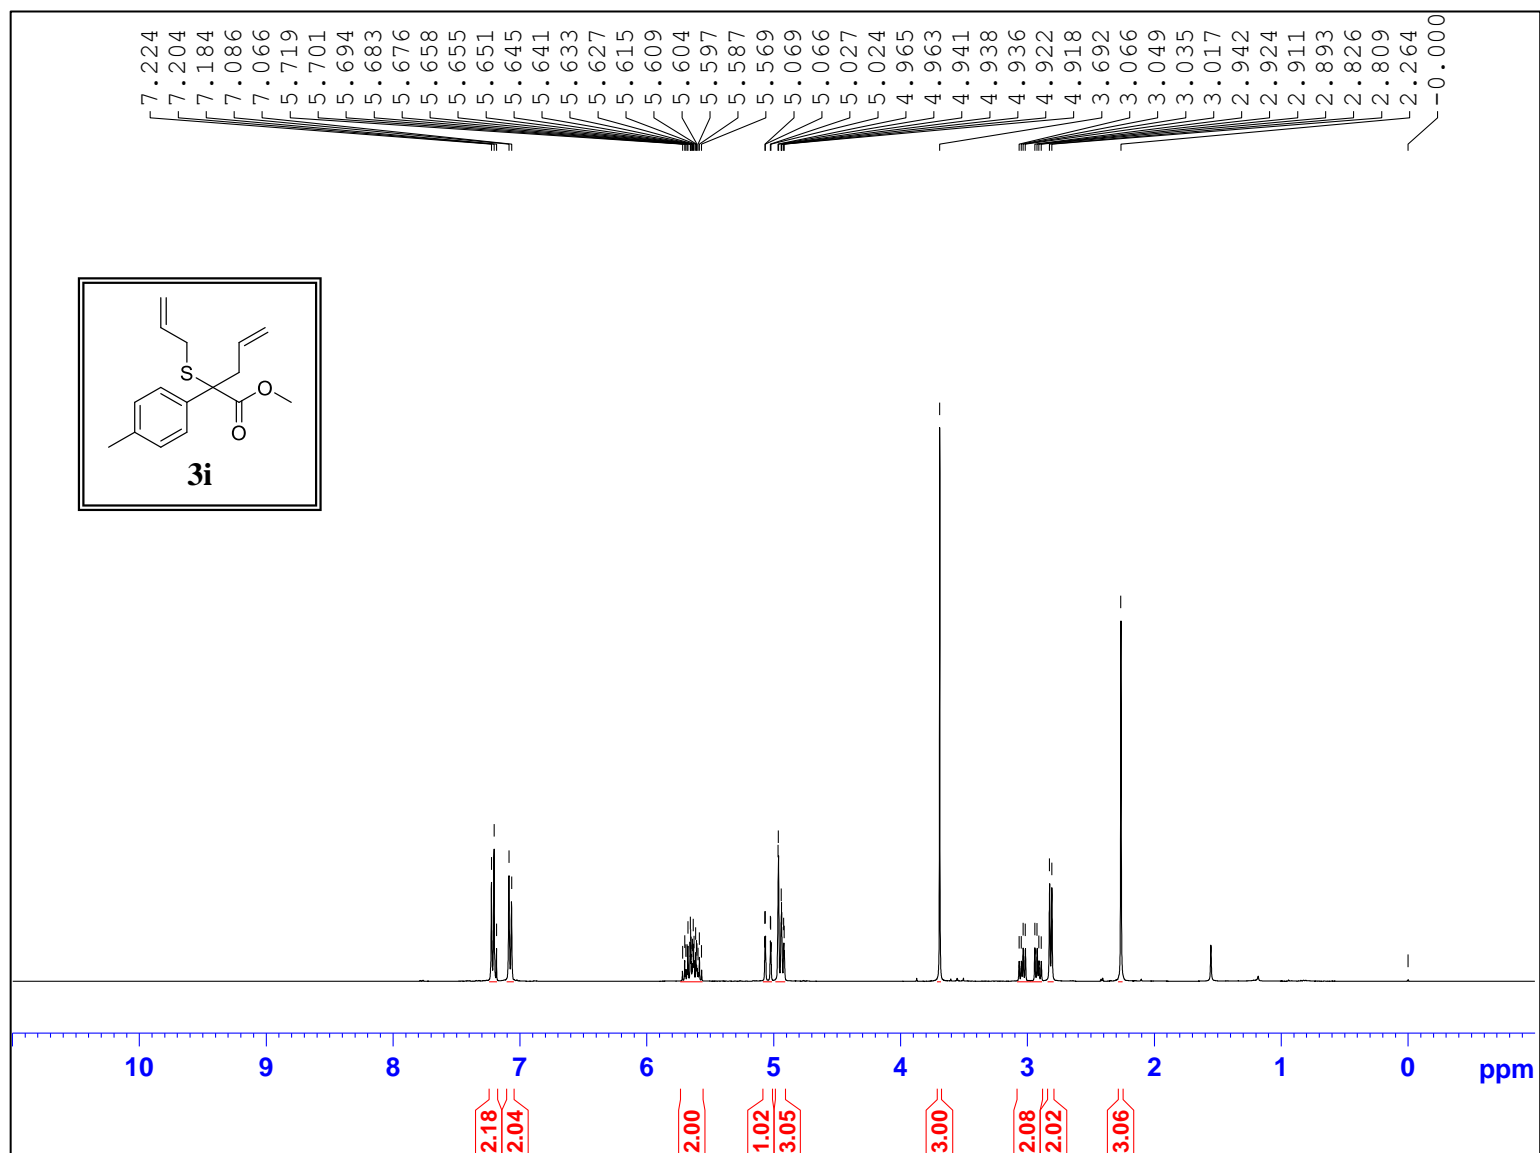

$^{13}\text{C}\{^1\text{H}\}$  NMR for compound **3i** (101 MHz,  $\text{CDCl}_3$ )

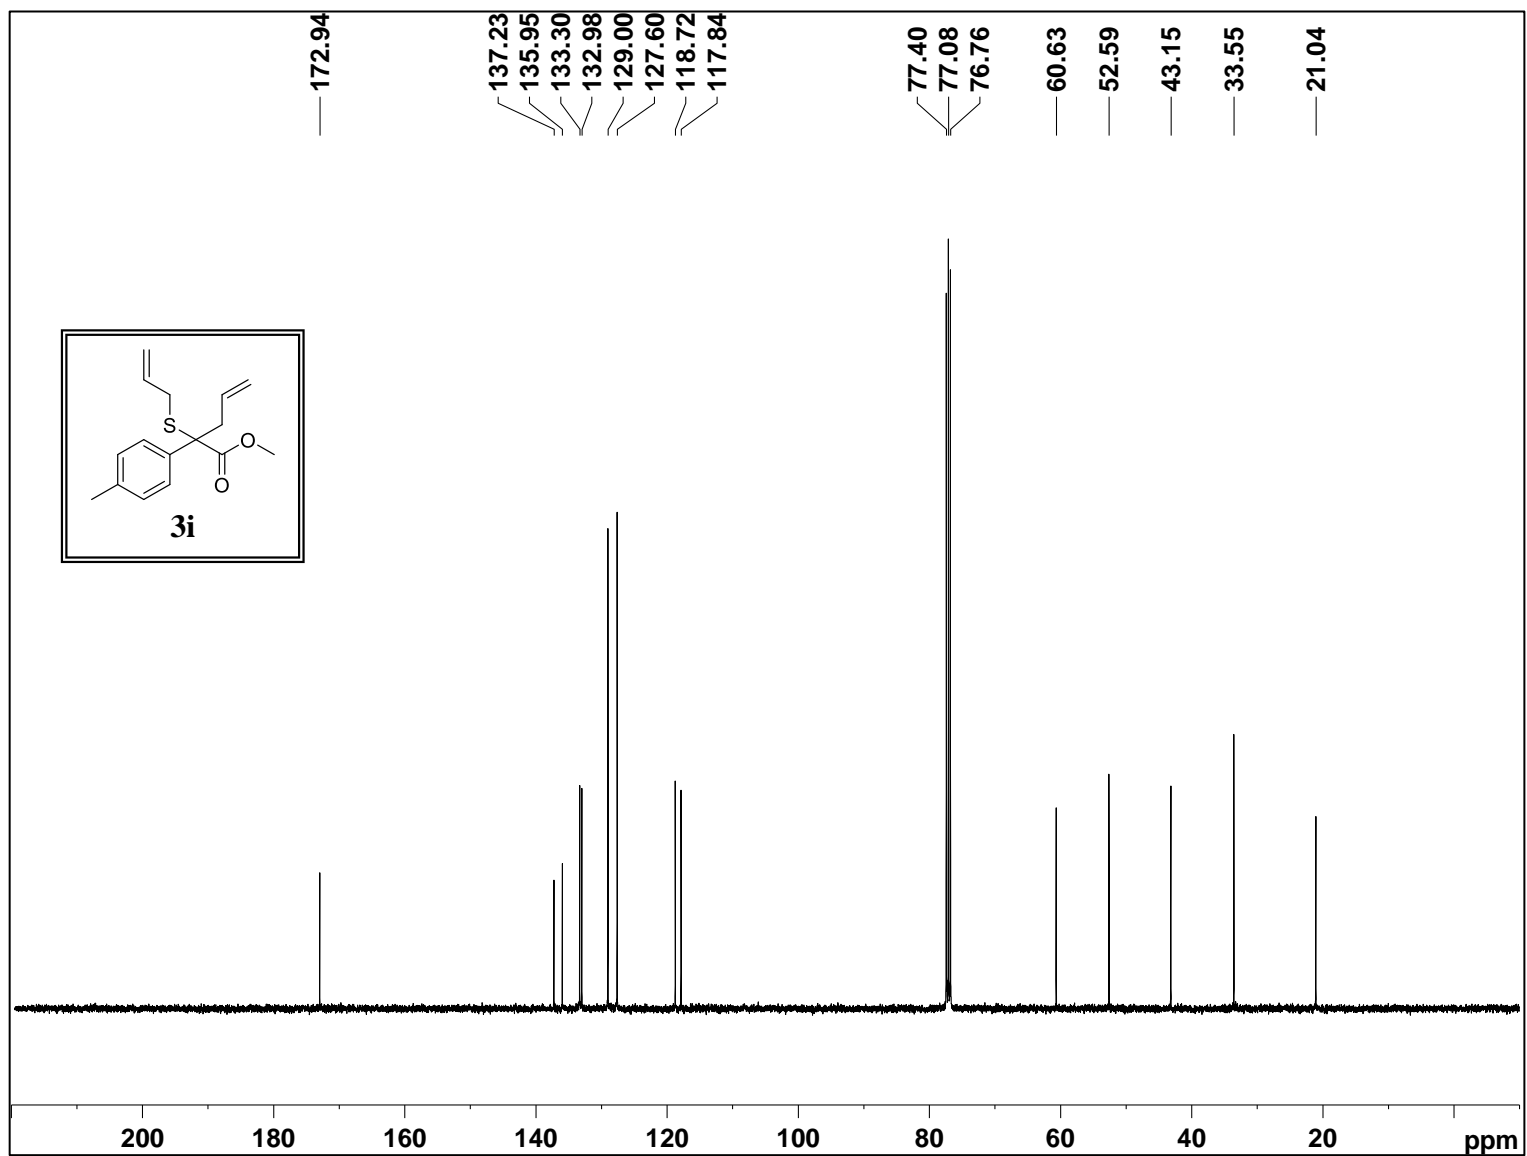

<sup>1</sup>H NMR for compound **3j** (400 MHz, CDCl<sub>3</sub>)

(data)

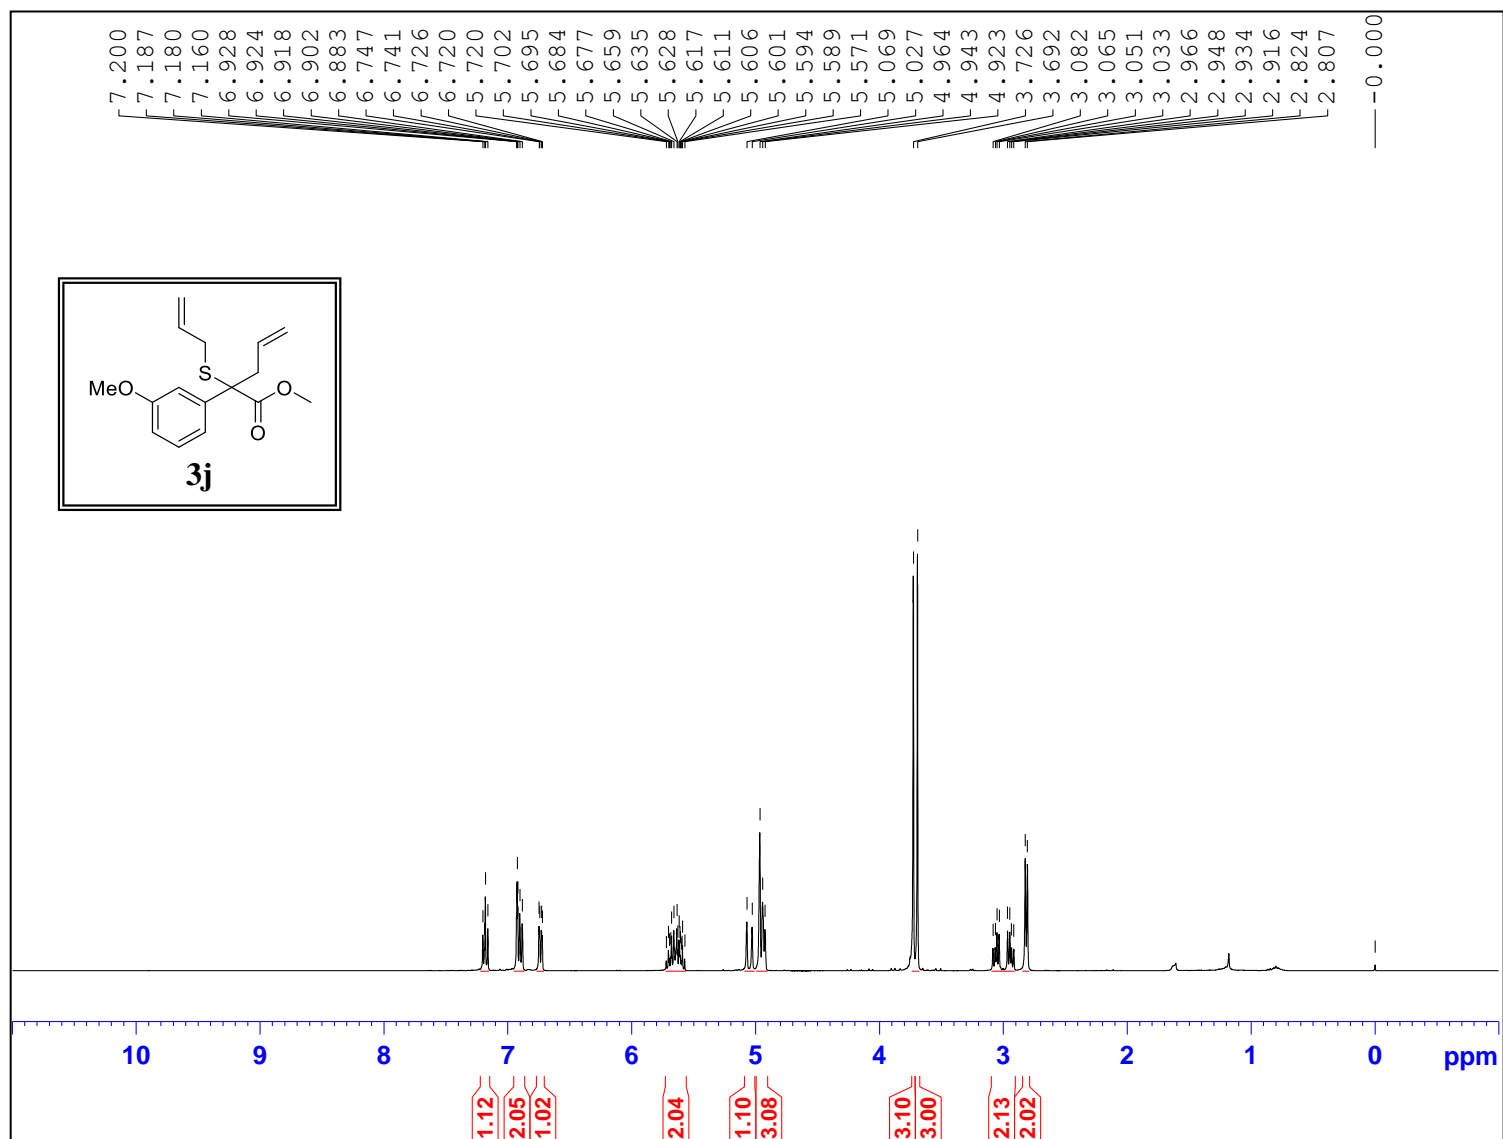

$^{13}\text{C}\{^1\text{H}\}$  NMR for compound **3j** (101 MHz,  $\text{CDCl}_3$ )

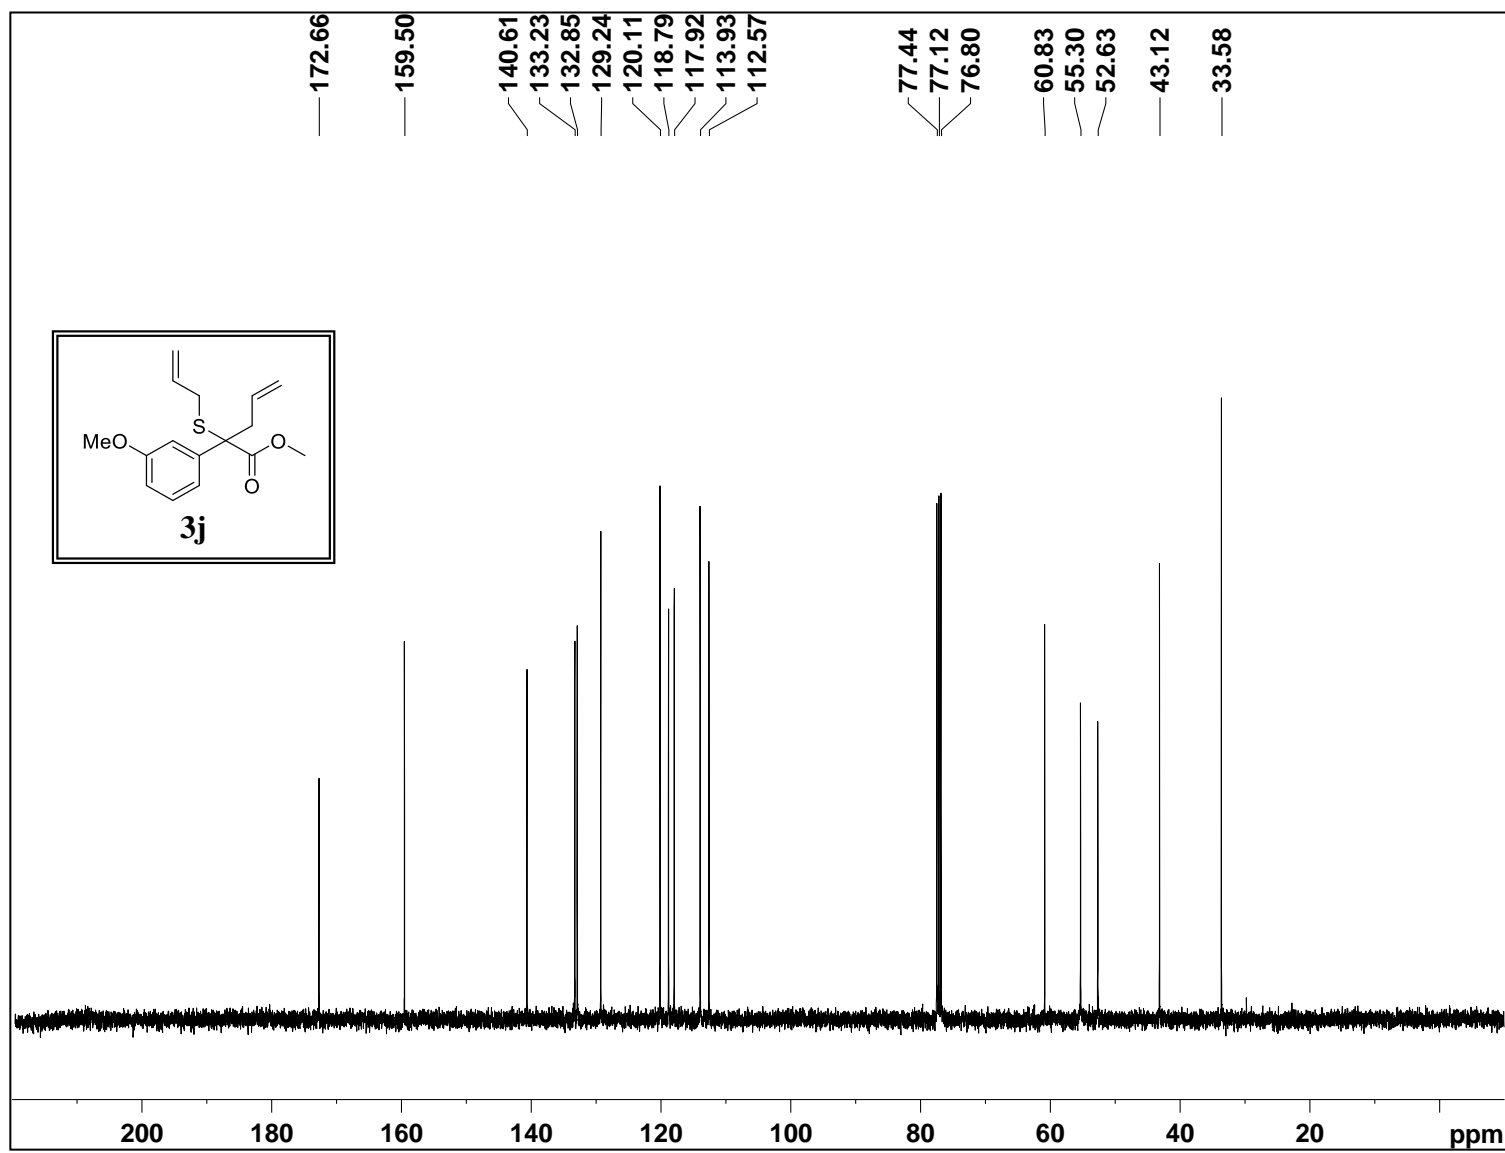

<sup>1</sup>H NMR for compound **3k** (400 MHz, CDCl<sub>3</sub>)

(data)

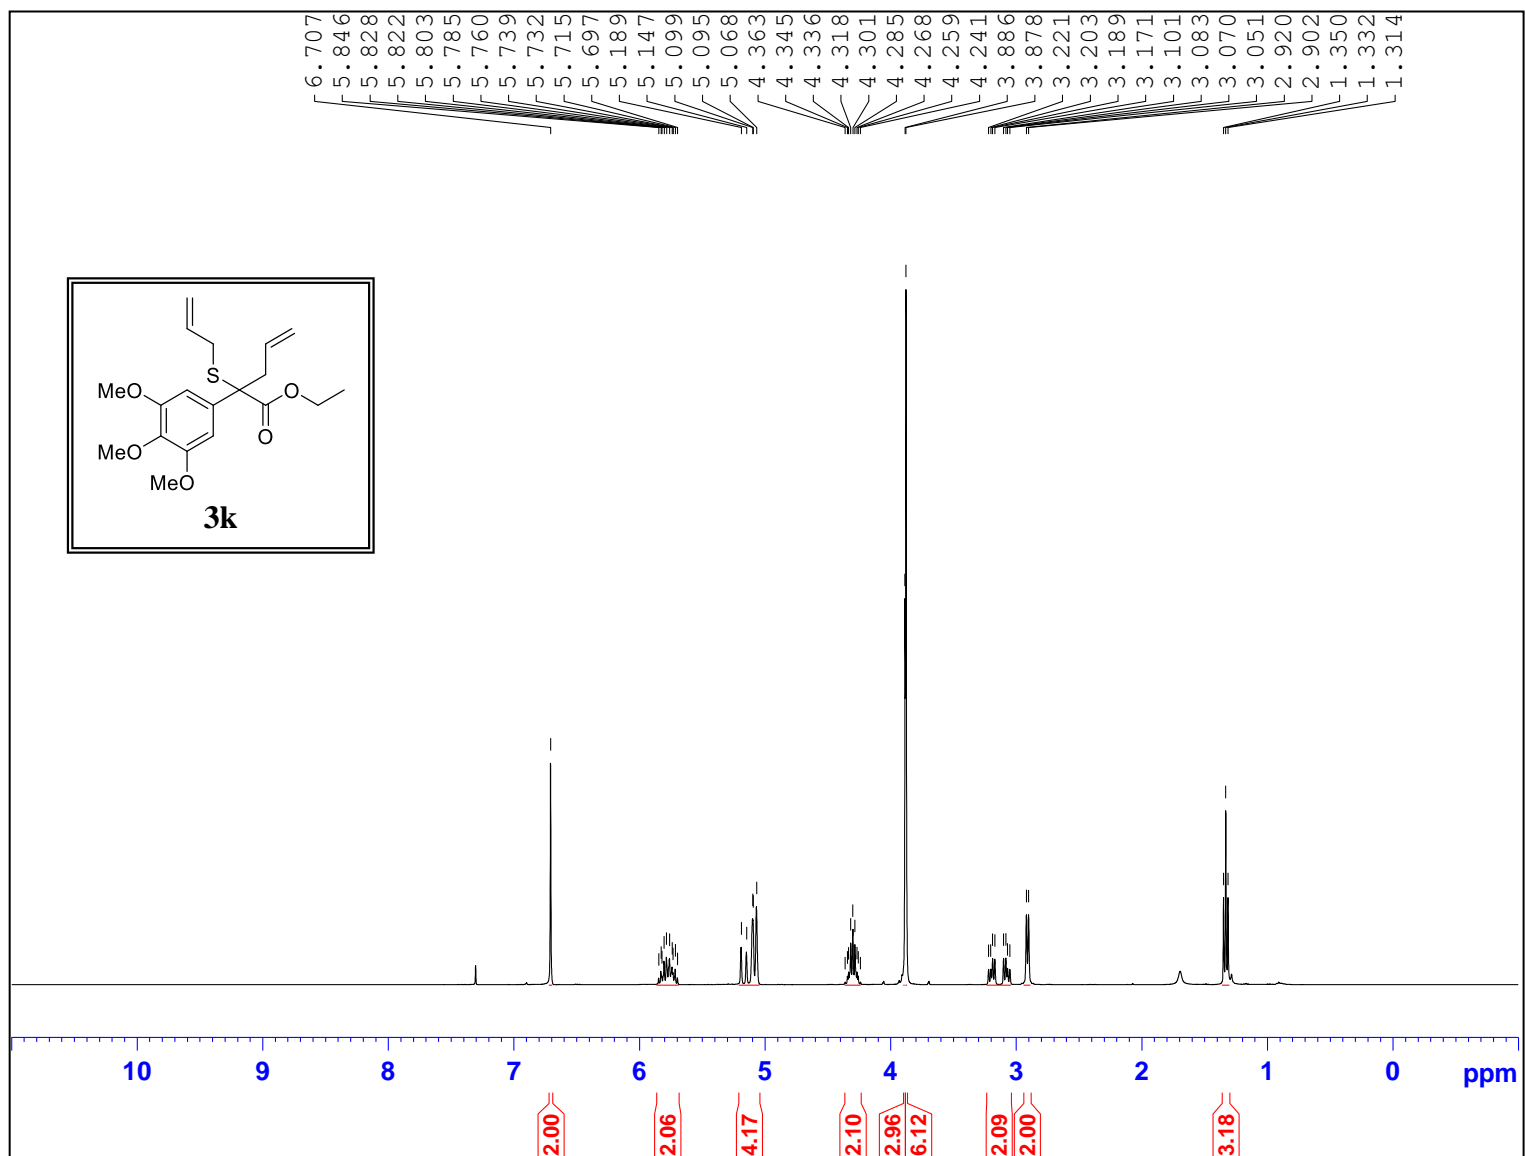



$^{13}\text{C}\{^1\text{H}\}$  NMR for compound **3k** (101 MHz,  $\text{CDCl}_3$ )

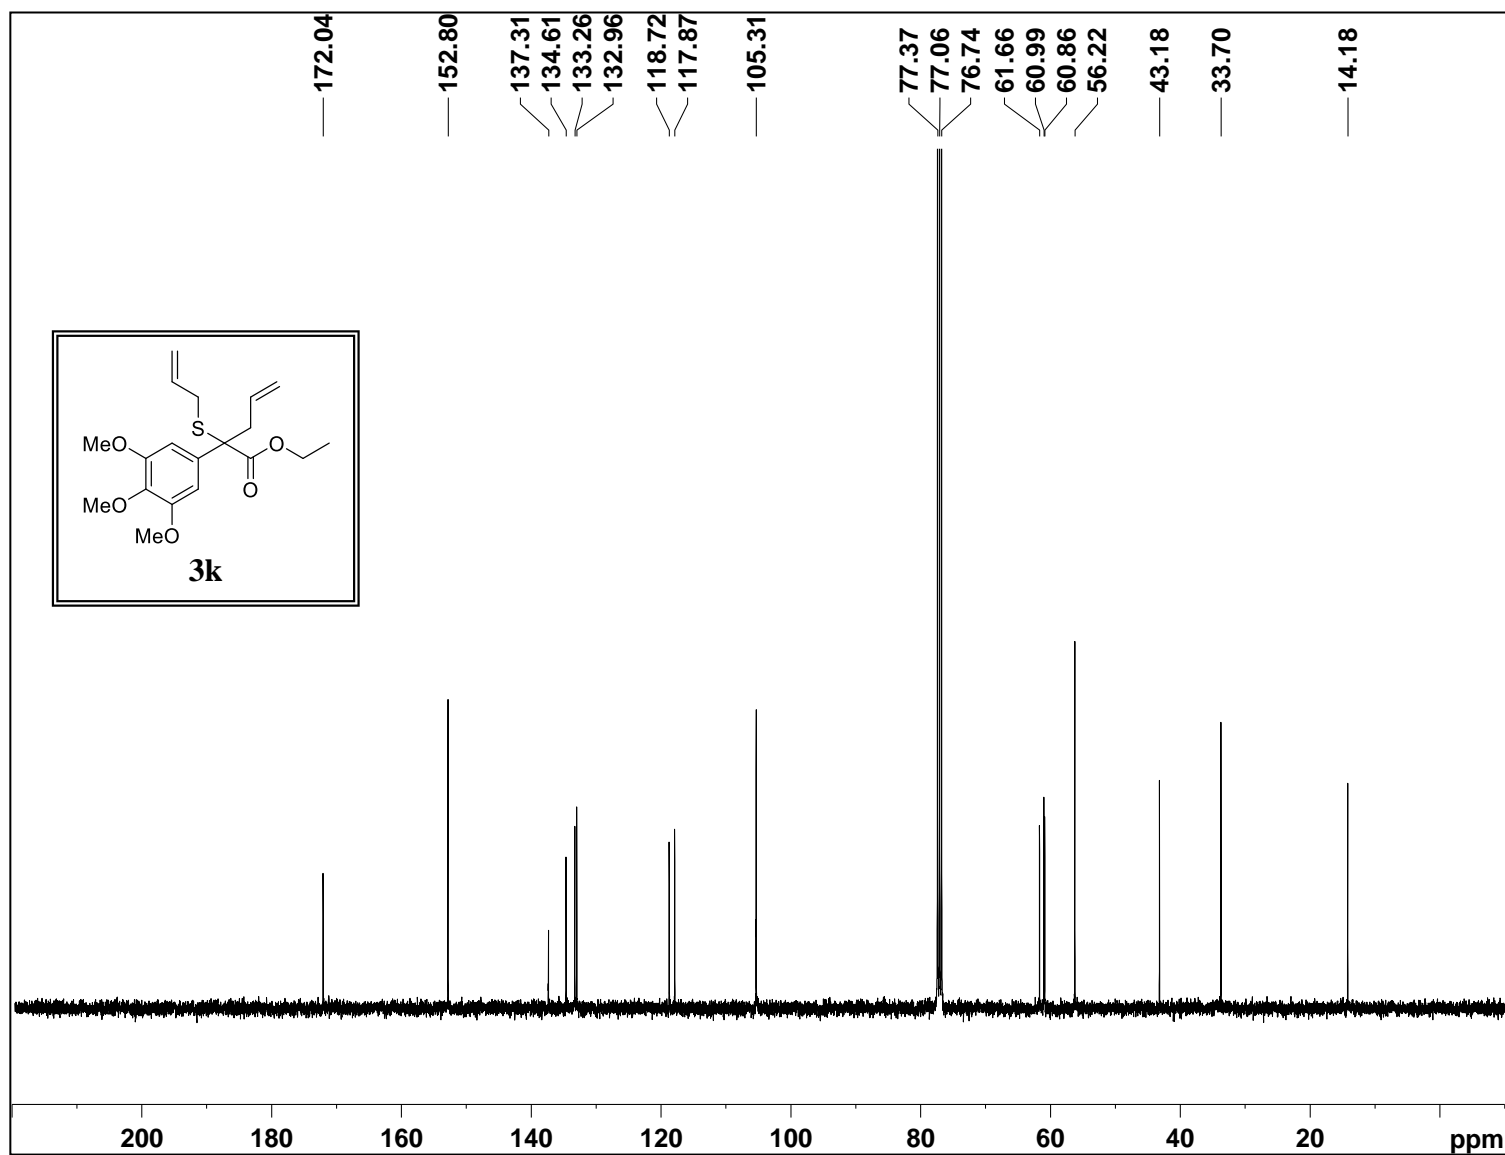

$^{13}\text{C}\{^1\text{H}\}$  DEPT-135 NMR for compound **3k** (101 MHz,  $\text{CDCl}_3$ )

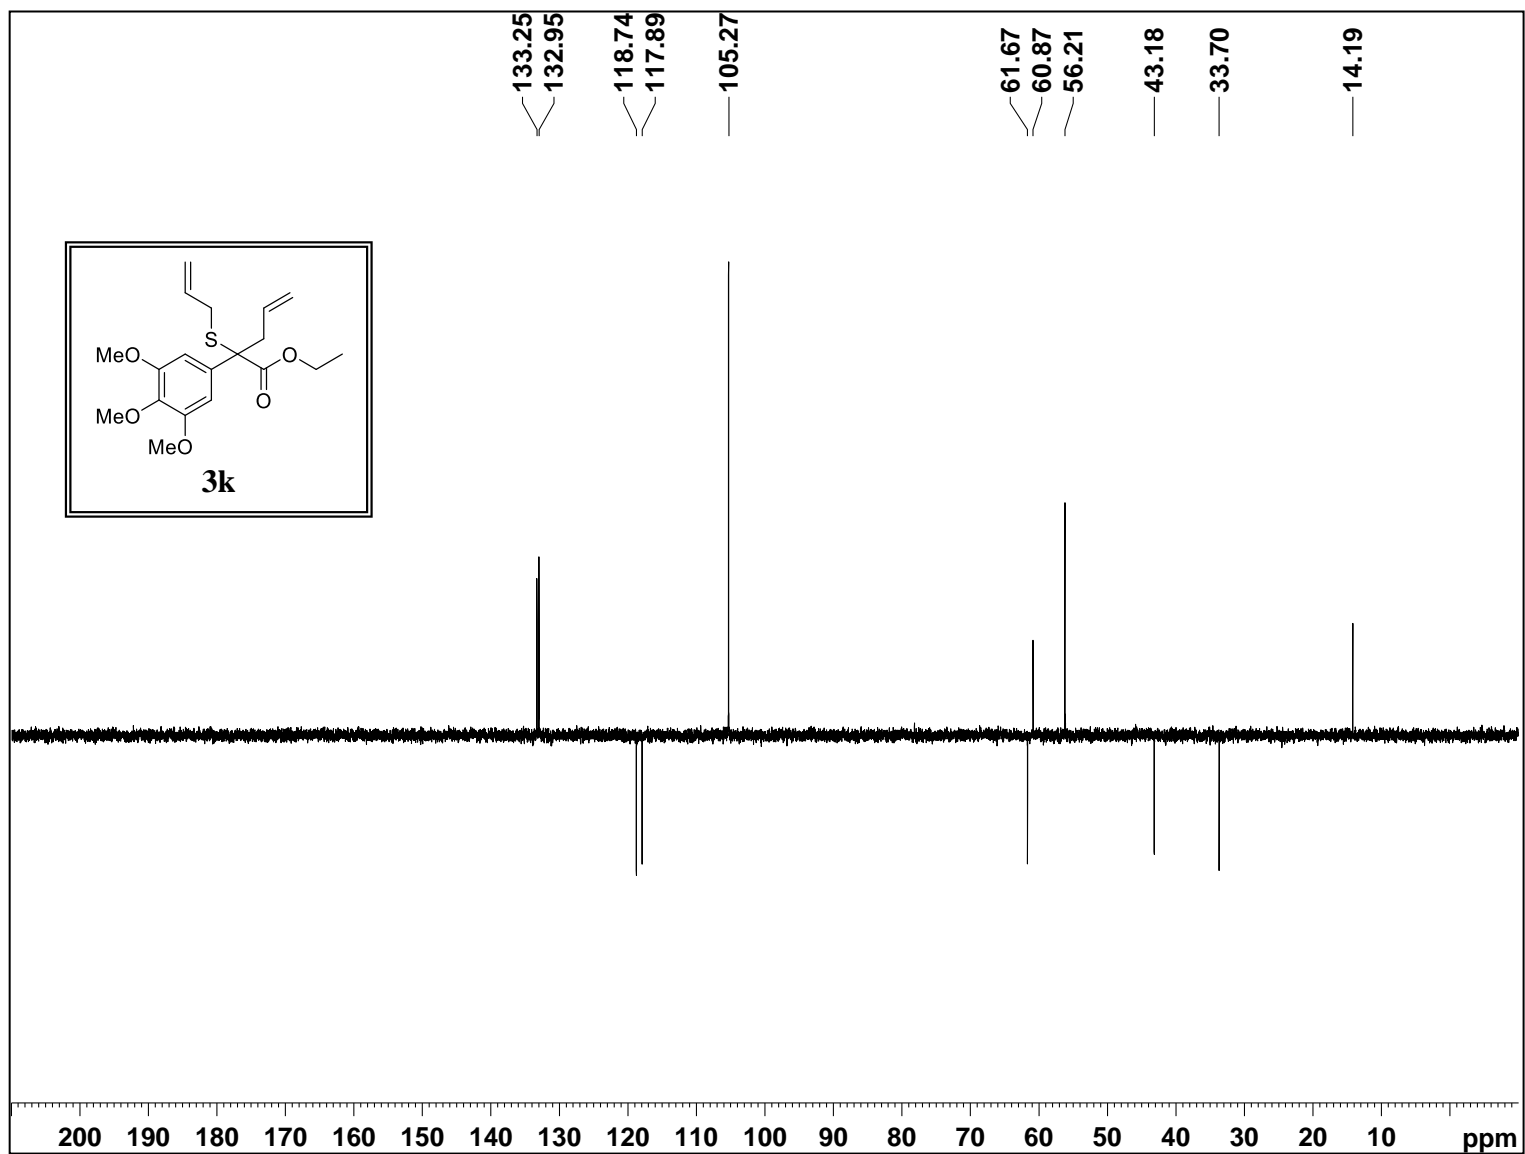

<sup>1</sup>H NMR for compound **3I** (400 MHz, CDCl<sub>3</sub>)

(data)

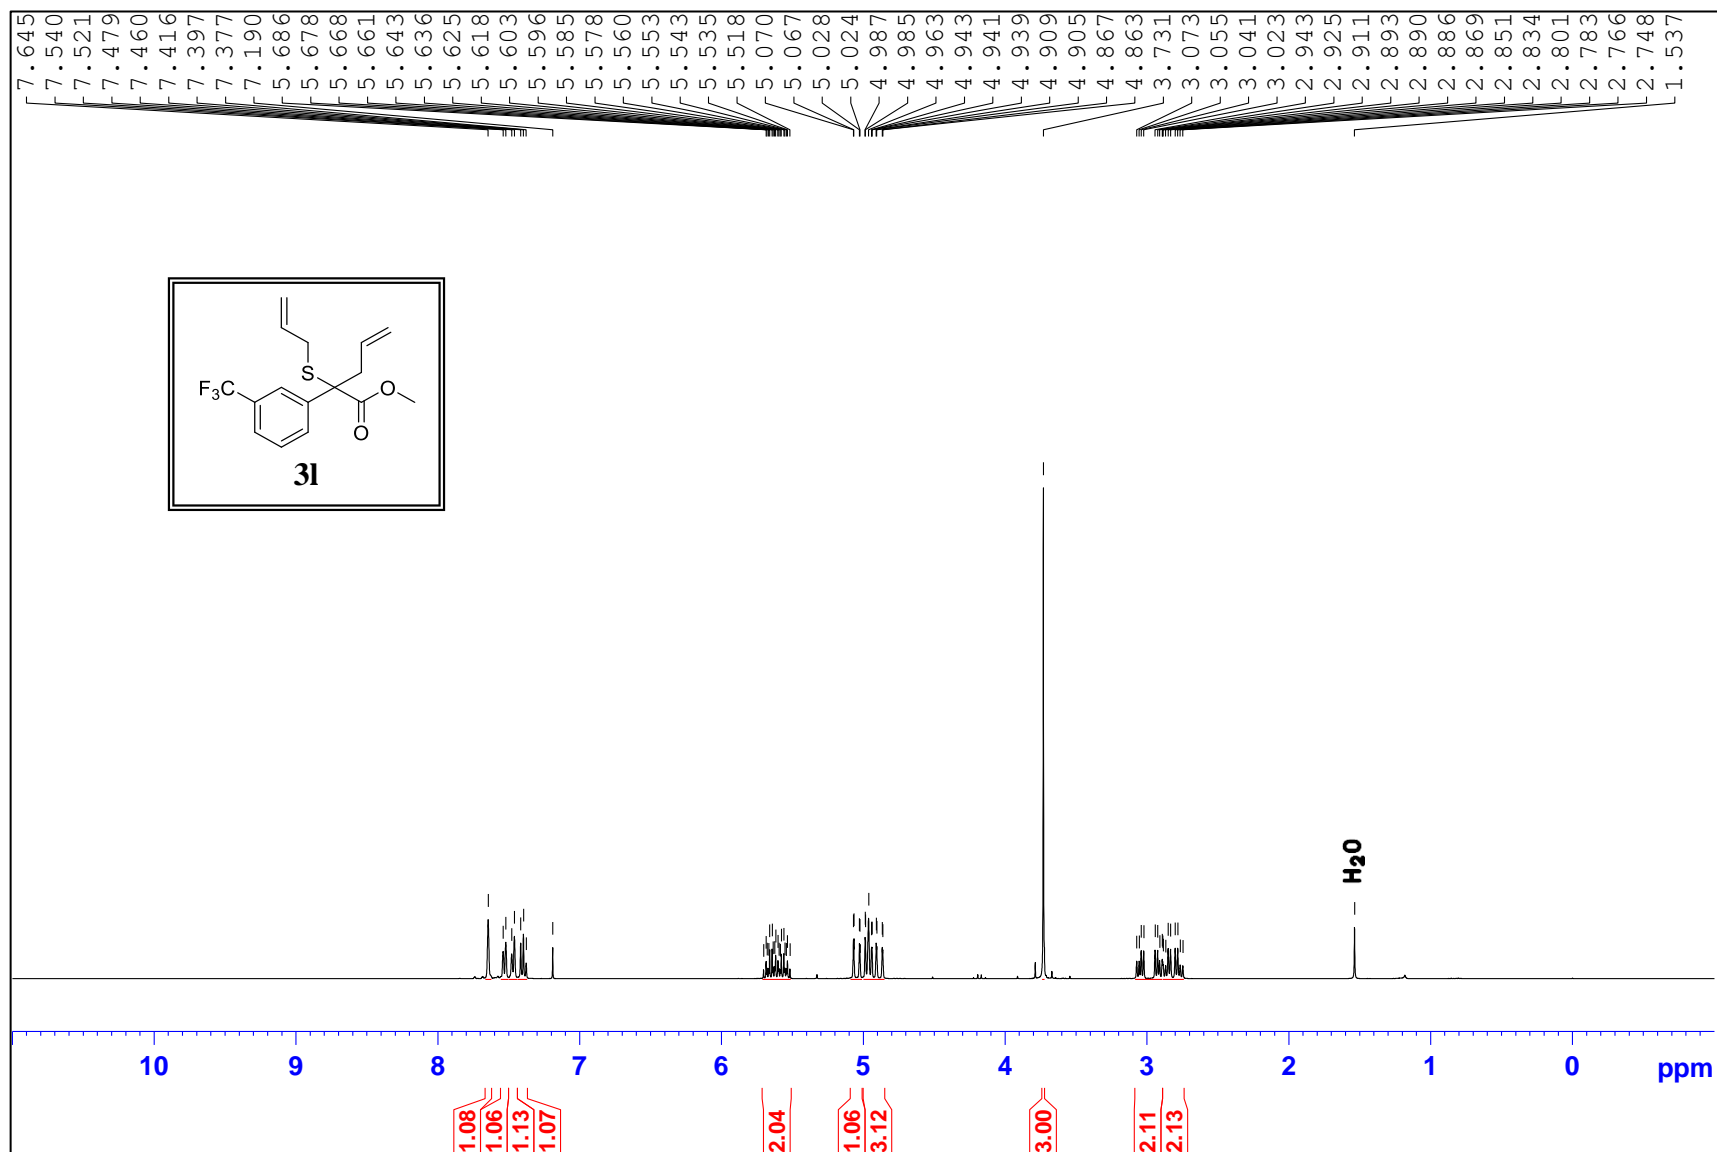

$^{13}\text{C}\{^1\text{H}\}$  NMR for compound **31** (101 MHz,  $\text{CDCl}_3$ )

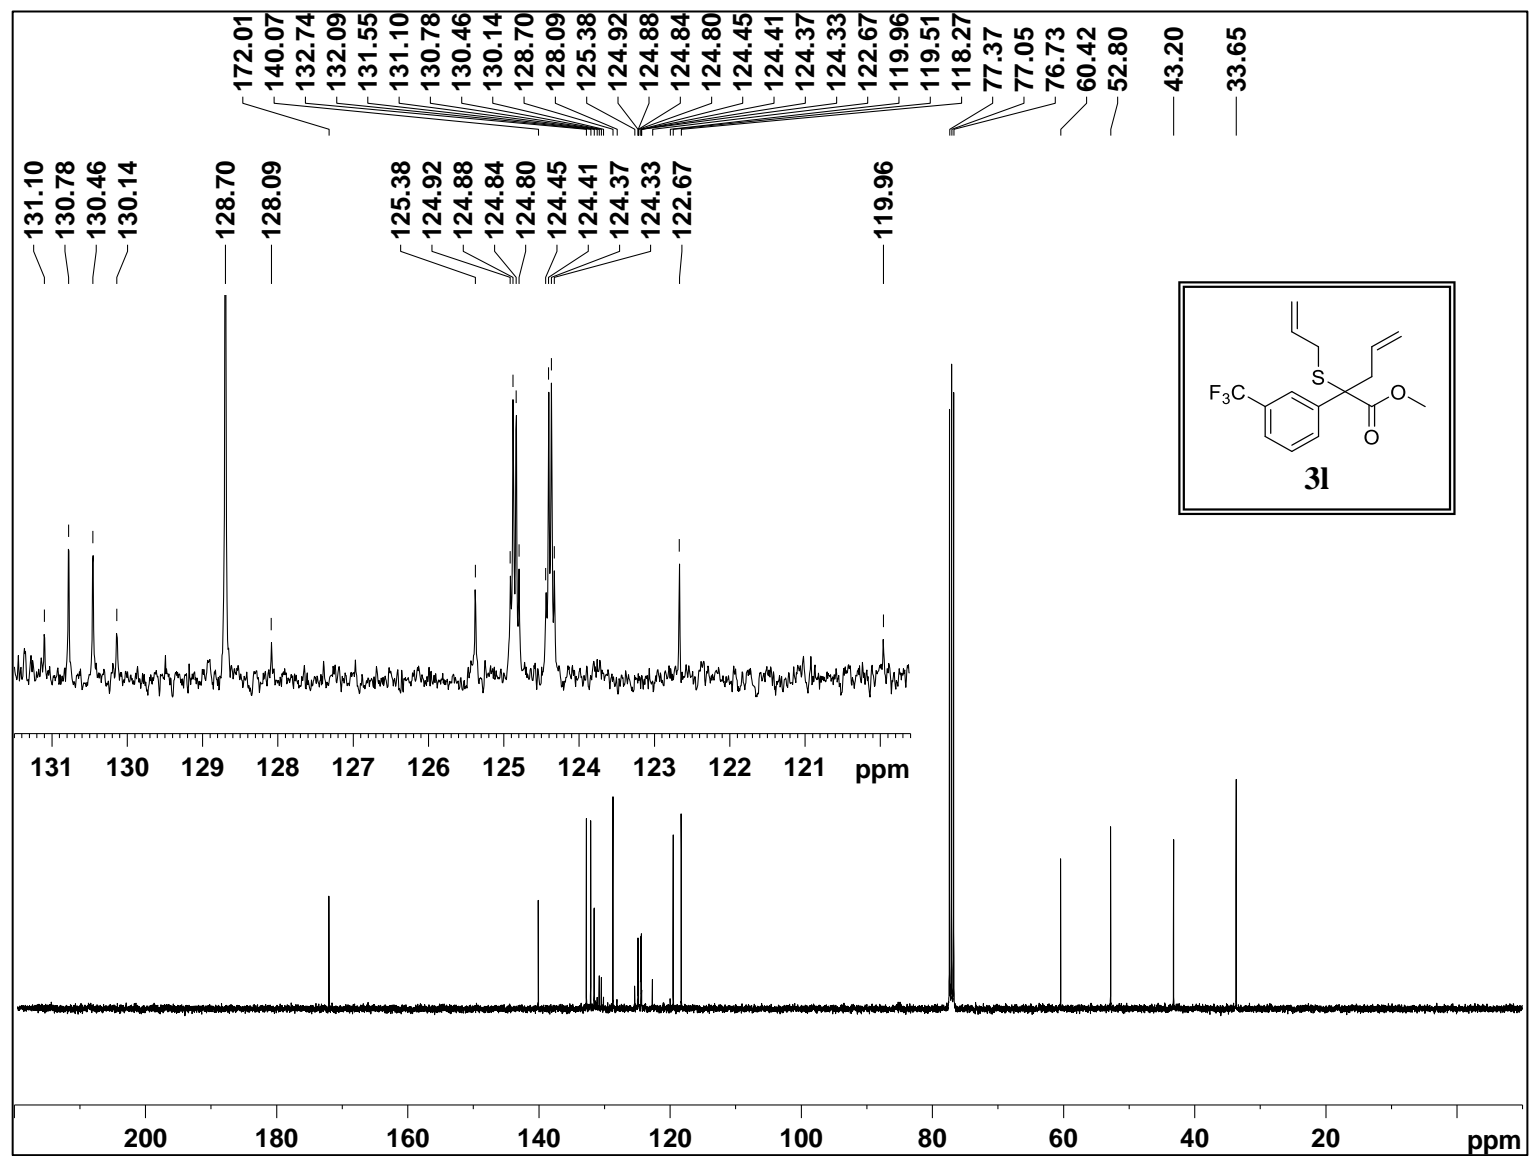

[<sup>1</sup>H, <sup>1</sup>H] COSY for compound **31** (400 MHz, CDCl<sub>3</sub>)

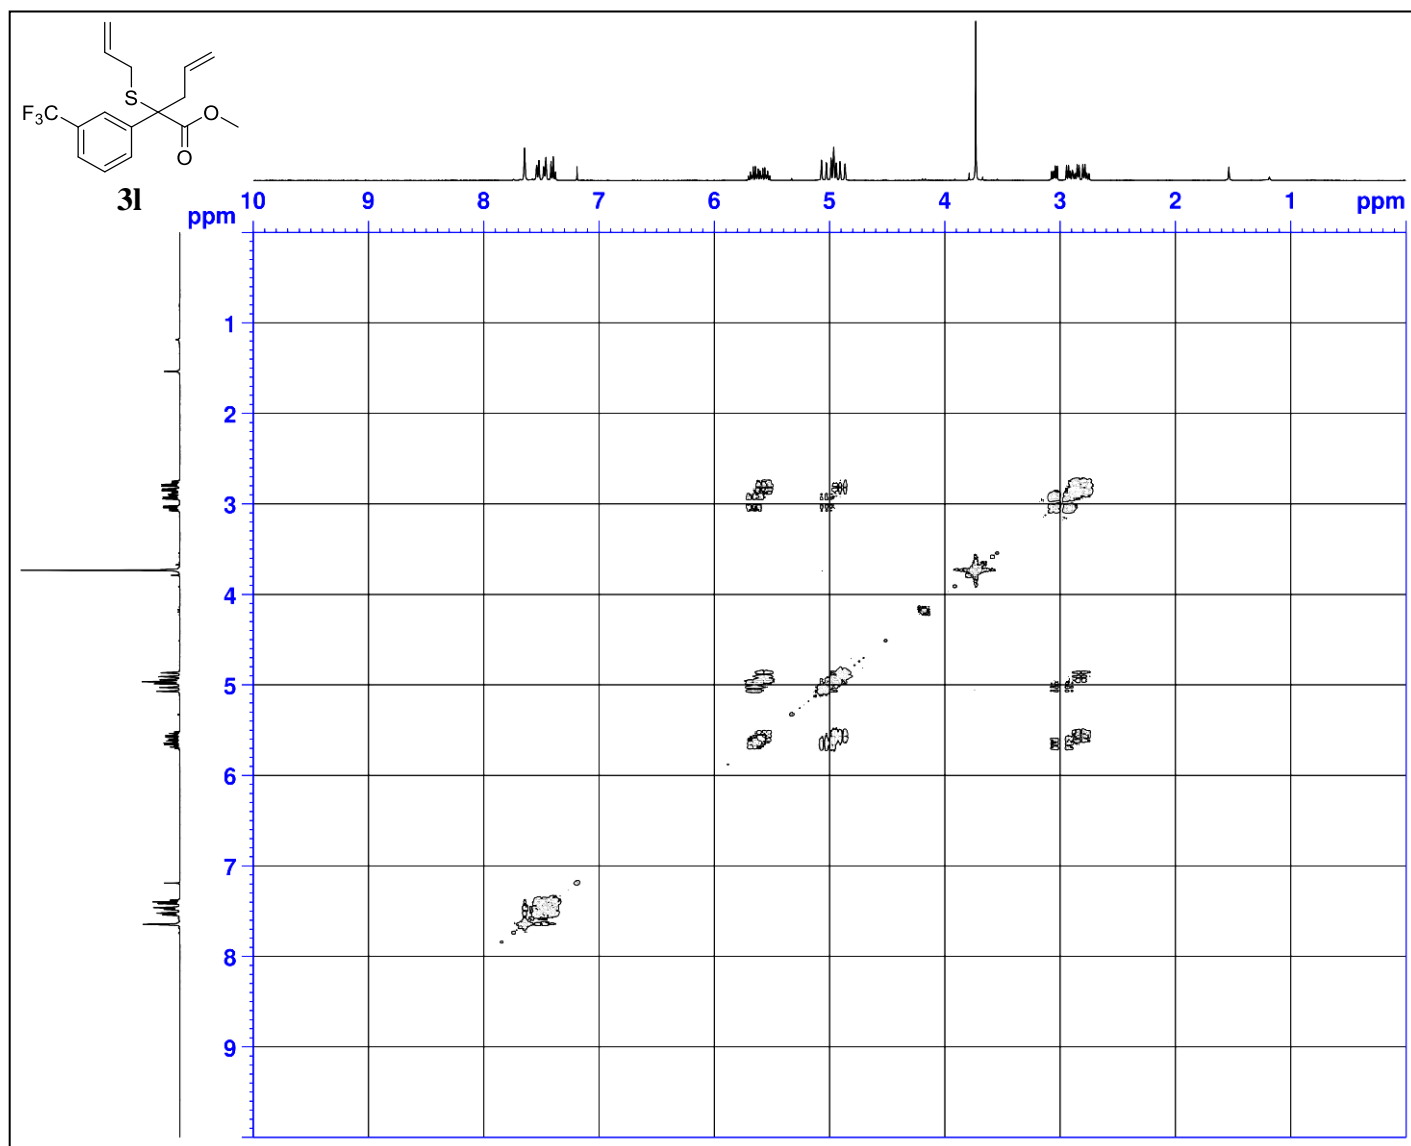

[ $^1\text{H}$ ,  $^{13}\text{C}\{^1\text{H}\}$ ] HSQC for compound **31** (400 MHz,  $\text{CDCl}_3$ )

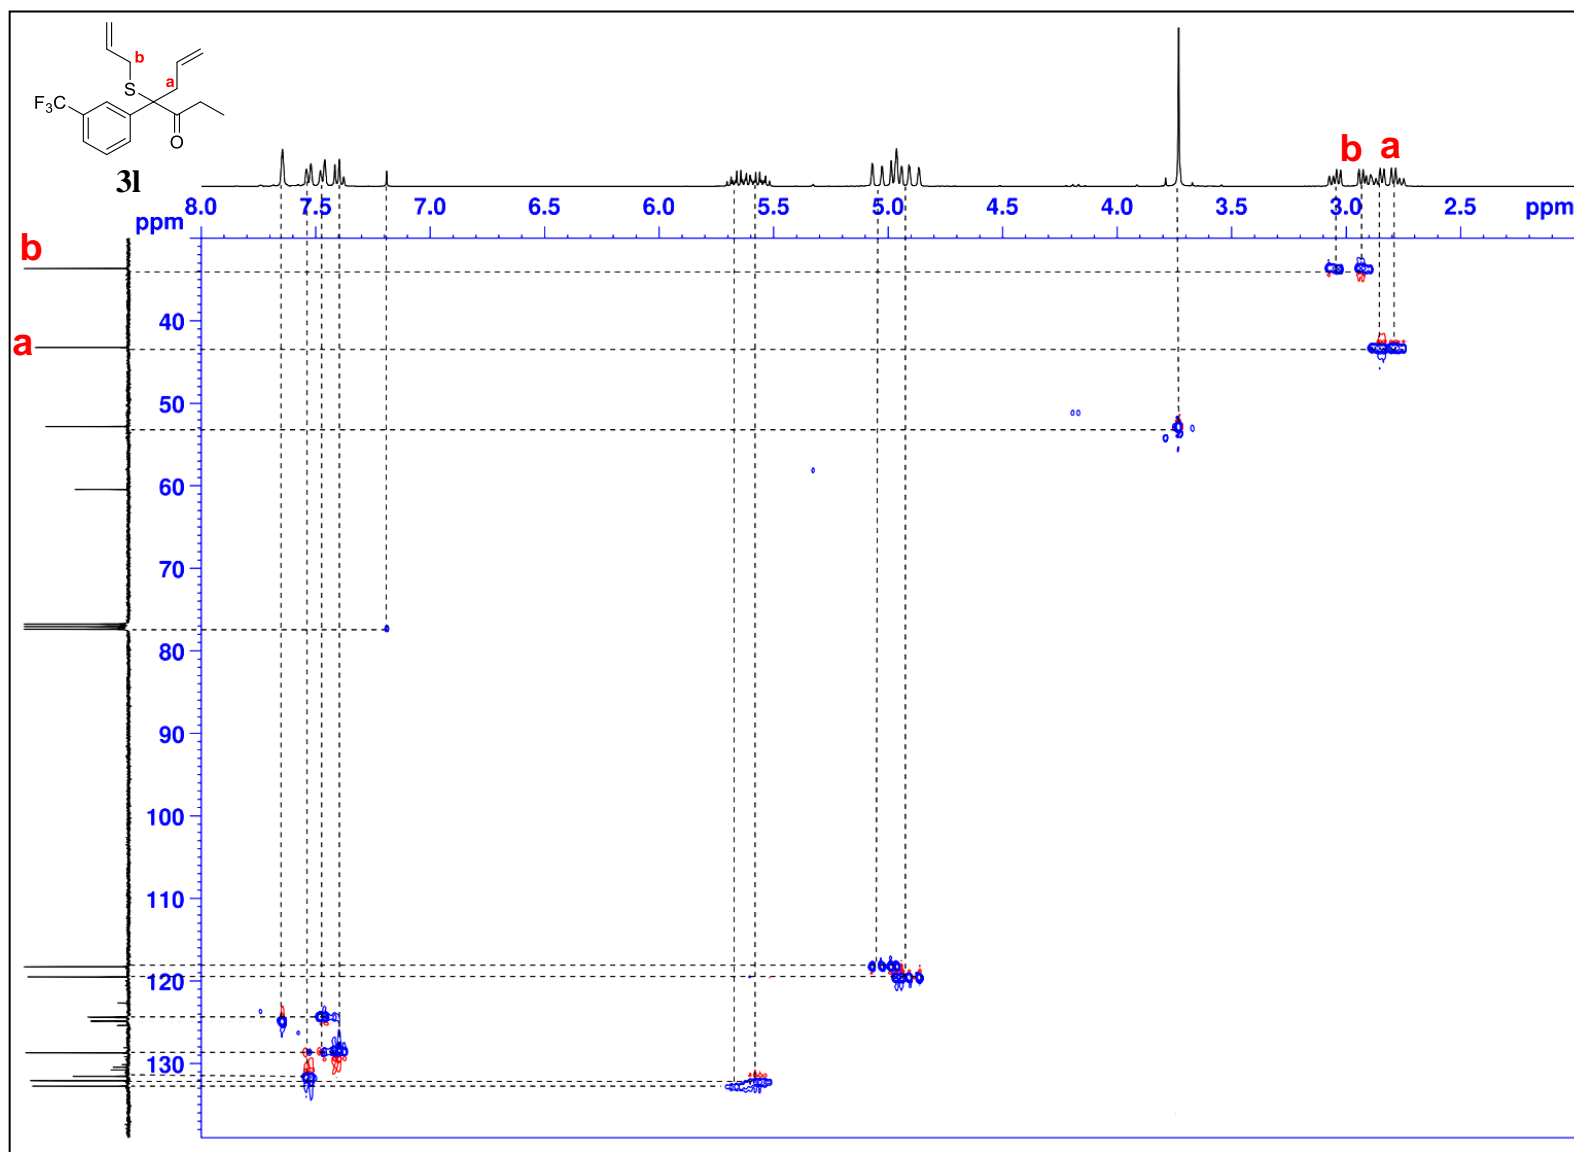

$^{13}\text{C}\{^1\text{H}\}$  DEPT-135 NMR for compound **3I** (101 MHz,  $\text{CDCl}_3$ )

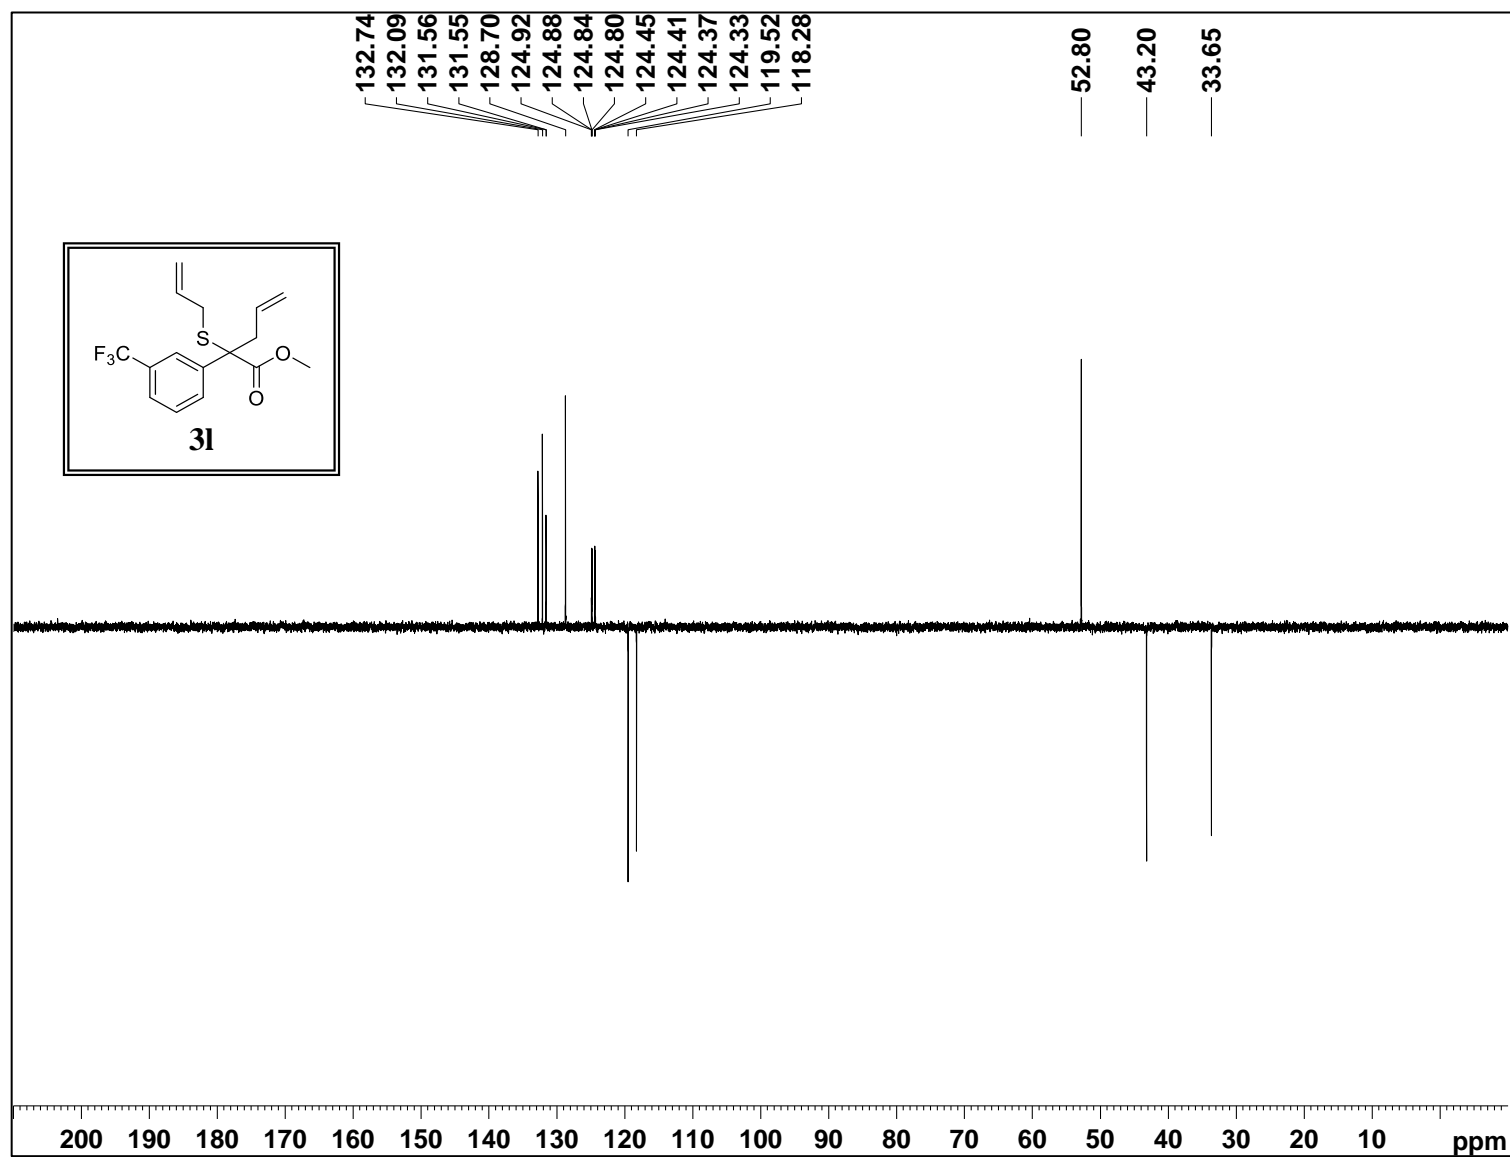

<sup>1</sup>H NMR for compound **3m** (400 MHz, CDCl<sub>3</sub>)

(data)

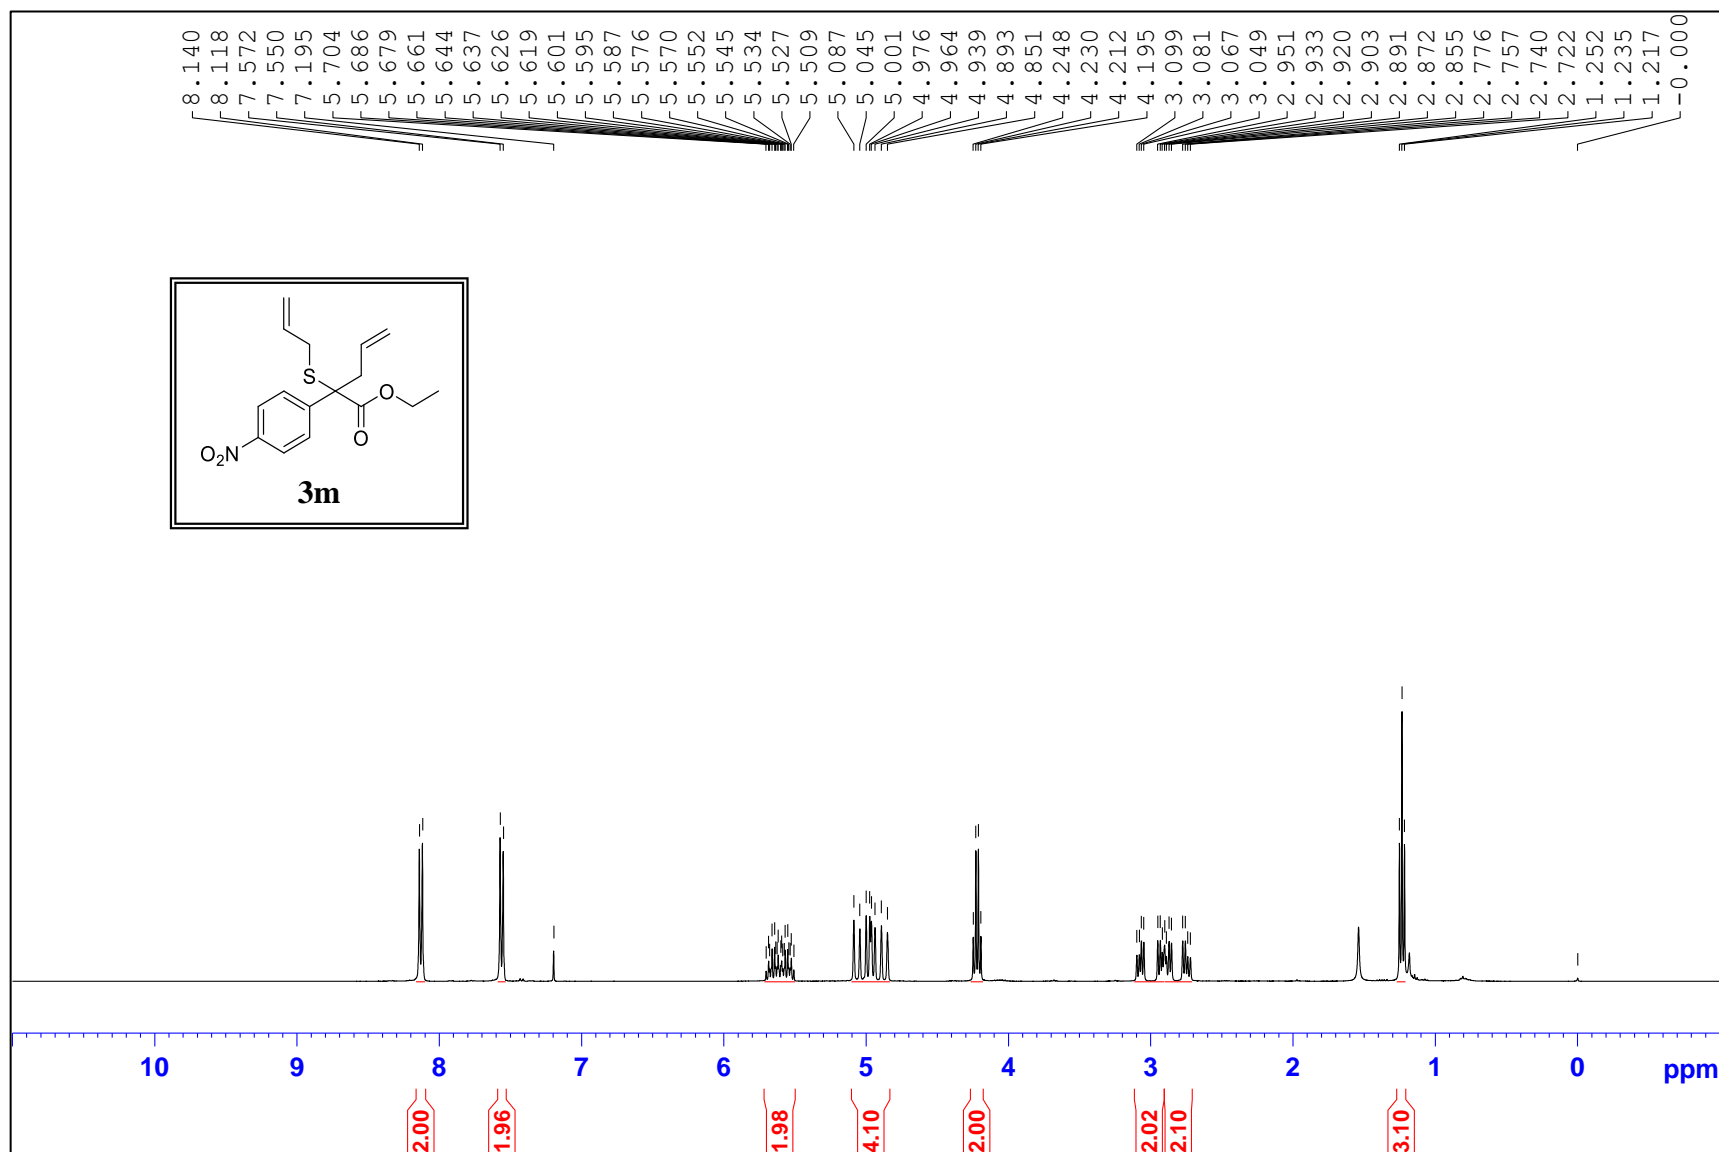



$^{13}\text{C}\{^1\text{H}\}$  NMR for compound **3m** (101 MHz,  $\text{CDCl}_3$ )

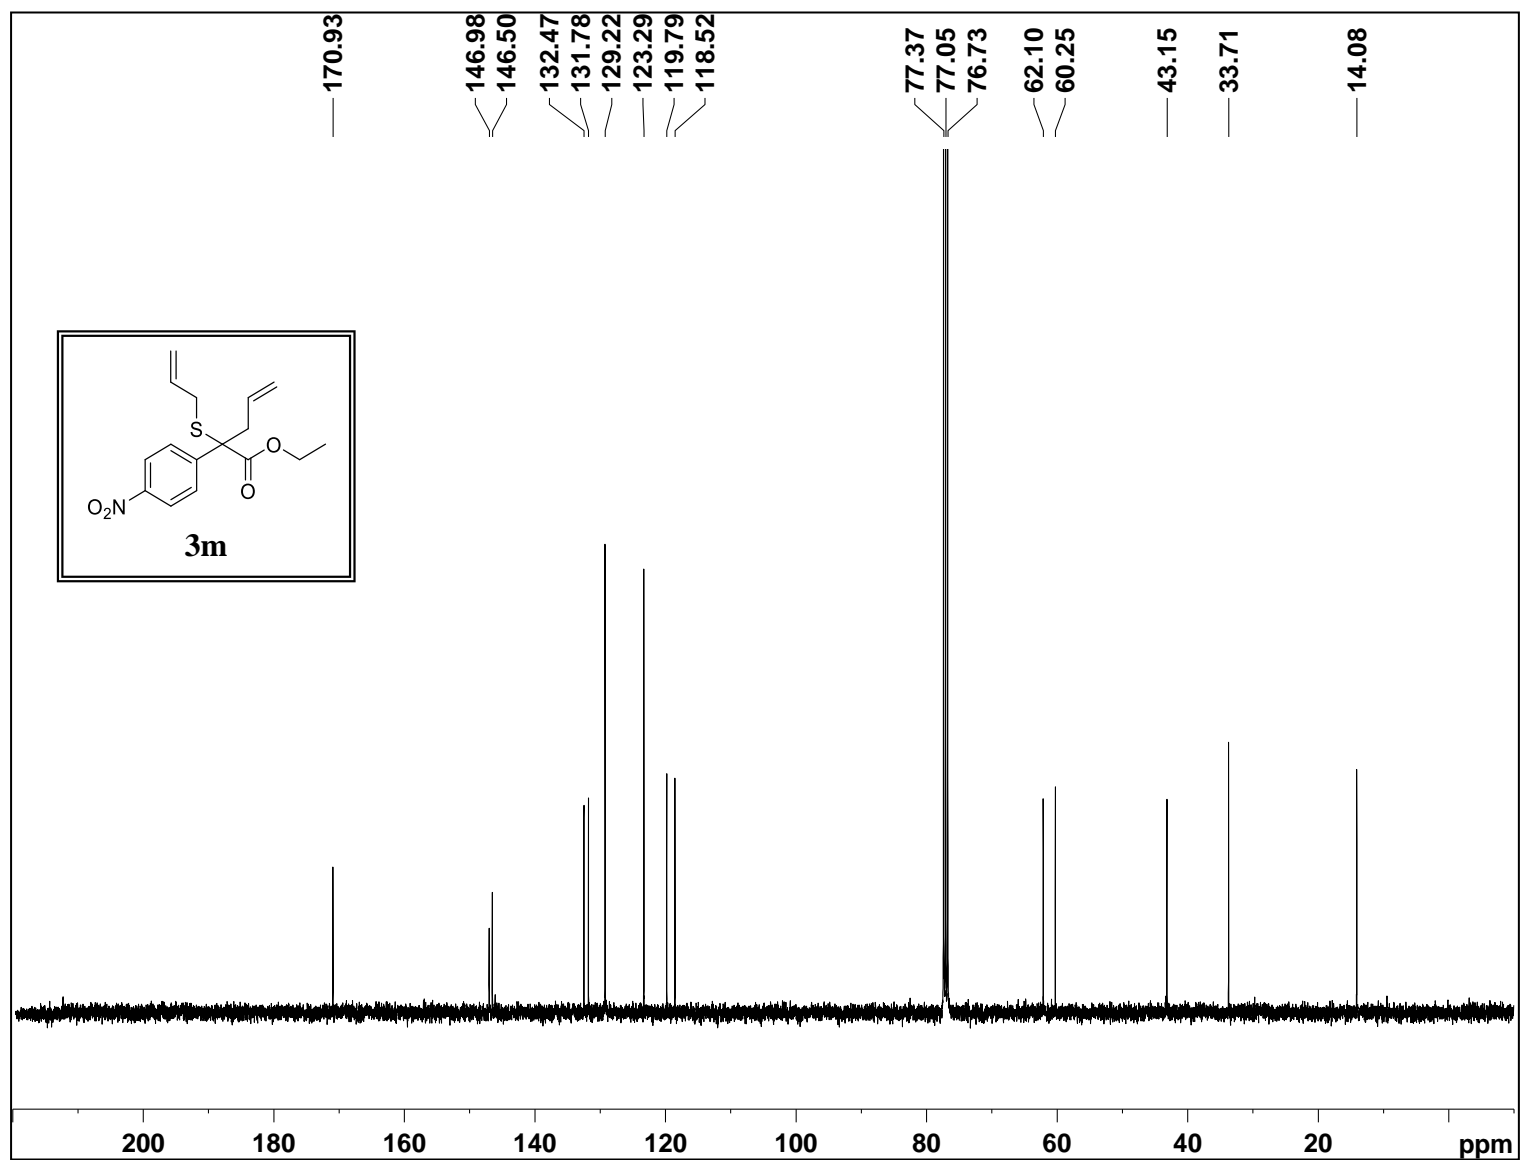

<sup>1</sup>H NMR for compound **3n** (400 MHz, CDCl<sub>3</sub>) (data)

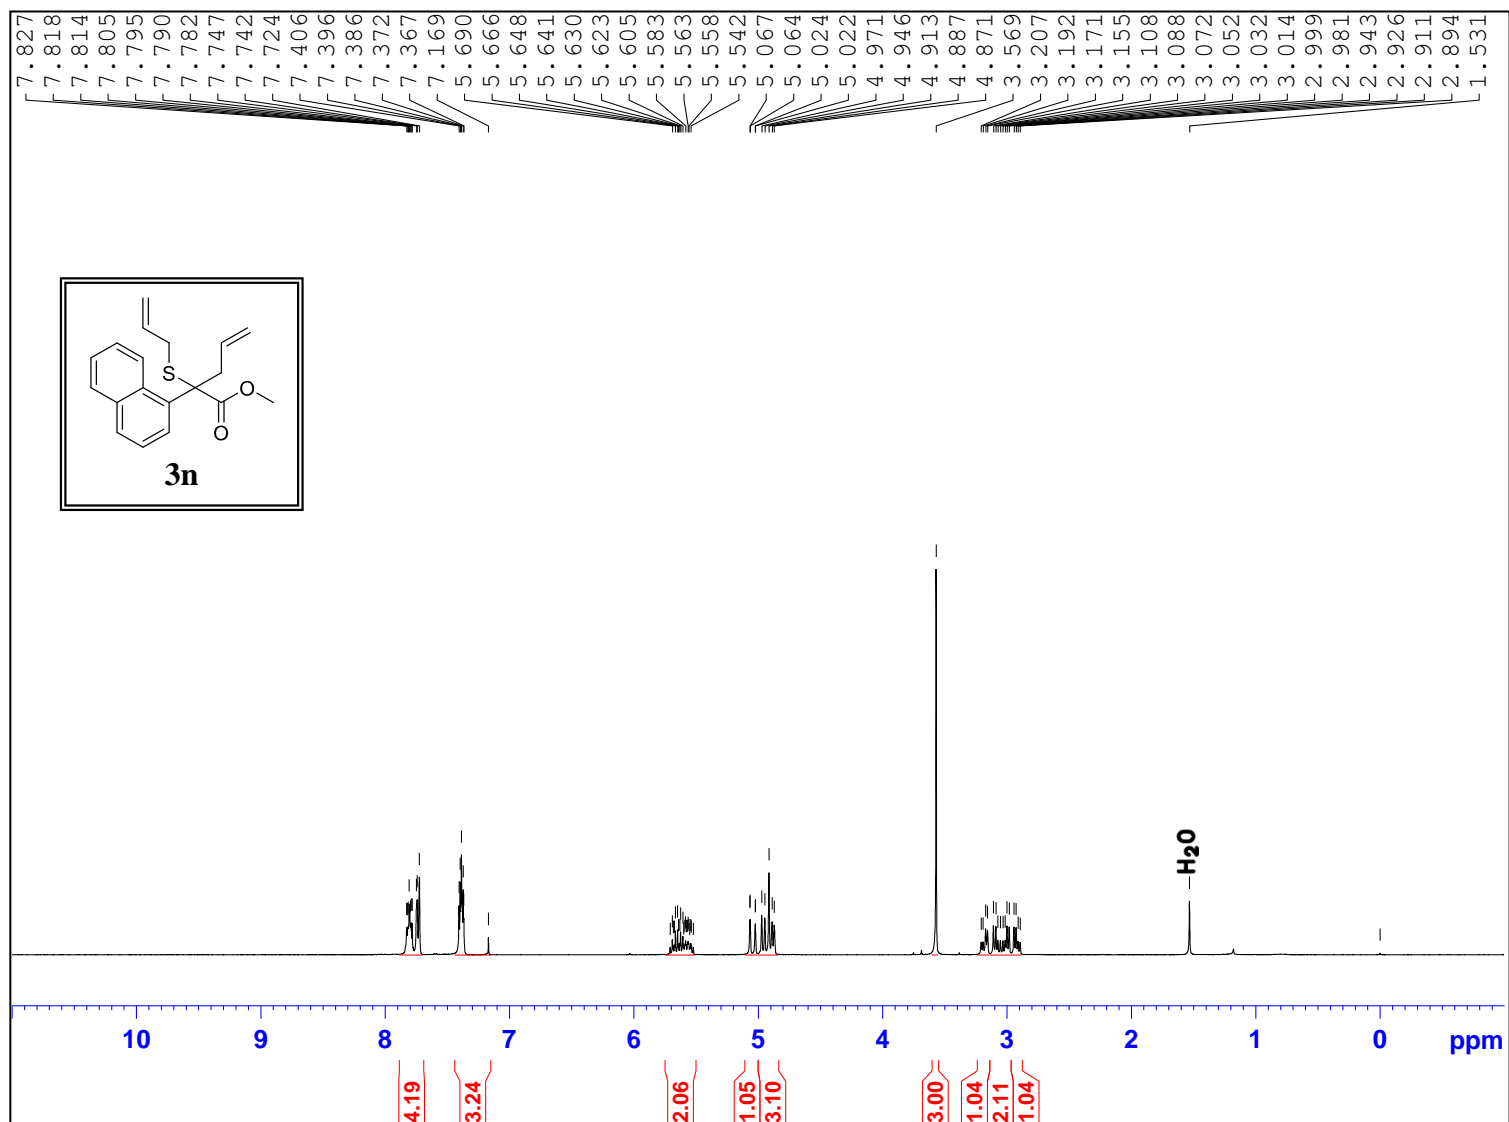

$^{13}\text{C}\{^1\text{H}\}$  NMR for compound **3n** (101 MHz,  $\text{CDCl}_3$ )

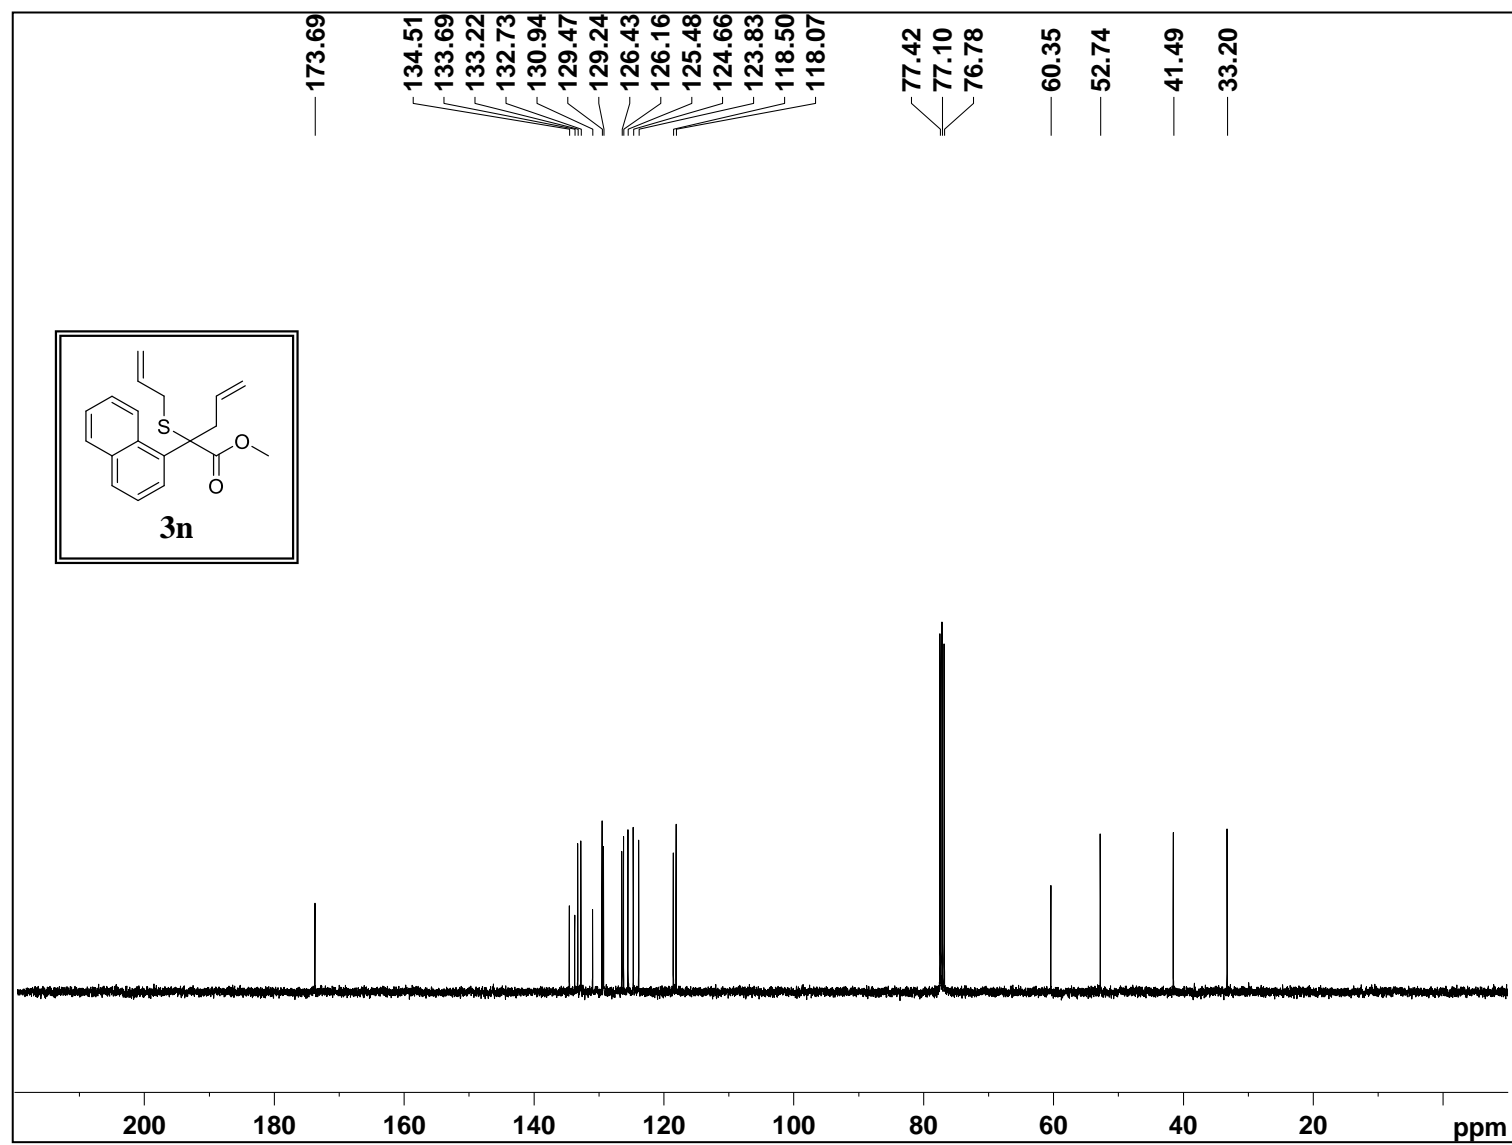

<sup>1</sup>H NMR for compound **3o** (400 MHz, CDCl<sub>3</sub>) (data)

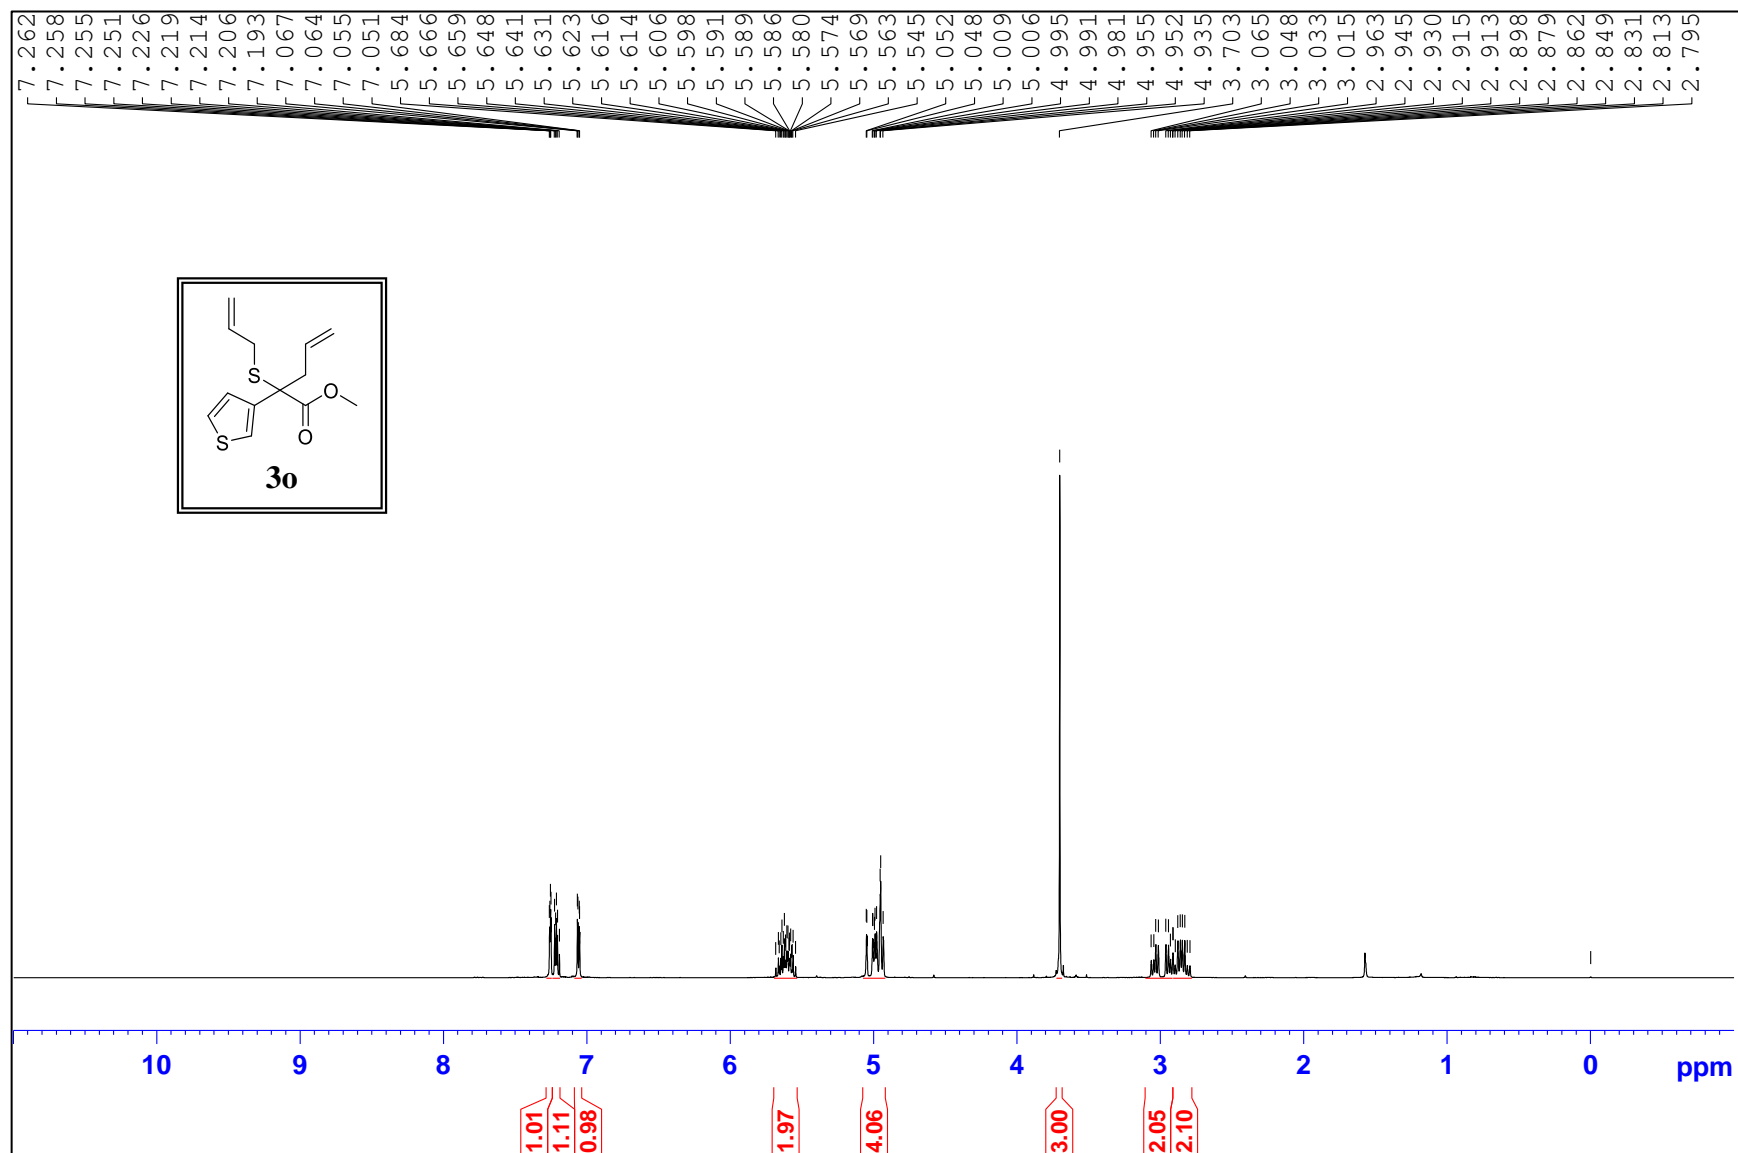

$^{13}\text{C}\{^1\text{H}\}$  NMR for compound **3o** (101 MHz,  $\text{CDCl}_3$ )

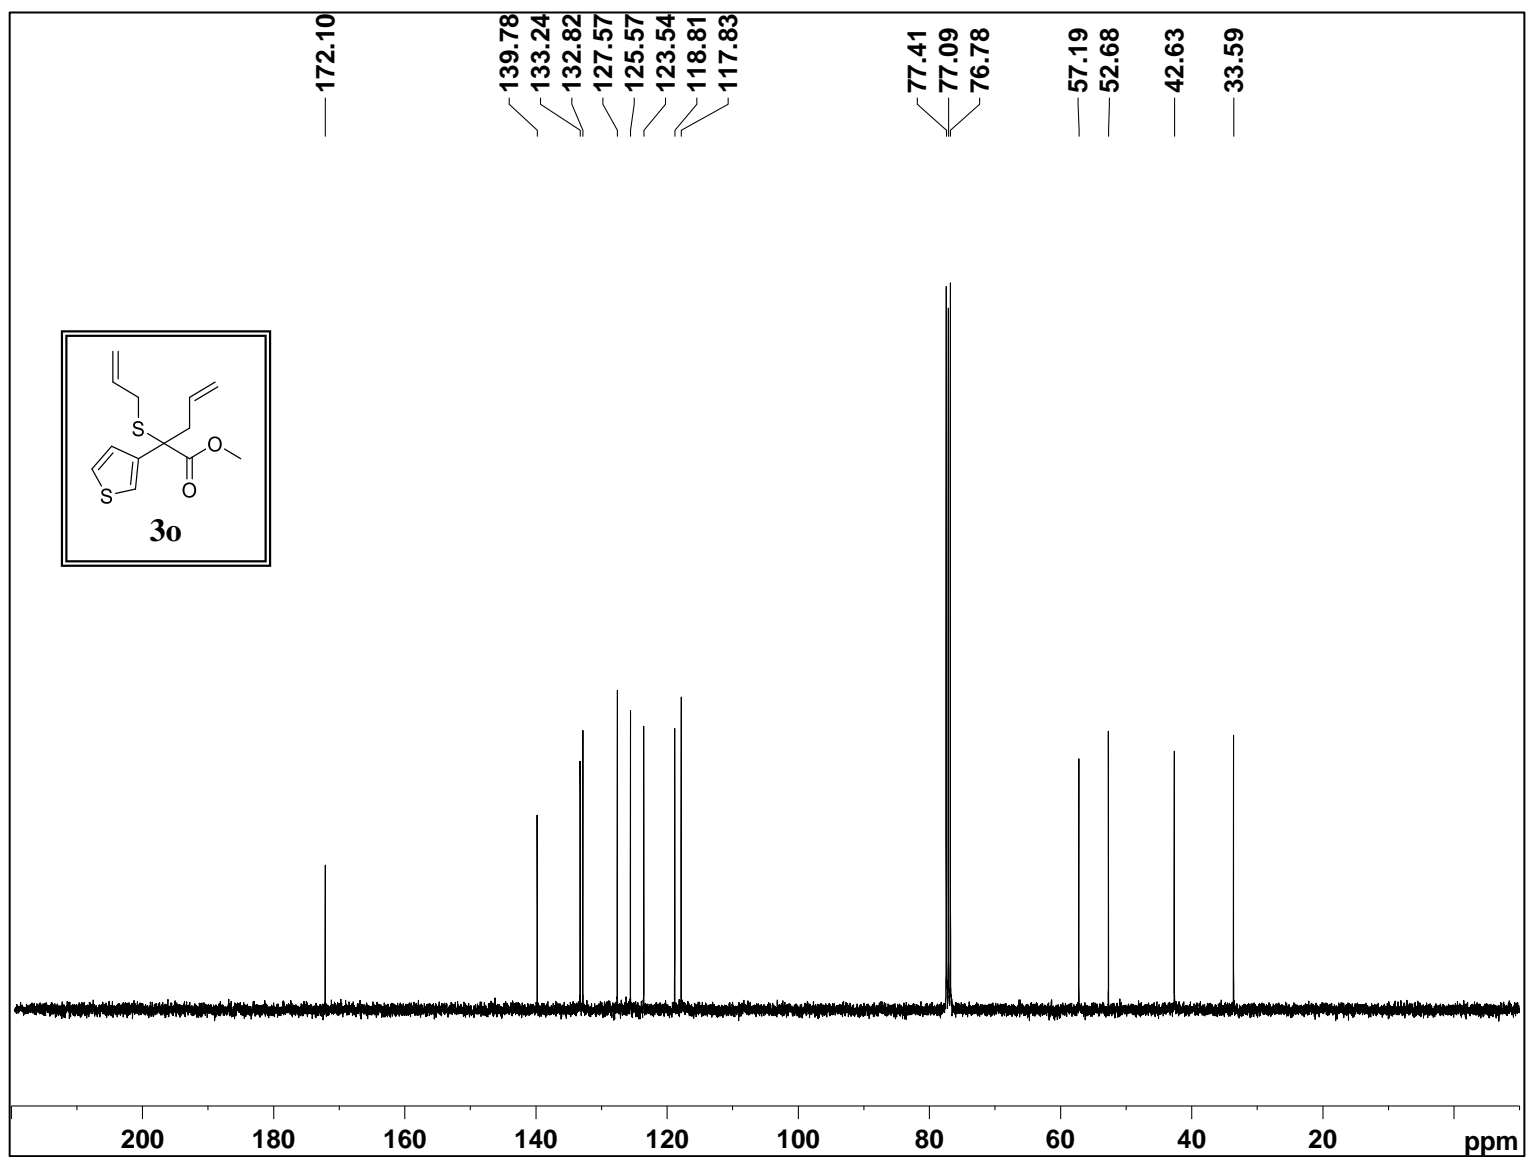

<sup>1</sup>H NMR for compound **3p** (400 MHz, CDCl<sub>3</sub>) (data)

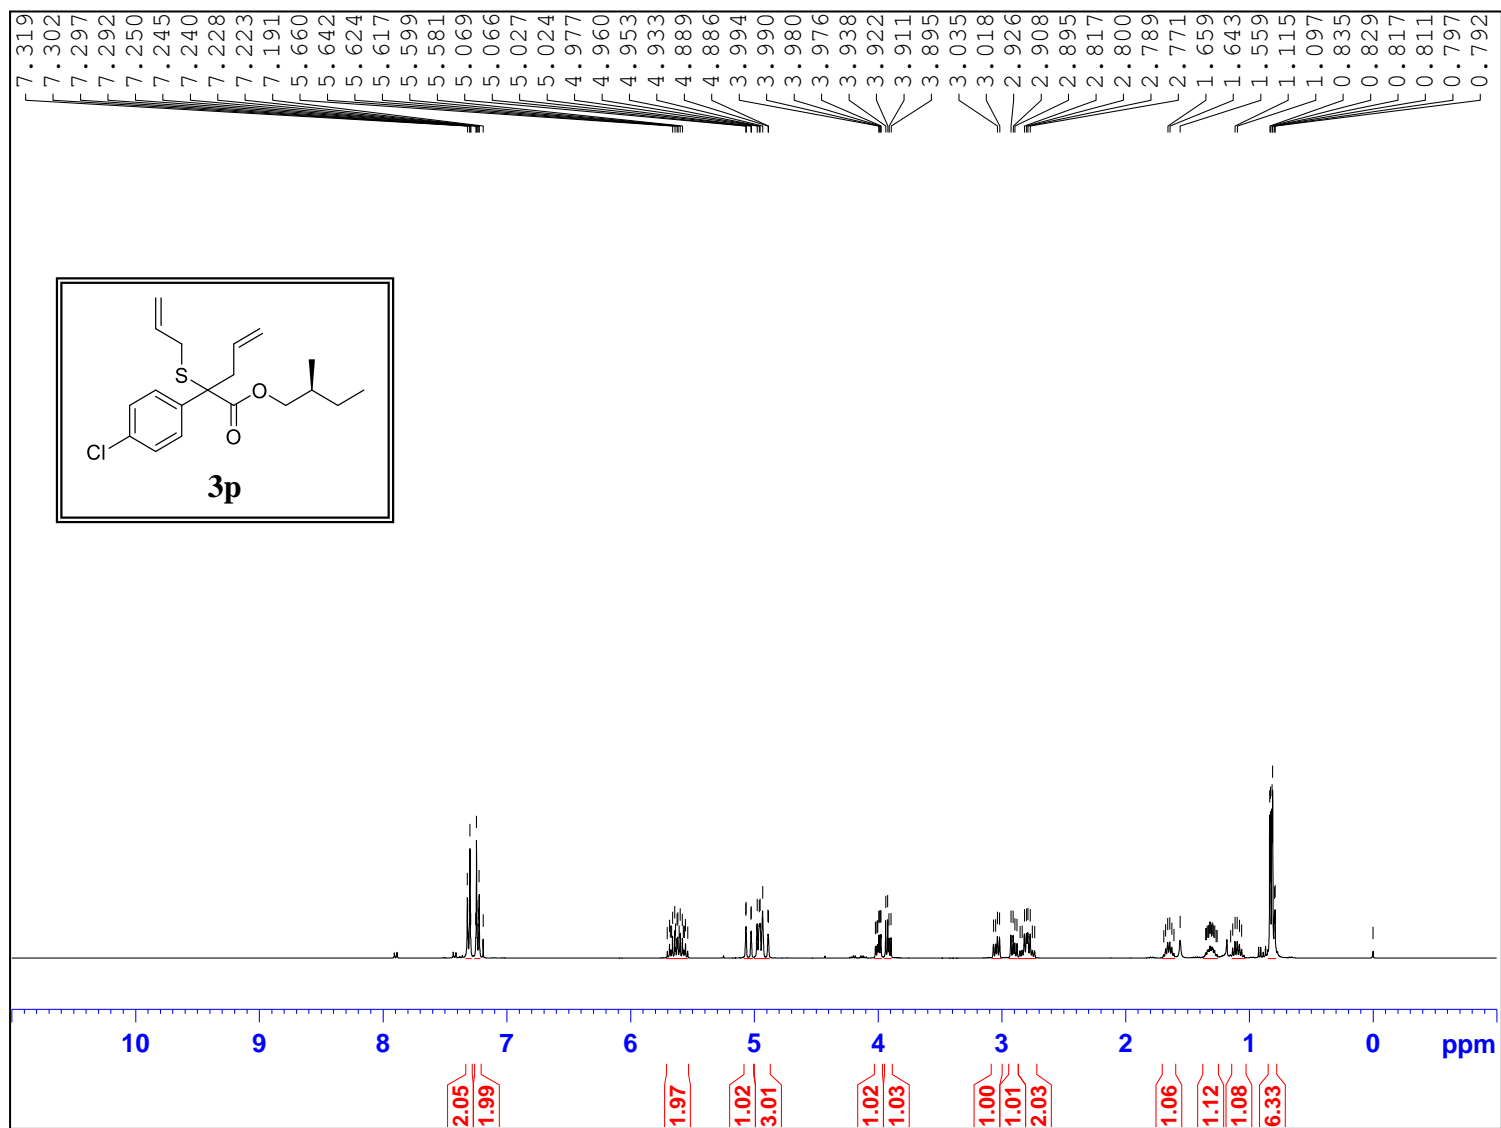

$^{13}\text{C}\{^1\text{H}\}$  NMR for compound **3p** (101 MHz,  $\text{CDCl}_3$ )

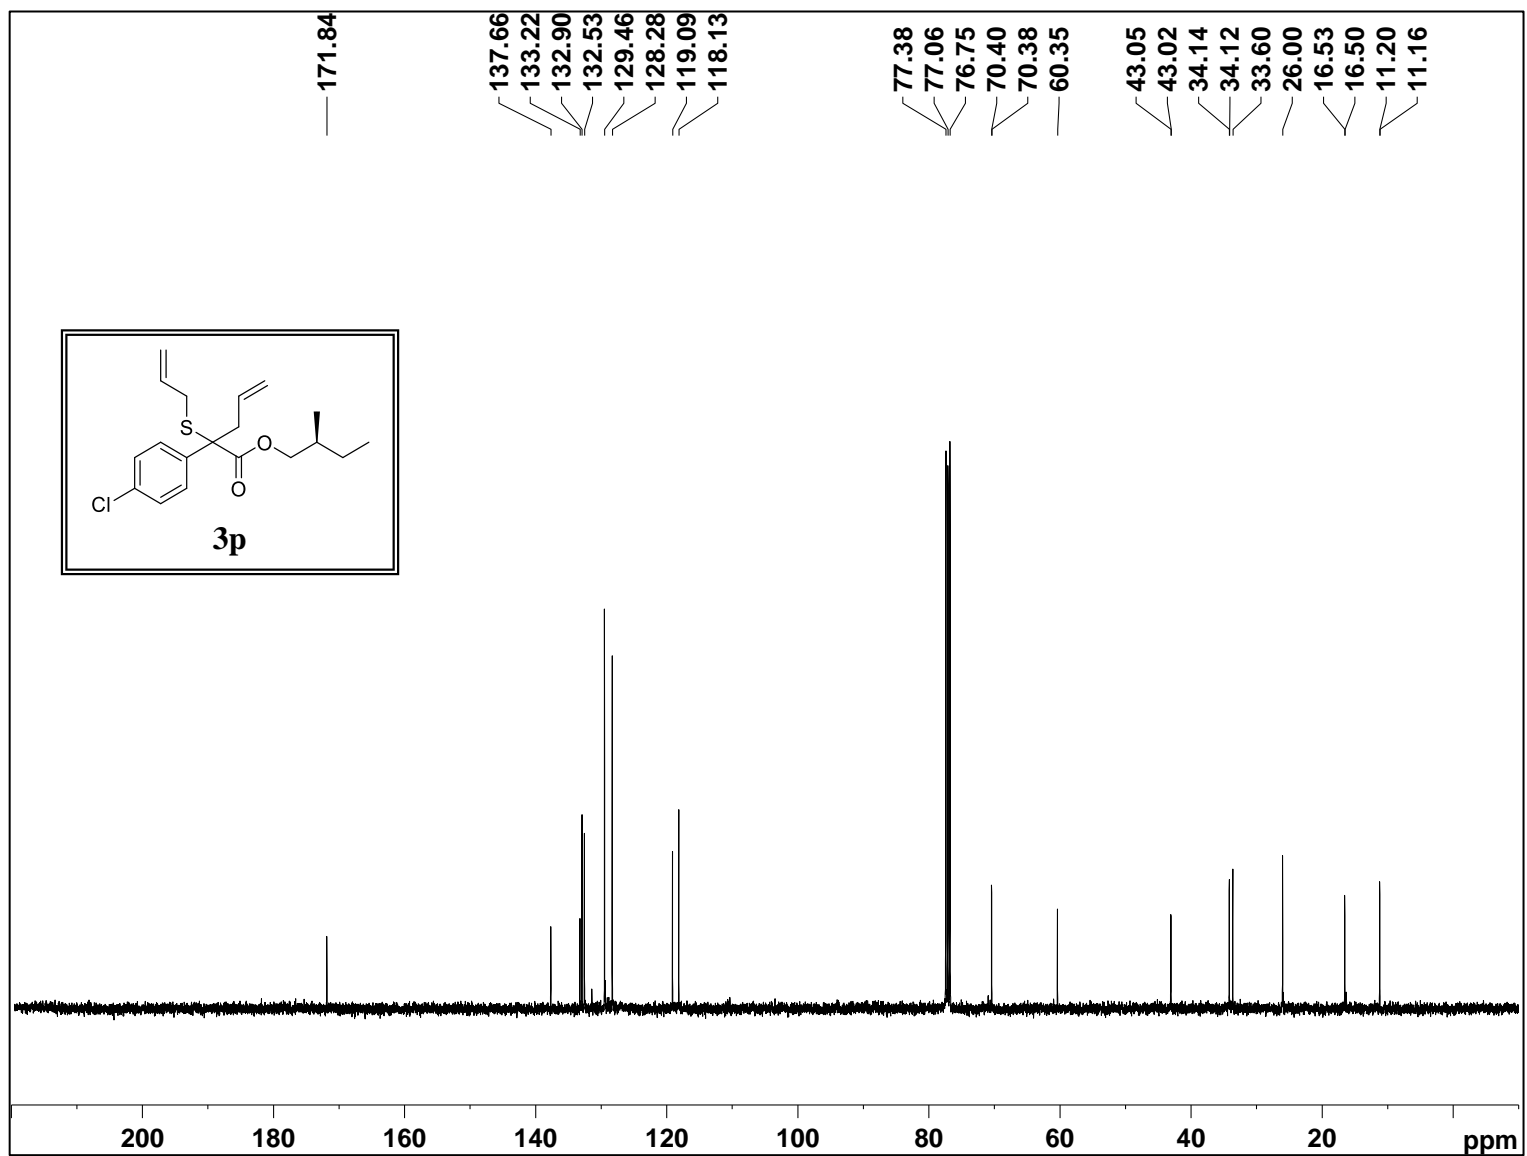

<sup>1</sup>H NMR for compound **3q** (400 MHz, CDCl<sub>3</sub>) (data)

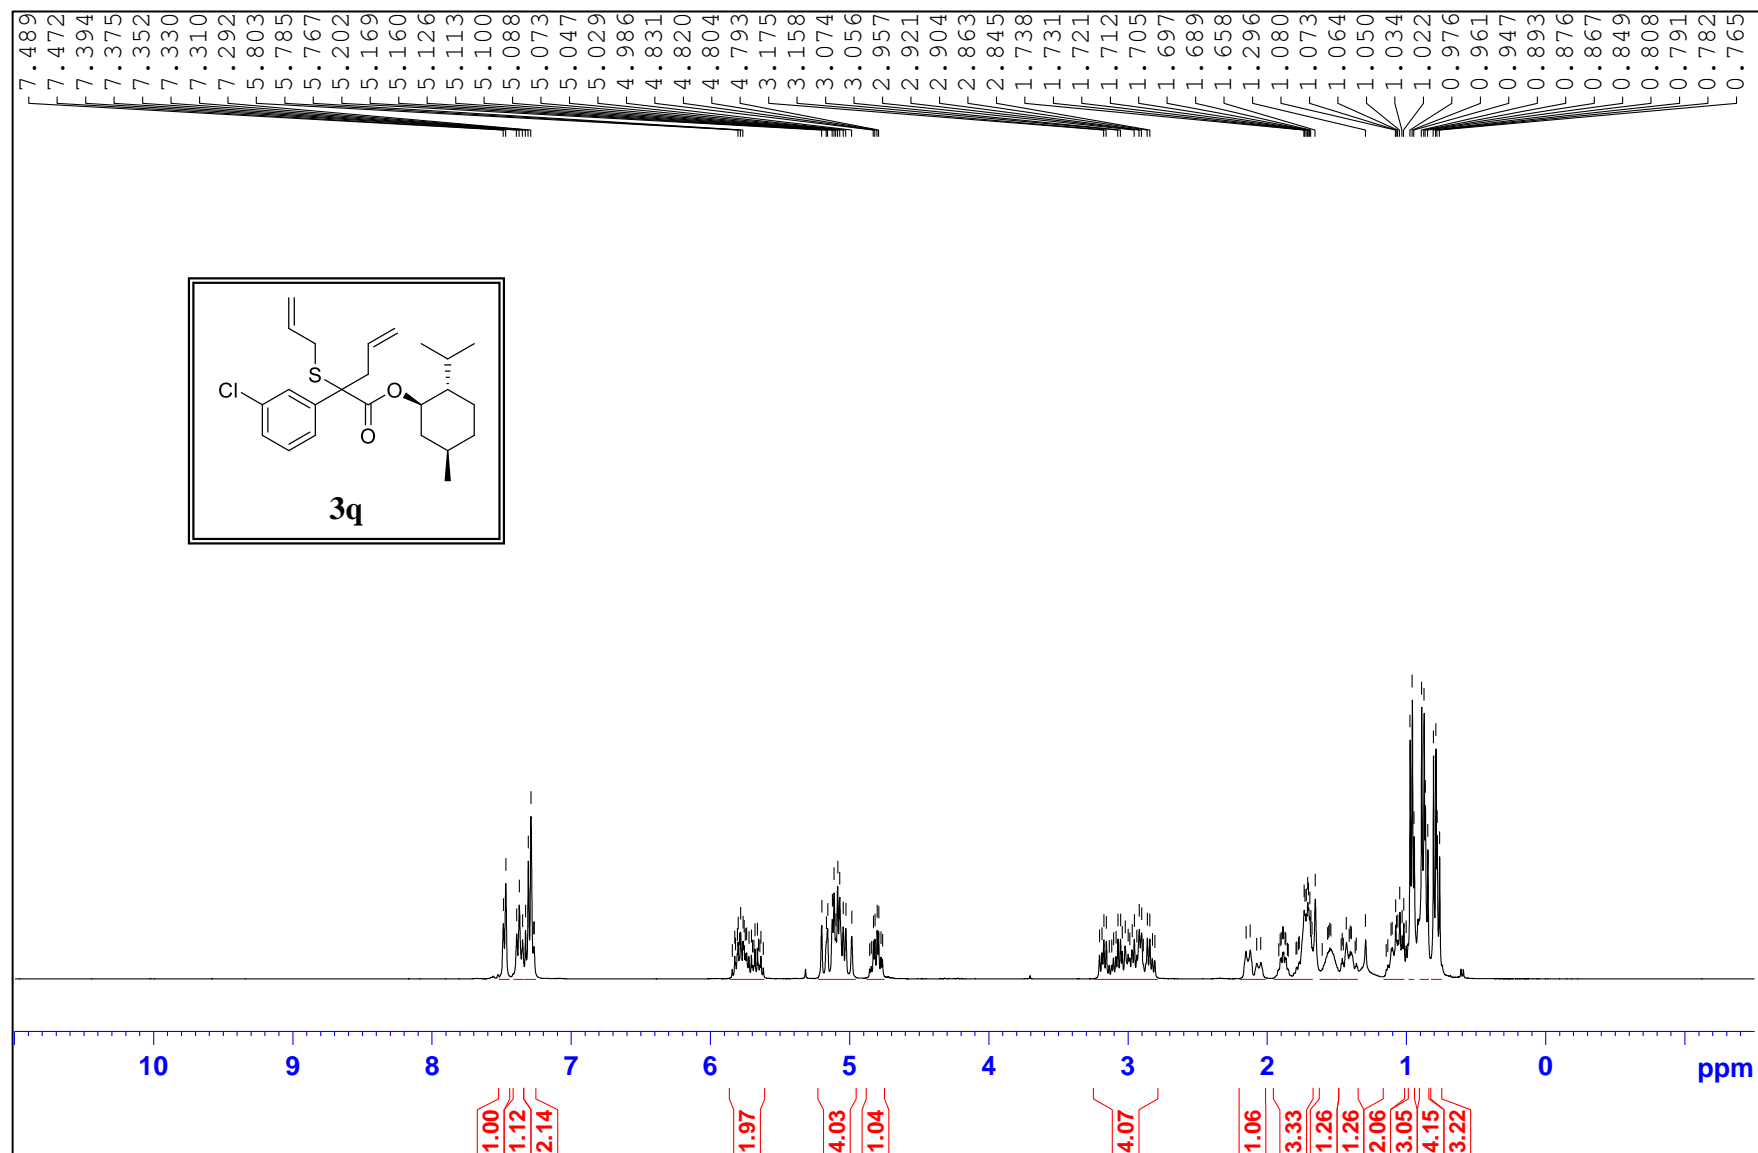



$^{13}\text{C}\{^1\text{H}\}$  NMR for compound **3q** (101 MHz,  $\text{CDCl}_3$ )

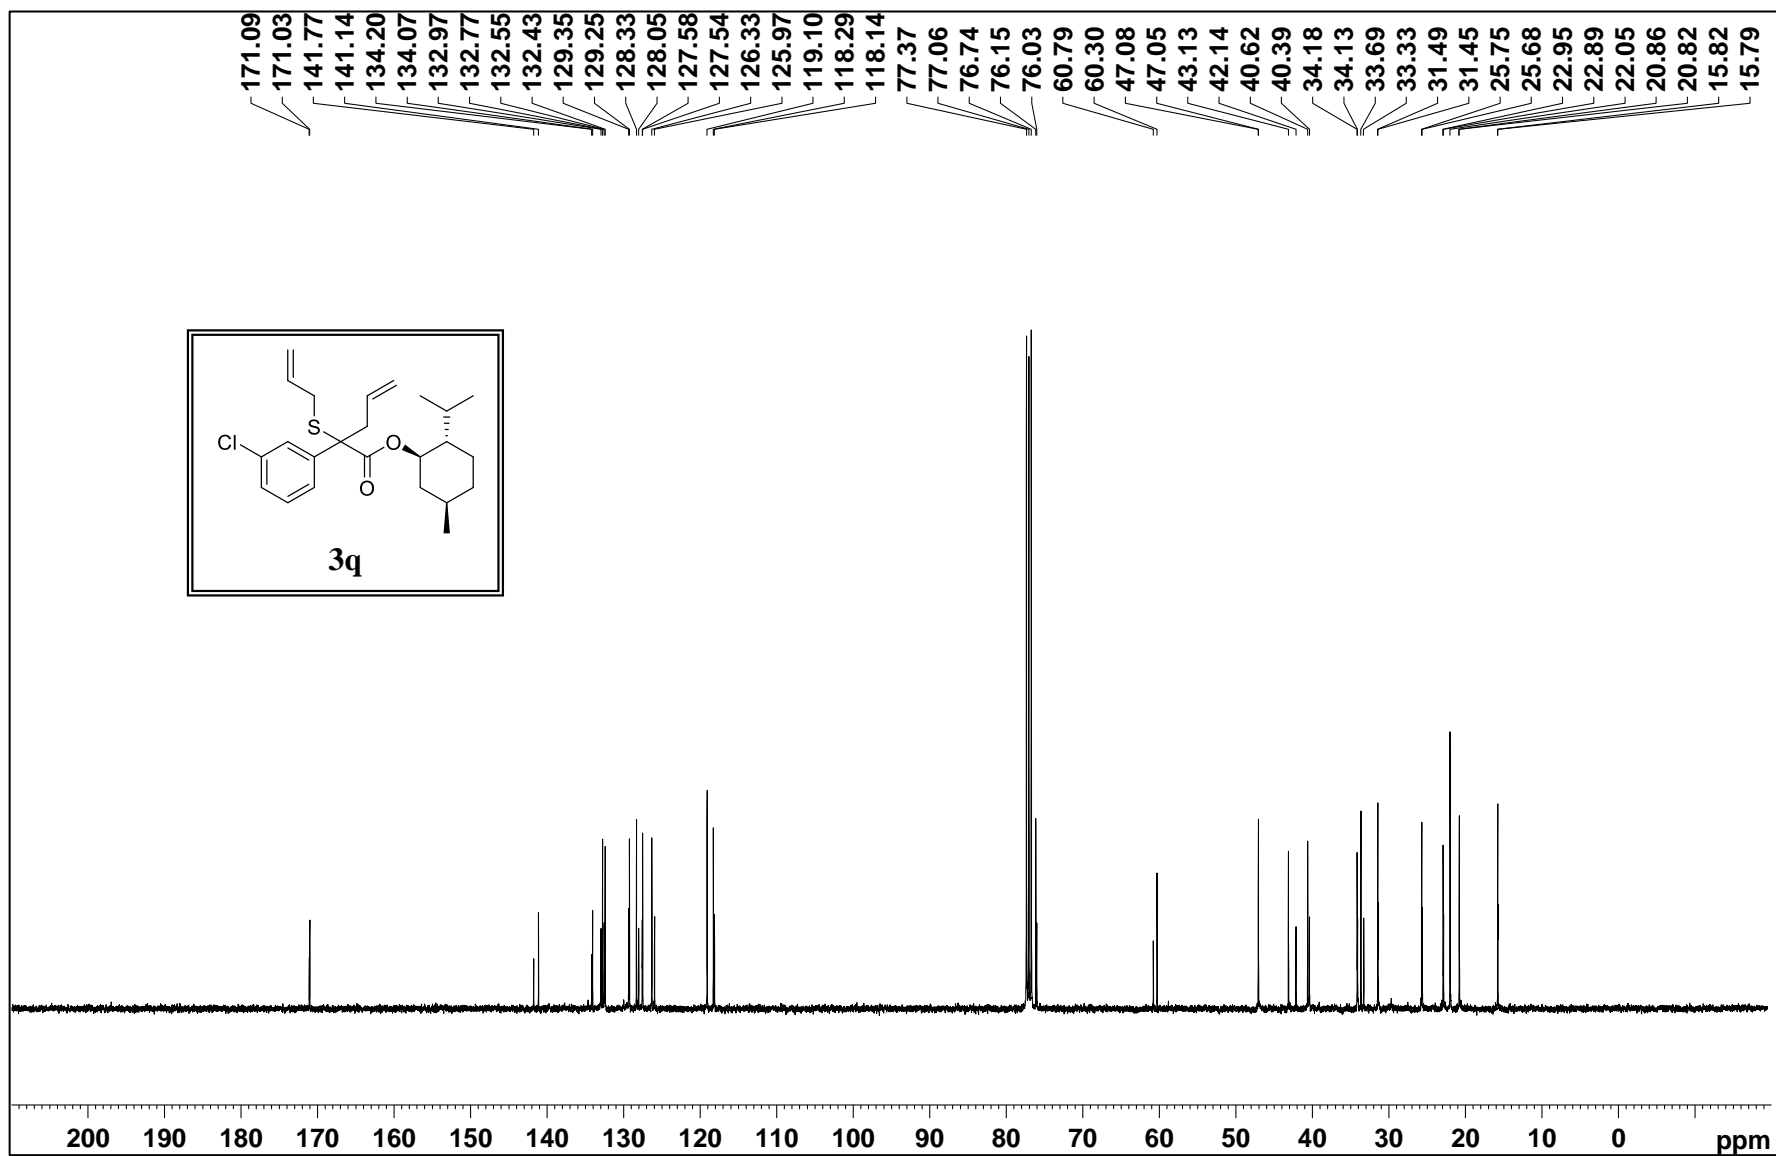

$^{13}\text{C}\{^1\text{H}\}$  DEPT-135 NMR for compound **3q** (101 MHz,  $\text{CDCl}_3$ )

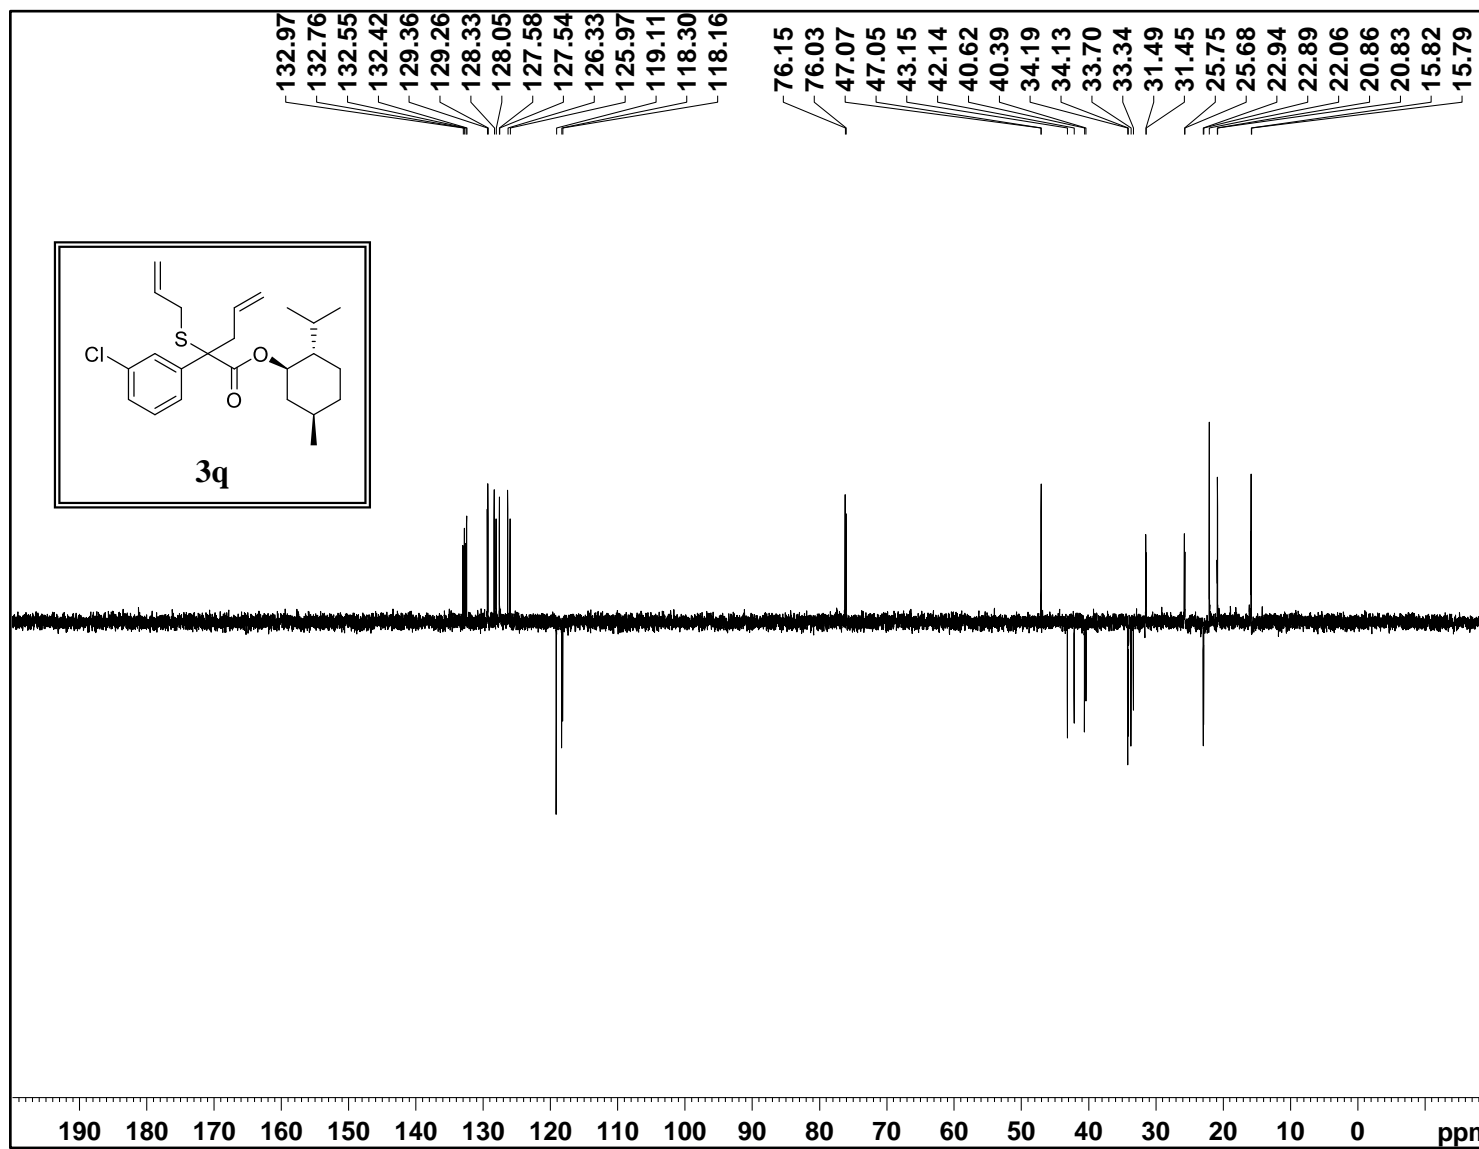

<sup>1</sup>H NMR for compound **3r** (400 MHz, CDCl<sub>3</sub>)

(data)

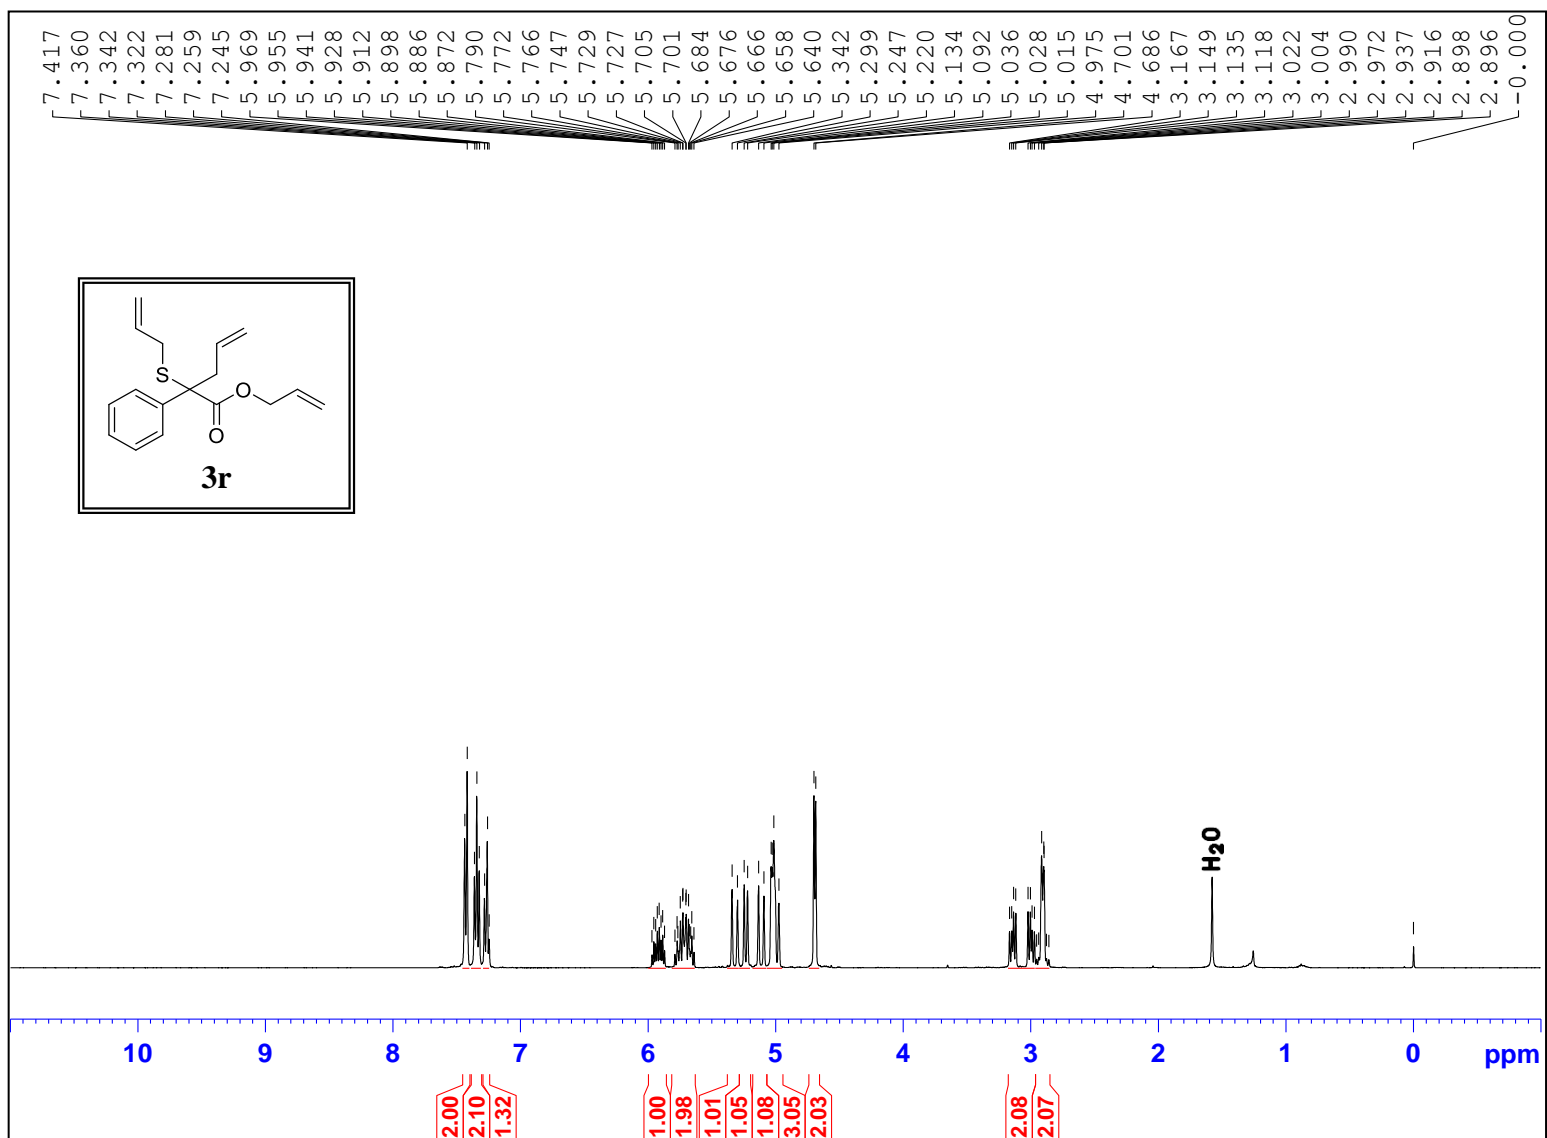

$^{13}\text{C}\{^1\text{H}\}$  NMR for compound **3r** (101 MHz,  $\text{CDCl}_3$ )

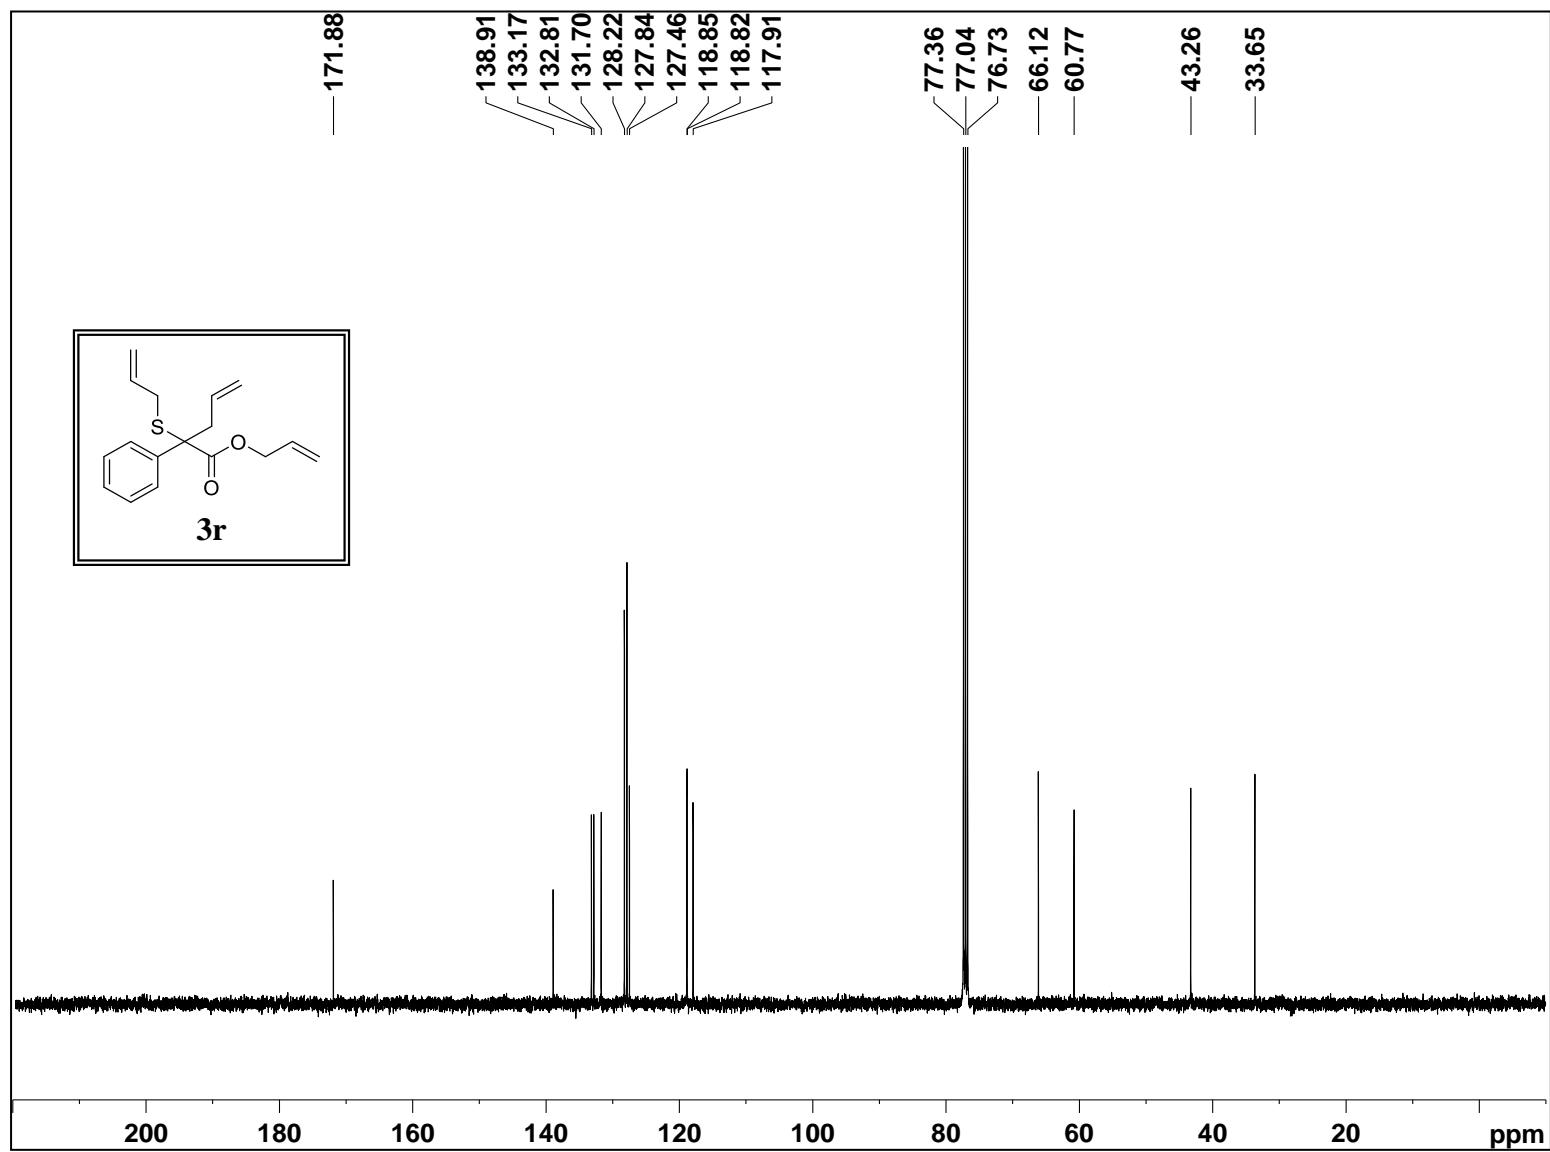

<sup>1</sup>H NMR for compound **3s** (400 MHz, CDCl<sub>3</sub>)

(data)

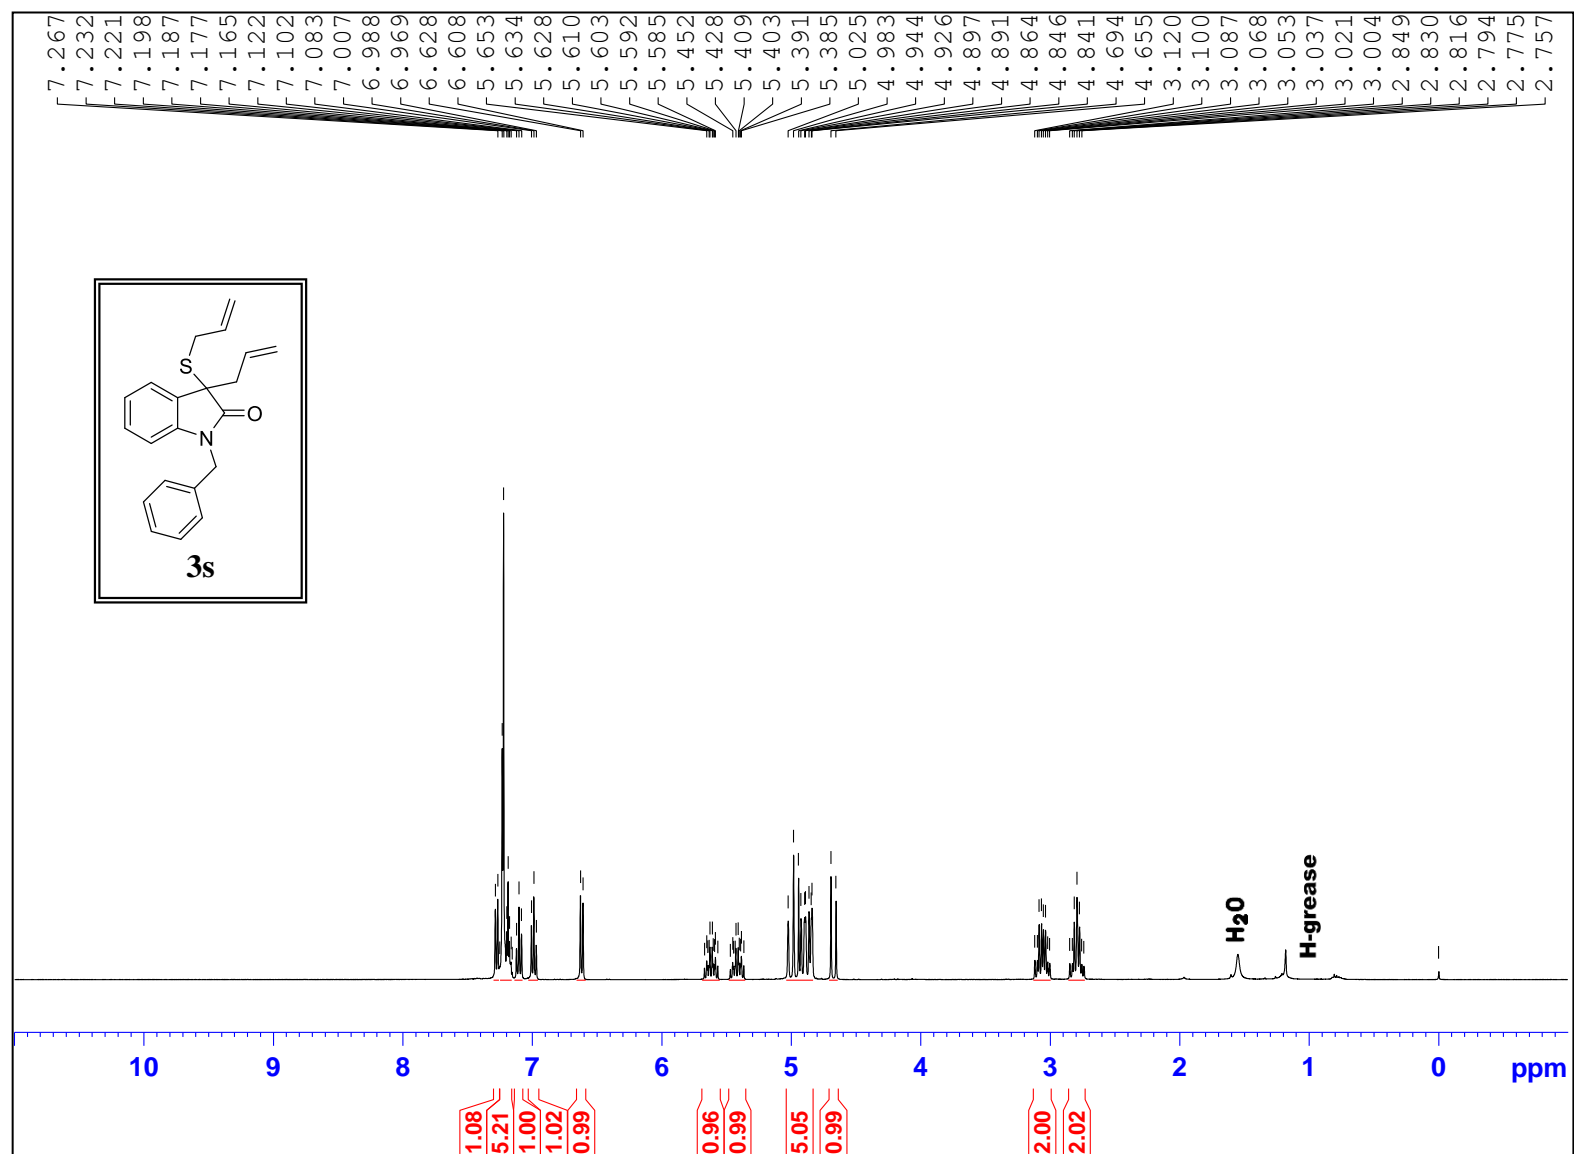

$^{13}\text{C}\{^1\text{H}\}$  NMR for compound **3s** (101 MHz,  $\text{CDCl}_3$ )

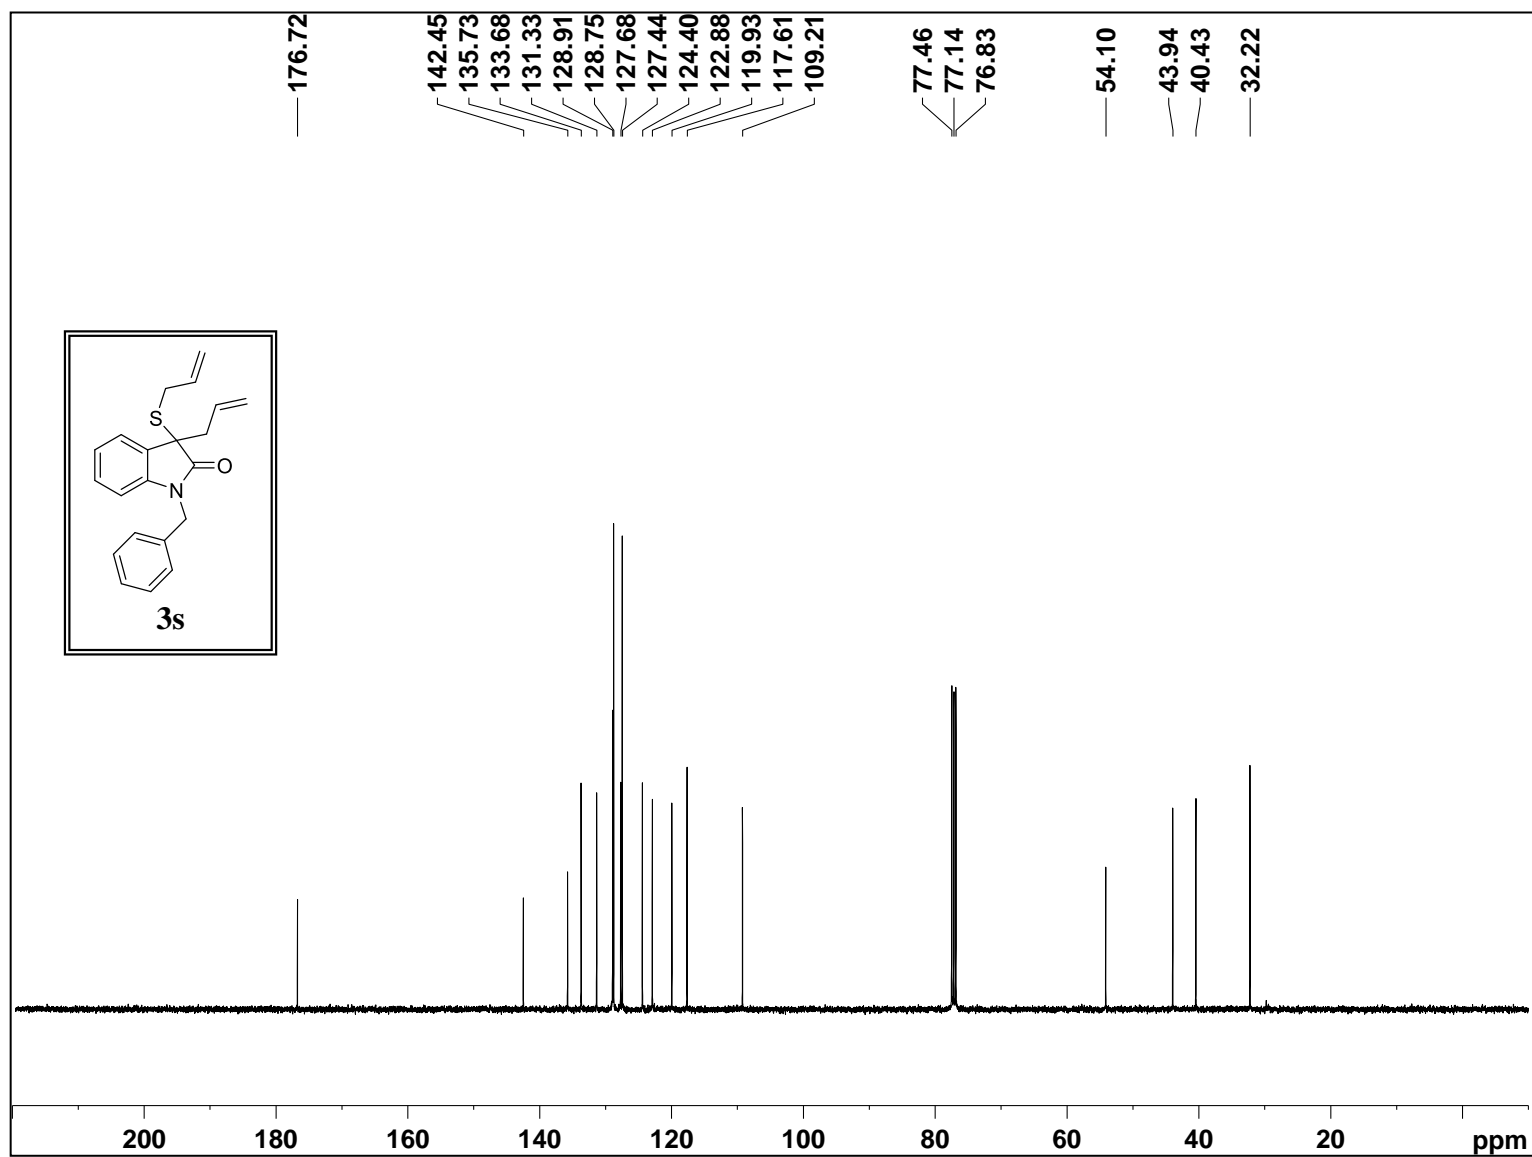

[<sup>1</sup>H, <sup>1</sup>H] COSY for compound **3s** (400 MHz, CDCl<sub>3</sub>)

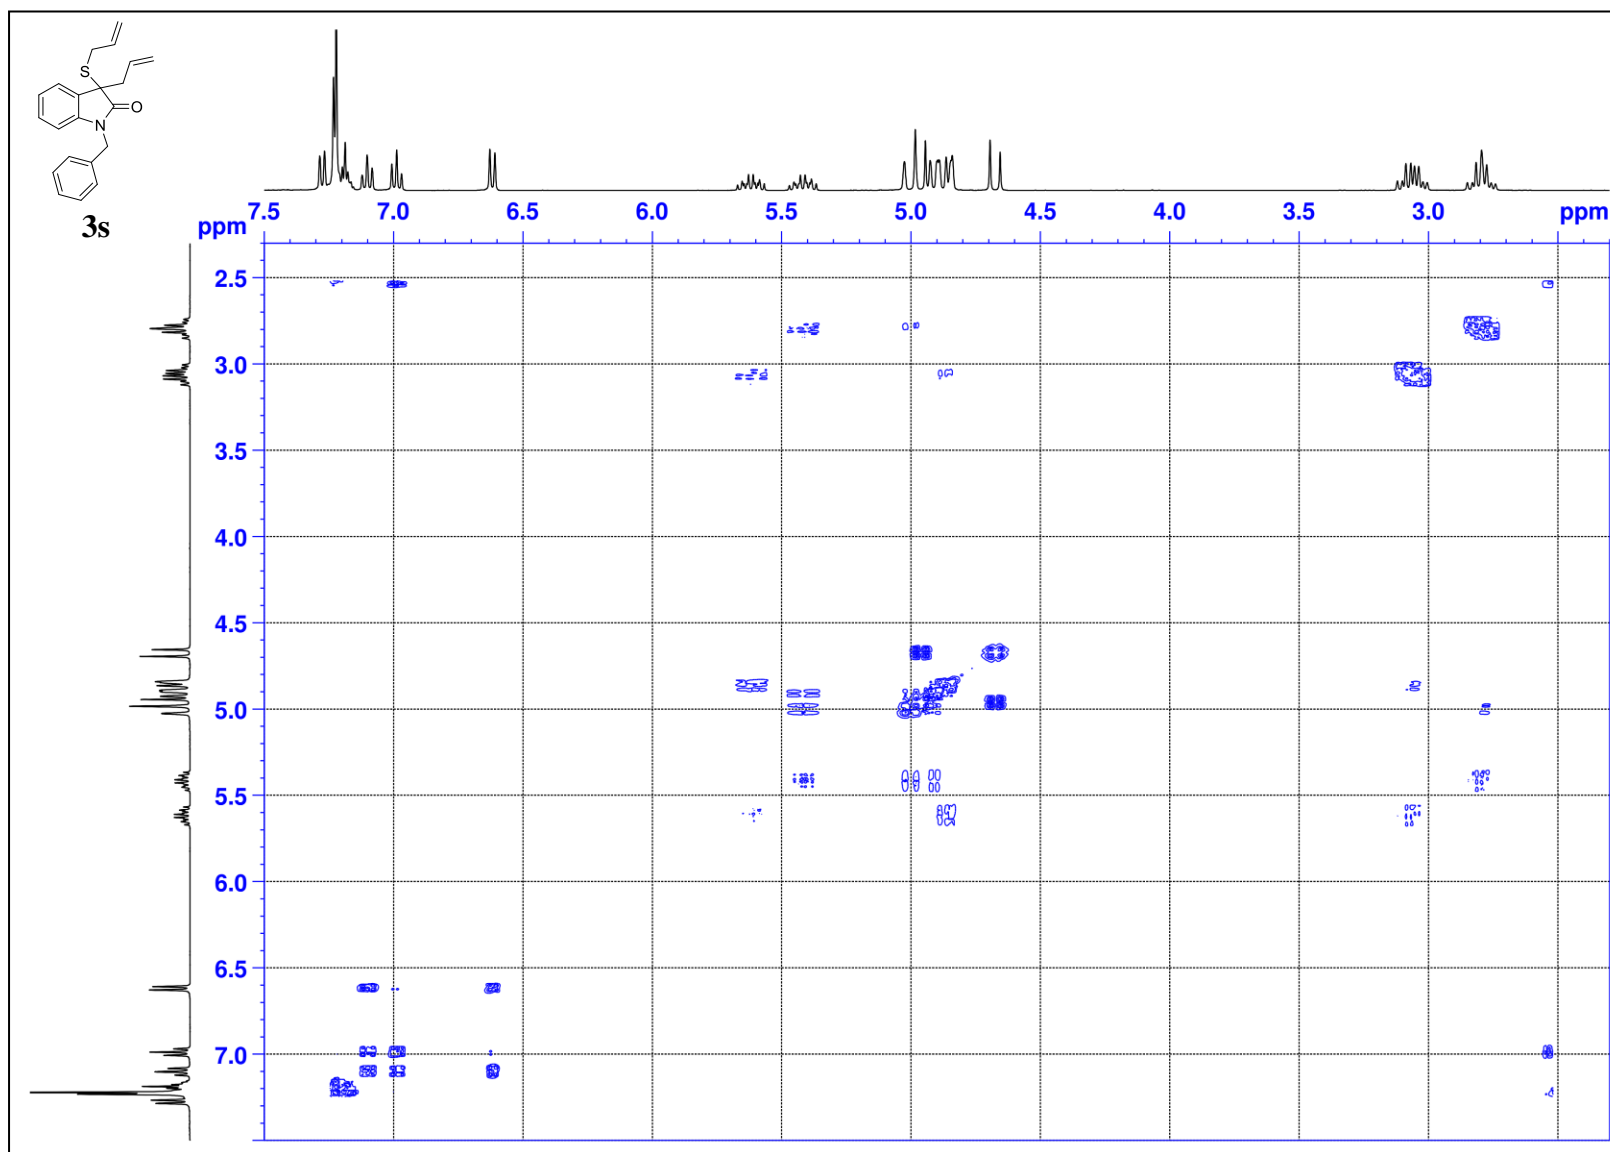

[<sup>1</sup>H, <sup>13</sup>C{<sup>1</sup>H}] HSQC for compound **3s** (400 MHz, CDCl<sub>3</sub>)

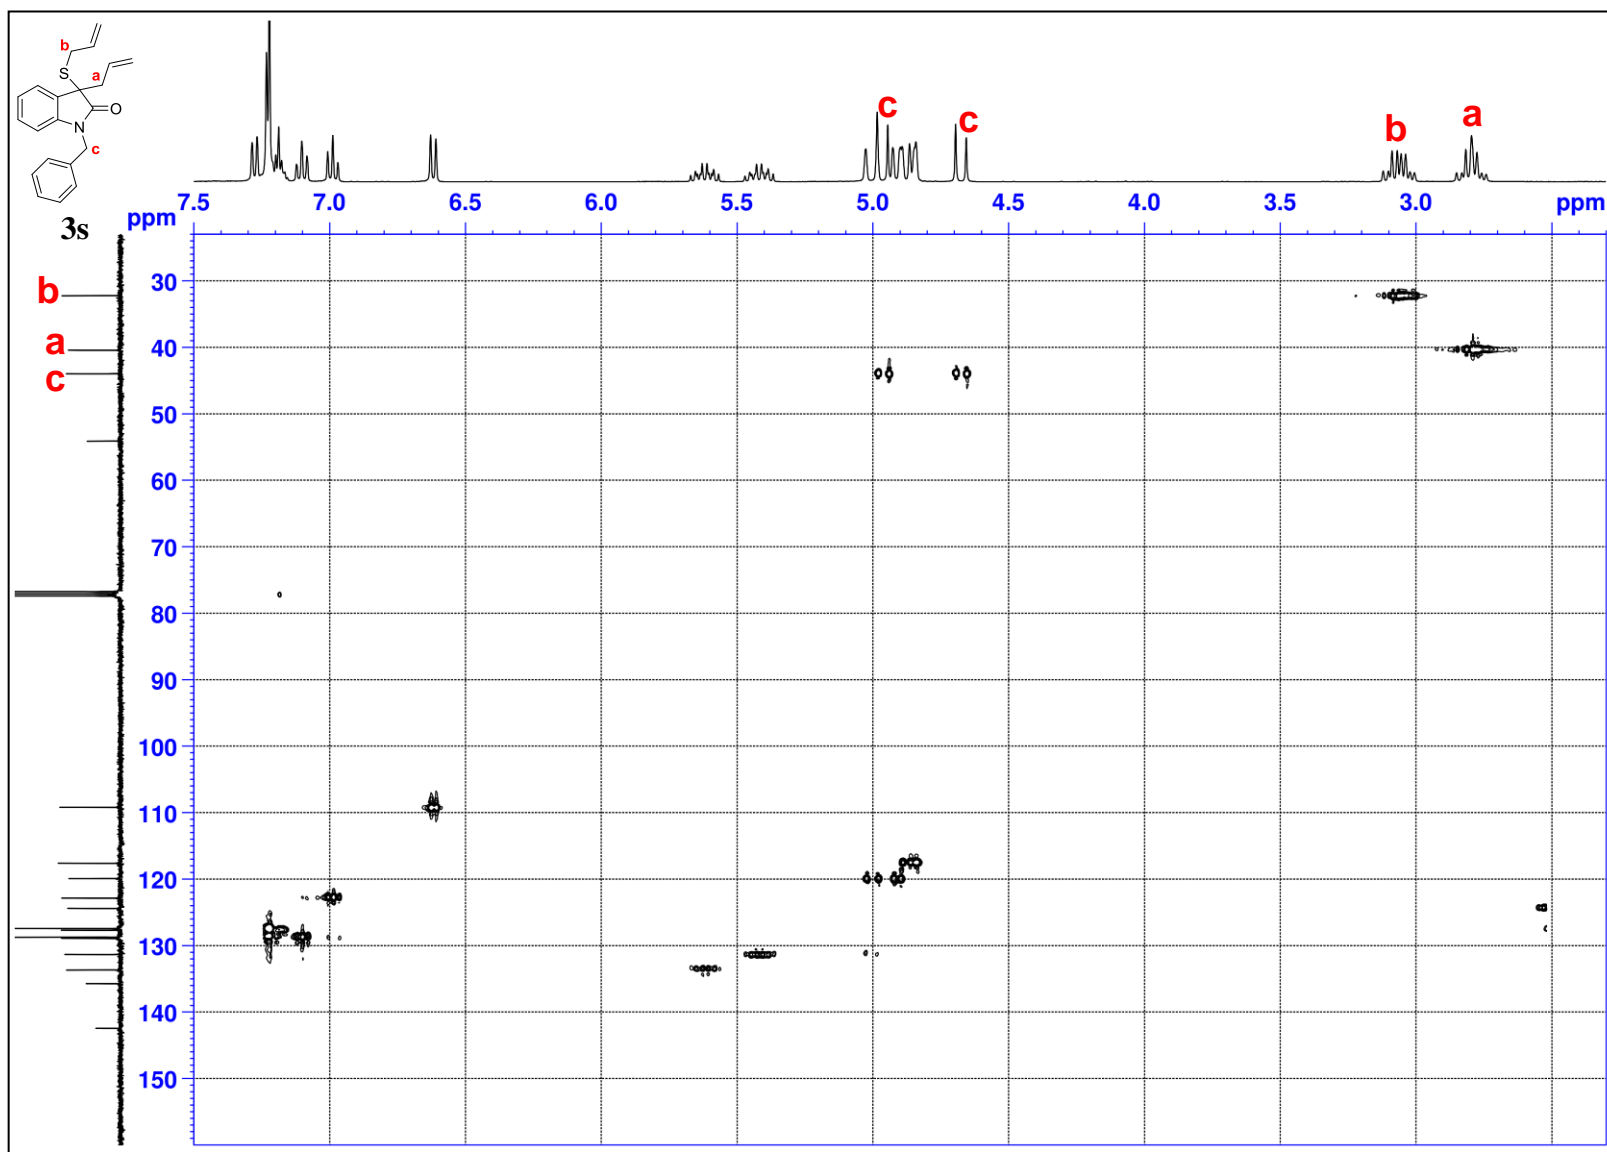



$^{13}\text{C}\{^1\text{H}\}$  DEPT-135 NMR for compound **3s** (101 MHz,  $\text{CDCl}_3$ )

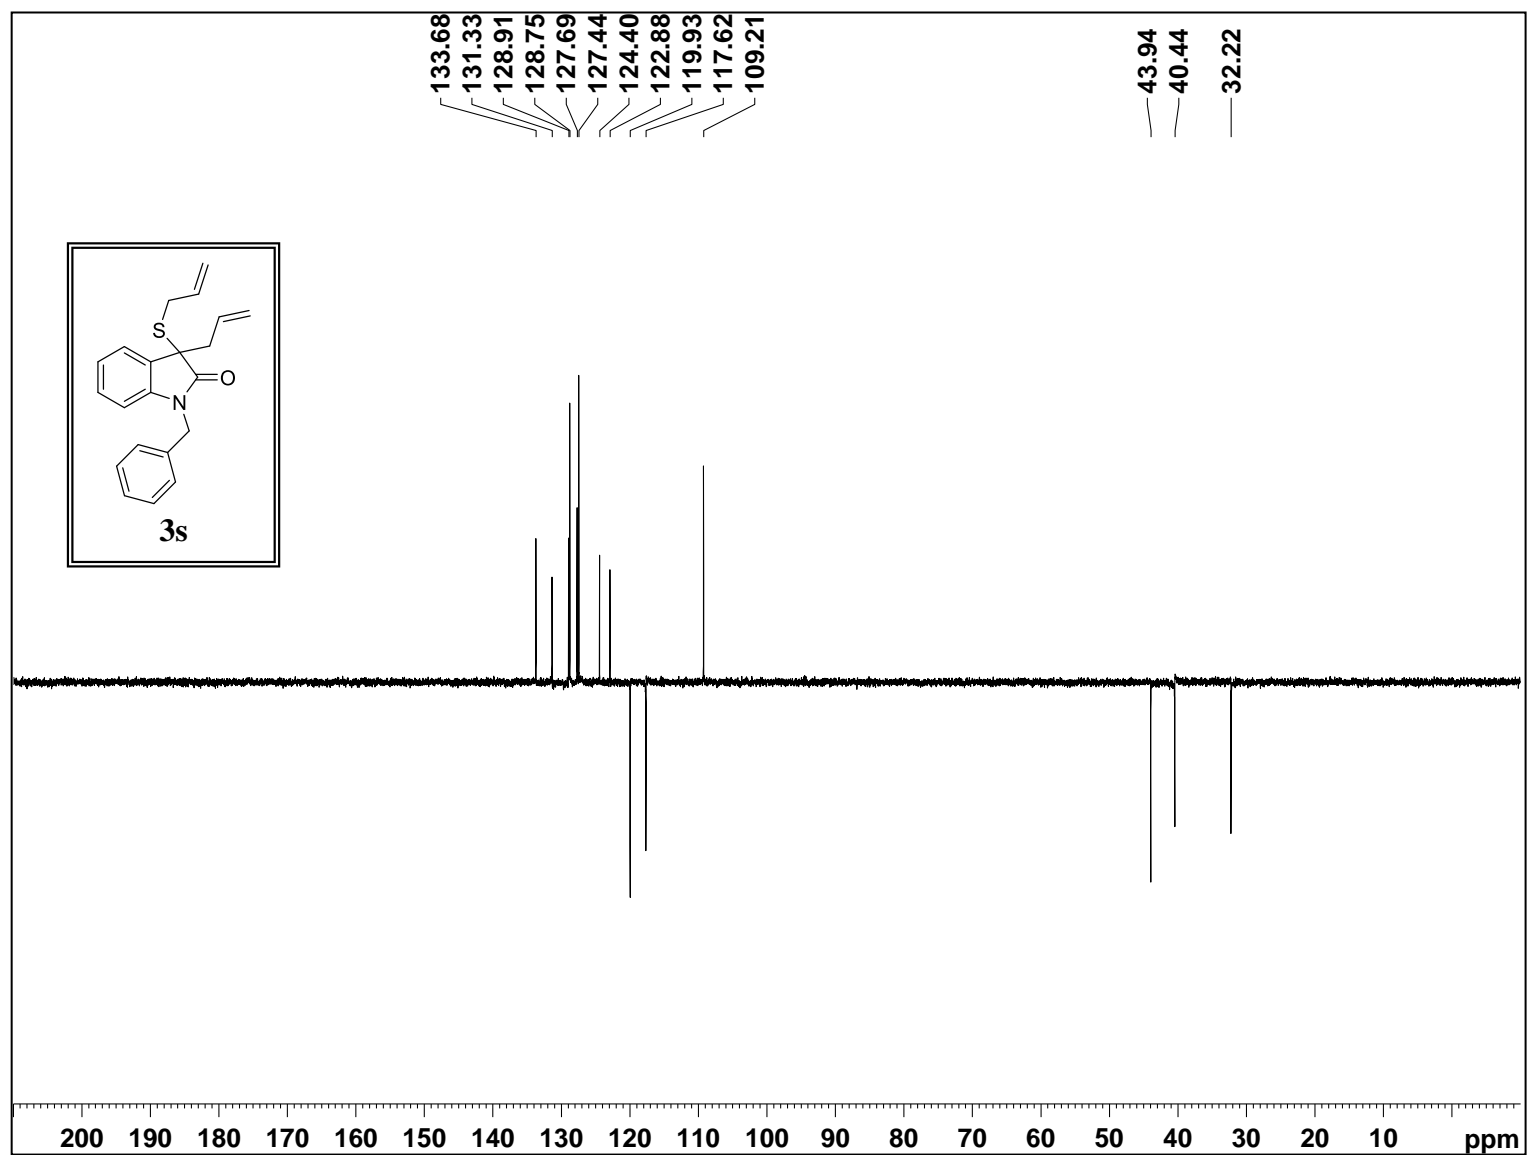

<sup>1</sup>H NMR for compound **3t** (400 MHz, CDCl<sub>3</sub>)

(data)

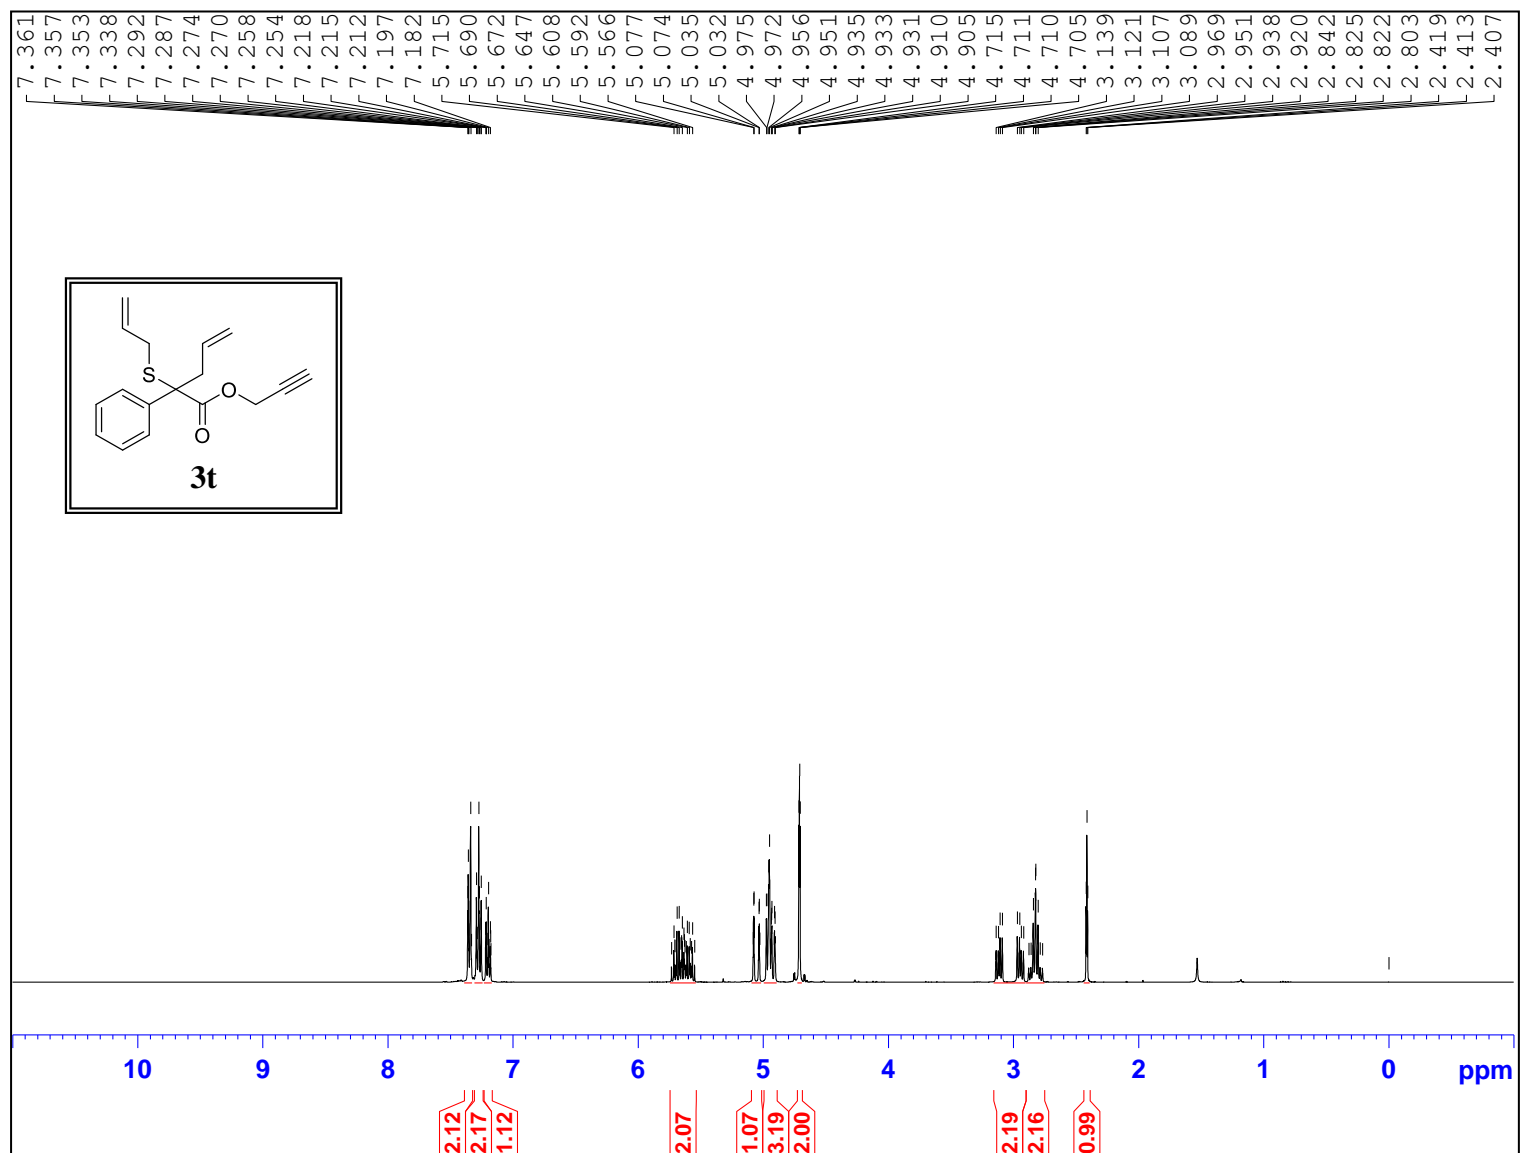

$^{13}\text{C}\{^1\text{H}\}$  NMR for compound **3t** (101 MHz,  $\text{CDCl}_3$ )

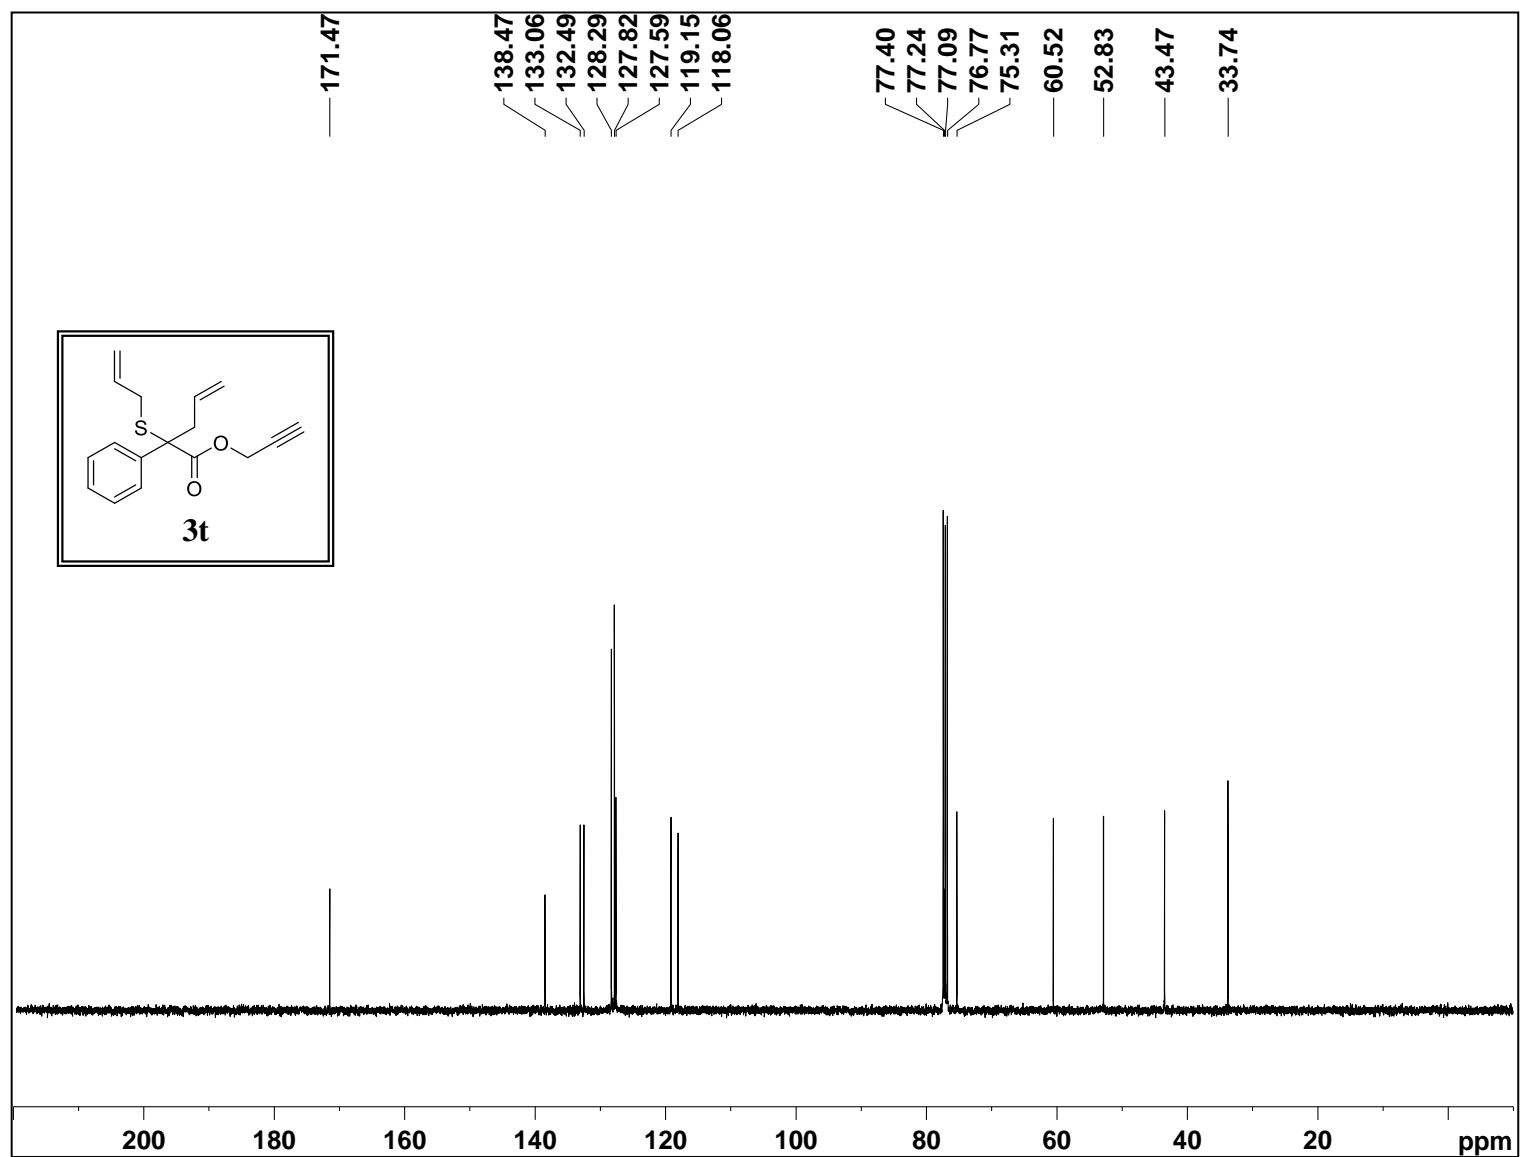

<sup>1</sup>H NMR for compound **3u** (400 MHz, CDCl<sub>3</sub>) (data)

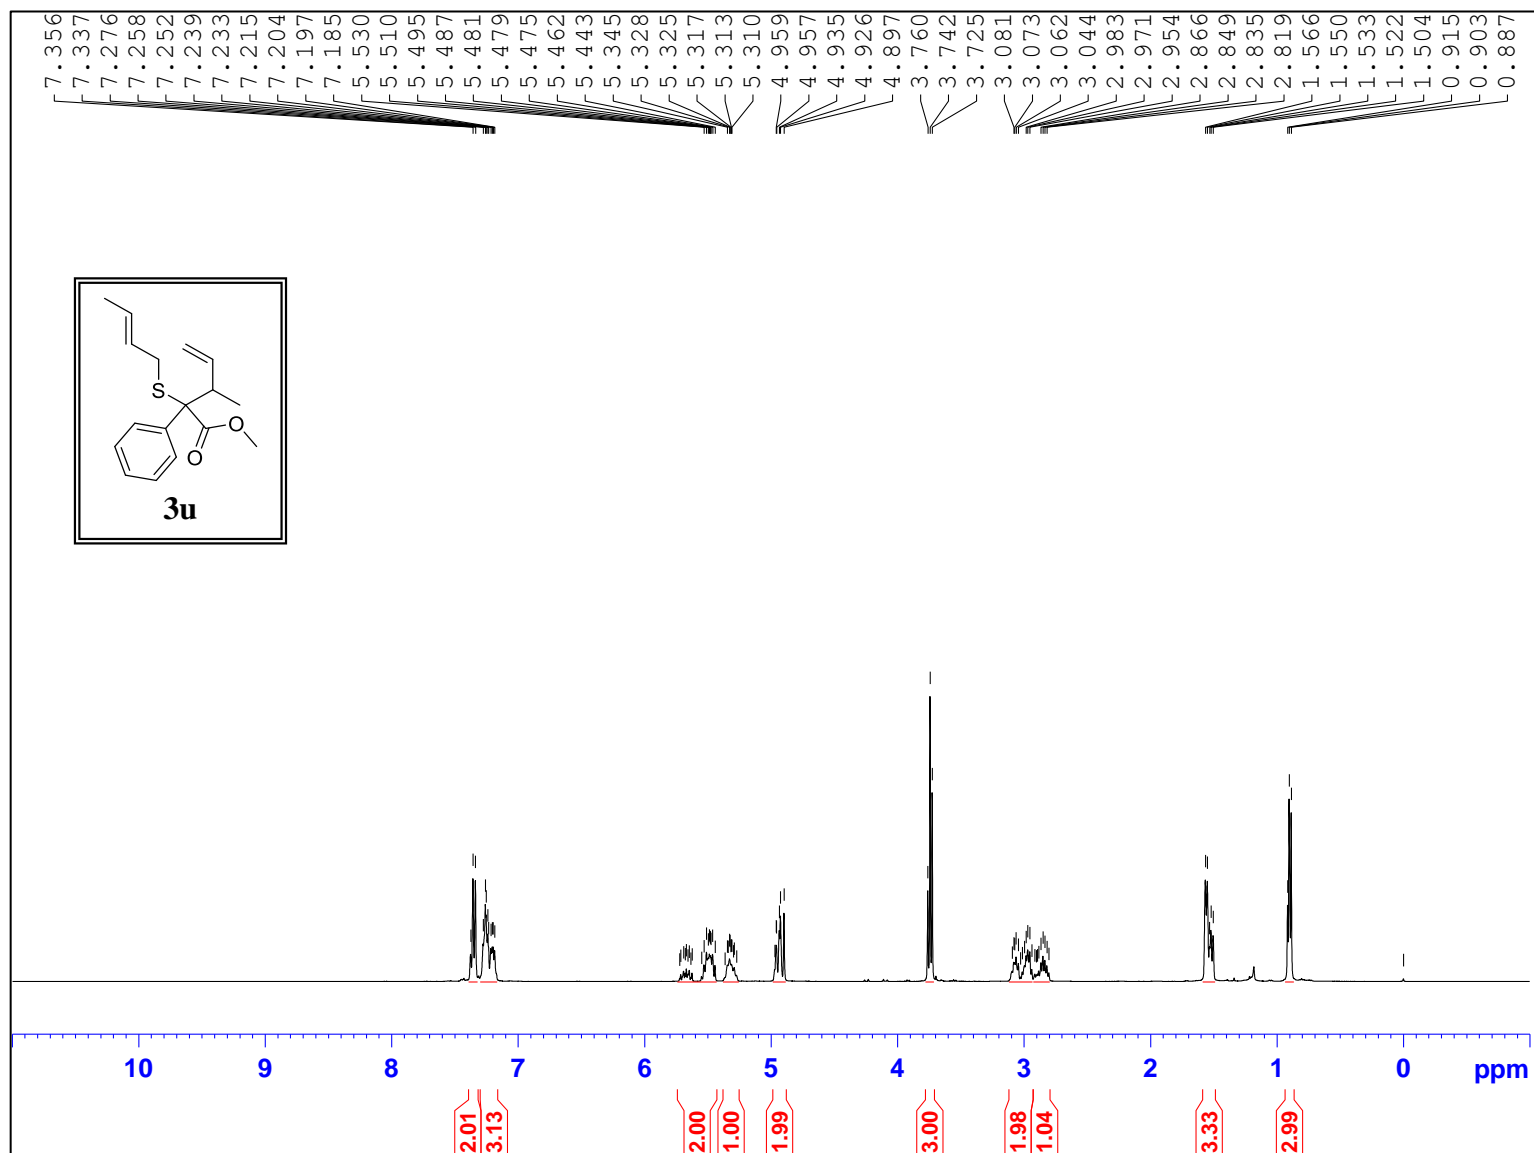

$^{13}\text{C}\{^1\text{H}\}$  NMR for compound **3u** (101 MHz,  $\text{CDCl}_3$ )

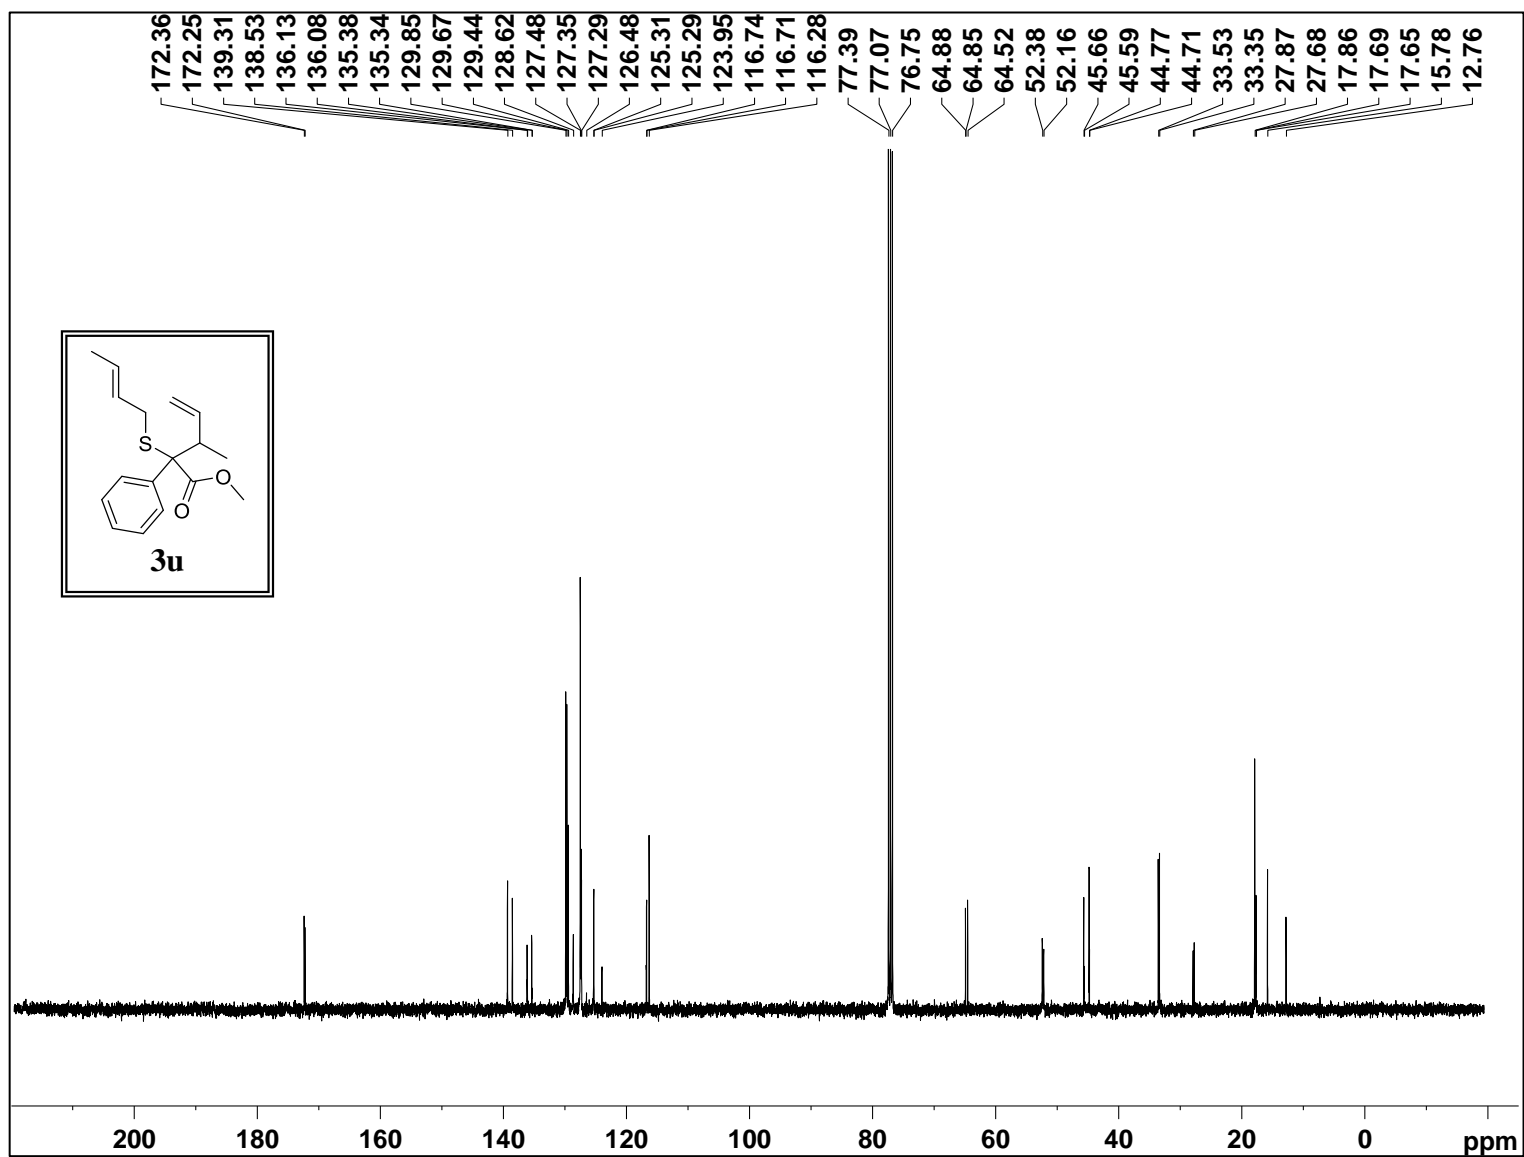

$^{13}\text{C}\{^1\text{H}\}$  DEPT-135 NMR for compound **3u** (101 MHz,  $\text{CDCl}_3$ )

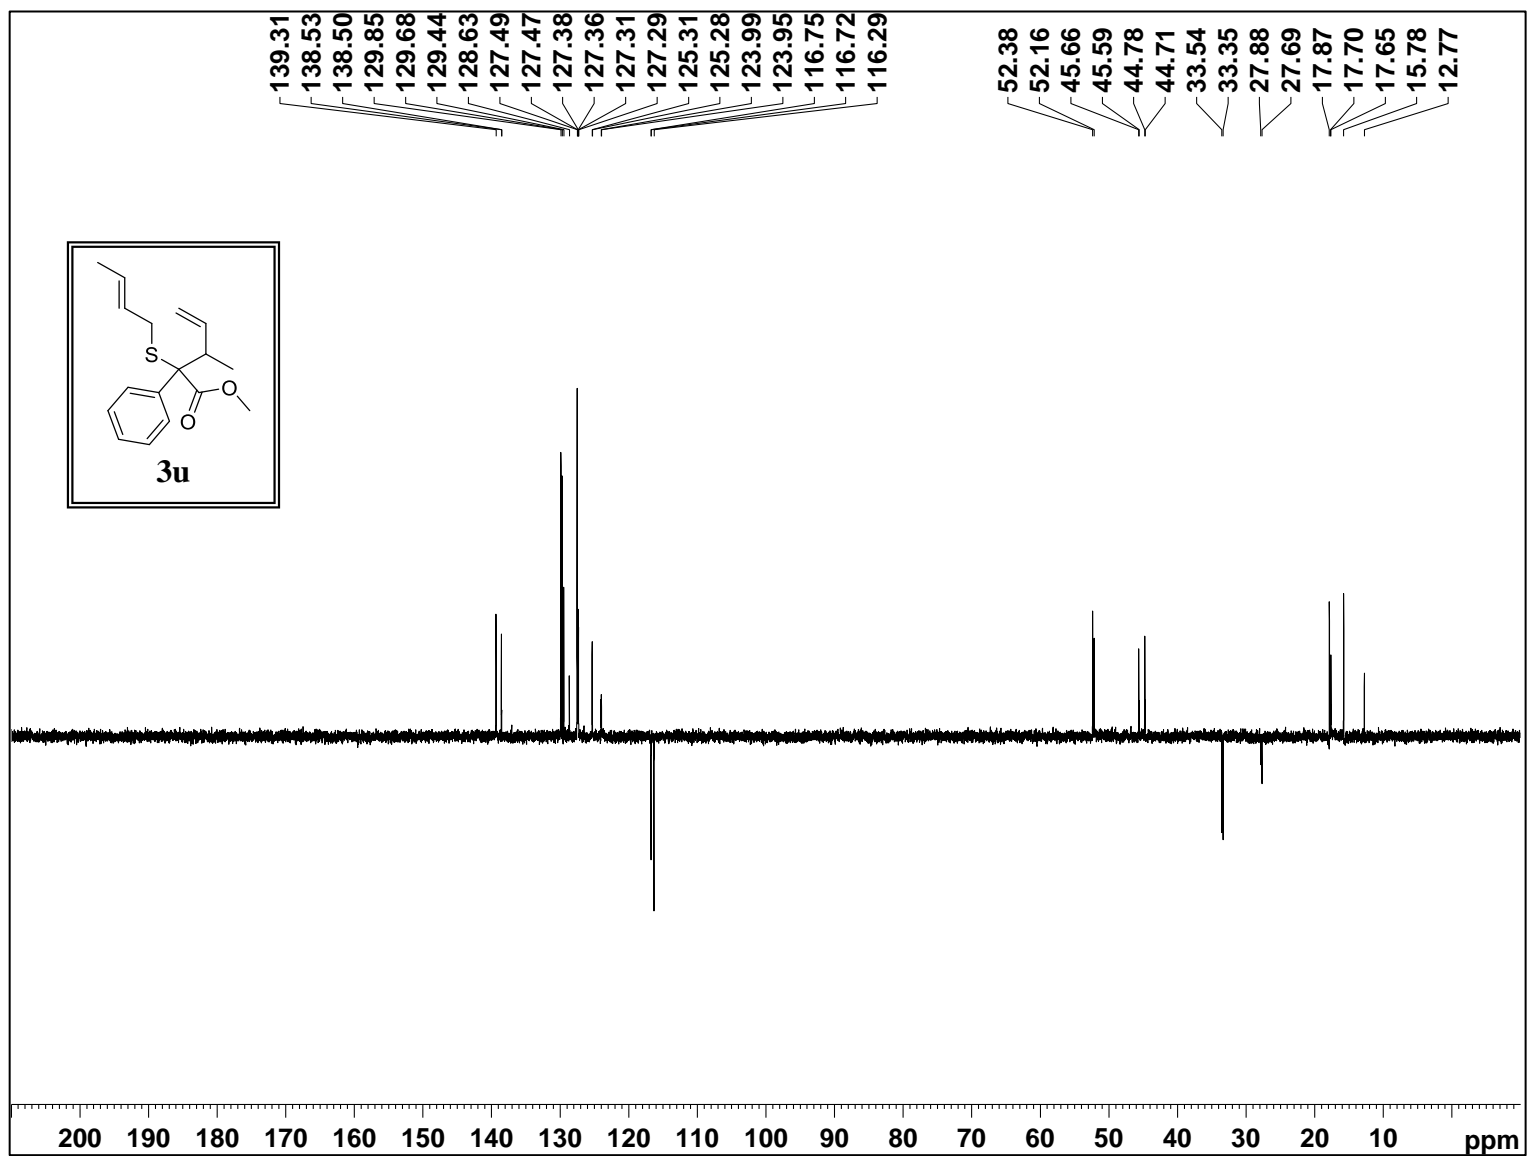

<sup>1</sup>H NMR for compound **4a** (400 MHz, CDCl<sub>3</sub>)

(data)

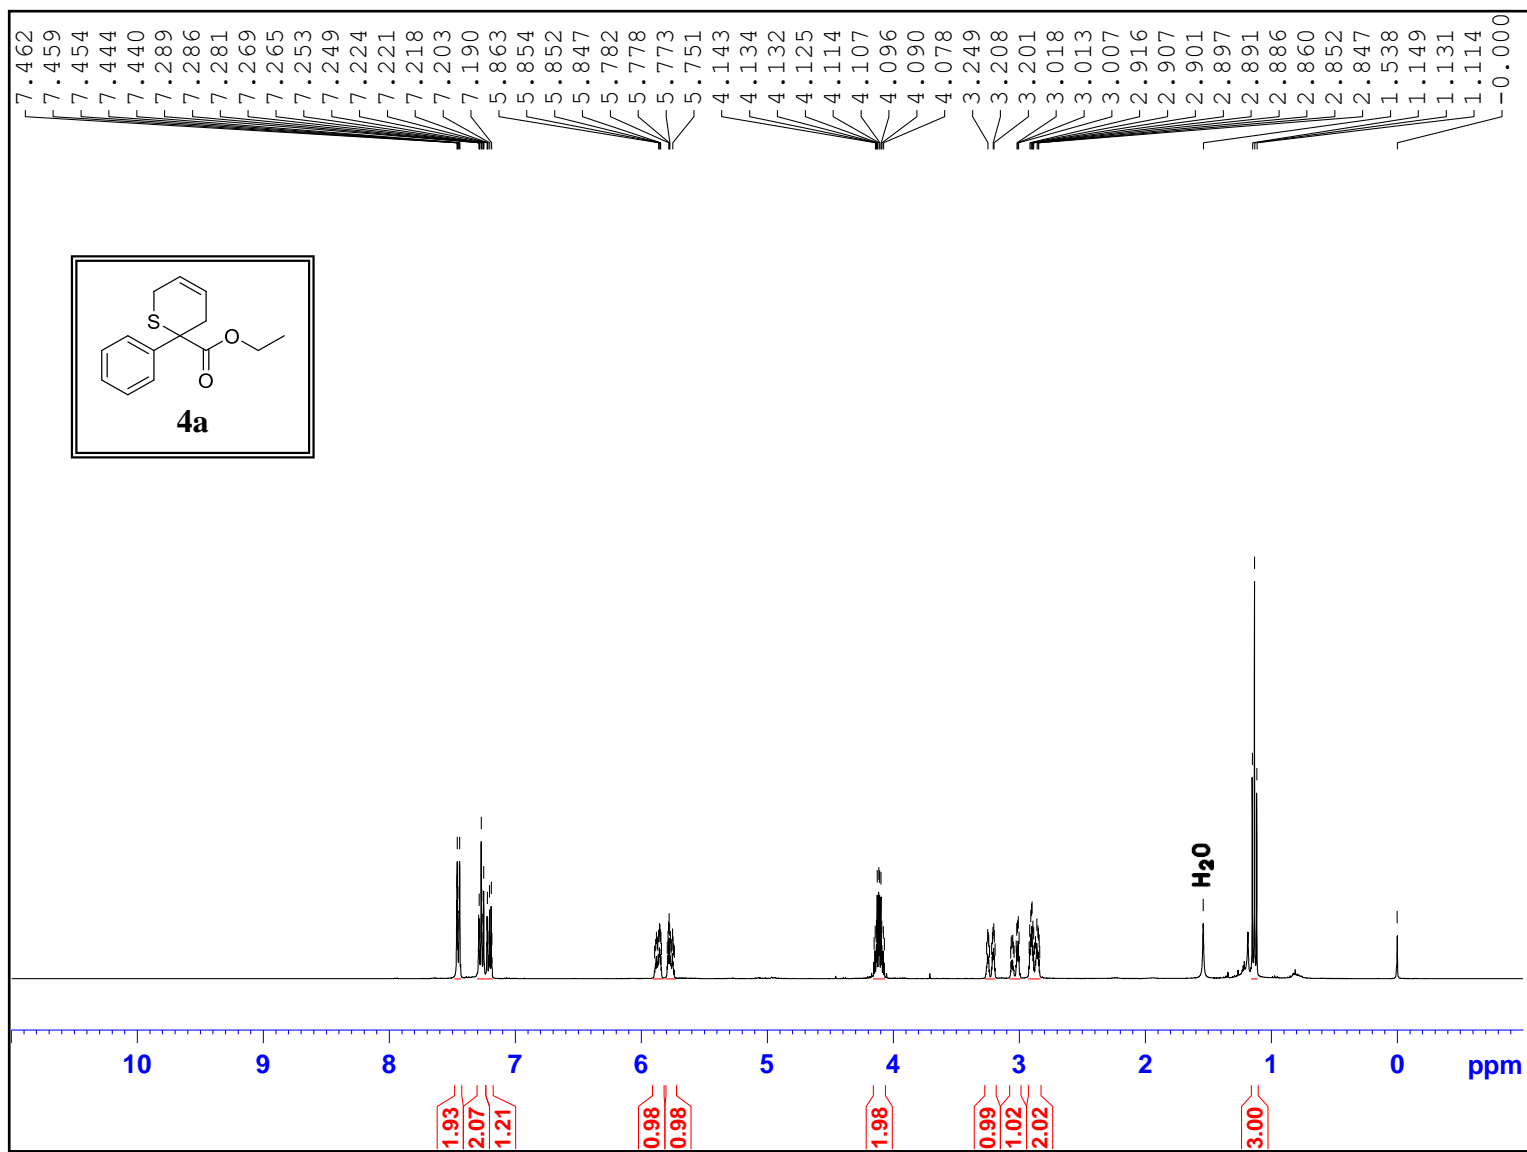

$^{13}\text{C}\{^1\text{H}\}$  NMR for compound **4a** (101 MHz,  $\text{CDCl}_3$ )

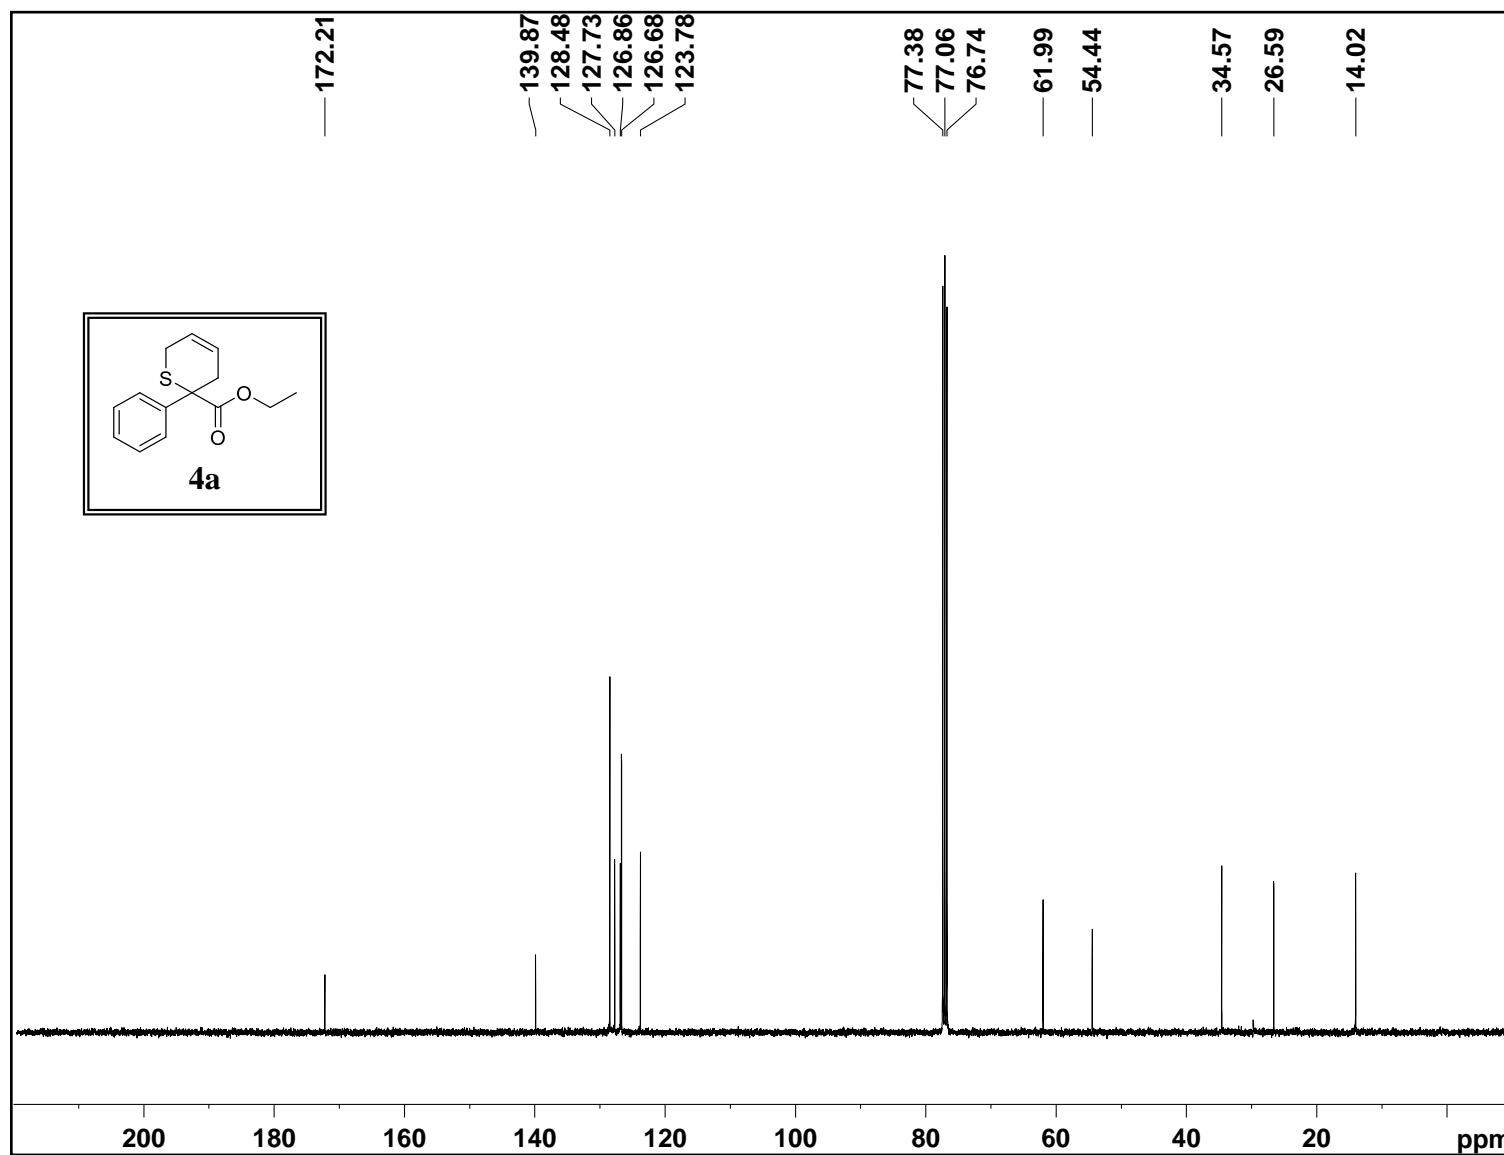



<sup>1</sup>H NMR for compound **4b** (400 MHz, CDCl<sub>3</sub>) (data)

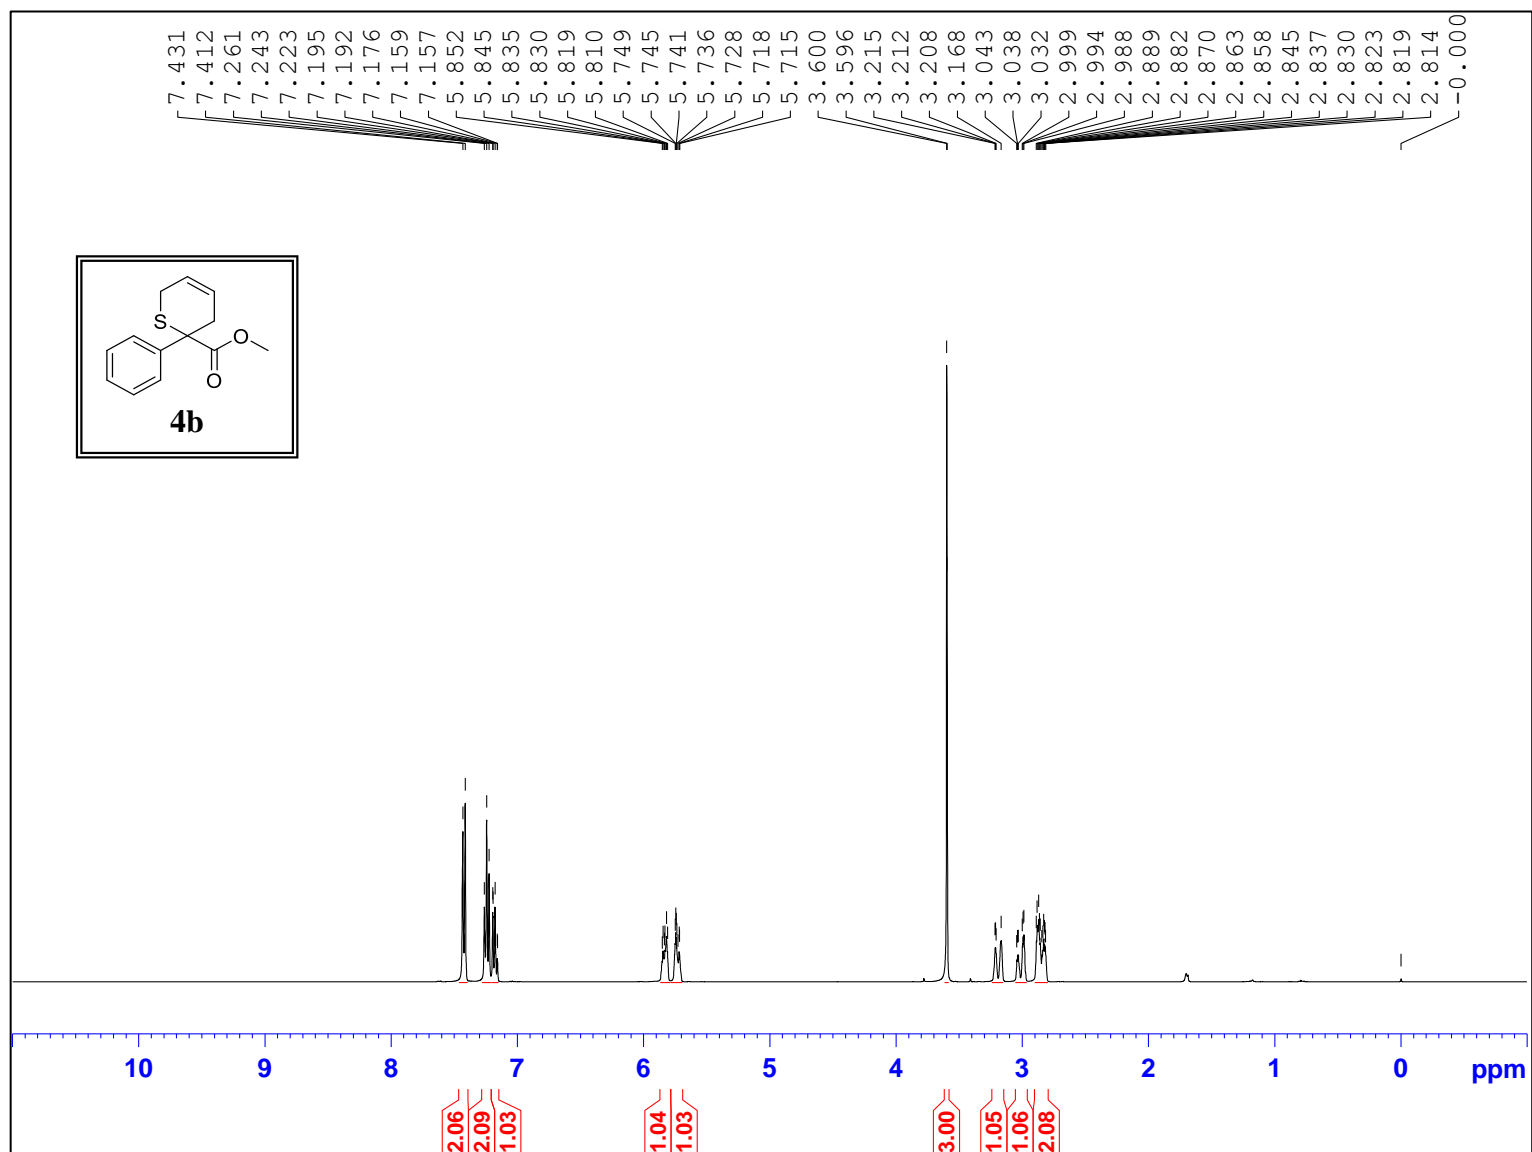

$^{13}\text{C}\{^1\text{H}\}$  NMR for compound **4b** (101 MHz,  $\text{CDCl}_3$ )

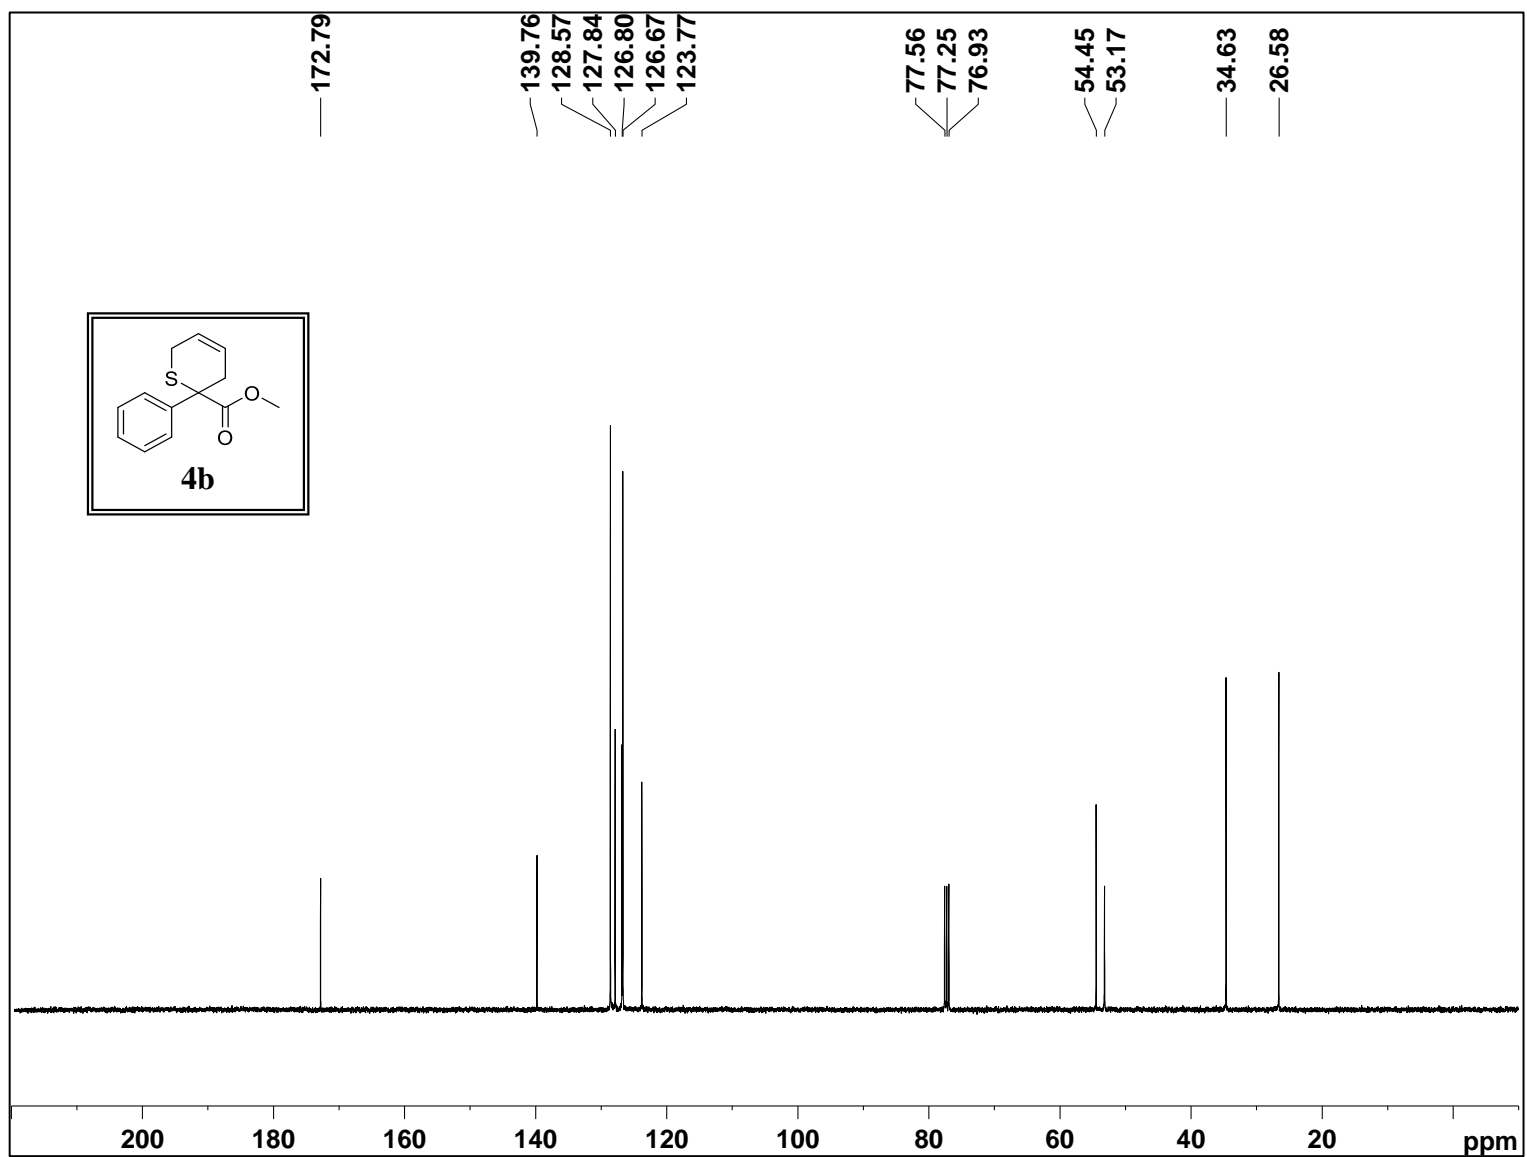

<sup>1</sup>H NMR for compound **4c** (400 MHz, CDCl<sub>3</sub>)

(data)

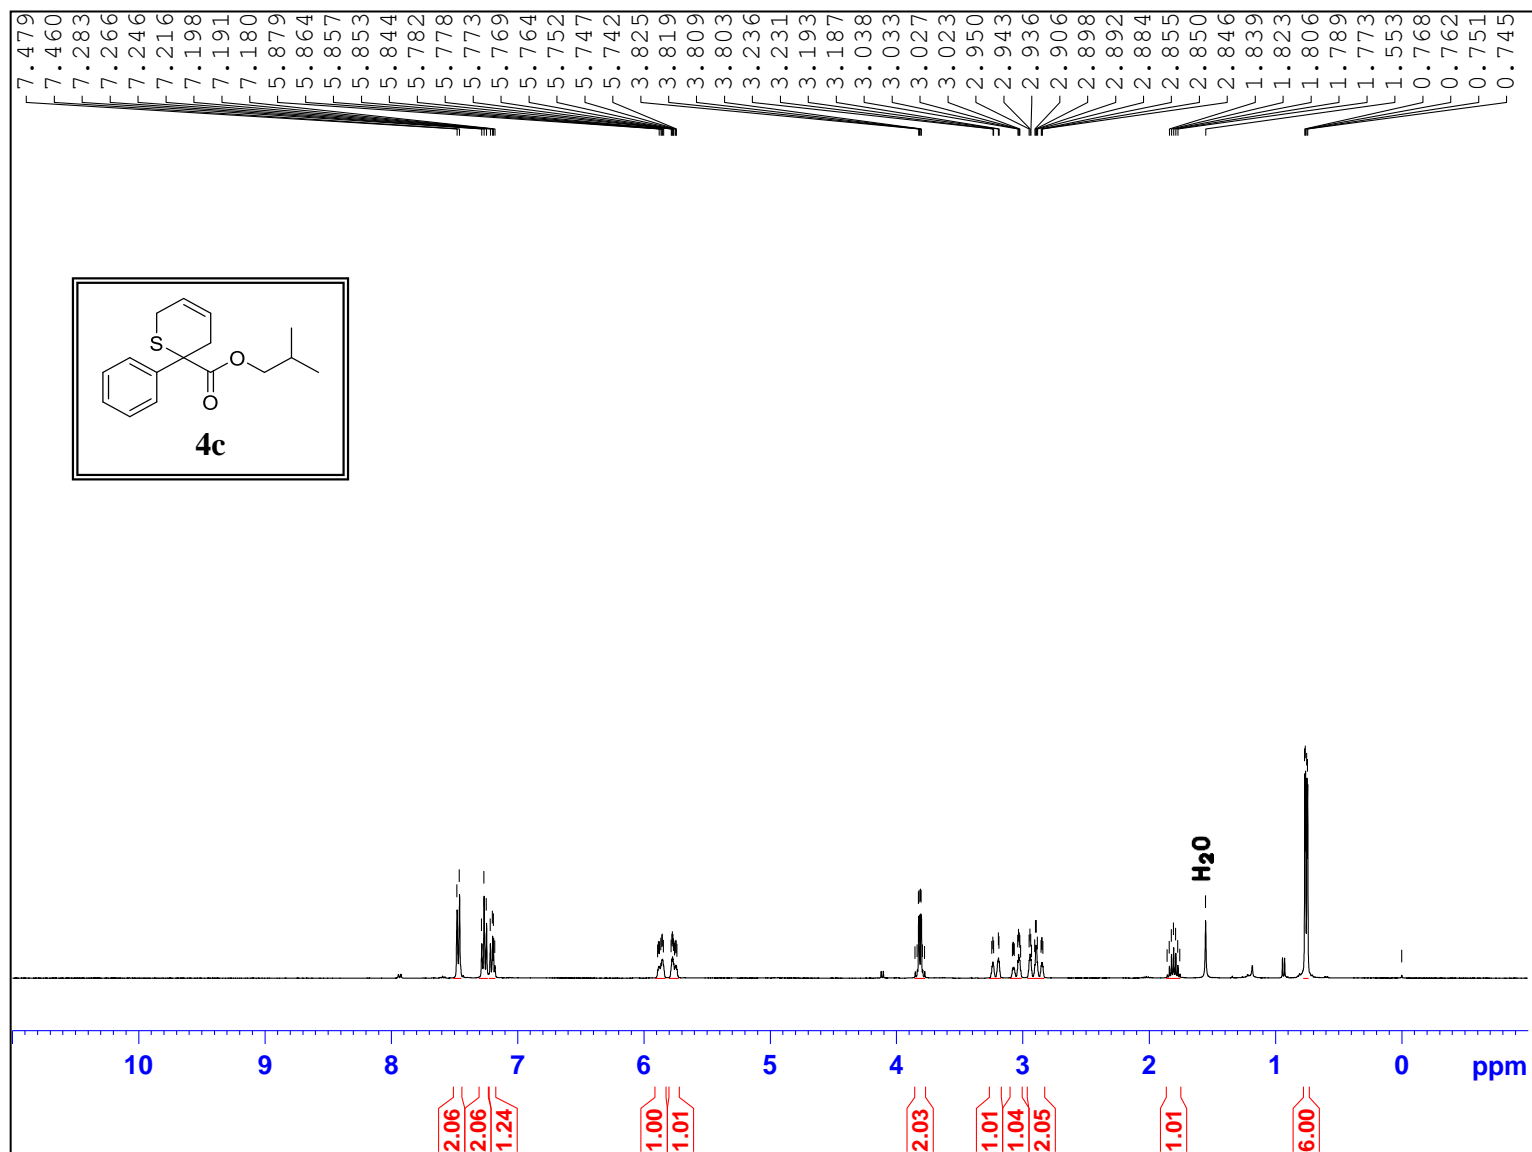

$^{13}\text{C}\{^1\text{H}\}$  NMR for compound **4c** (101 MHz,  $\text{CDCl}_3$ )

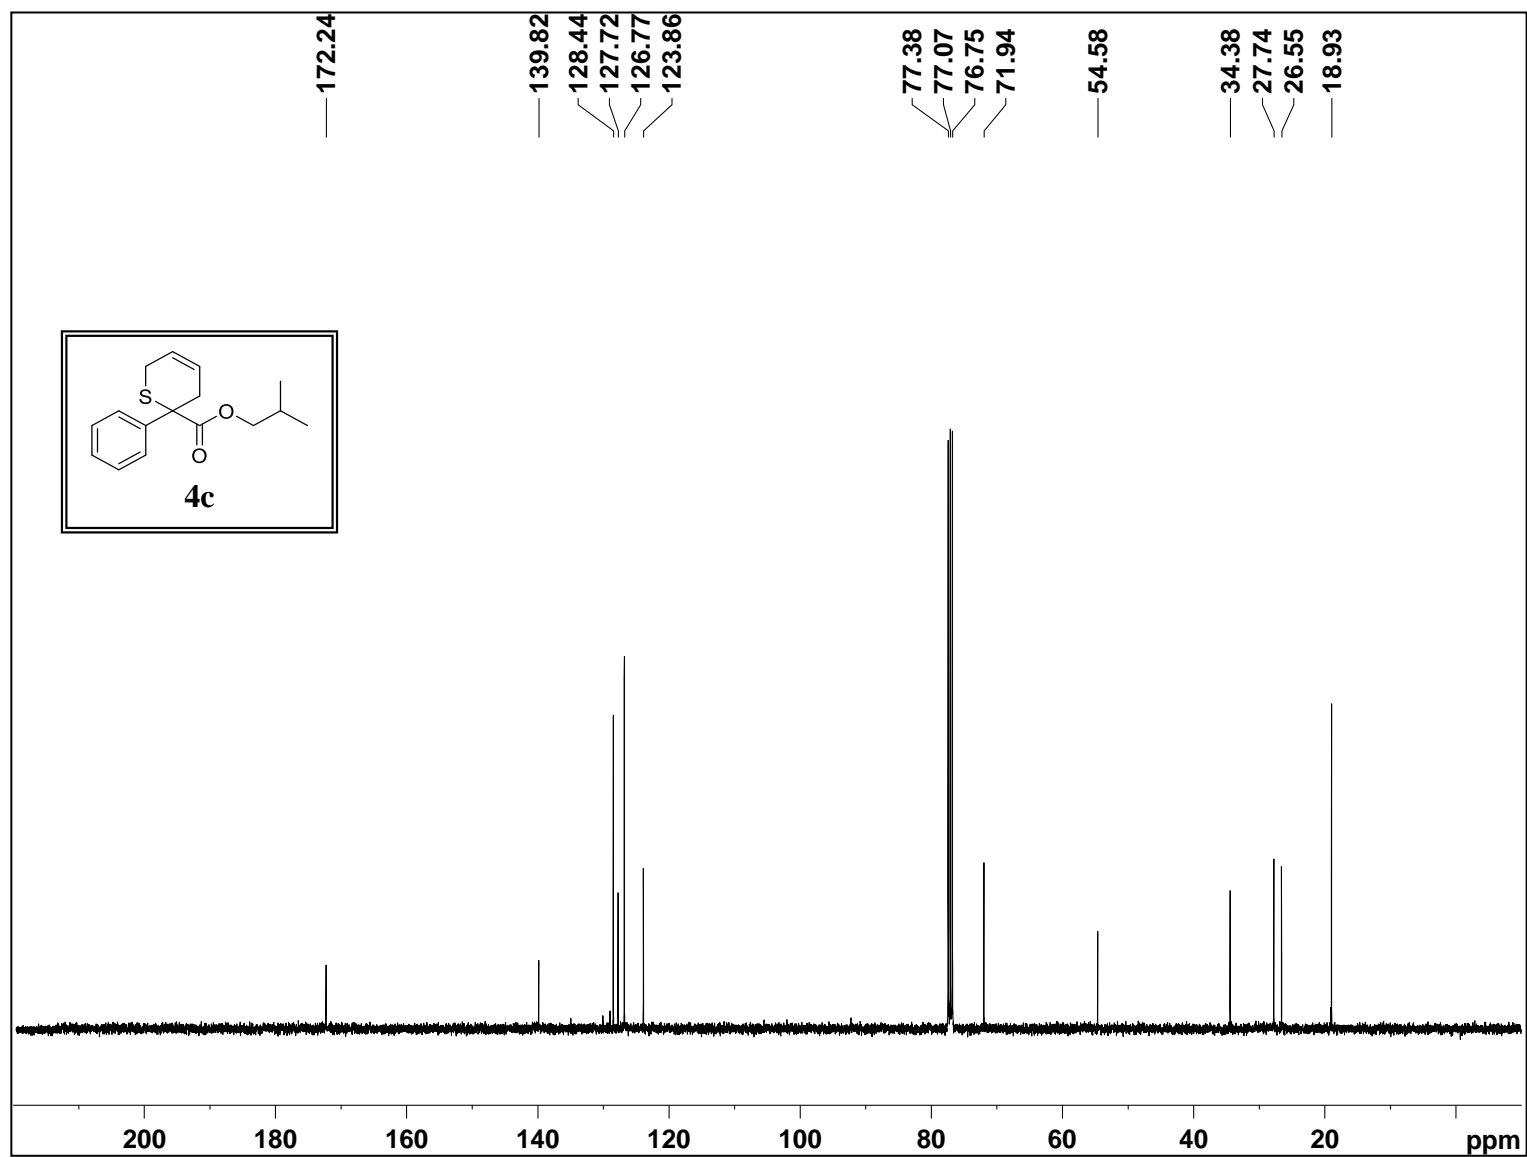

$^{13}\text{C}\{^1\text{H}\}$  DEPT-135 NMR for compound **4c** (101 MHz,  $\text{CDCl}_3$ )

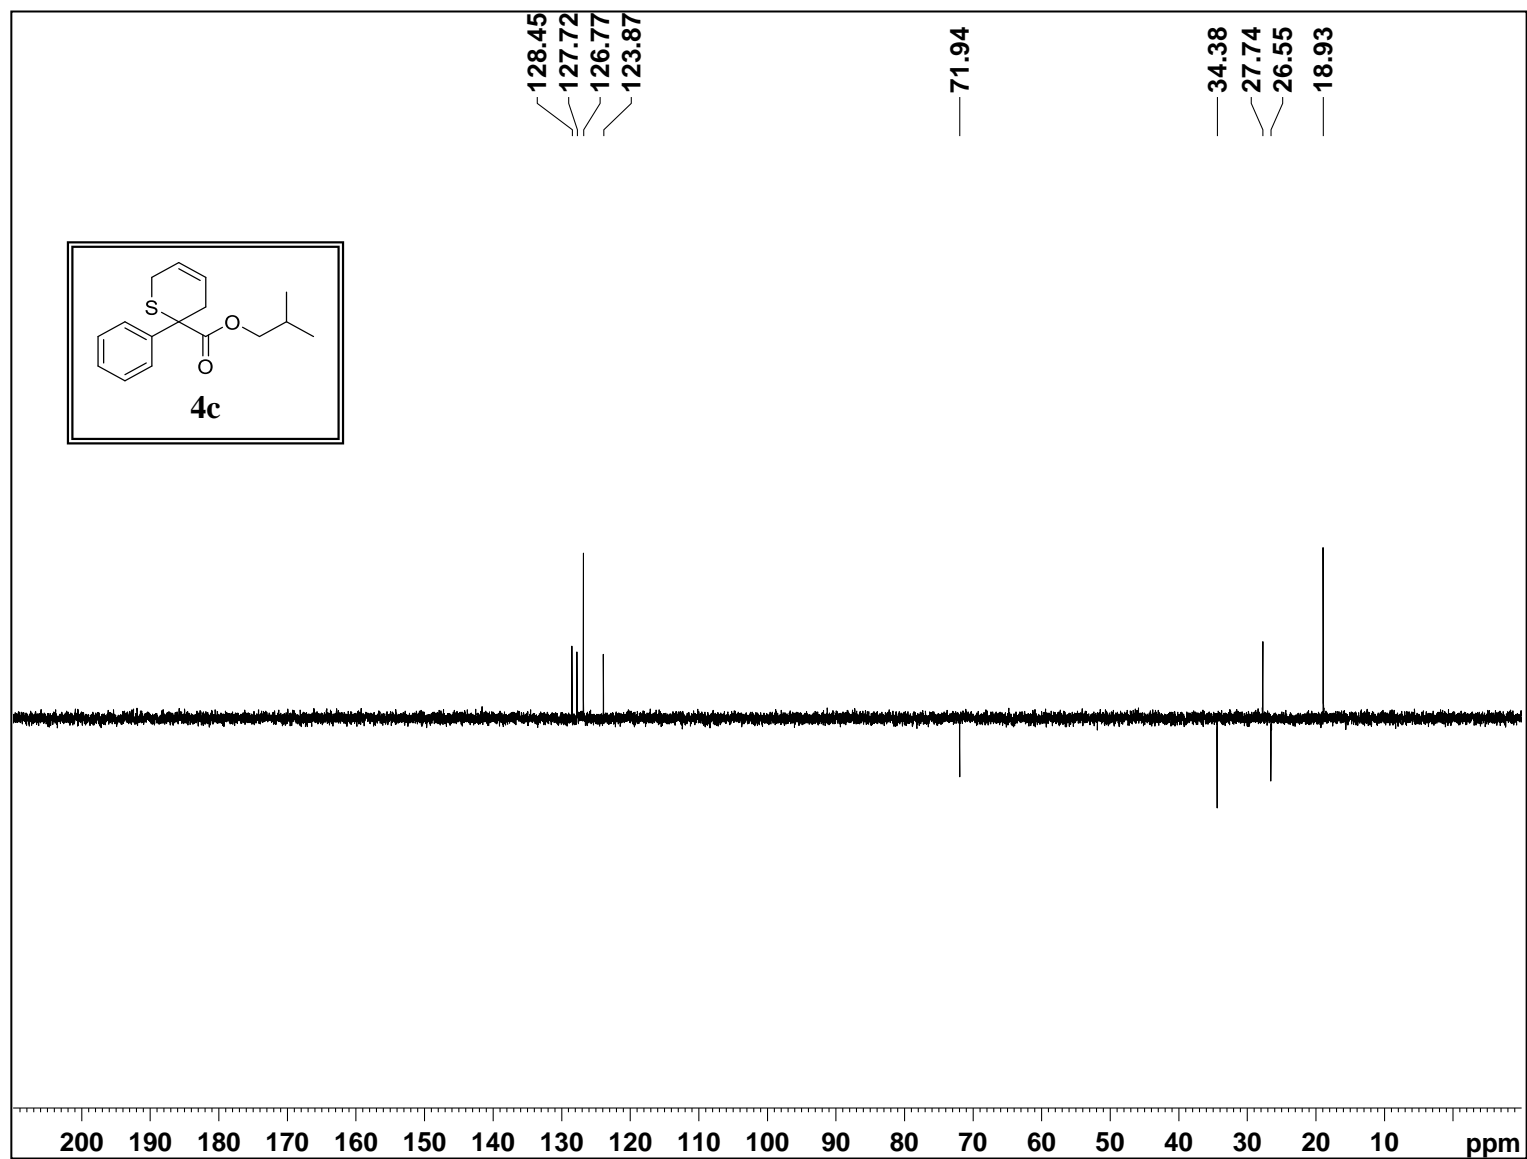

<sup>1</sup>H NMR for compound **4d** (400 MHz, CDCl<sub>3</sub>)

(data)

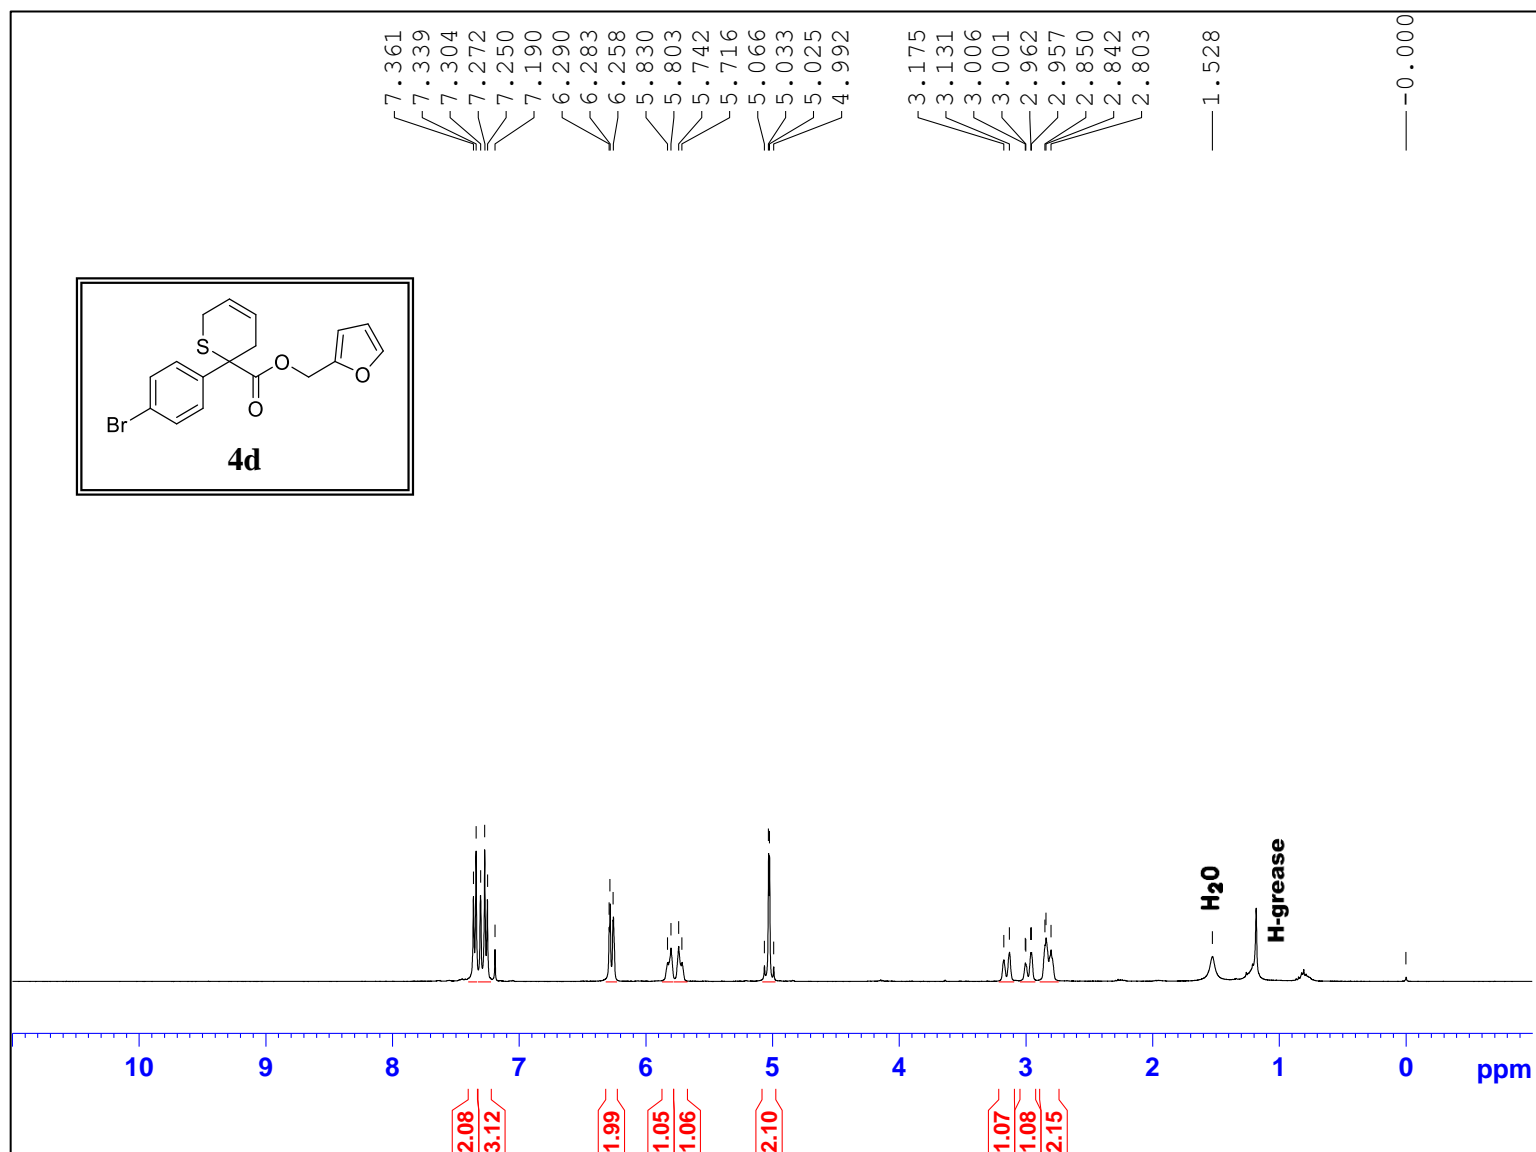

$^{13}\text{C}\{^1\text{H}\}$  NMR for compound **4d** (101 MHz,  $\text{CDCl}_3$ )

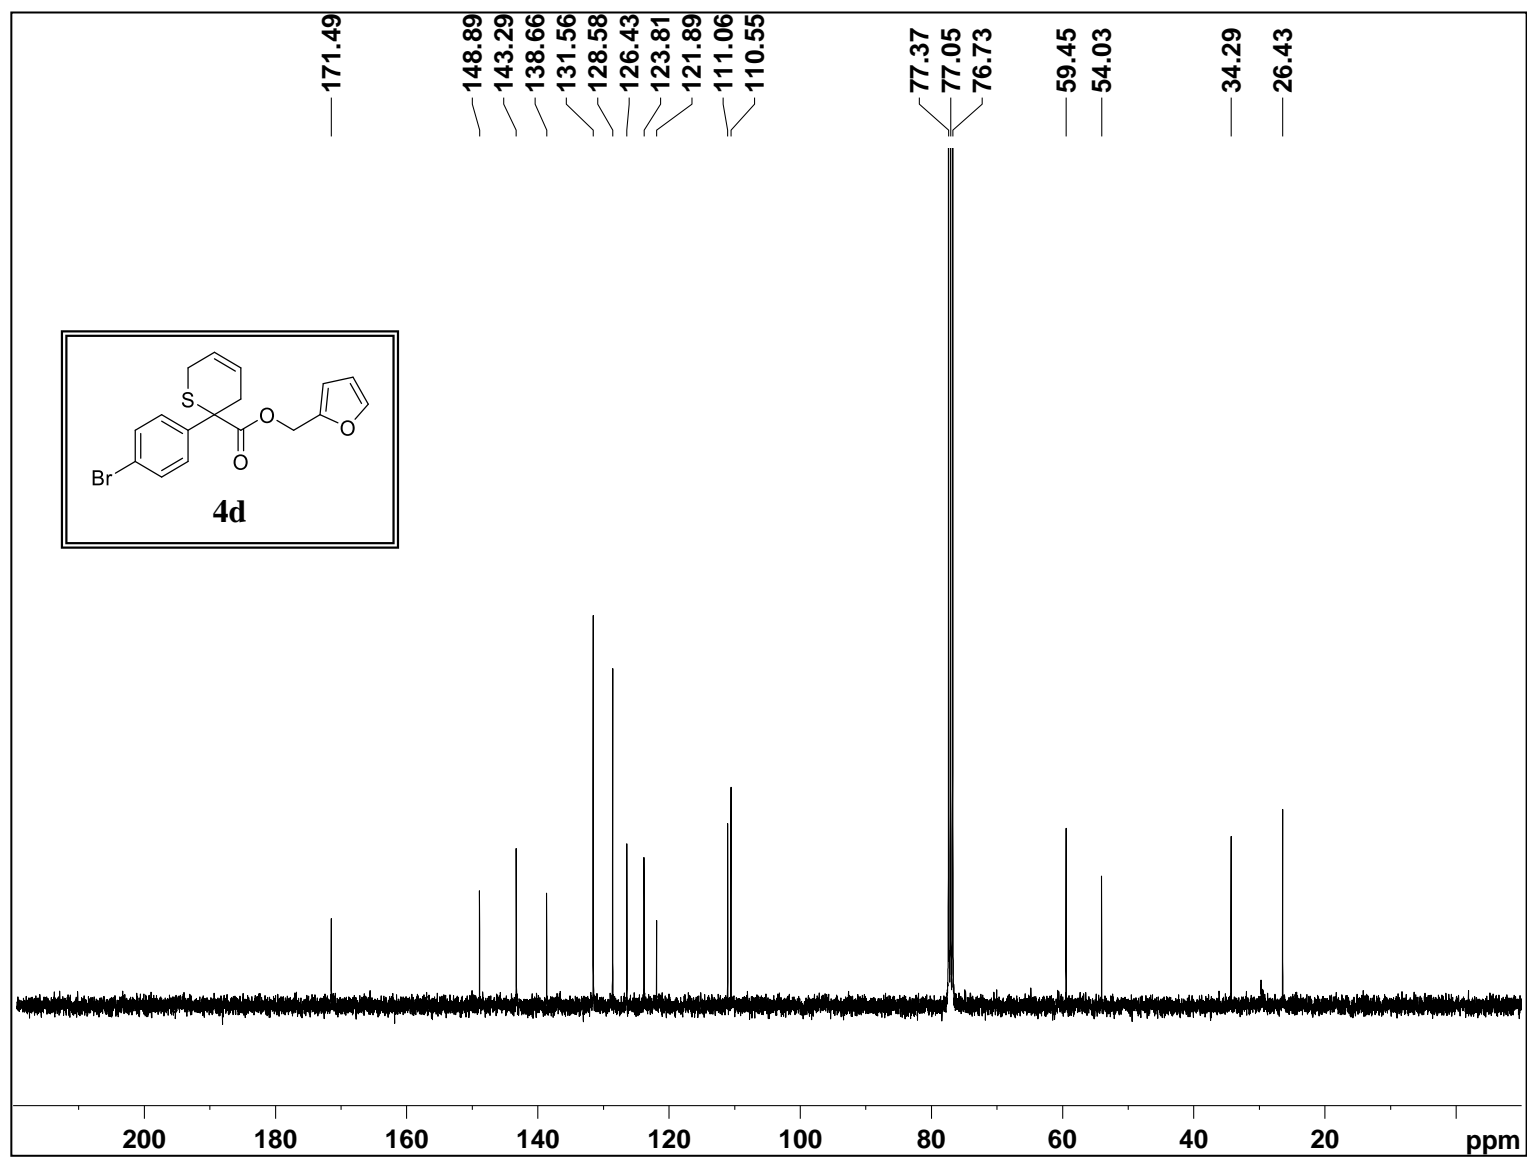

<sup>1</sup>H NMR for compound **4e** (400 MHz, CDCl<sub>3</sub>)

(data)

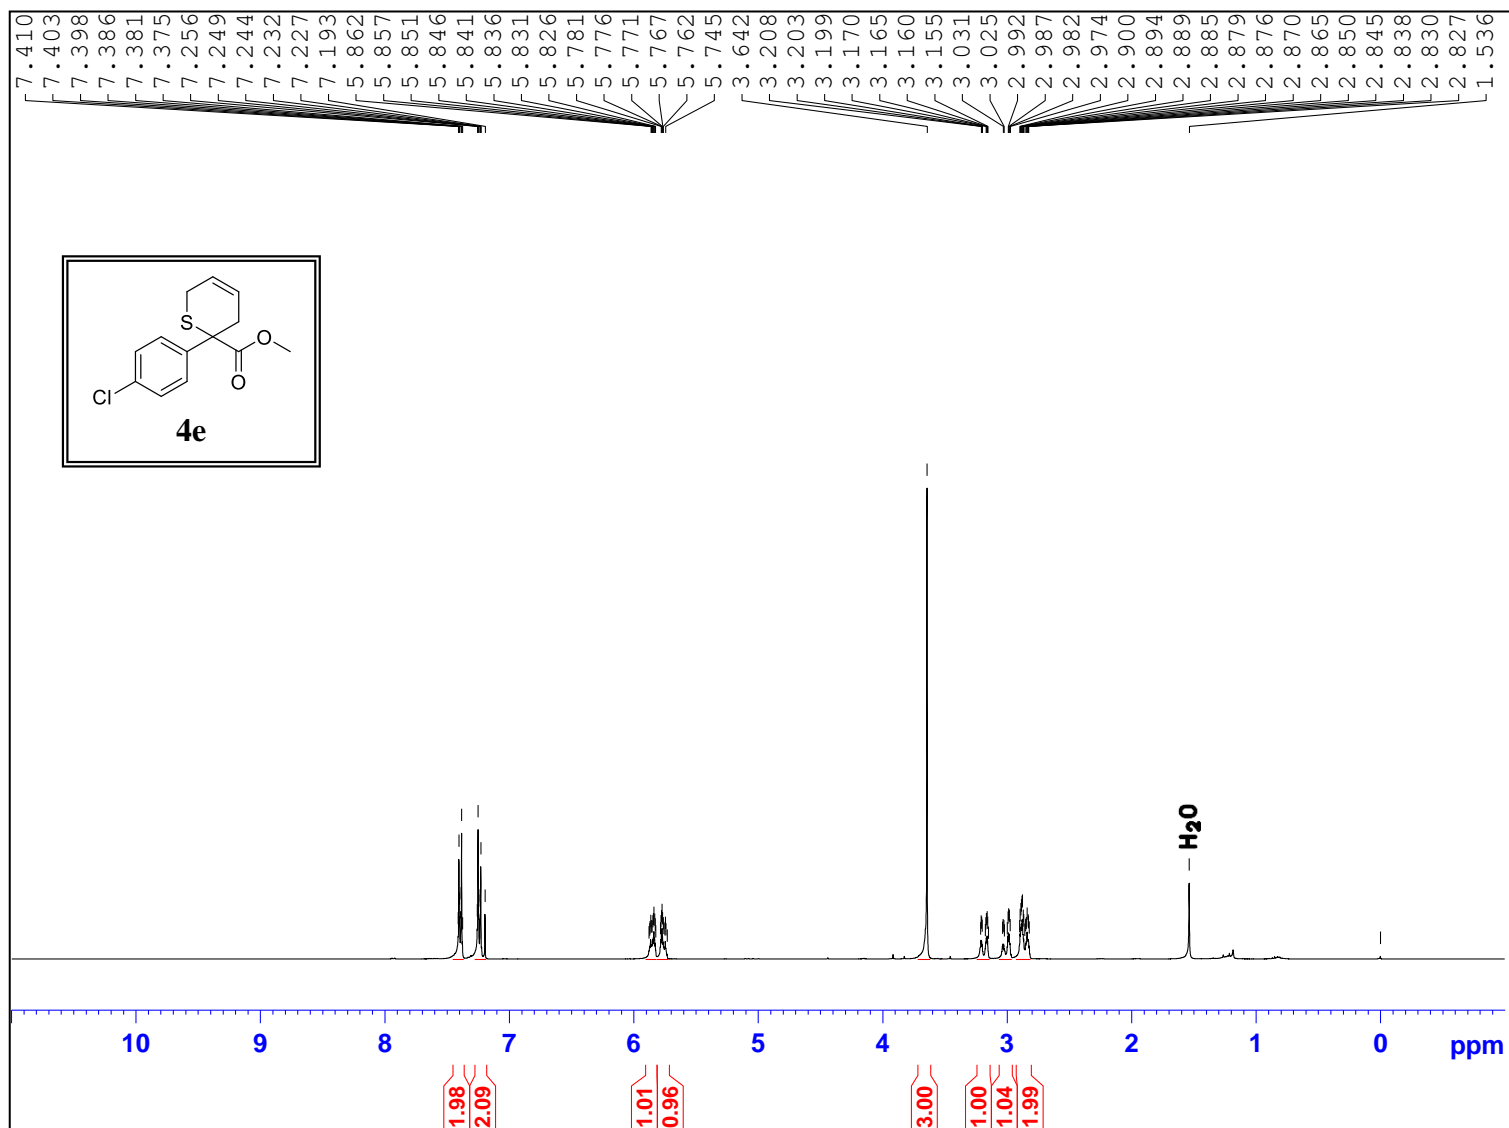



$^{13}\text{C}\{^1\text{H}\}$  NMR for compound **4e** (101 MHz,  $\text{CDCl}_3$ )

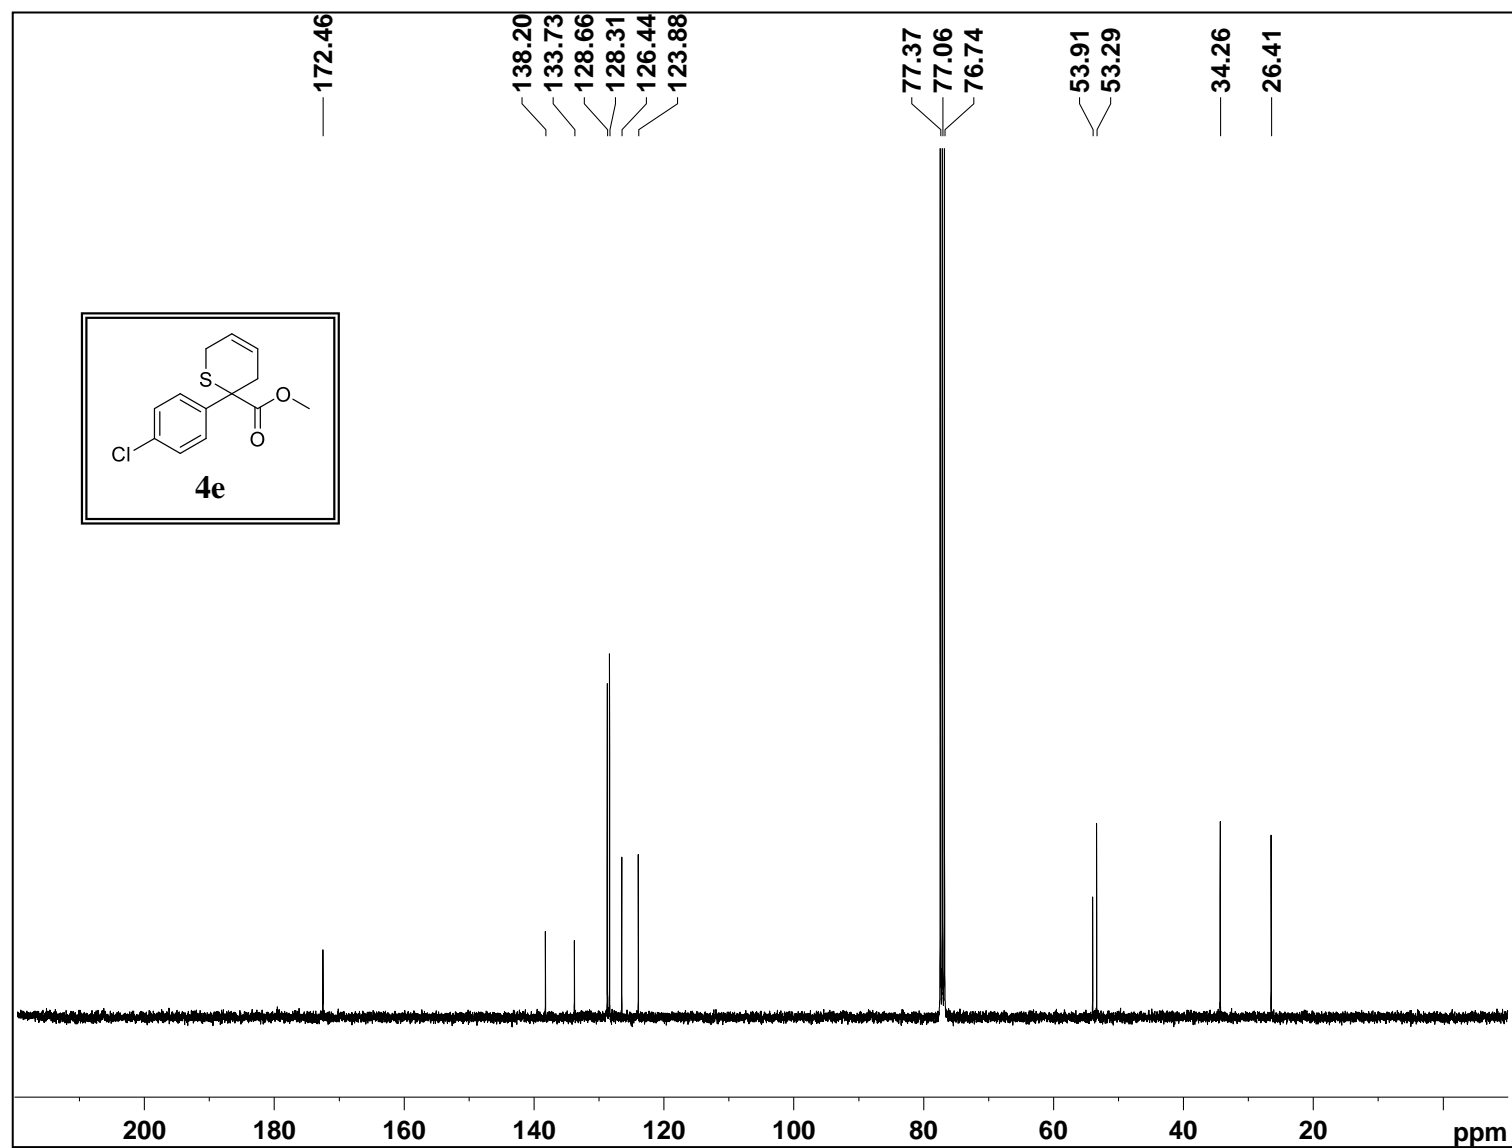

<sup>1</sup>H NMR for compound **4f** (400 MHz, CDCl<sub>3</sub>)

(data)

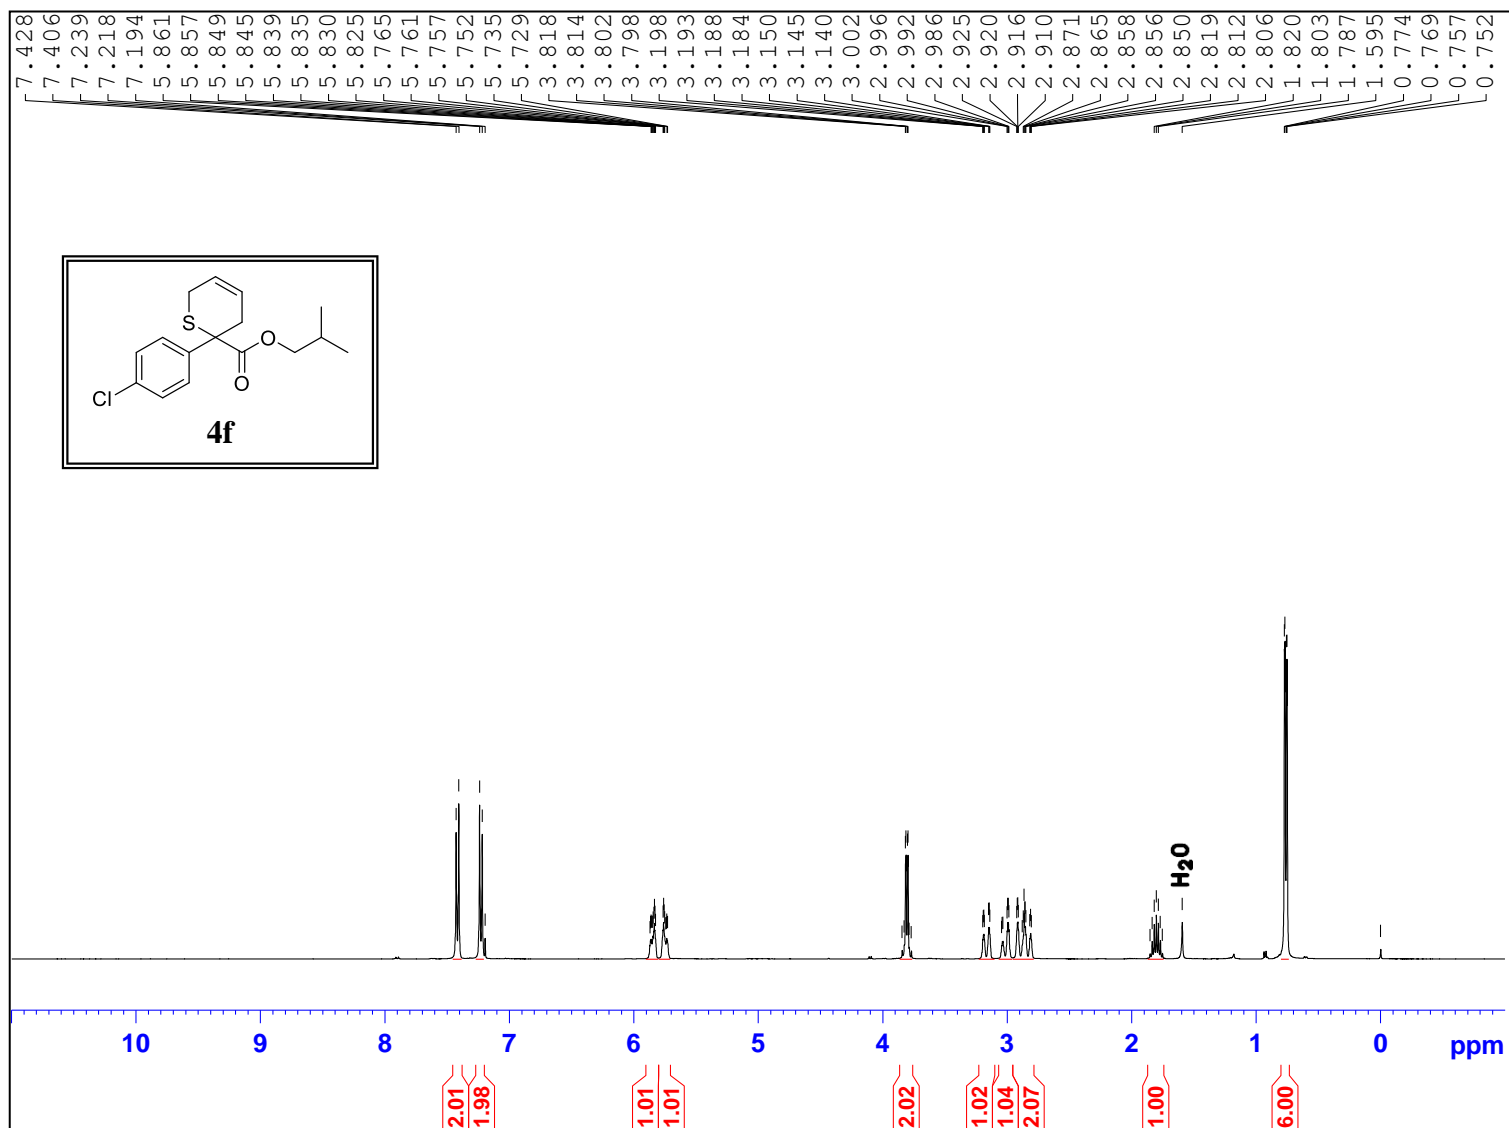

$^{13}\text{C}\{^1\text{H}\}$  NMR for compound **4f** (101 MHz,  $\text{CDCl}_3$ )

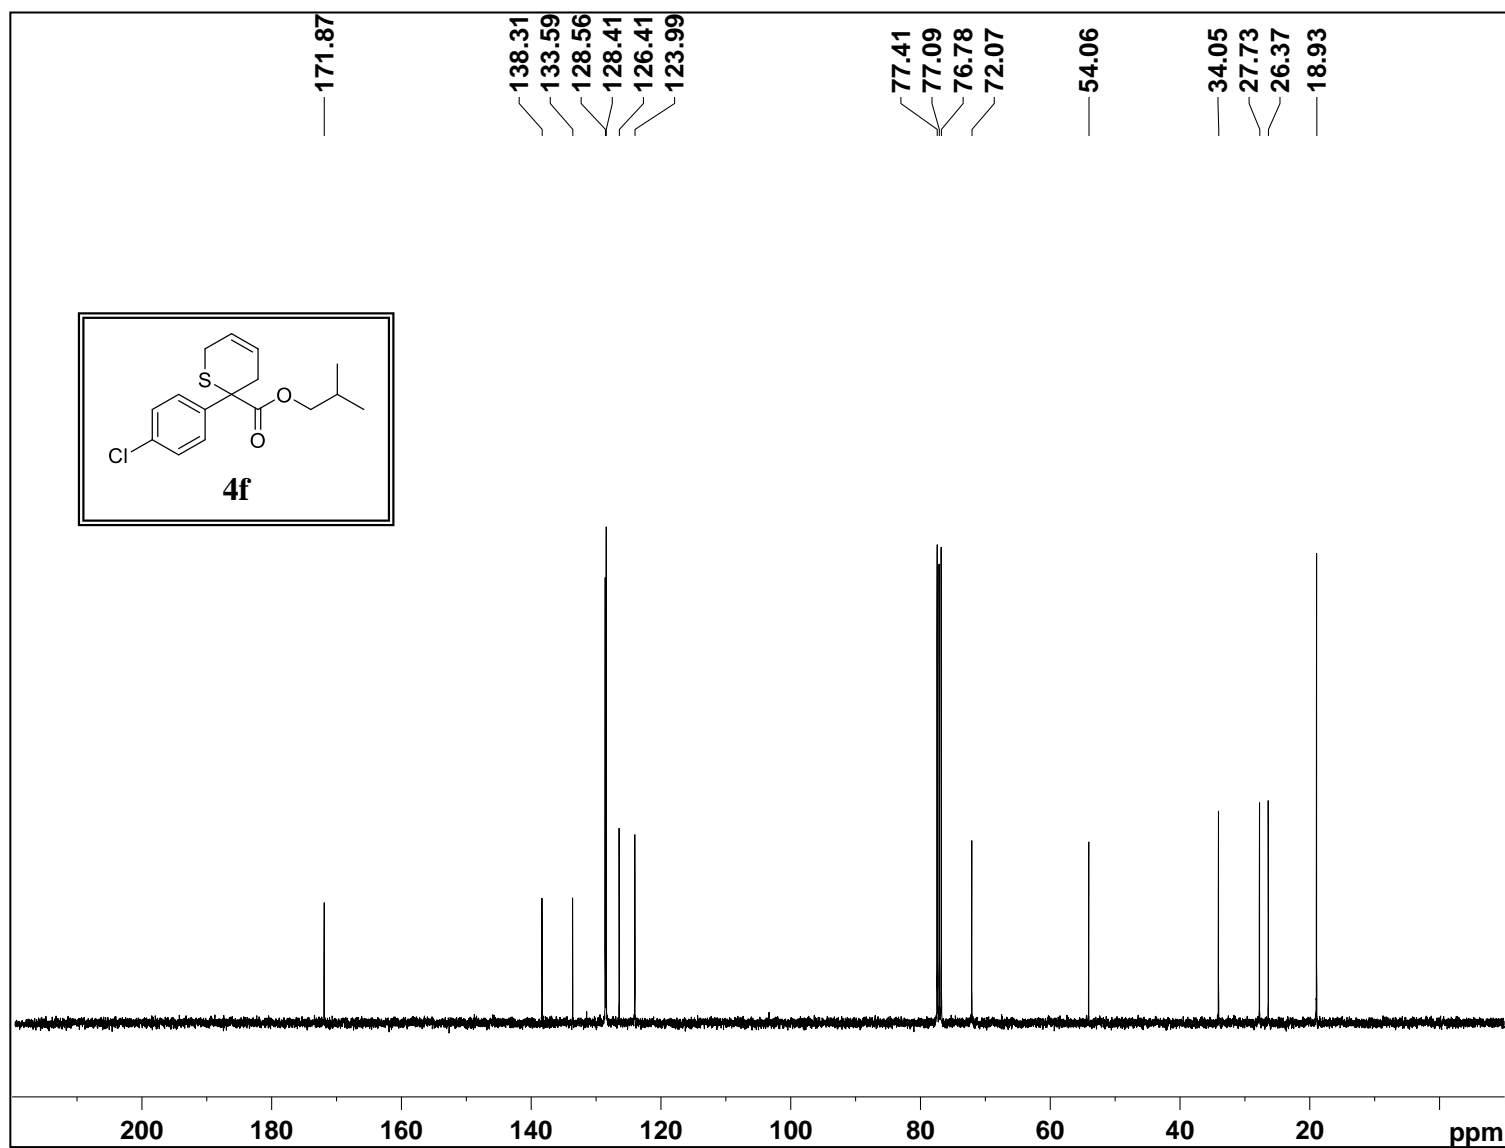

<sup>1</sup>H NMR for compound **4g** (400 MHz, CDCl<sub>3</sub>) (data)

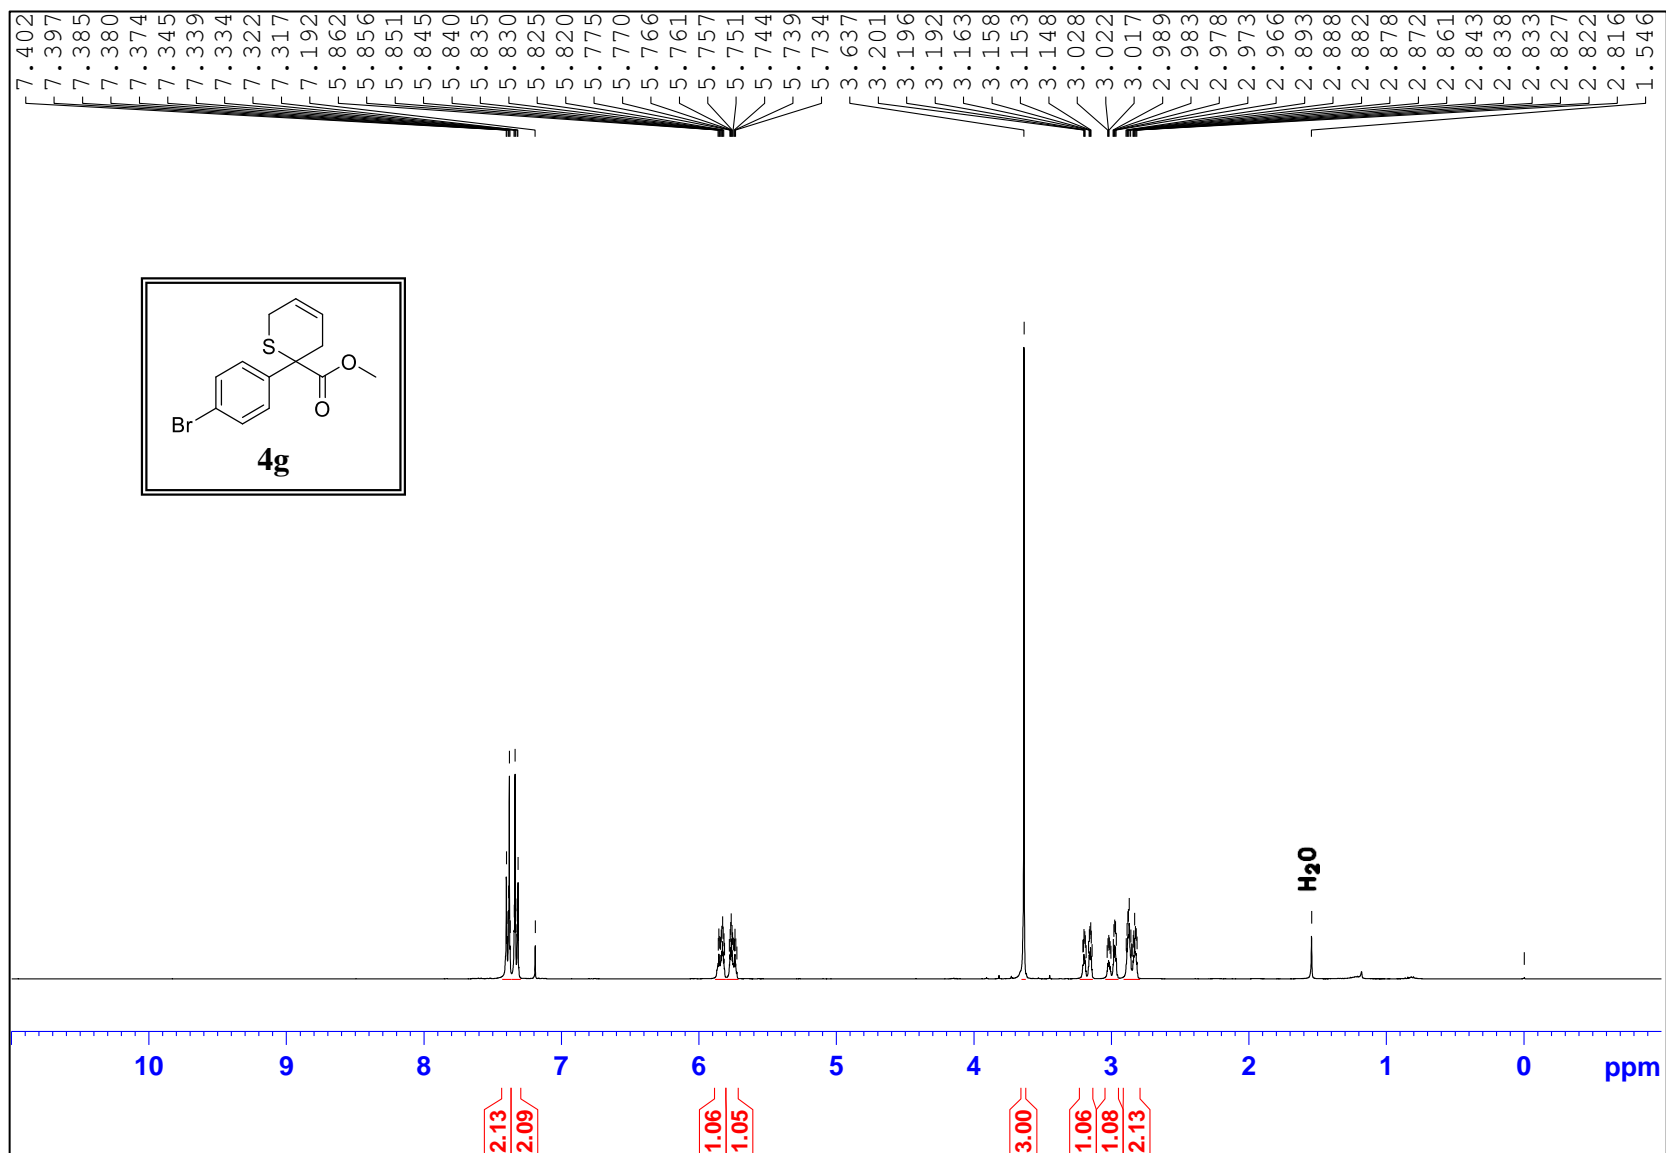

$^{13}\text{C}\{^1\text{H}\}$  NMR for compound **4g** (101 MHz,  $\text{CDCl}_3$ )

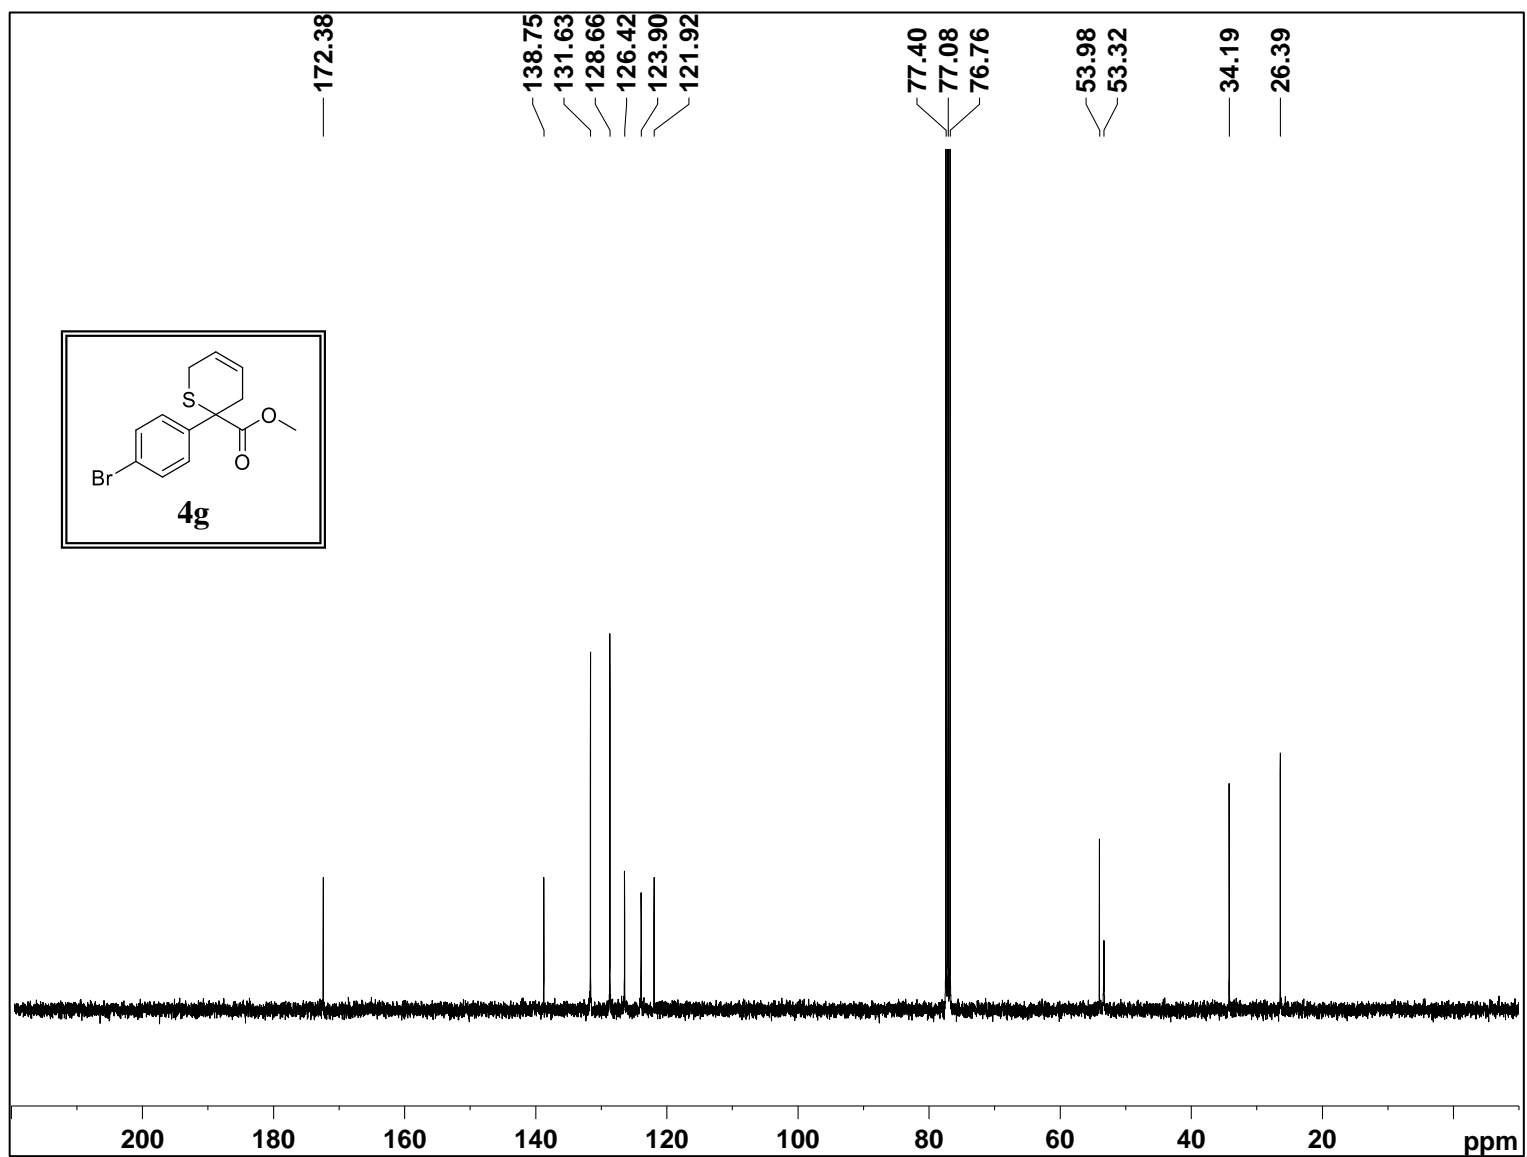

<sup>1</sup>H NMR for compound **4h** (400 MHz, CDCl<sub>3</sub>) (data)

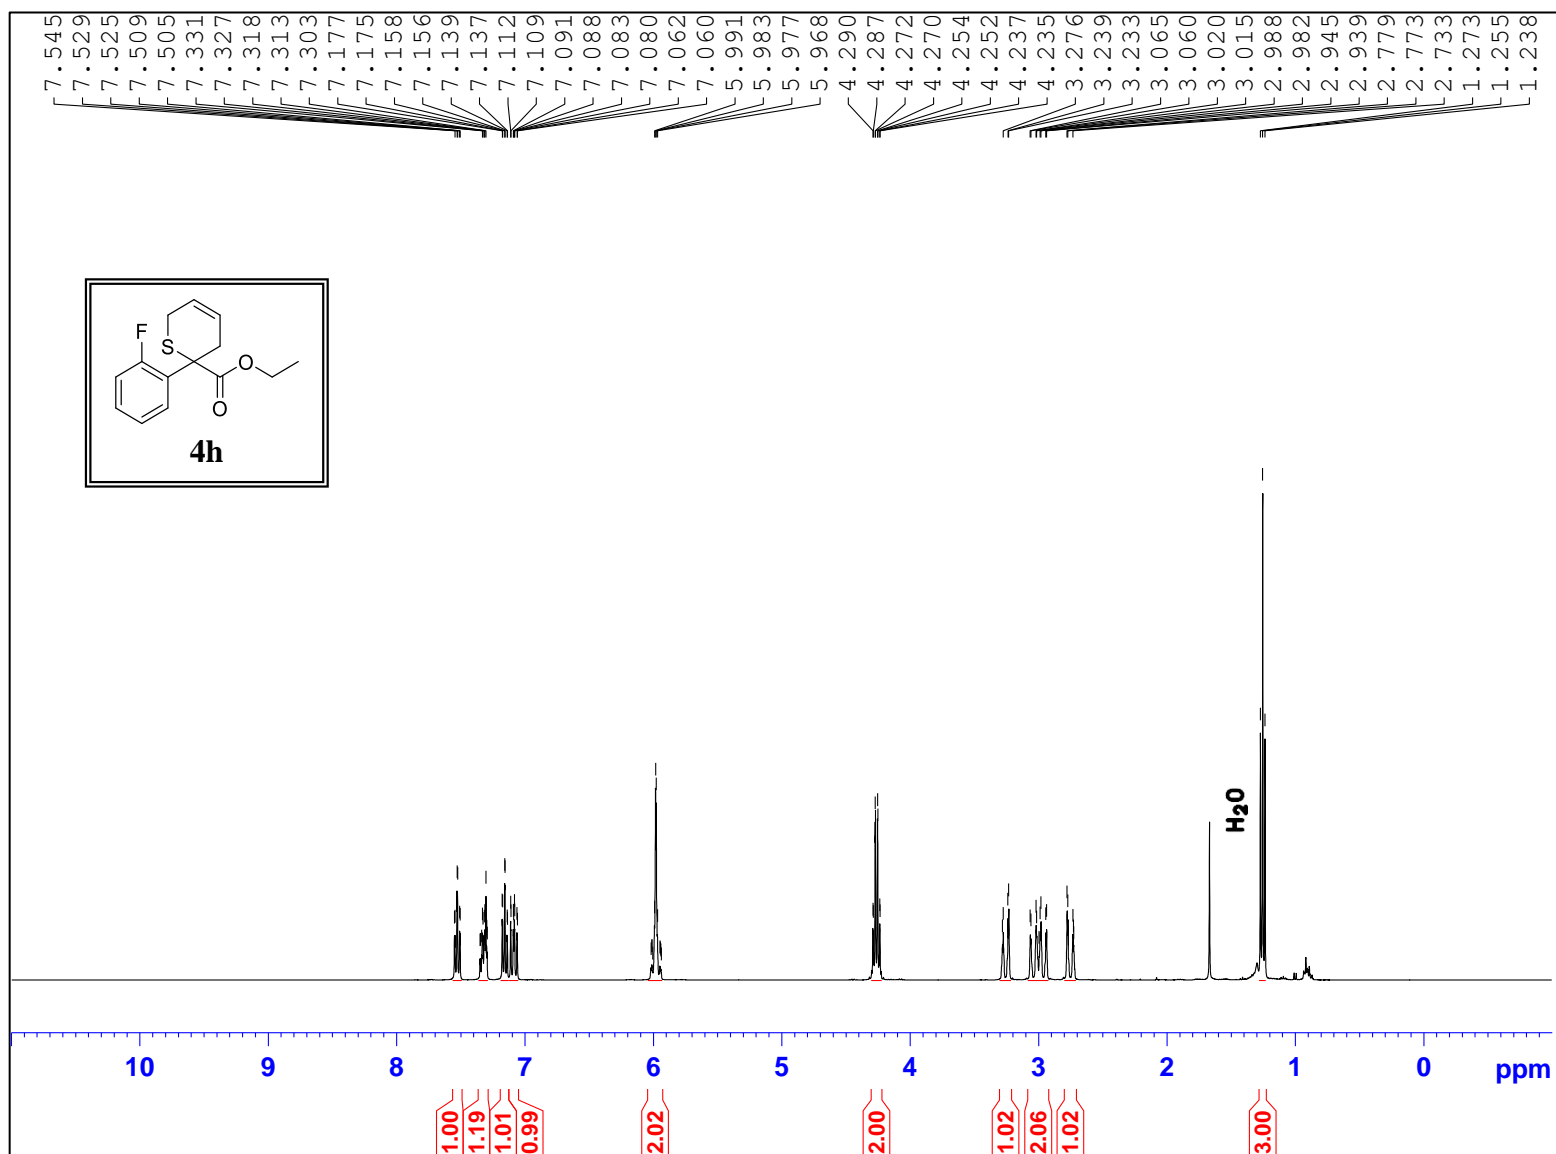

$^{13}\text{C}\{^1\text{H}\}$  NMR for compound **4h** (101 MHz,  $\text{CDCl}_3$ )

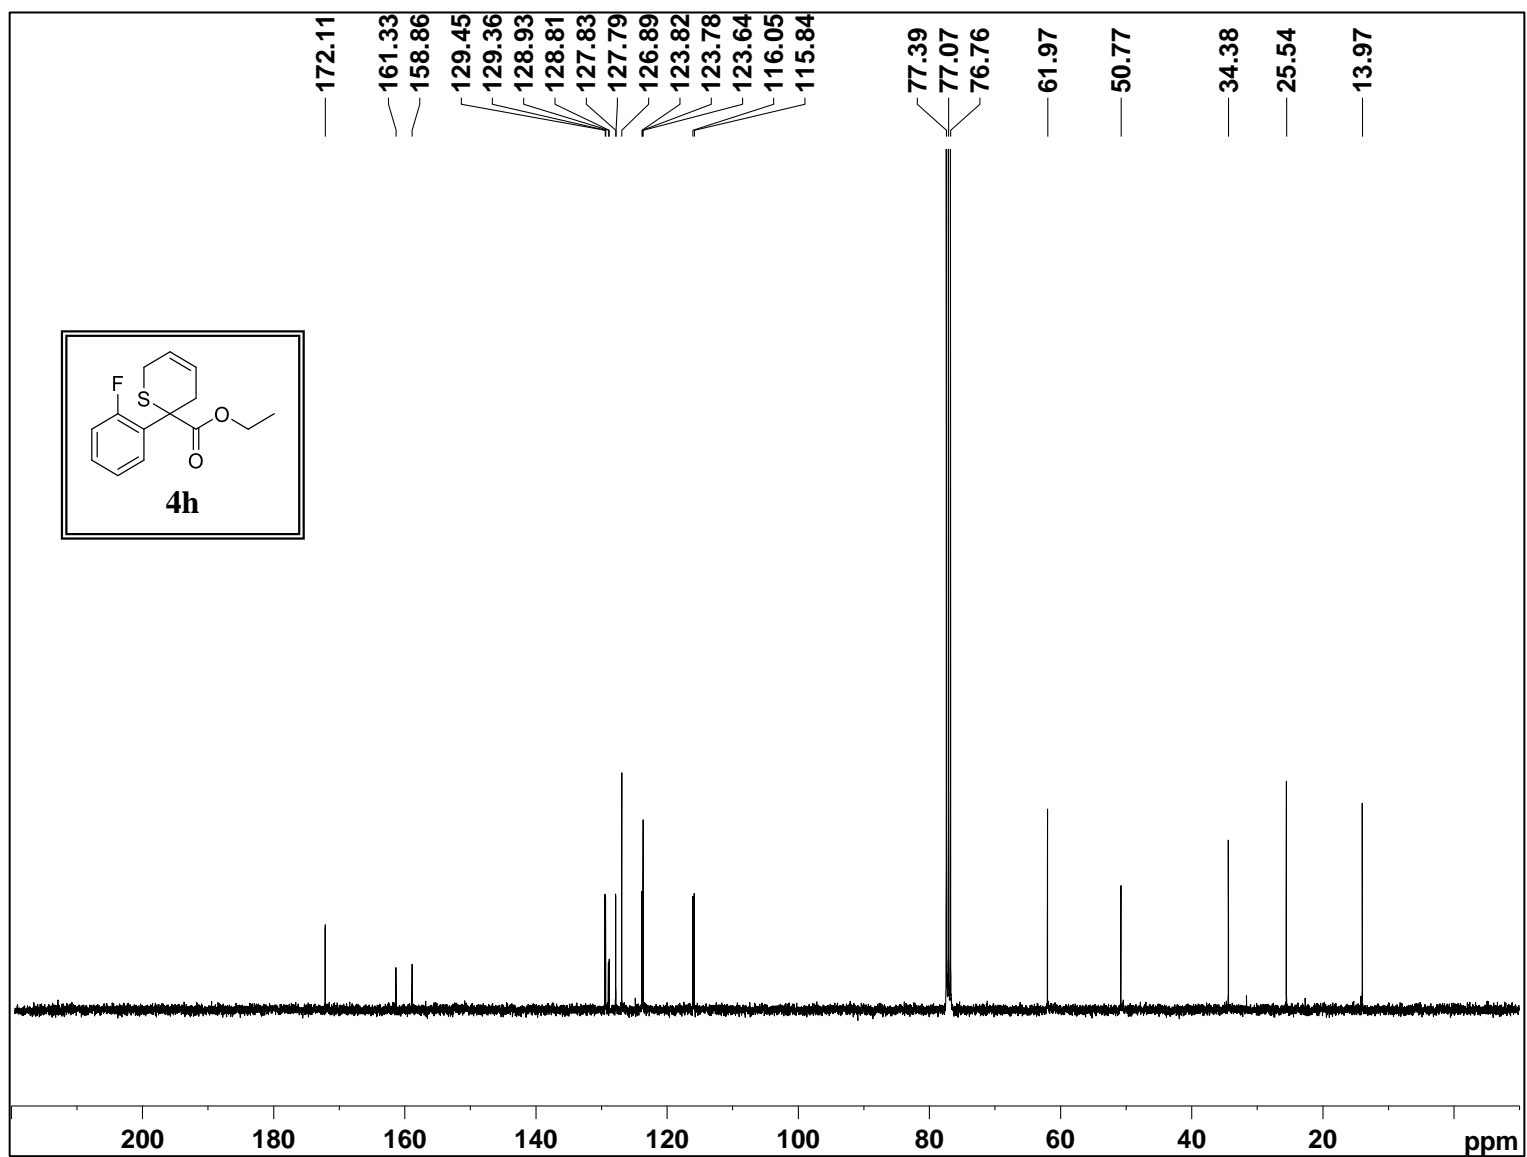

$^{13}\text{C}\{^1\text{H}\}$  DEPT-135 NMR for compound **4h** (101 MHz,  $\text{CDCl}_3$ )

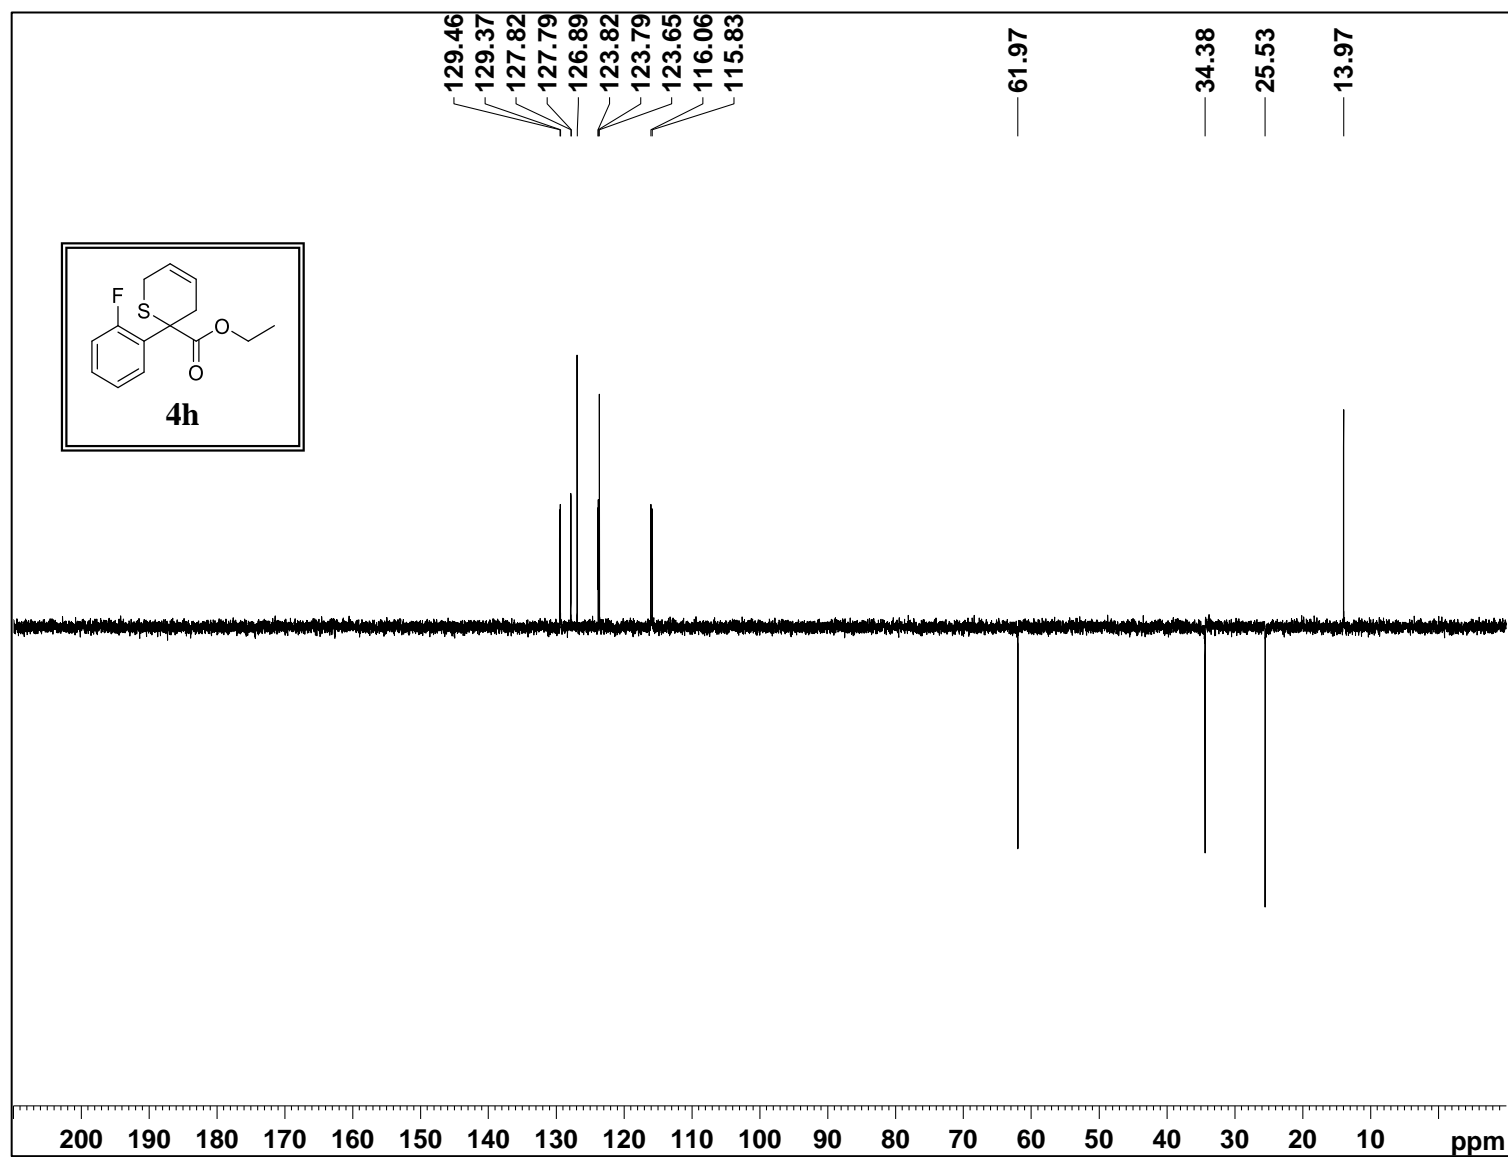



<sup>1</sup>H NMR for compound **4i** (400 MHz, CDCl<sub>3</sub>)

(data)

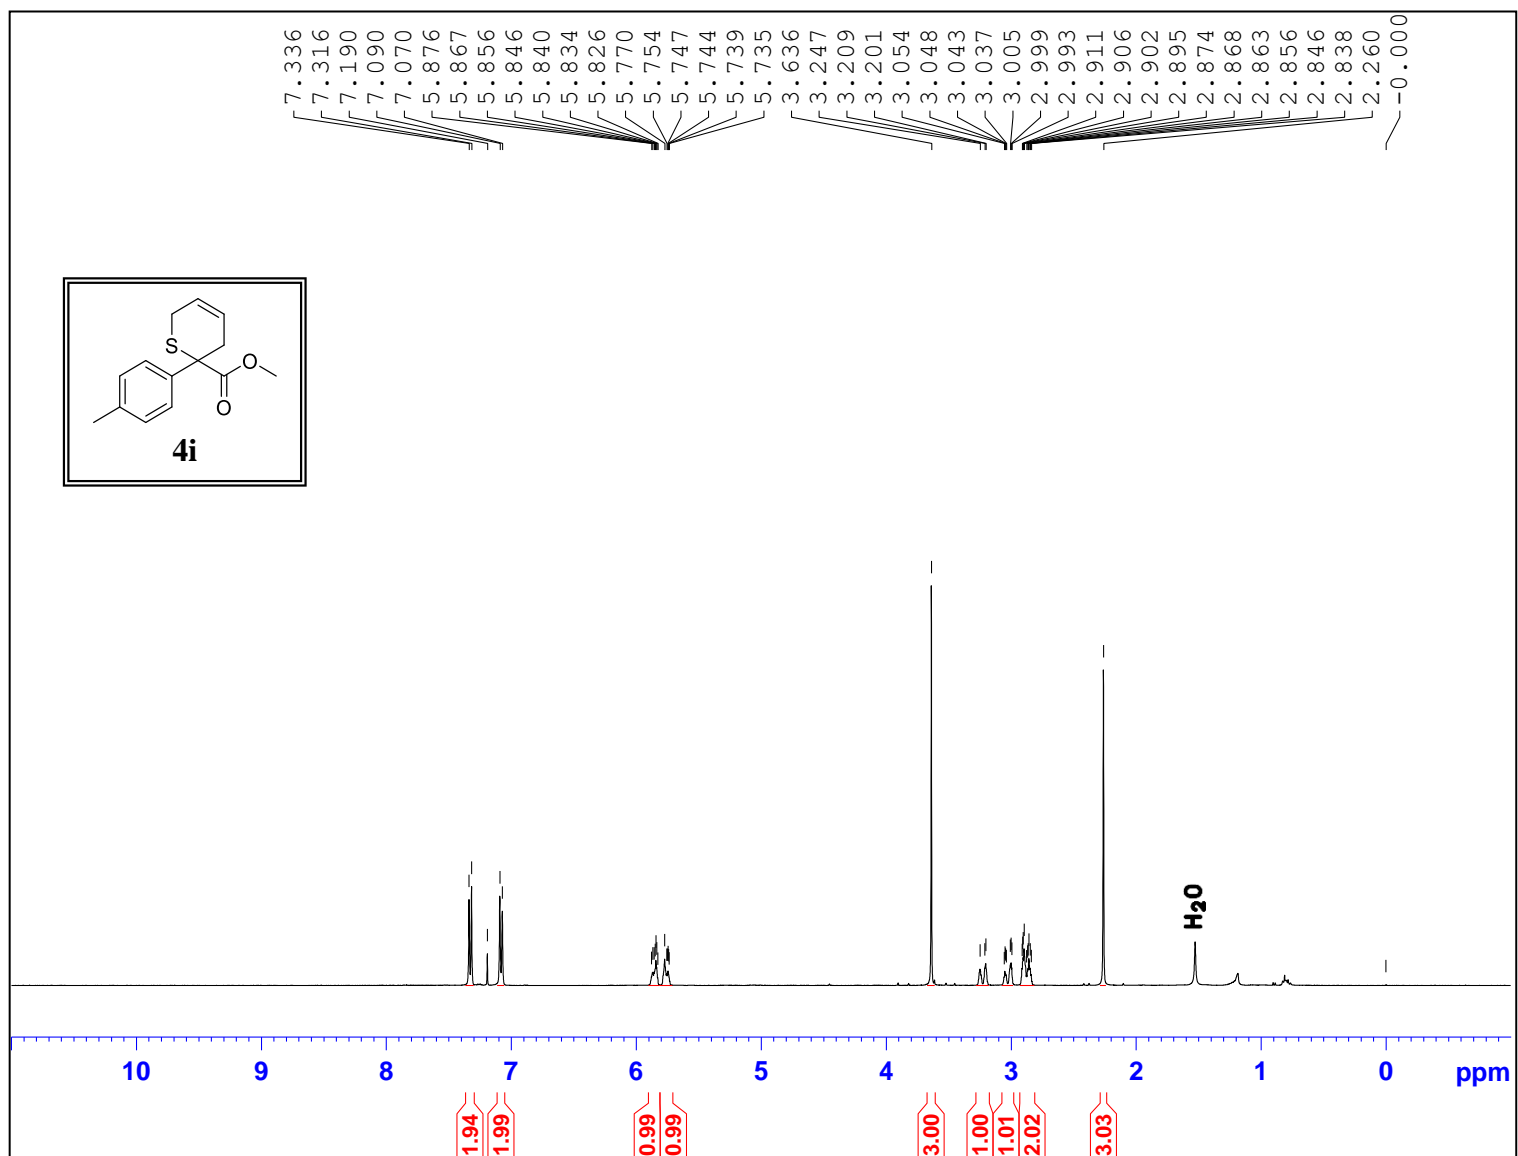

$^{13}\text{C}\{^1\text{H}\}$  NMR for compound **4i** (101 MHz,  $\text{CDCl}_3$ )

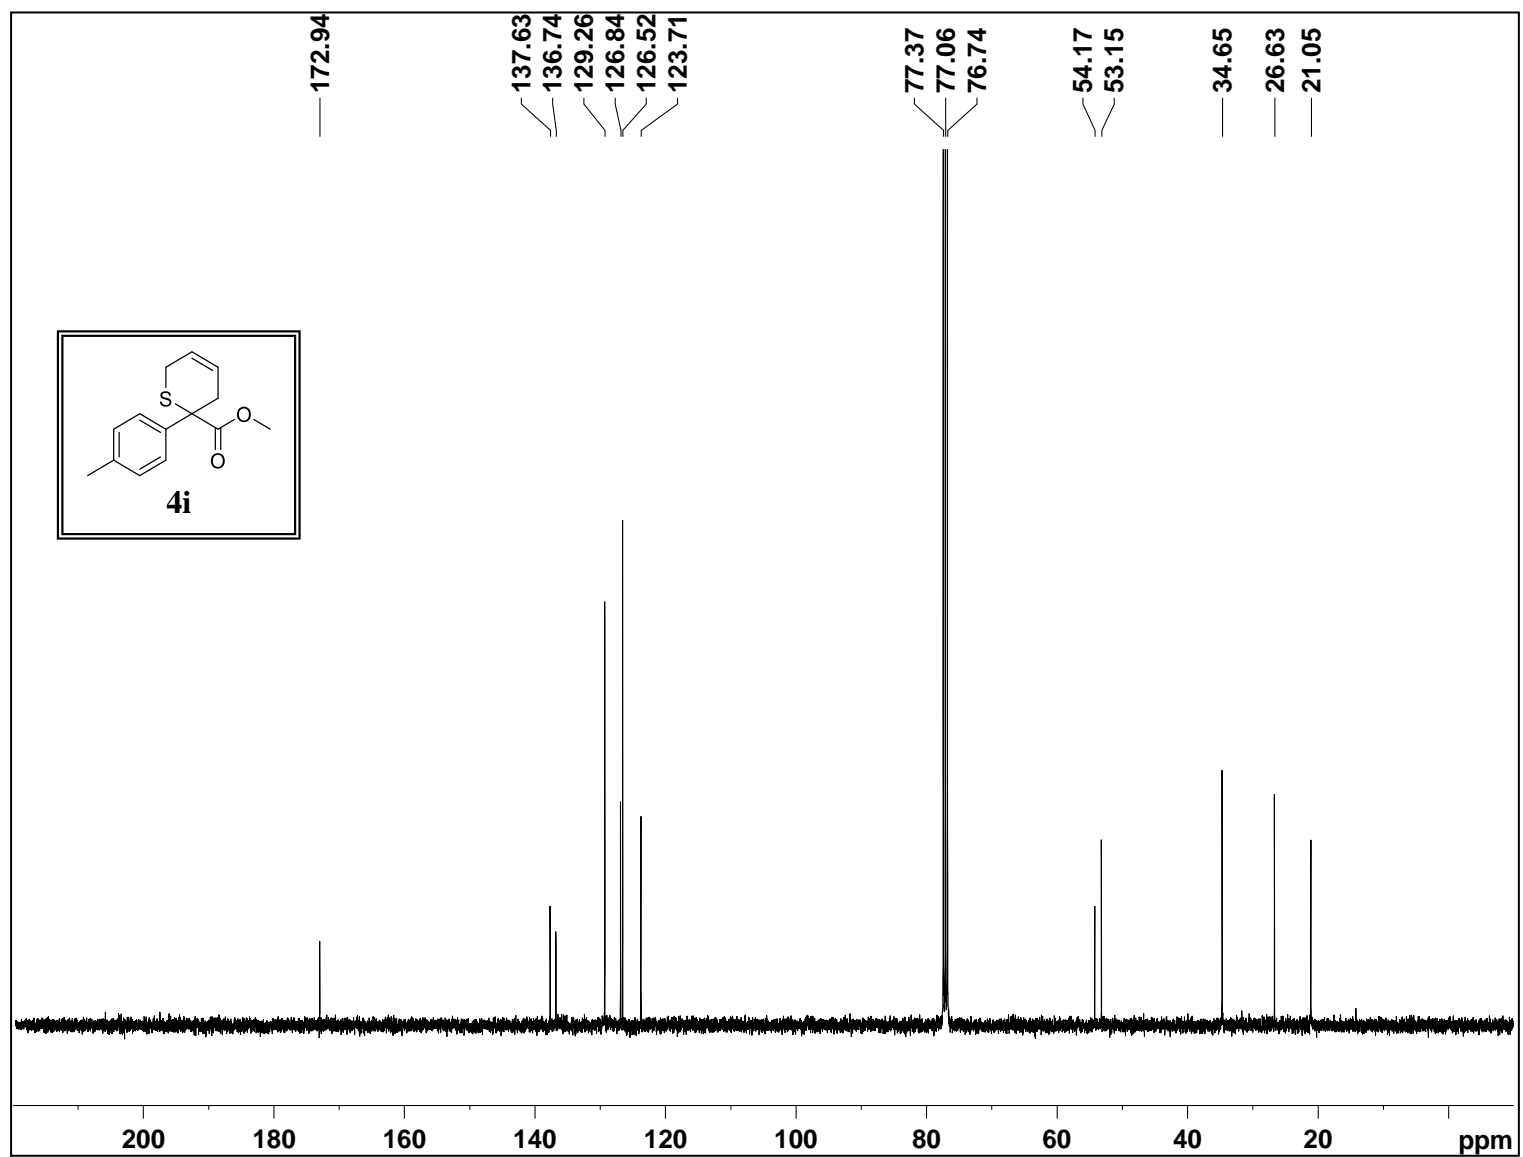

<sup>1</sup>H NMR for compound **4j** (400 MHz, CDCl<sub>3</sub>)

(data)

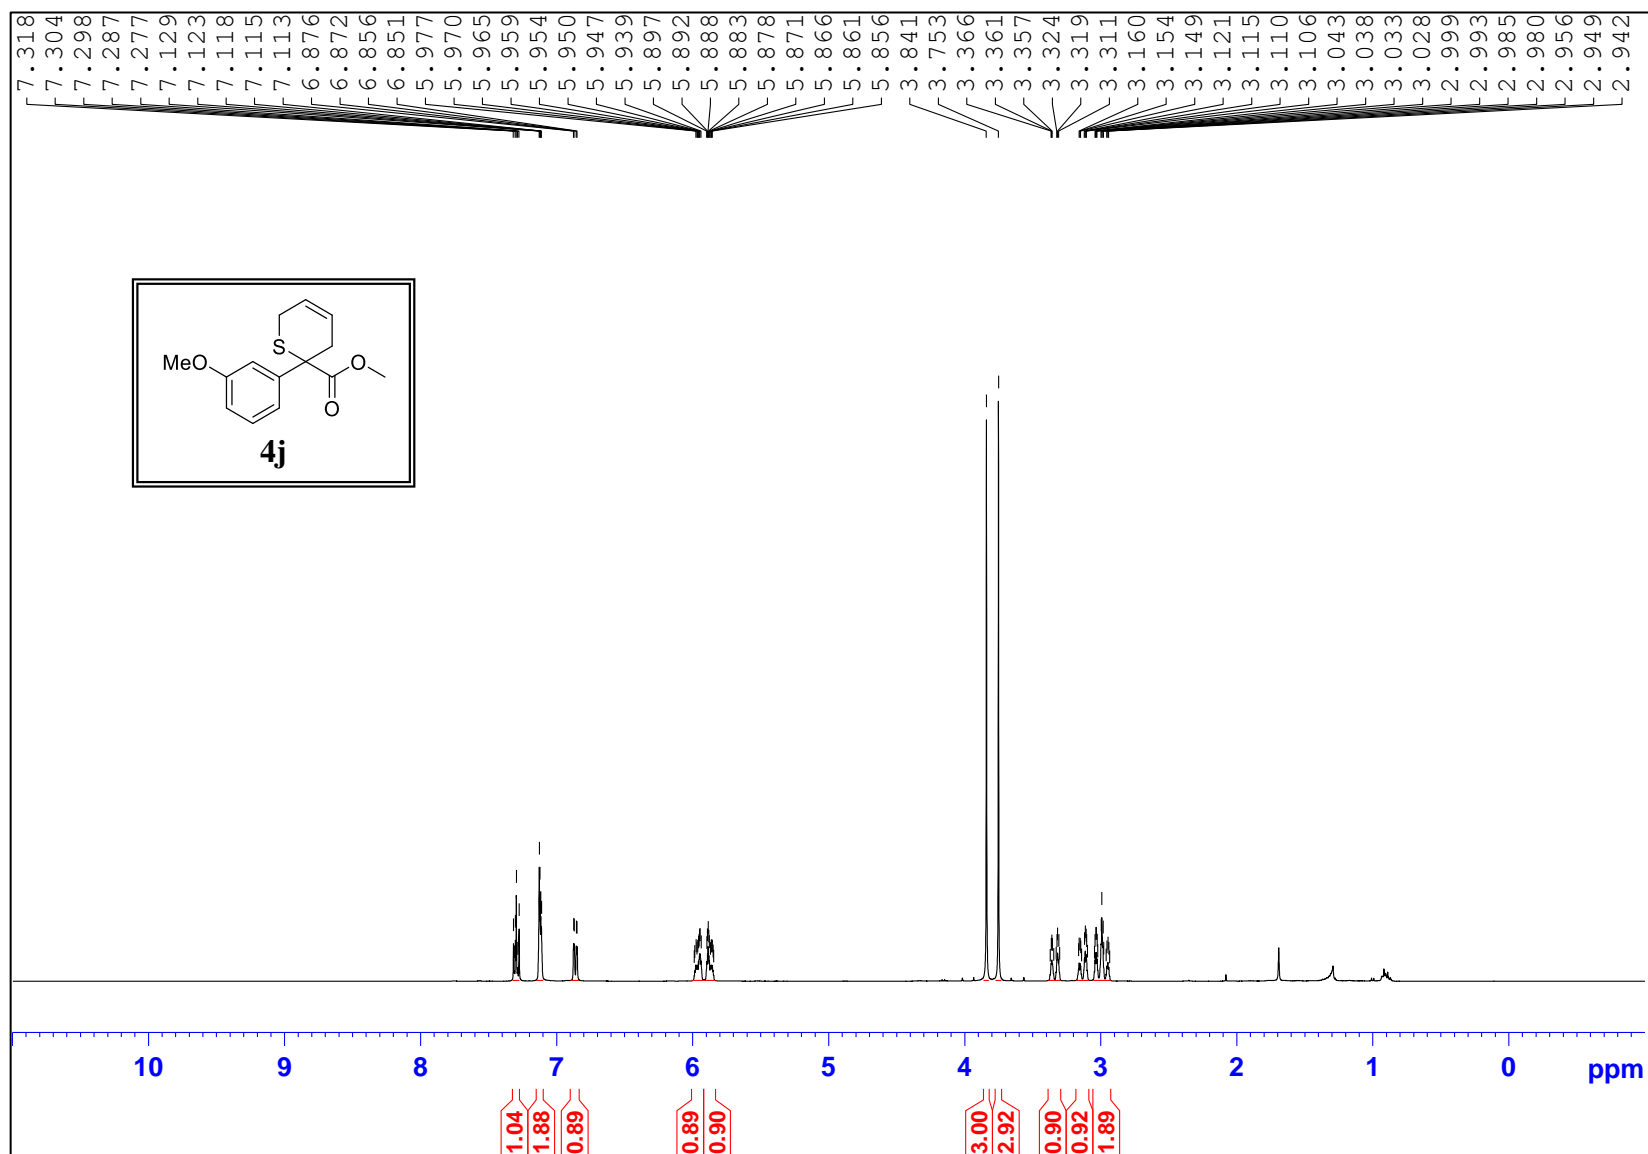

$^{13}\text{C}\{^1\text{H}\}$  NMR for compound **4j** (101 MHz,  $\text{CDCl}_3$ )

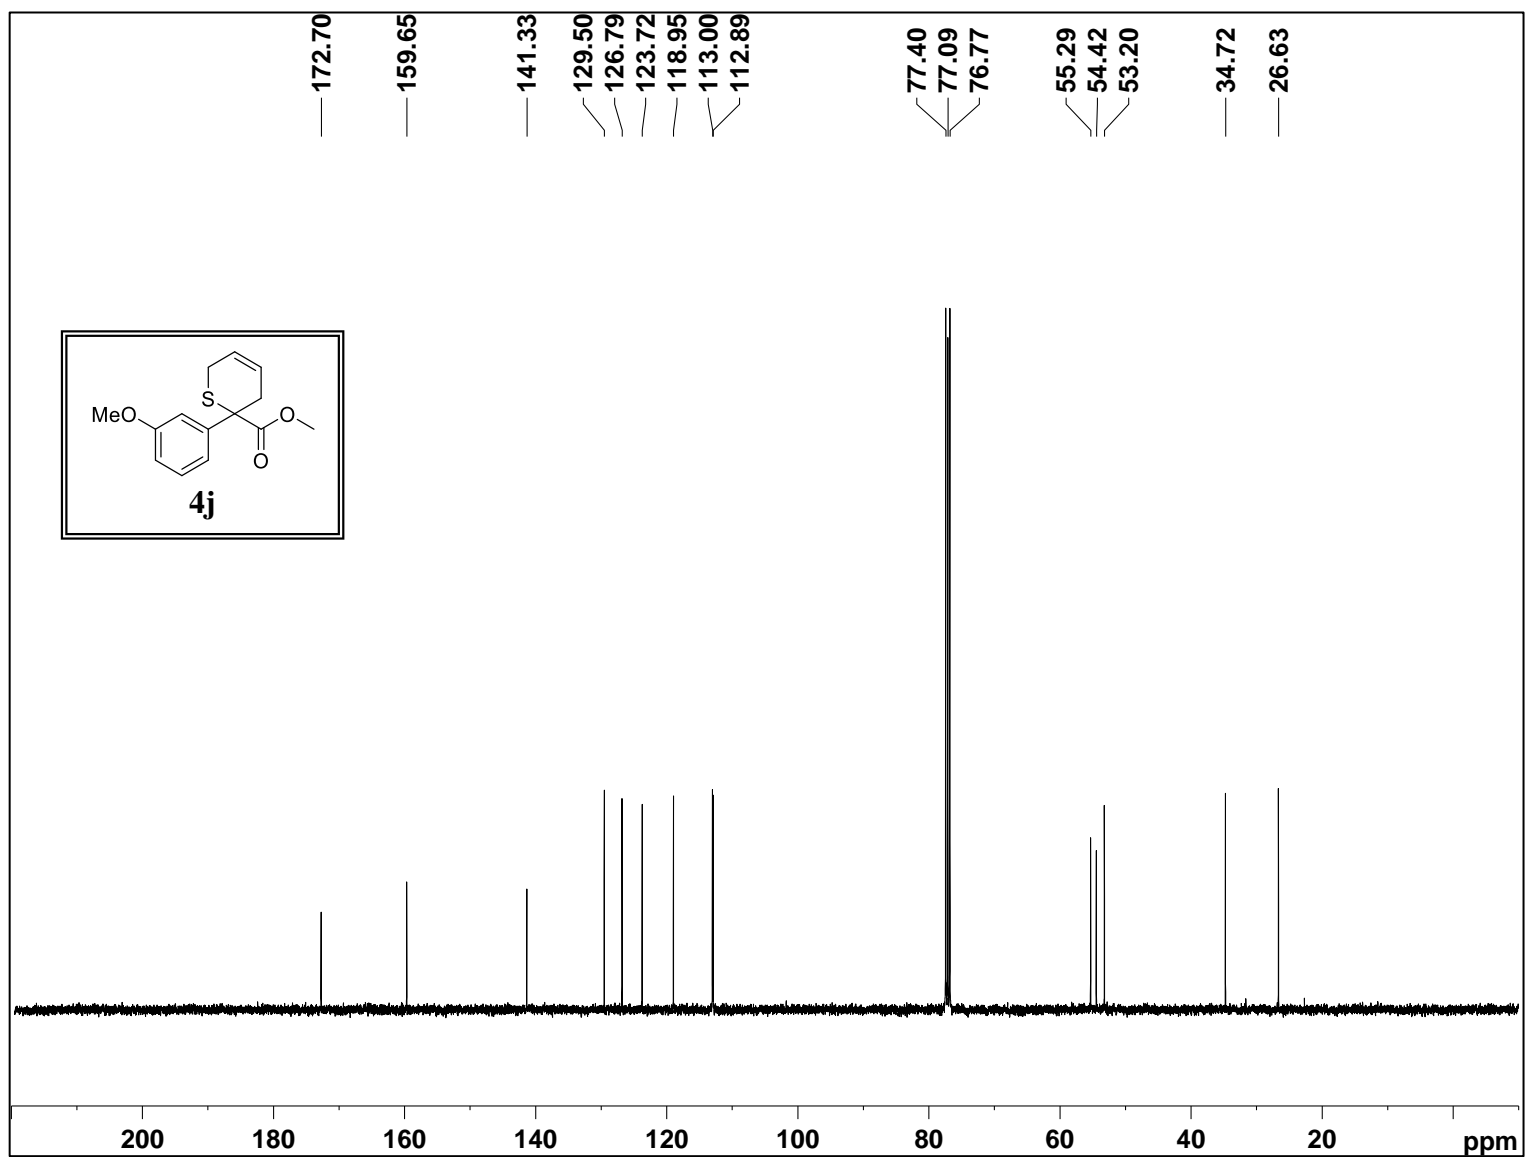

<sup>1</sup>H NMR for compound **4k** (400 MHz, CDCl<sub>3</sub>)

(data)

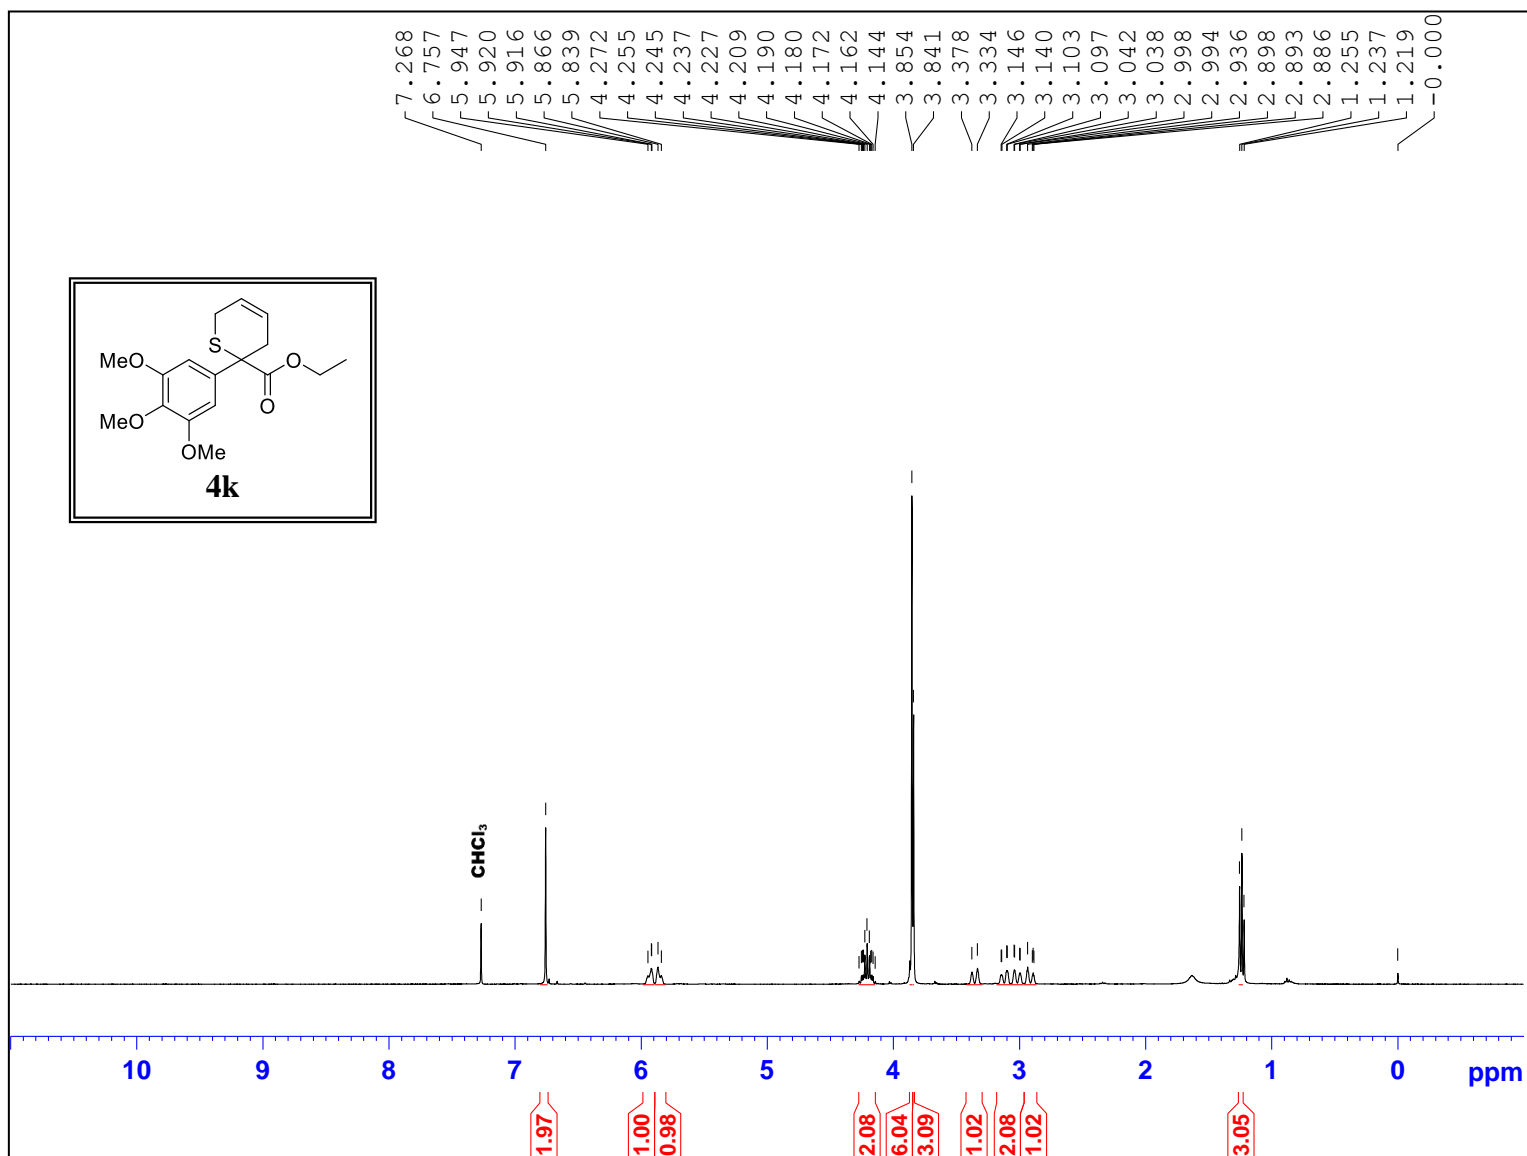

$^{13}\text{C}\{^1\text{H}\}$  NMR for compound **4k** (101 MHz,  $\text{CDCl}_3$ )

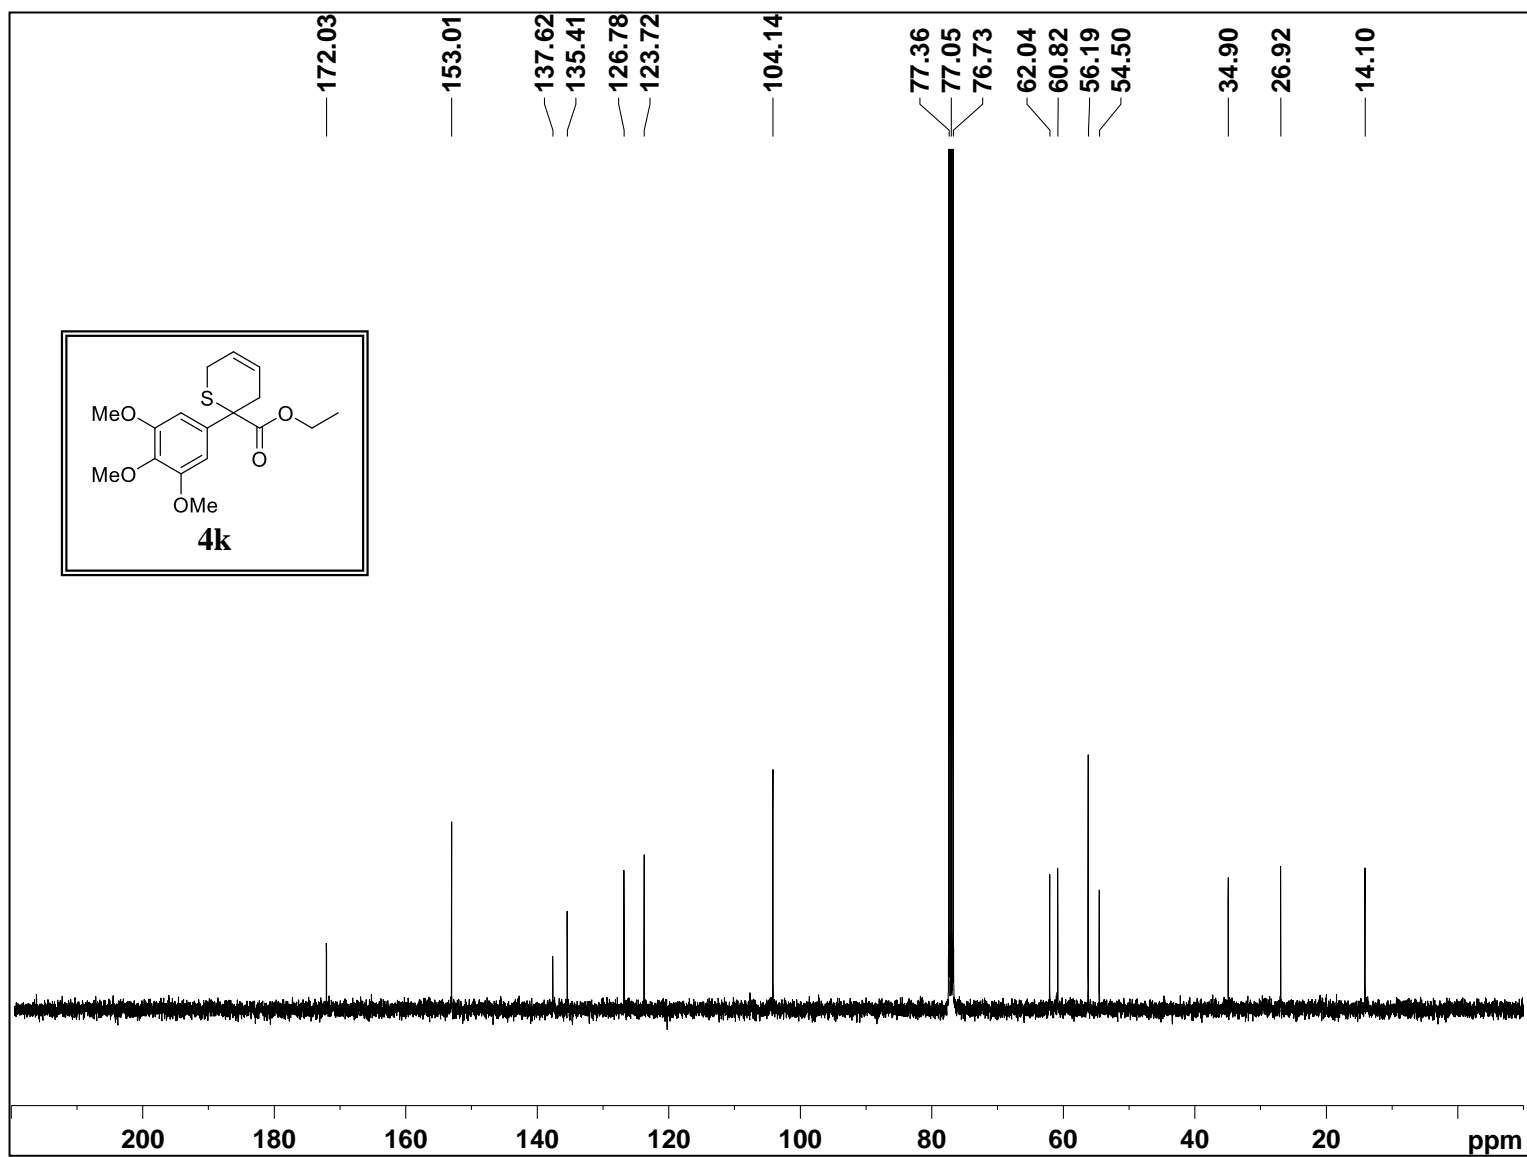

<sup>1</sup>H NMR for compound **4I** (400 MHz, CDCl<sub>3</sub>)

(data)

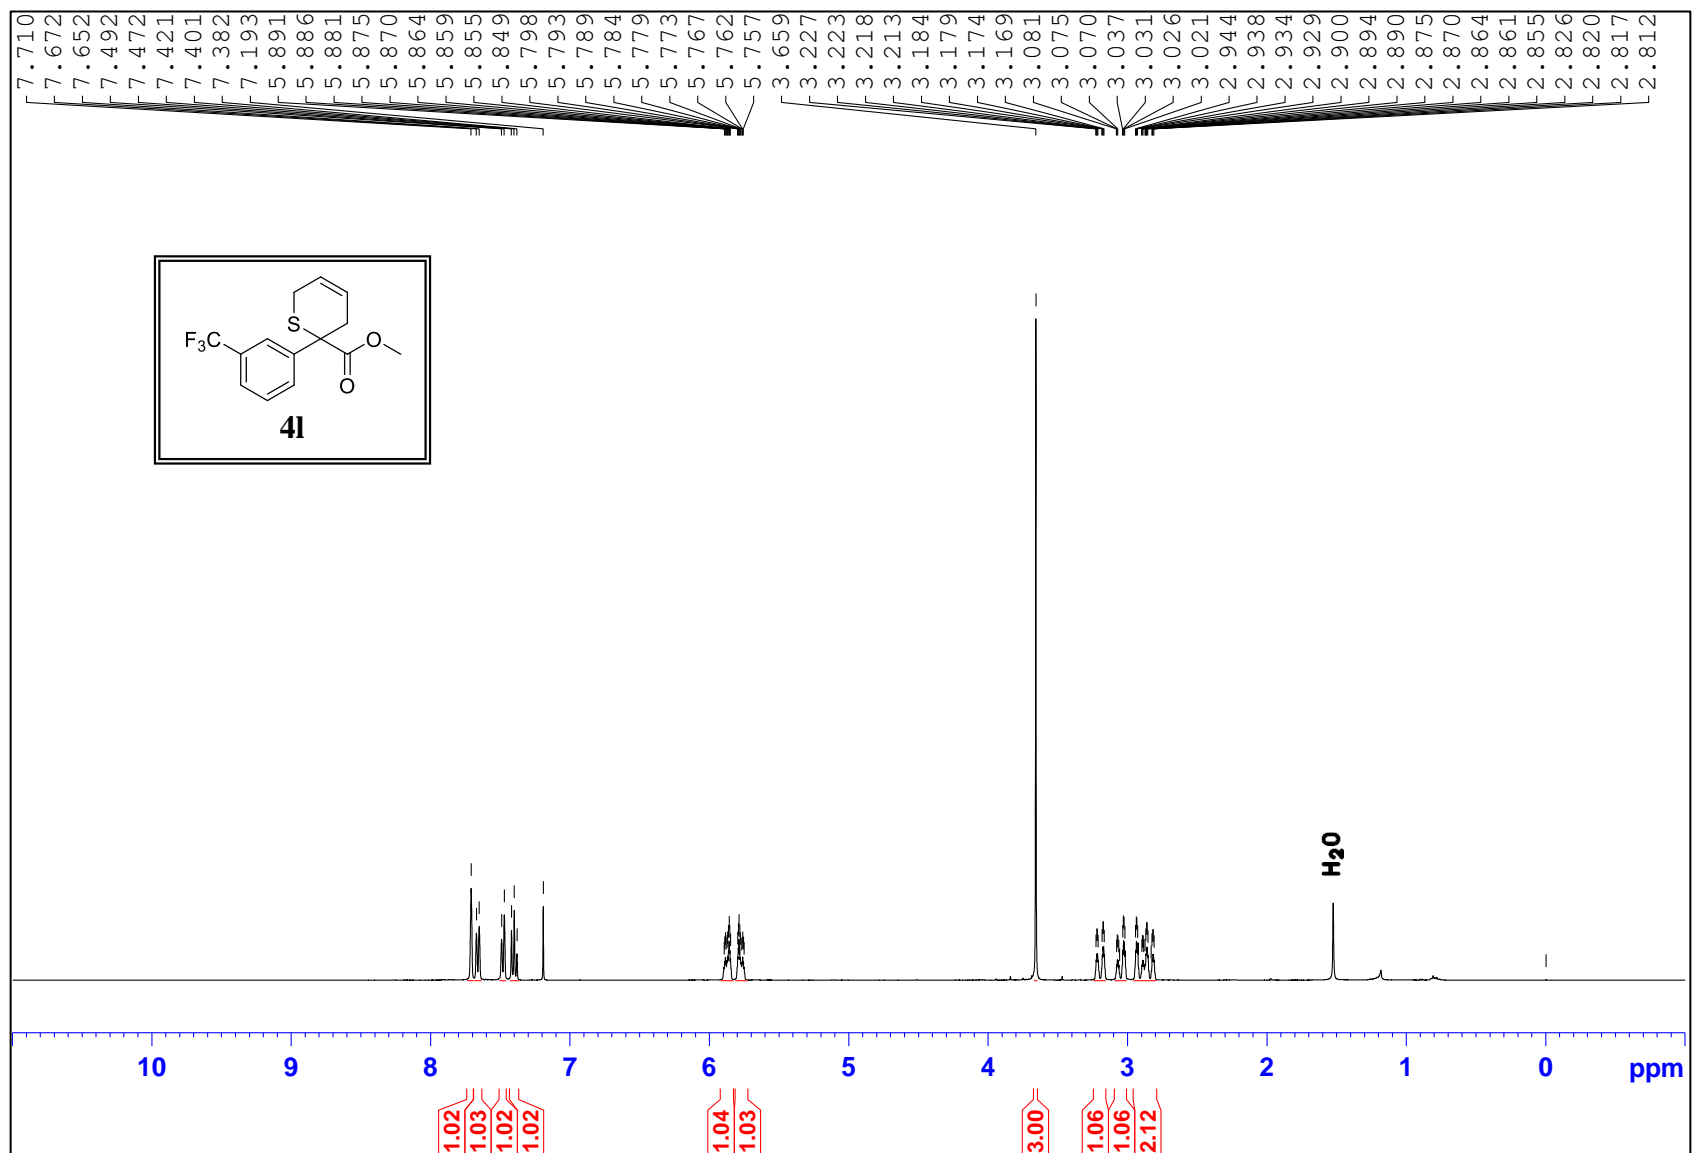

$^{13}\text{C}\{^1\text{H}\}$  NMR for compound **41** (101 MHz,  $\text{CDCl}_3$ )

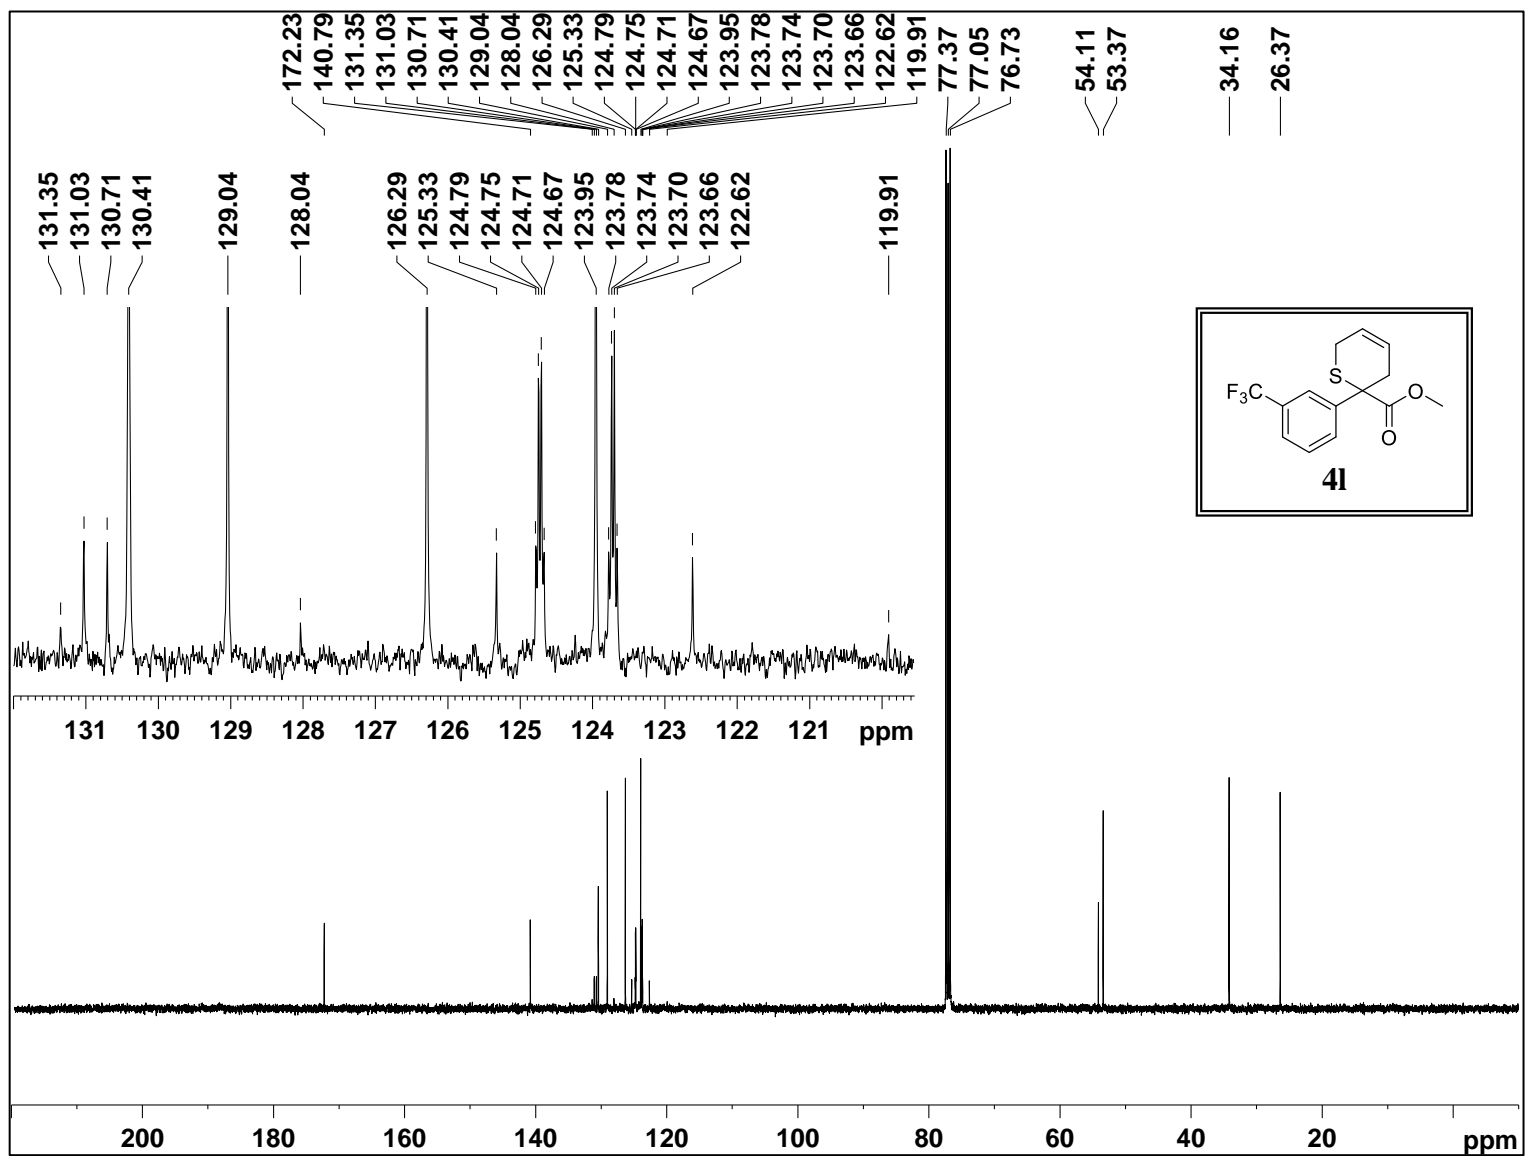



[<sup>1</sup>H, <sup>1</sup>H] COSY for compound **4I** (400 MHz, CDCl<sub>3</sub>)

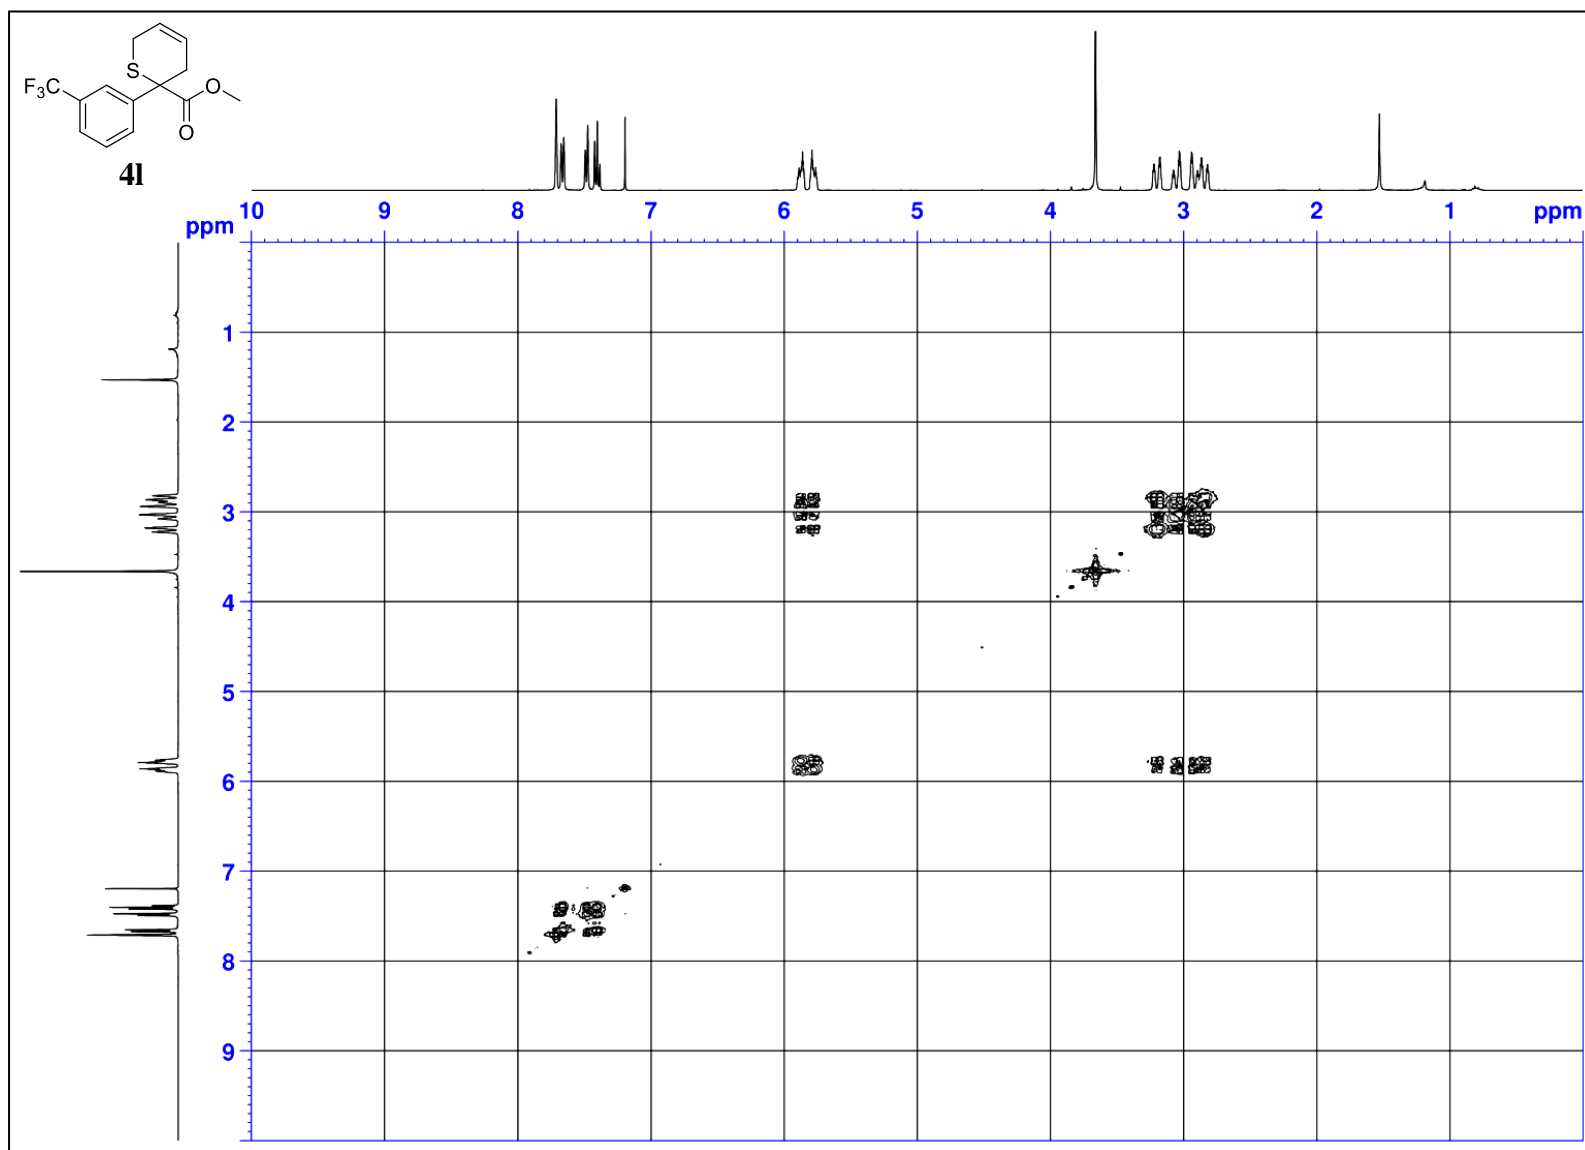

[<sup>1</sup>H, <sup>13</sup>C{<sup>1</sup>H}] HSQC for compound **4I** (400 MHz, CDCl<sub>3</sub>)

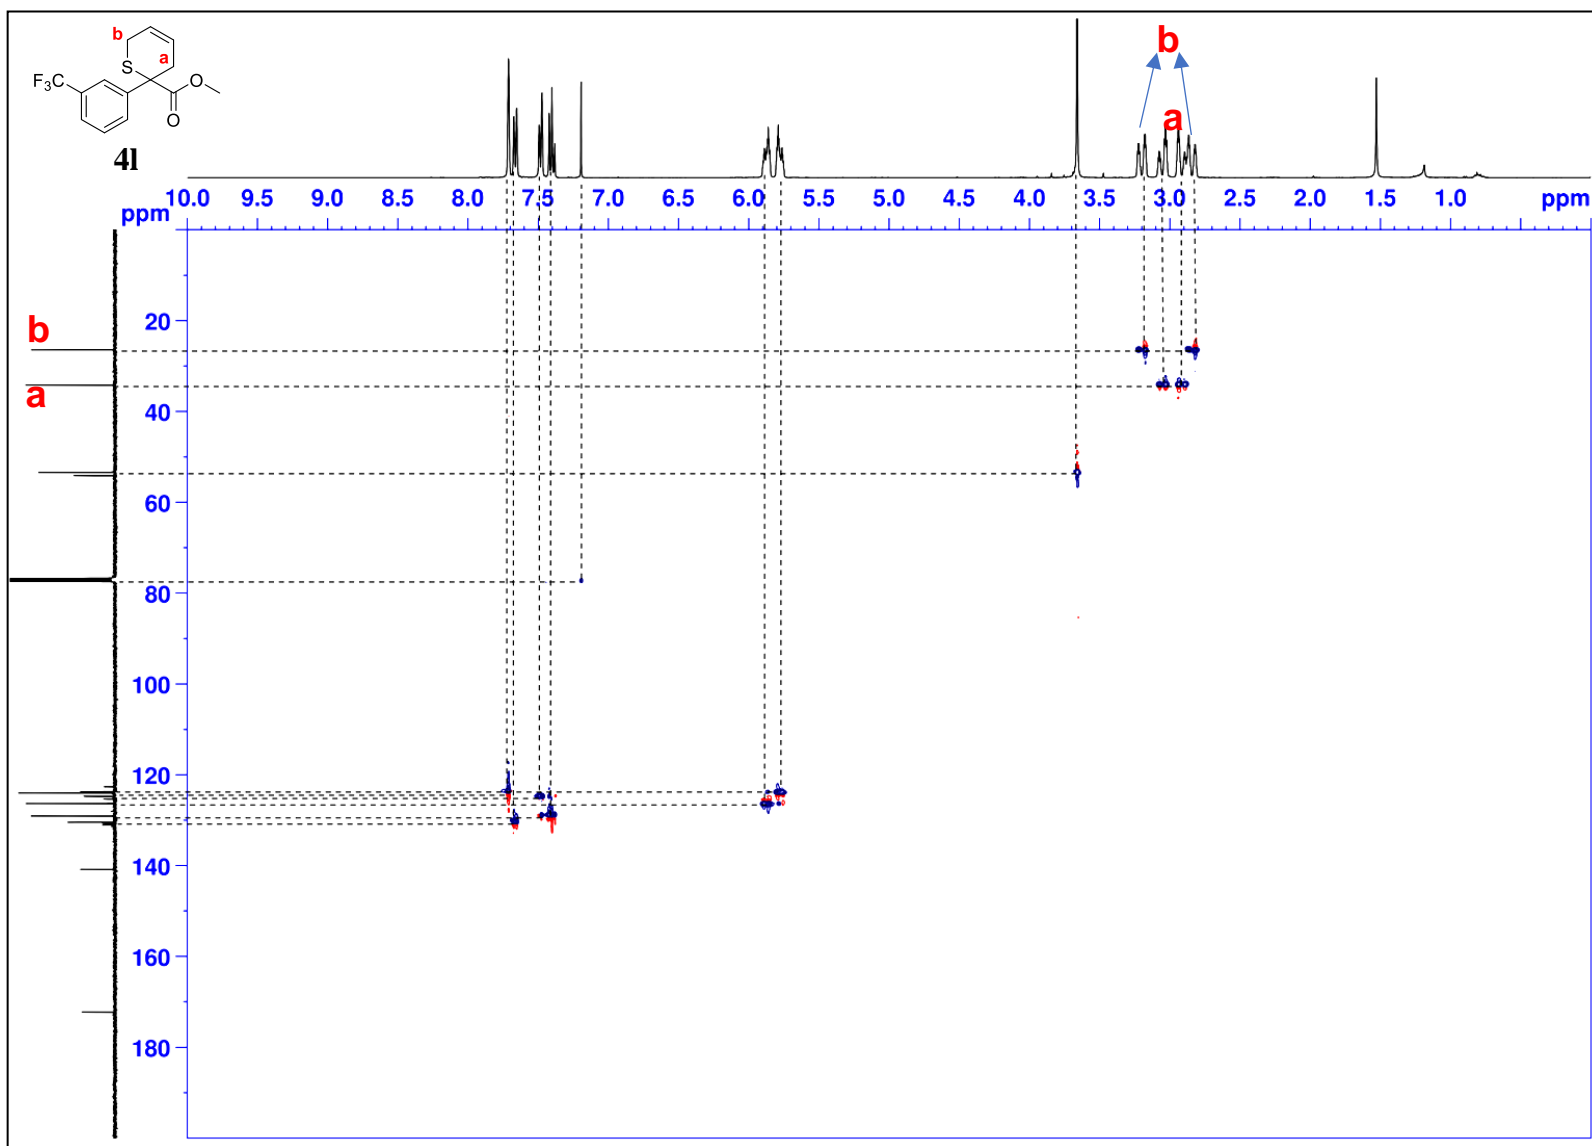

$^{13}\text{C}\{^1\text{H}\}$  DEPT-135 NMR for compound **4I** (101 MHz,  $\text{CDCl}_3$ )

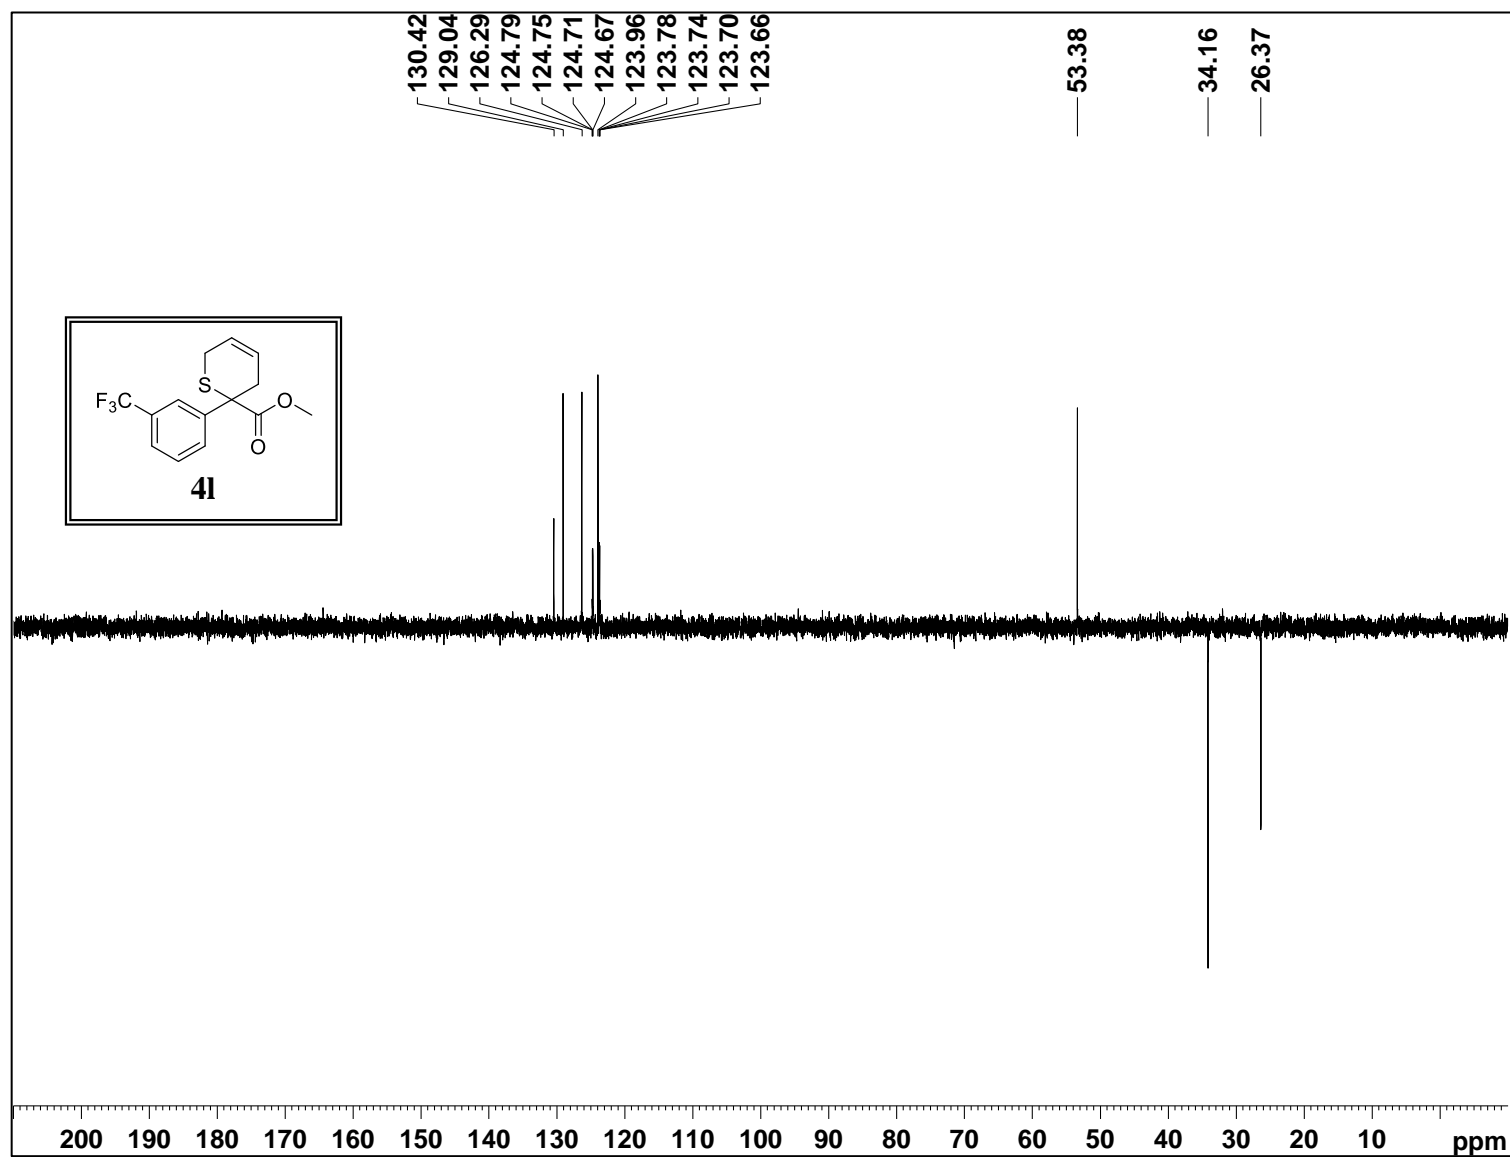

<sup>1</sup>H NMR for compound **4m** (400 MHz, CDCl<sub>3</sub>)

(data)

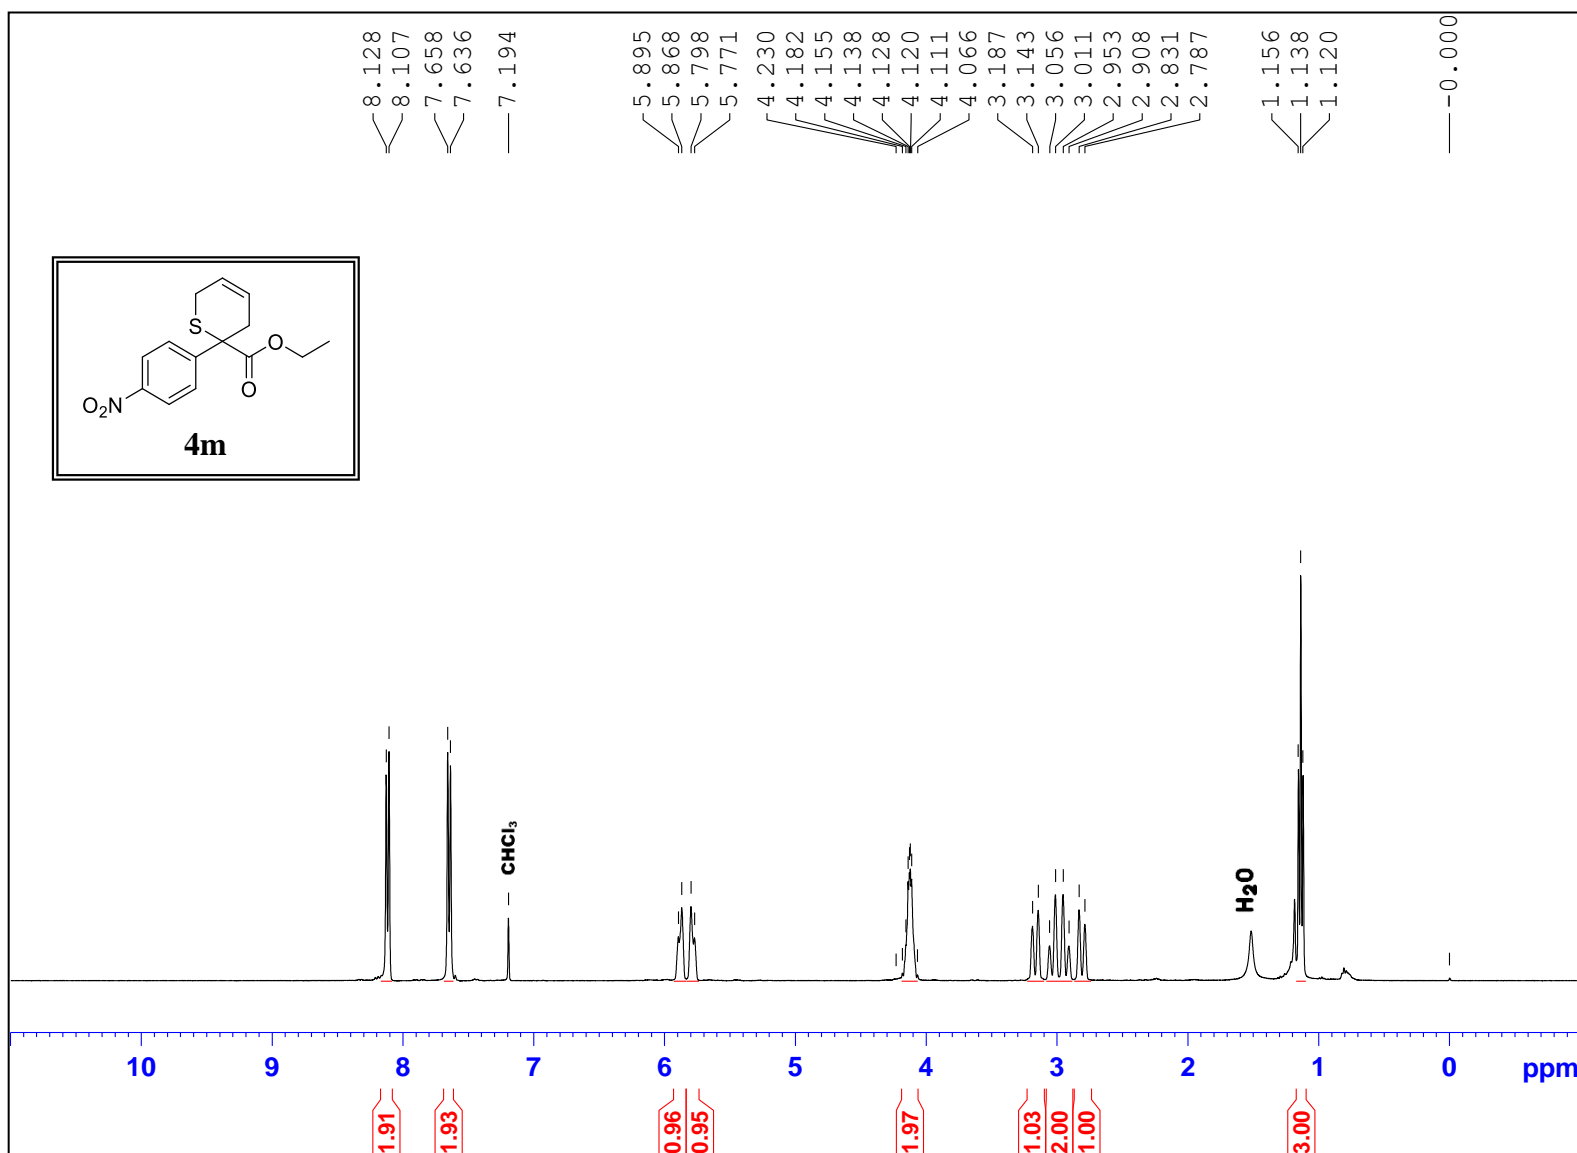

$^{13}\text{C}\{^1\text{H}\}$  NMR for compound **4m** (101 MHz,  $\text{CDCl}_3$ )

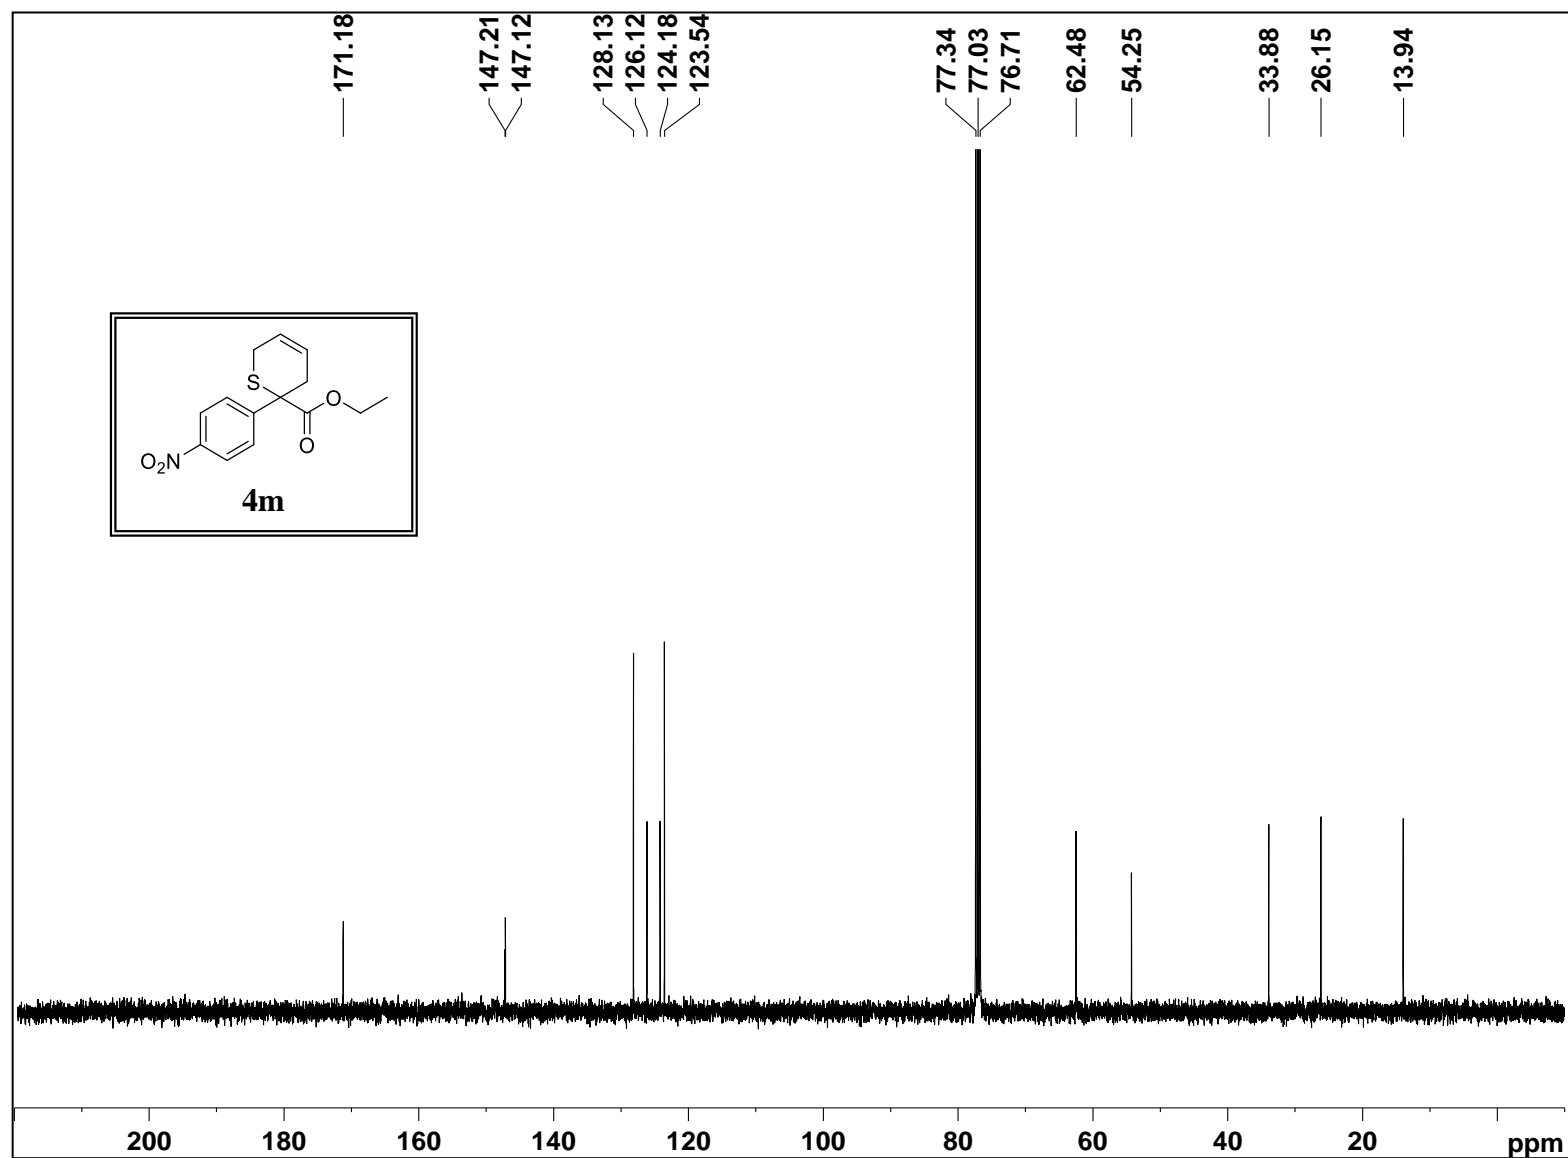

<sup>1</sup>H NMR for compound **4n** (400 MHz, CDCl<sub>3</sub>) (data)

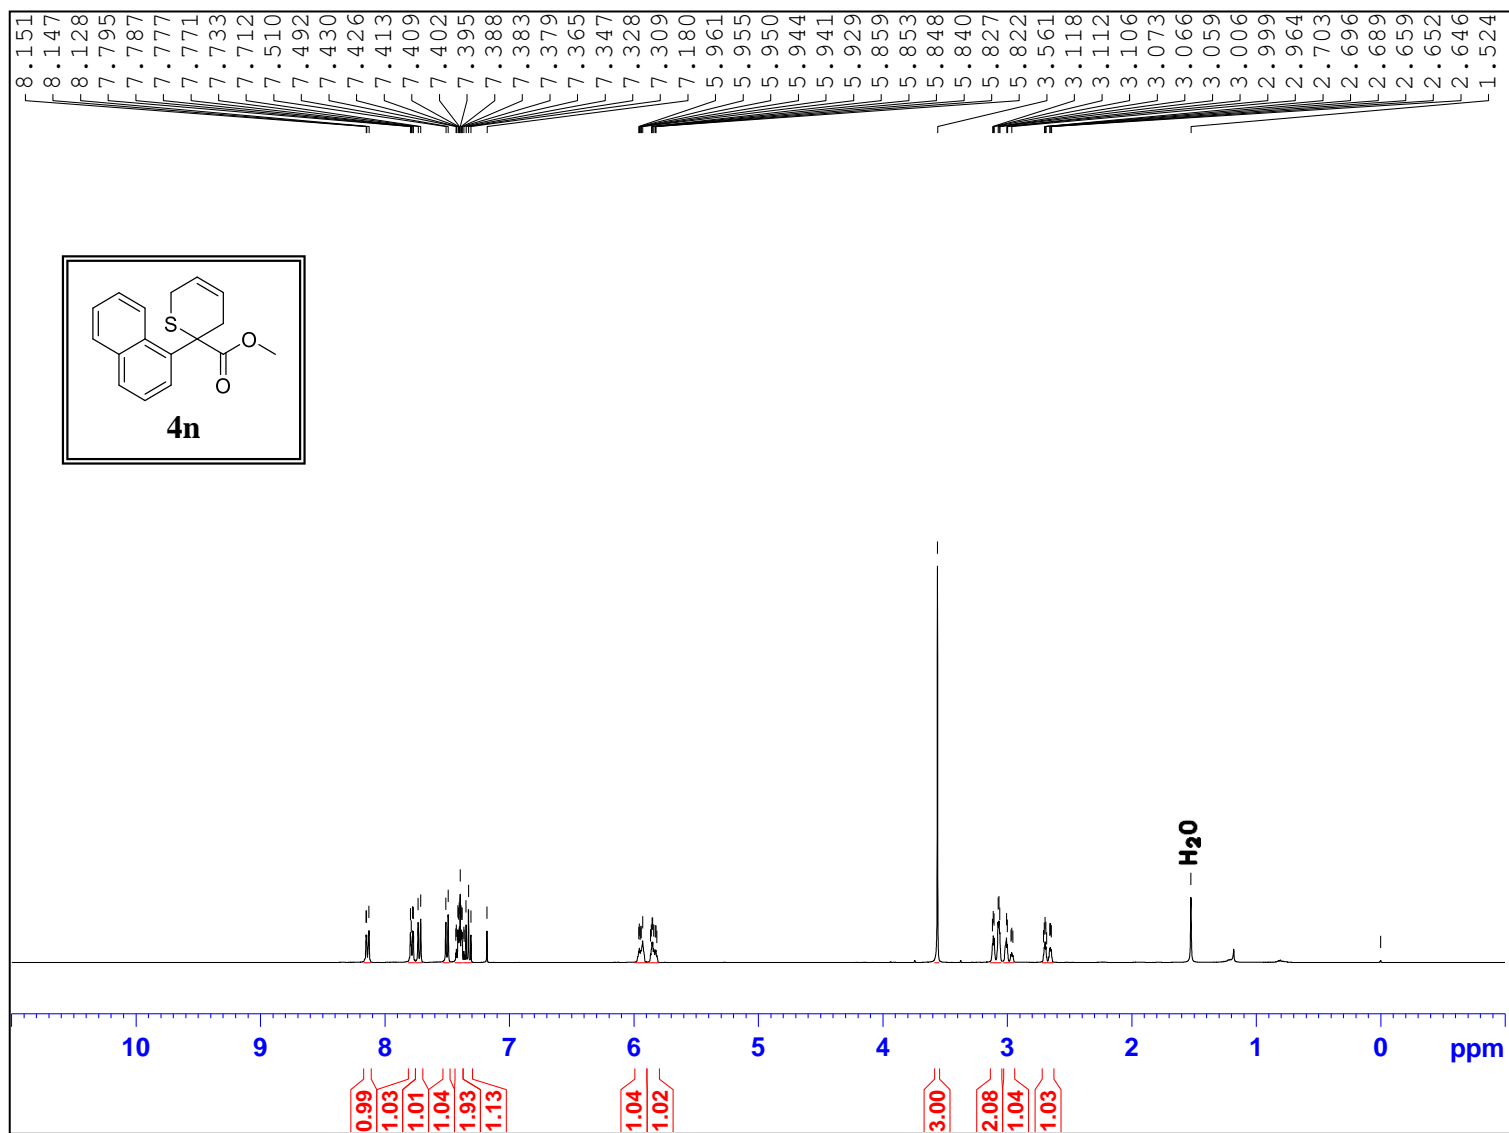

$^{13}\text{C}\{^1\text{H}\}$  NMR for compound **4n** (101 MHz,  $\text{CDCl}_3$ )

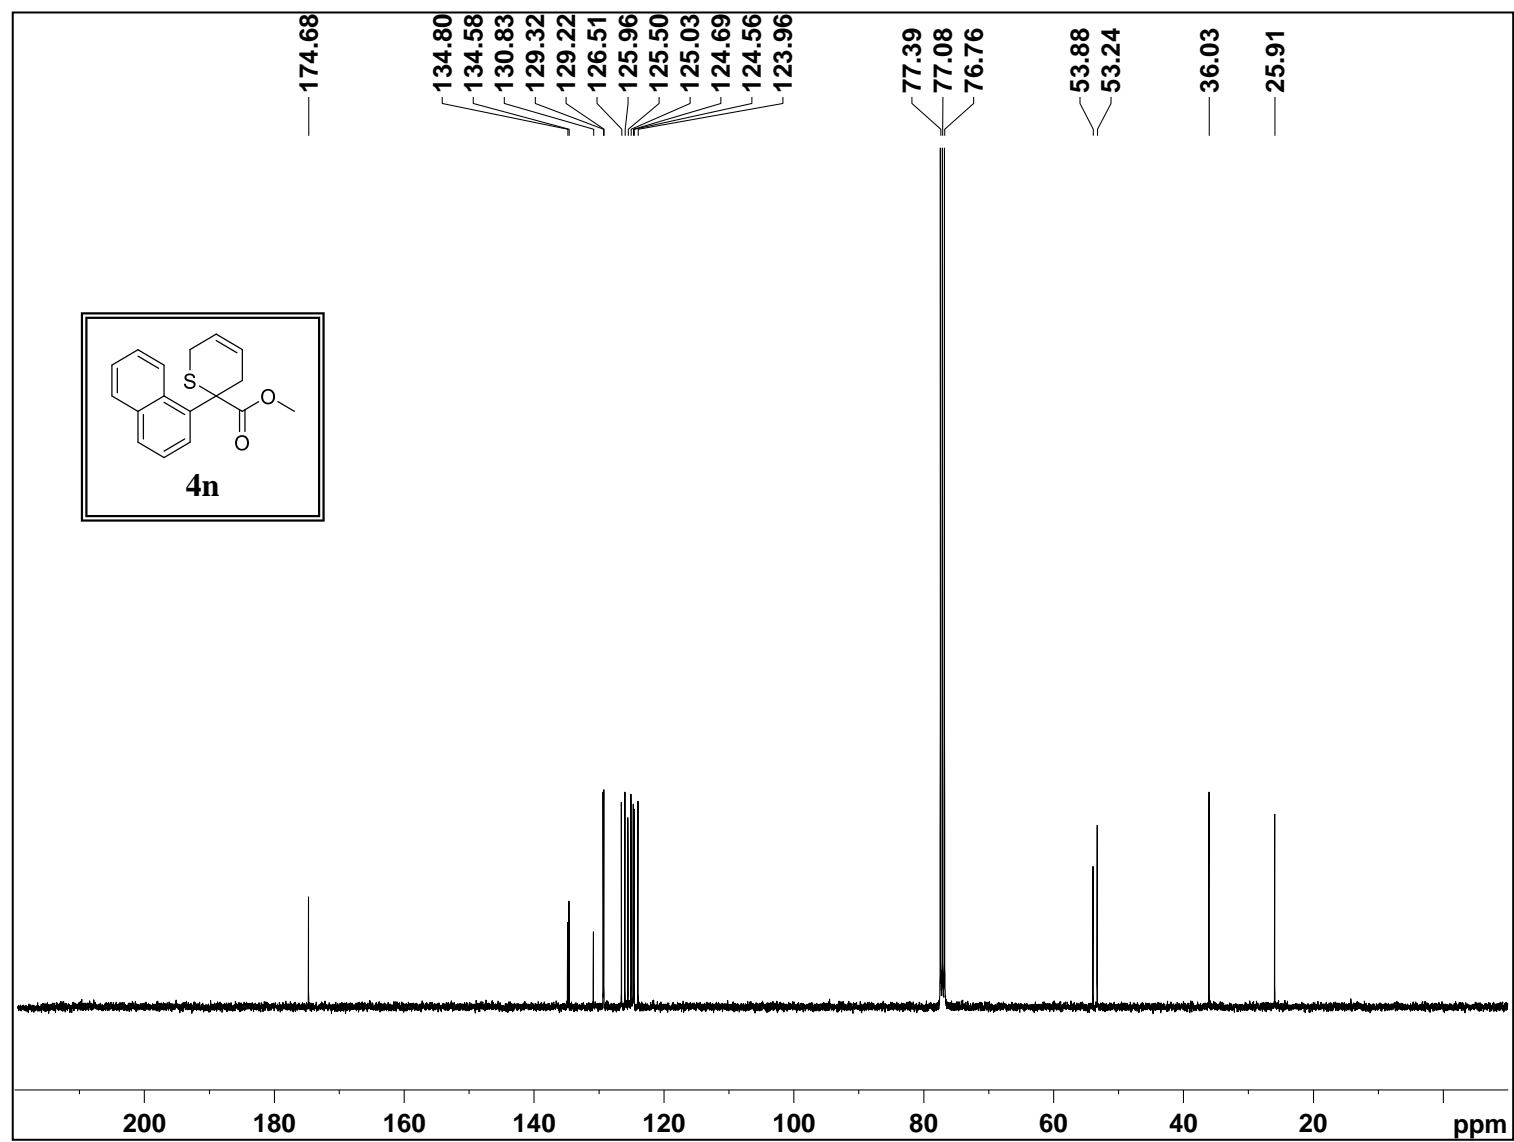

<sup>1</sup>H NMR for compound **4o** (400 MHz, CDCl<sub>3</sub>) (data)

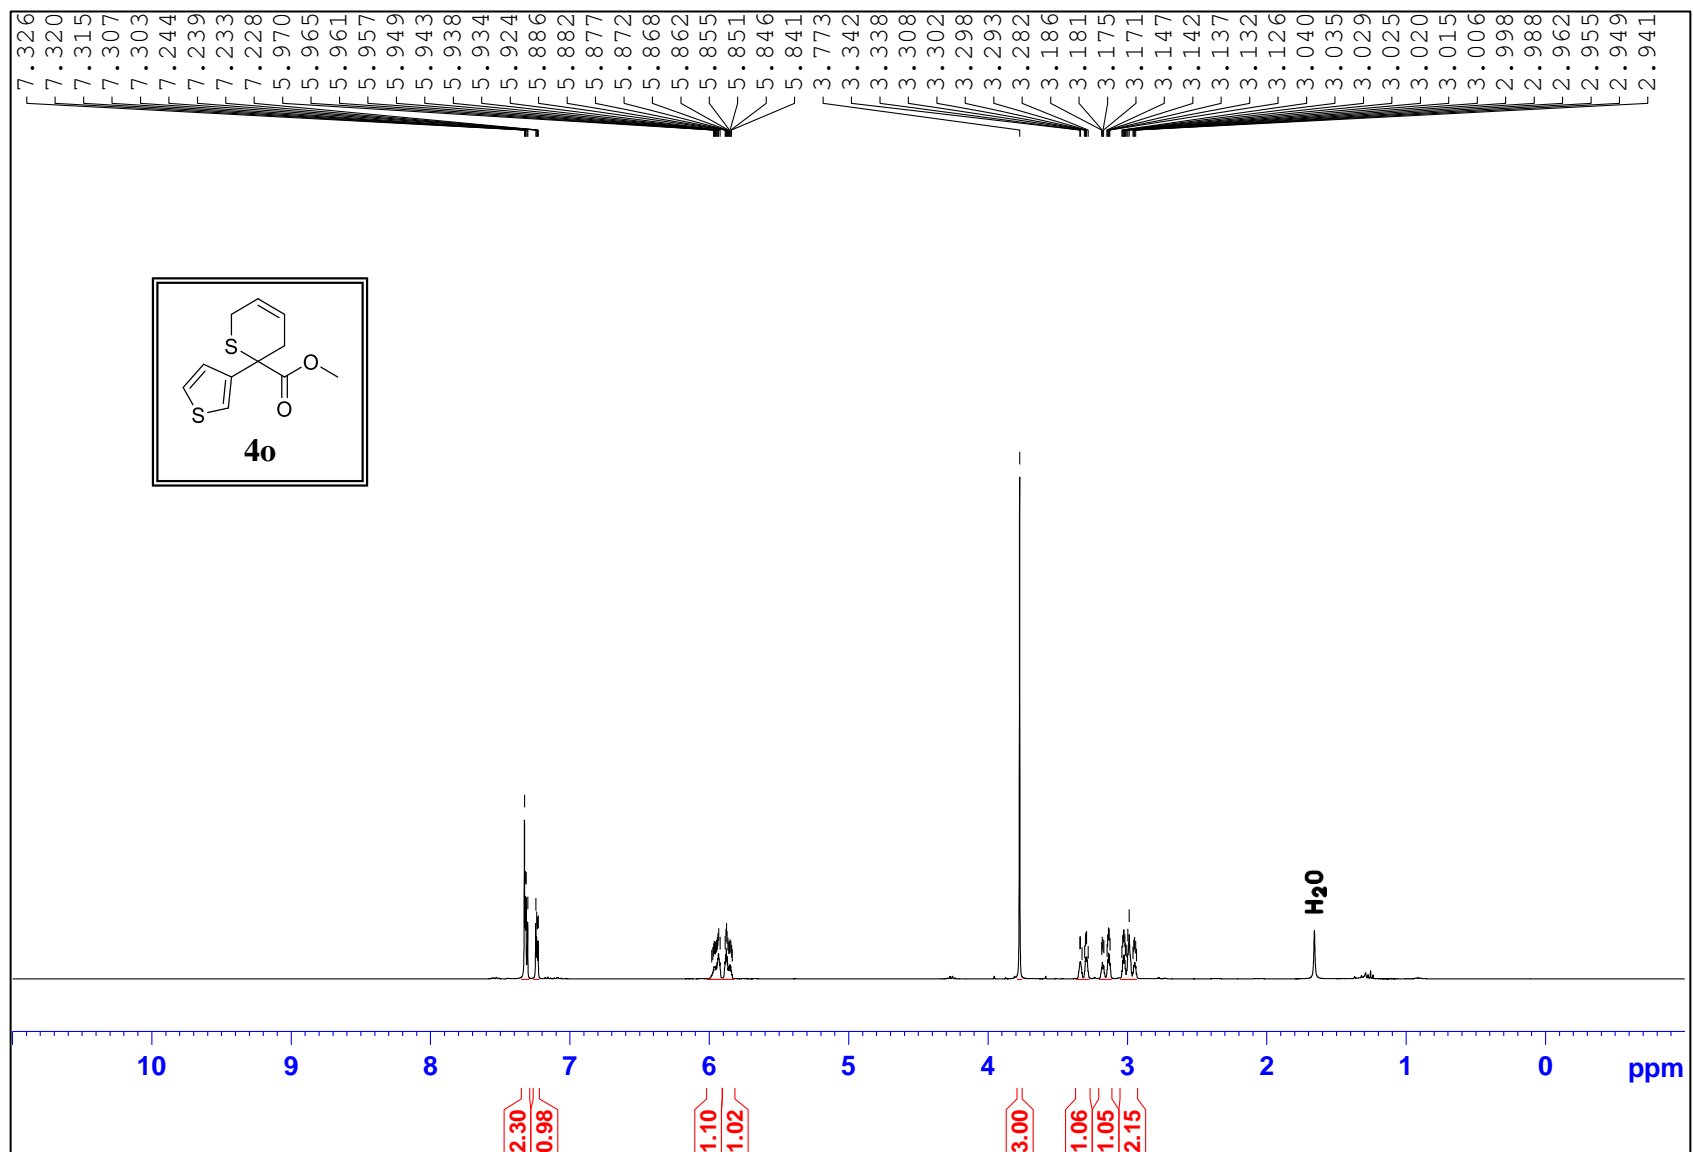



$^{13}\text{C}\{^1\text{H}\}$  NMR for compound **4o** (101 MHz,  $\text{CDCl}_3$ )

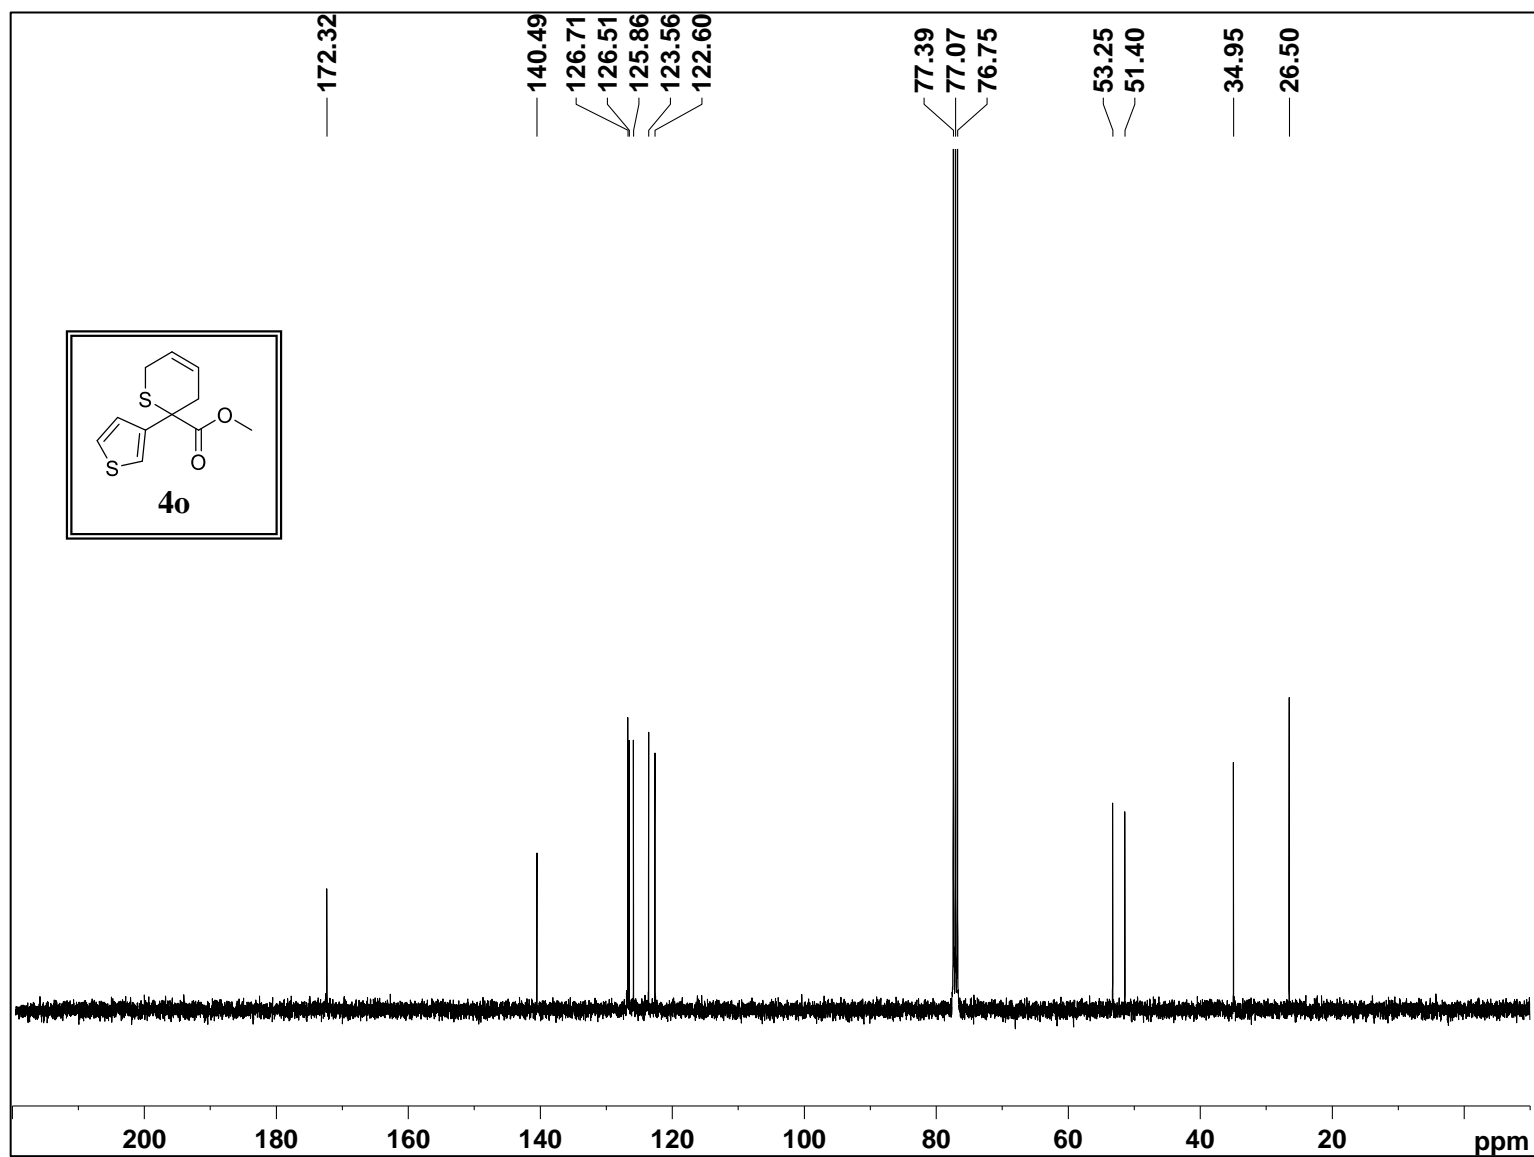

<sup>1</sup>H NMR for compound **4p** (400 MHz, CDCl<sub>3</sub>) (data)

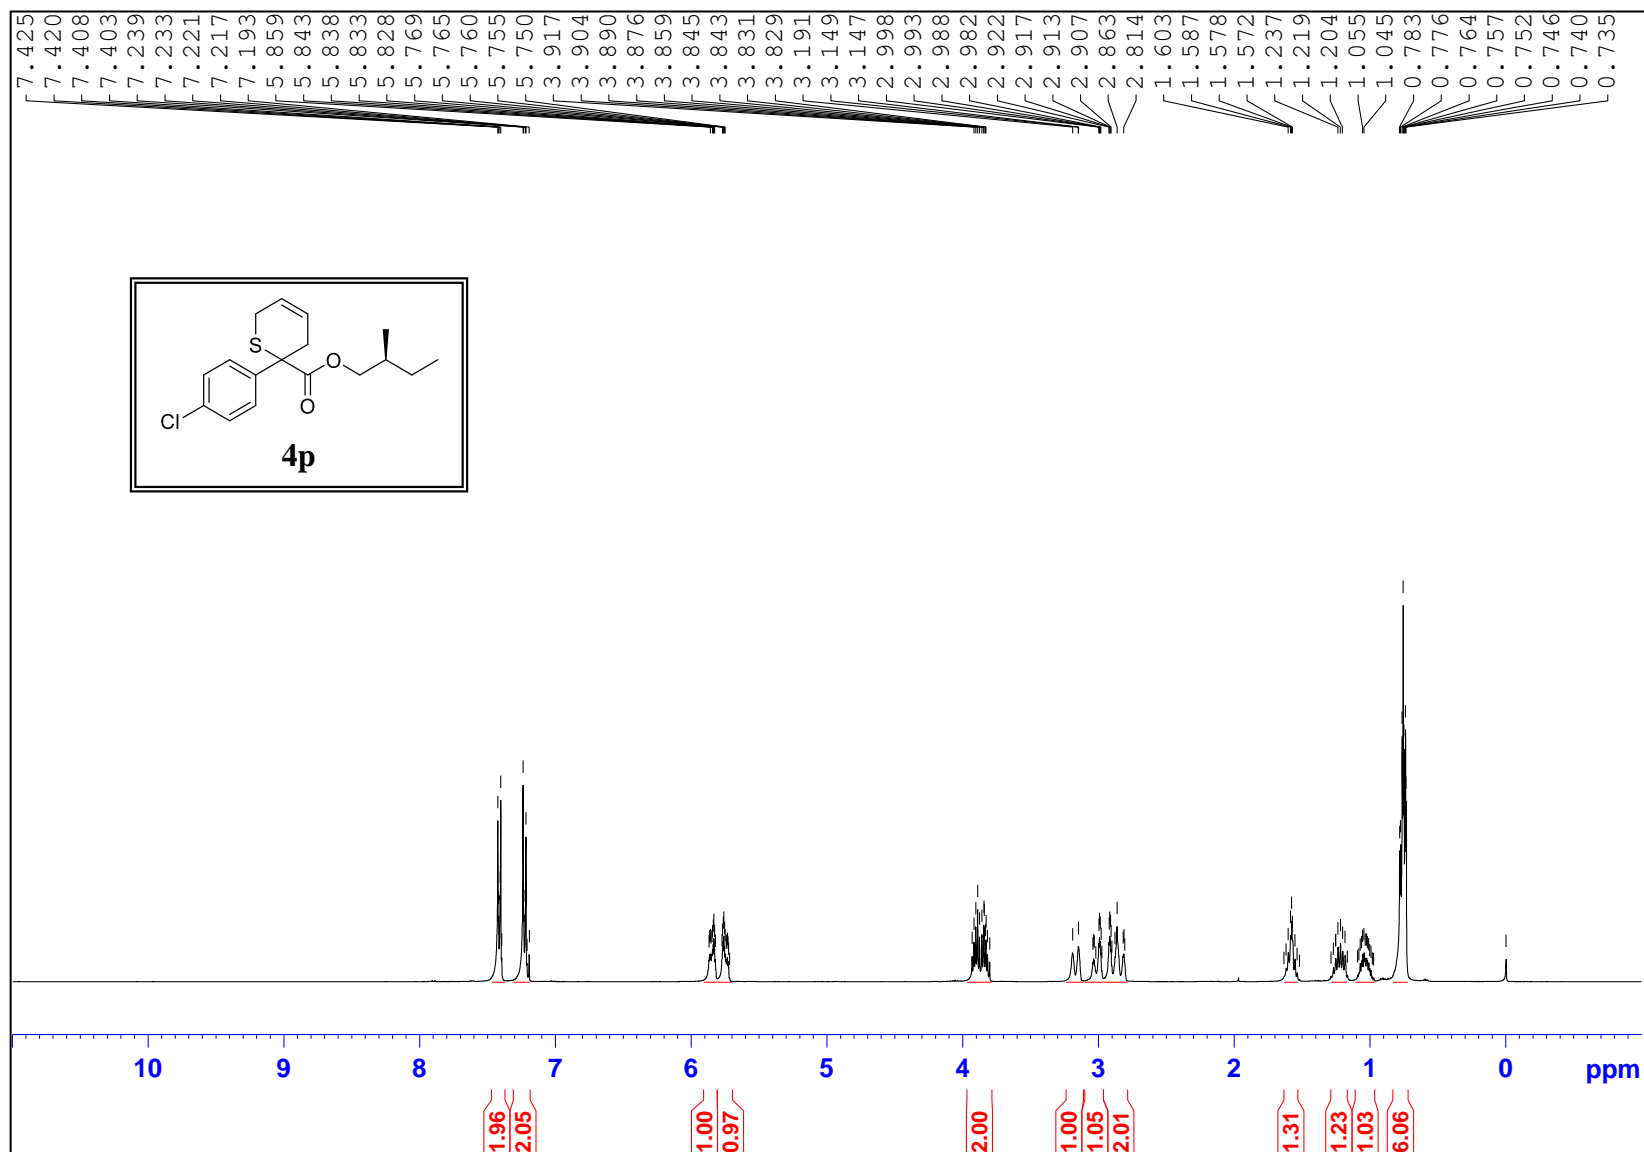

$^{13}\text{C}\{^1\text{H}\}$  NMR for compound **4p** (101 MHz,  $\text{CDCl}_3$ )

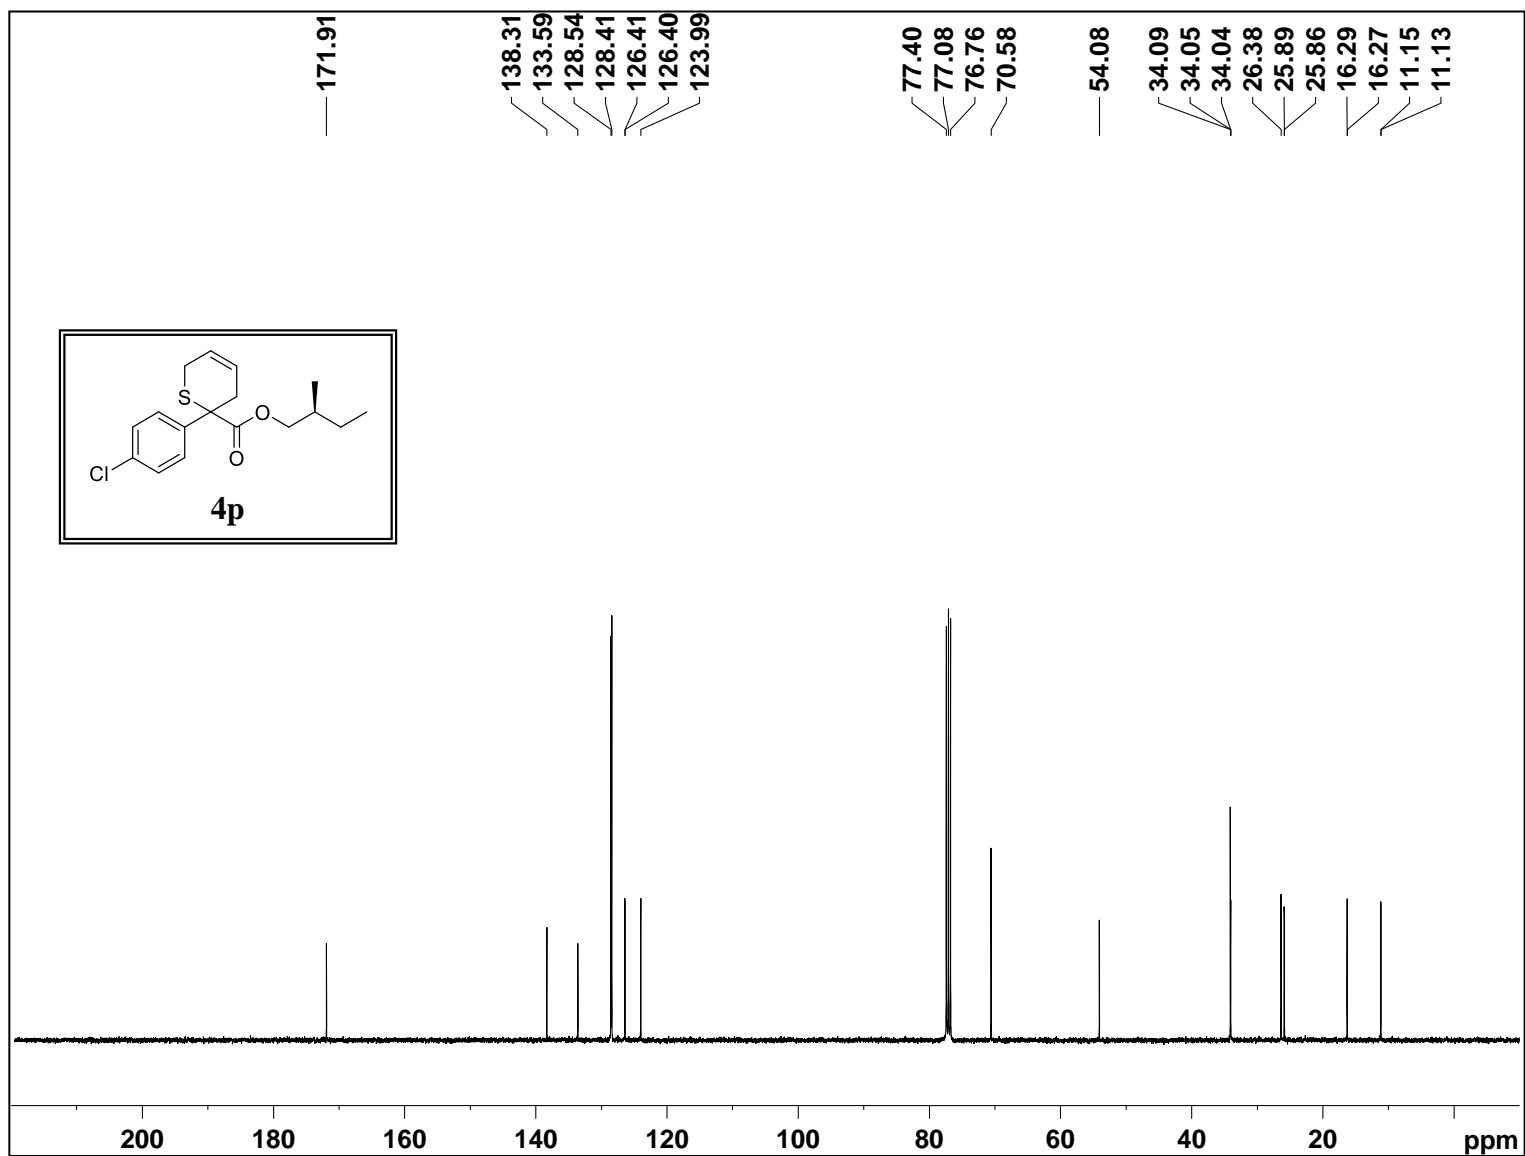

<sup>1</sup>H NMR for compound **4q** (400 MHz, CDCl<sub>3</sub>)

(data)

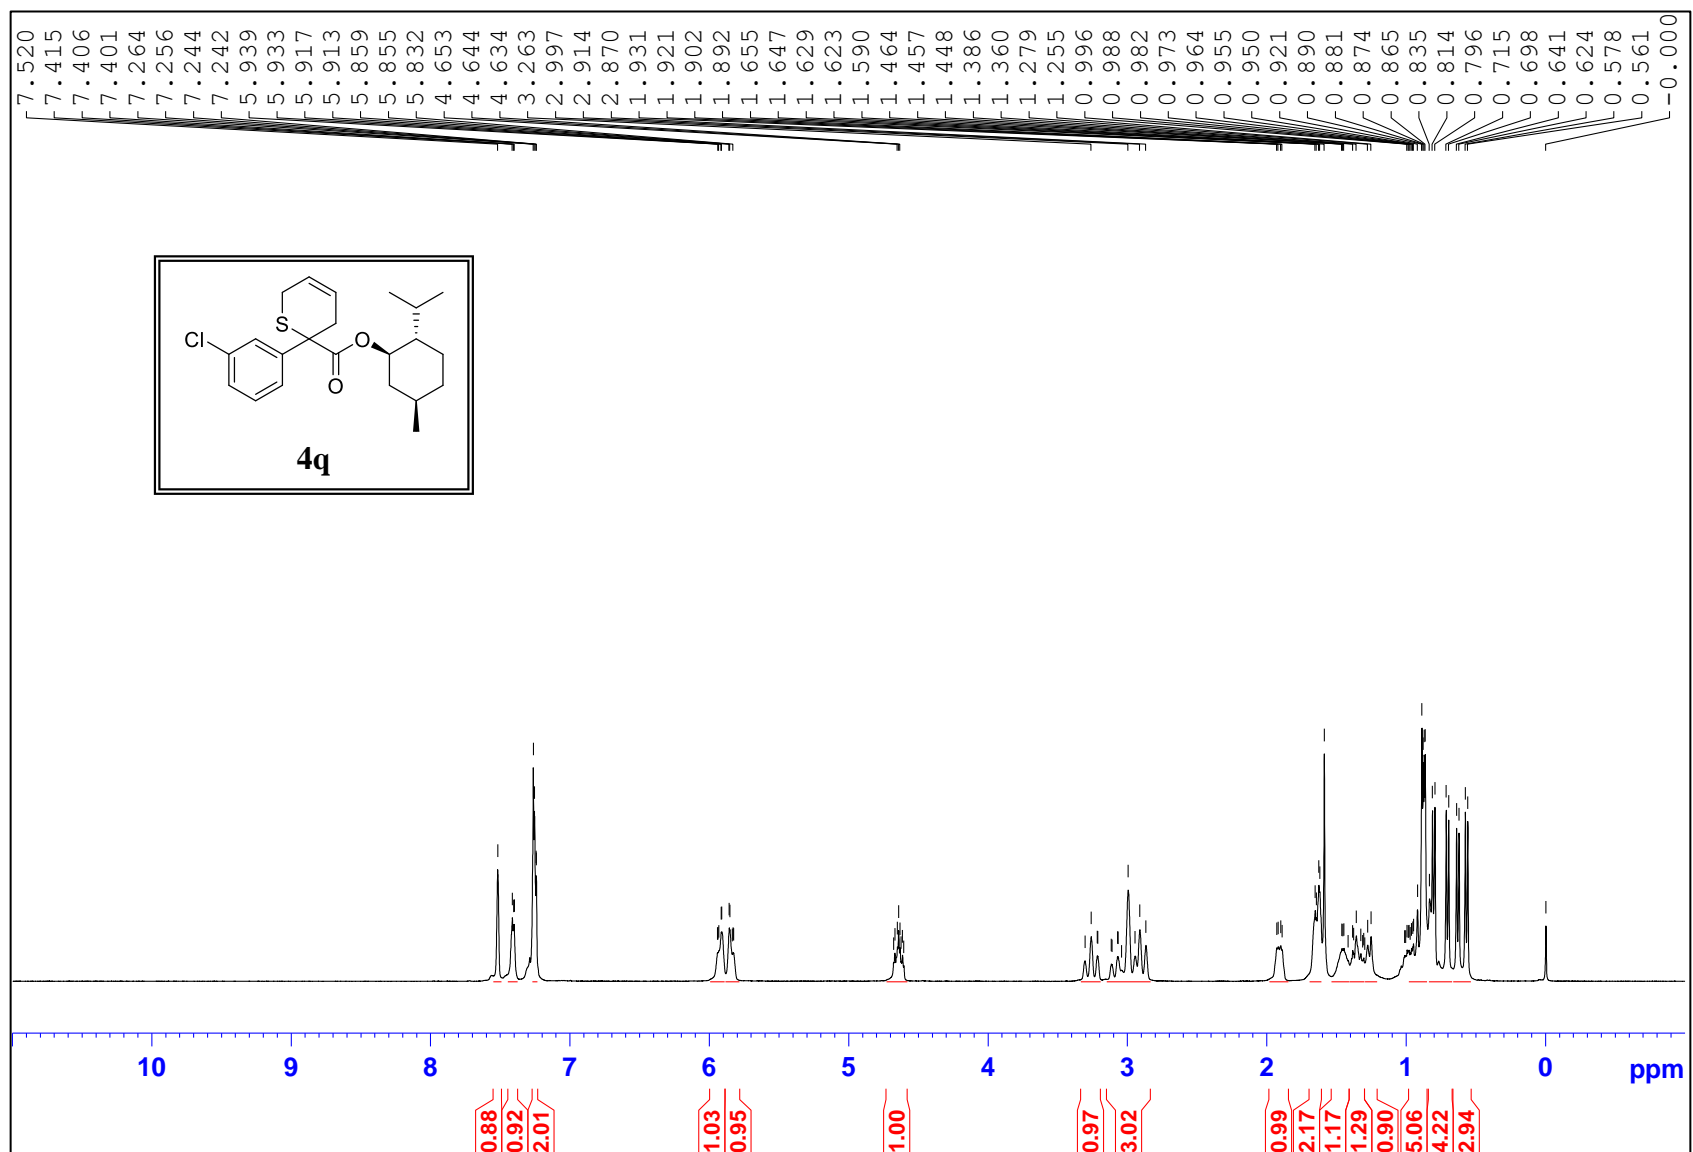

$^{13}\text{C}\{^1\text{H}\}$  NMR for compound **4q** (101 MHz,  $\text{CDCl}_3$ )

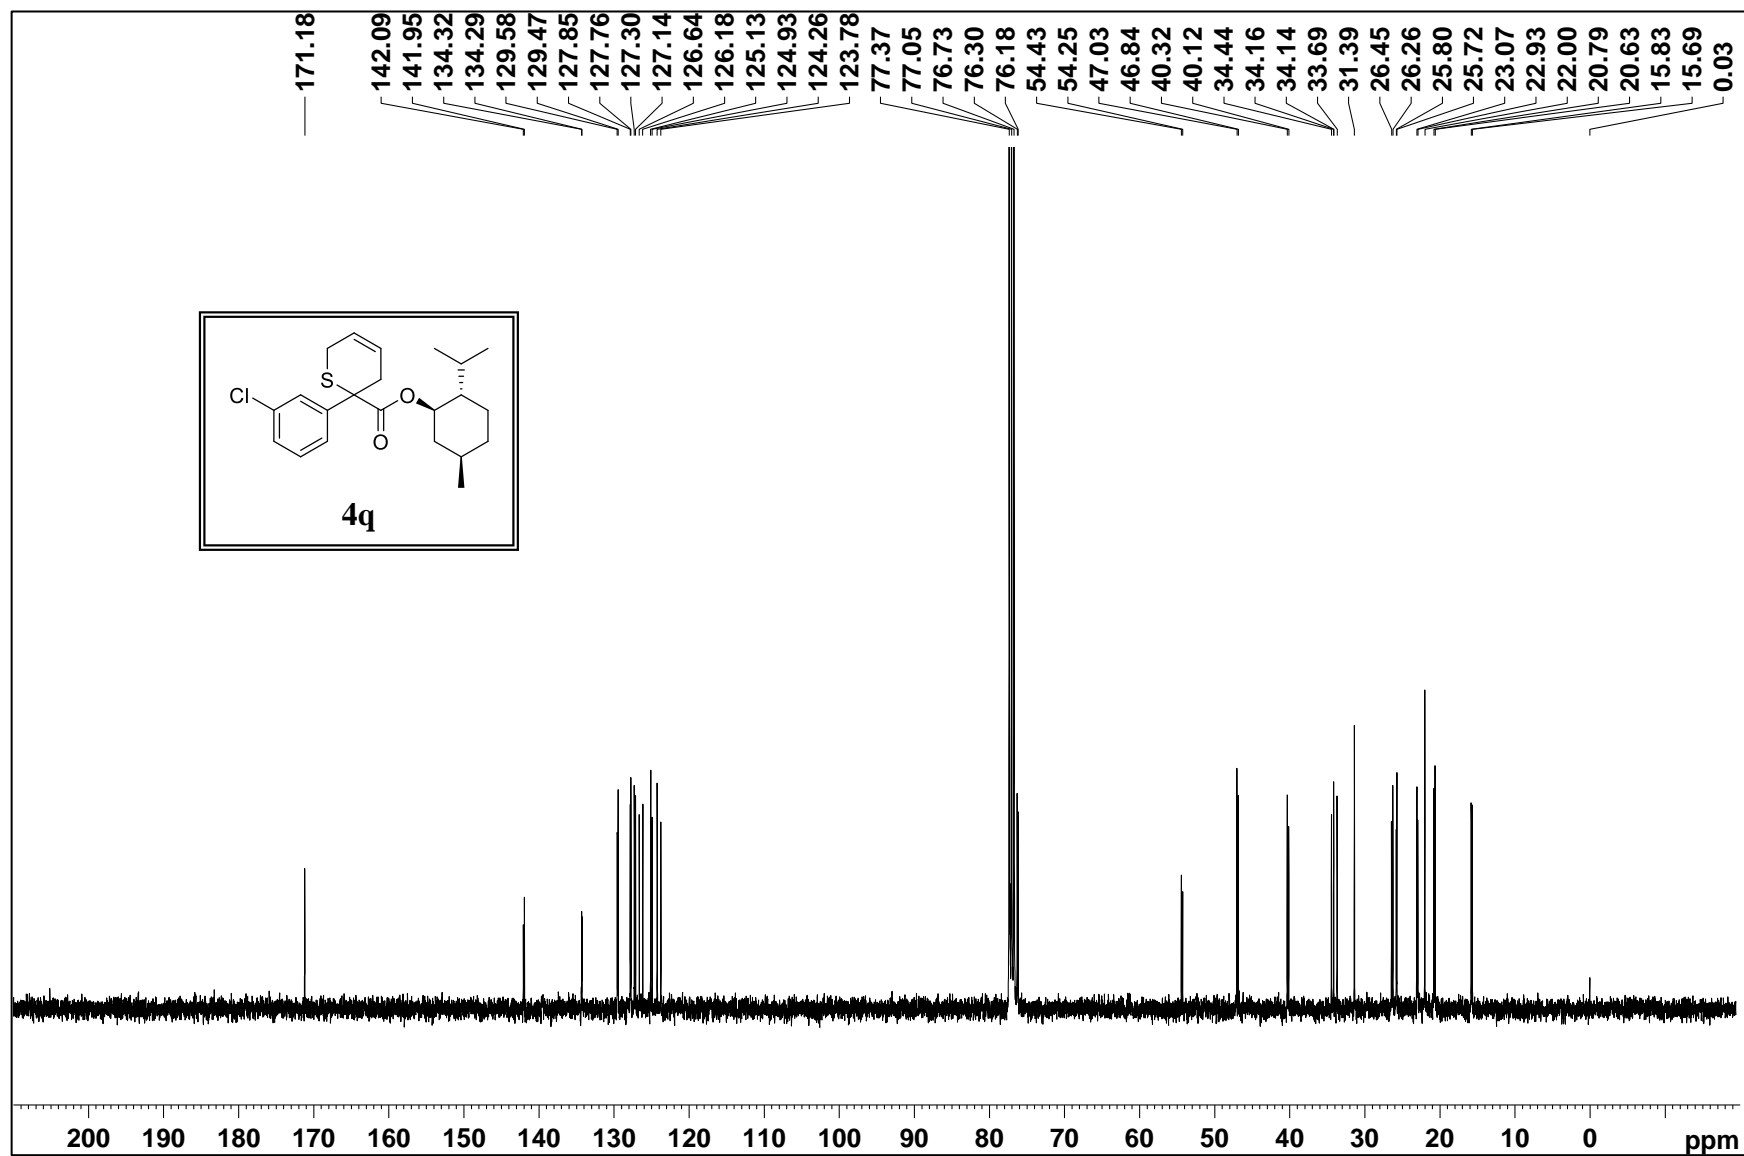

<sup>1</sup>H NMR for compound **4r** (400 MHz, CDCl<sub>3</sub>)

(data)

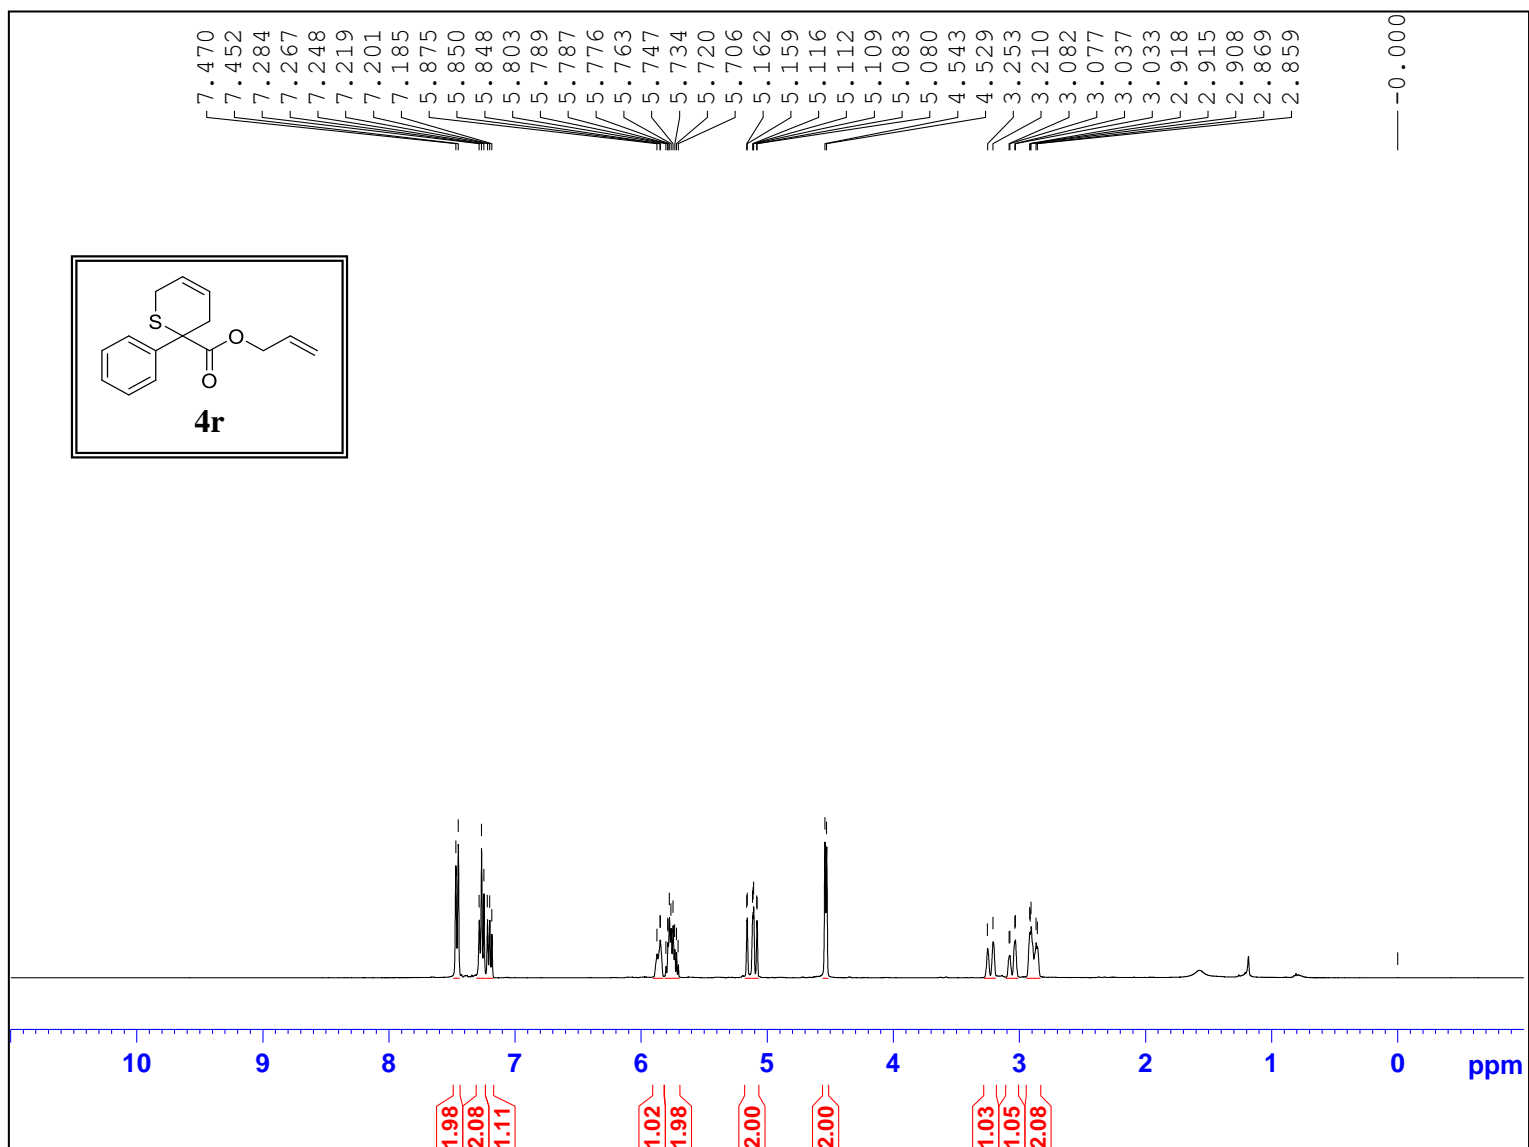

$^{13}\text{C}\{^1\text{H}\}$  NMR for compound **4r** (101 MHz,  $\text{CDCl}_3$ )

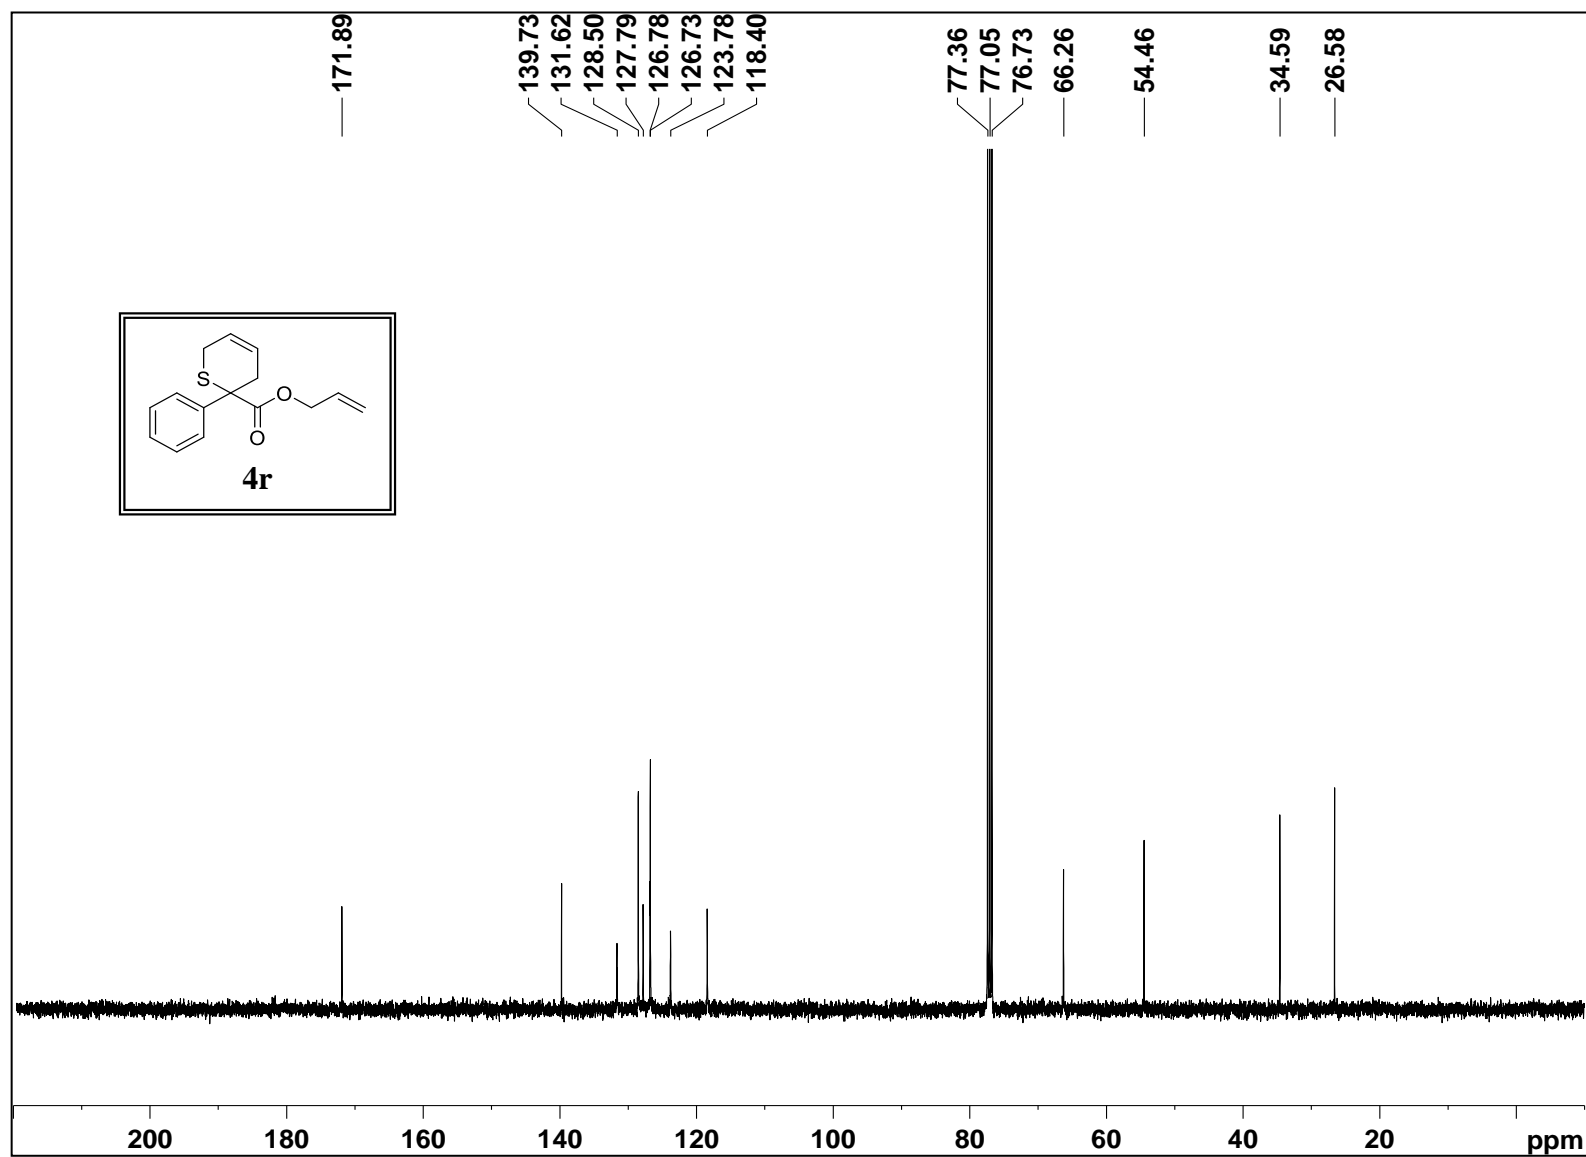

<sup>1</sup>H NMR for compound **4s** (400 MHz, CDCl<sub>3</sub>)

(data)

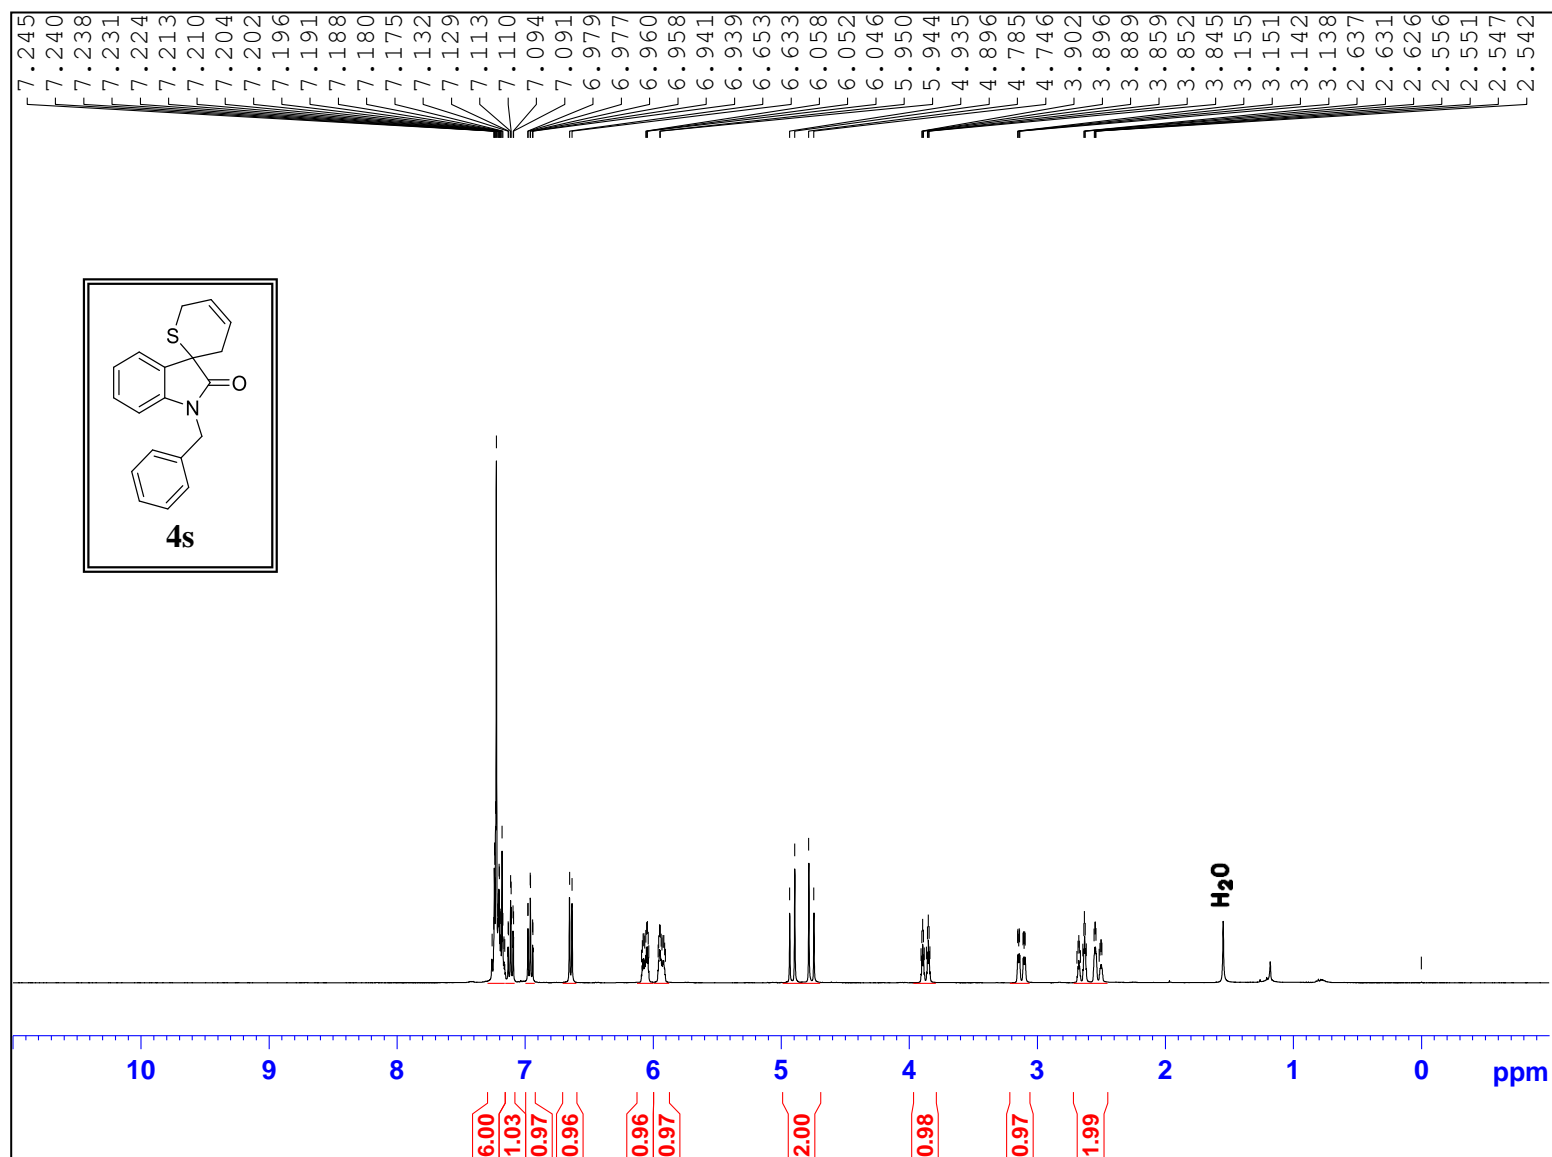



$^{13}\text{C}\{^1\text{H}\}$  NMR for compound **4s** (101 MHz,  $\text{CDCl}_3$ )

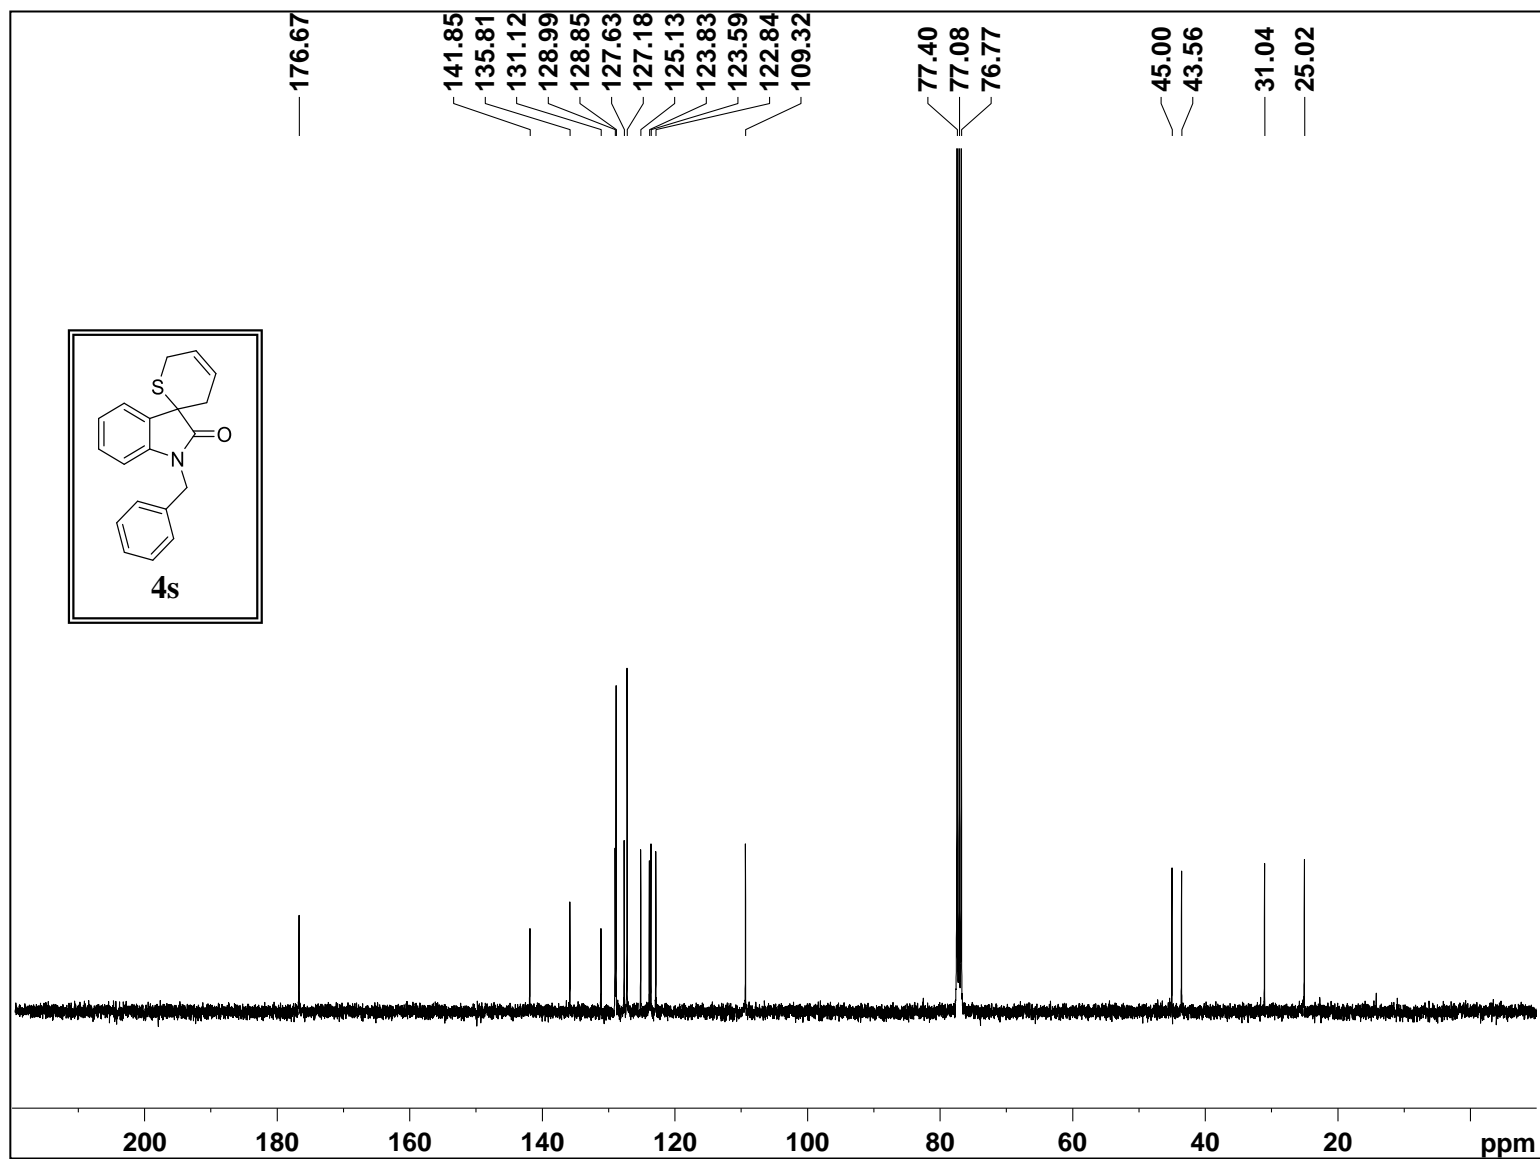

[<sup>1</sup>H, <sup>1</sup>H] COSY for compound **4s** (400 MHz, CDCl<sub>3</sub>)

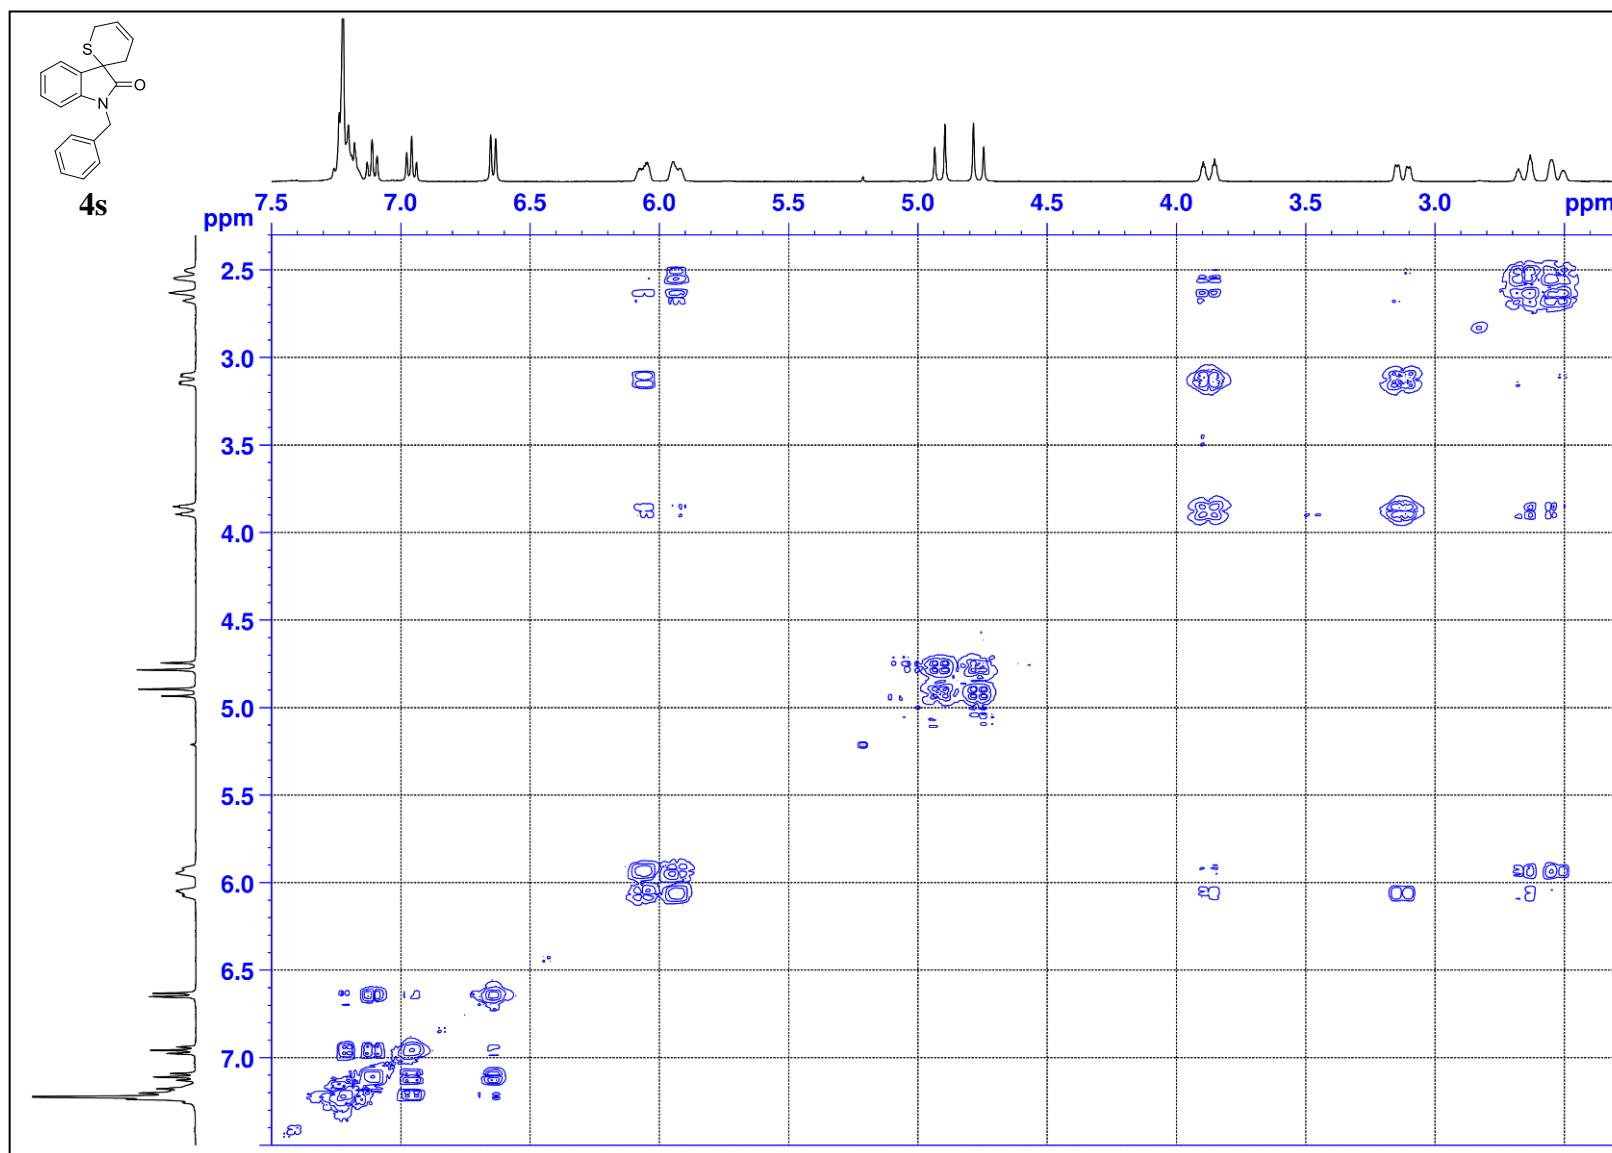

[ $^1\text{H}$ ,  $^{13}\text{C}\{^1\text{H}\}$ ] HSQC for compound **4s** (400 MHz,  $\text{CDCl}_3$ )

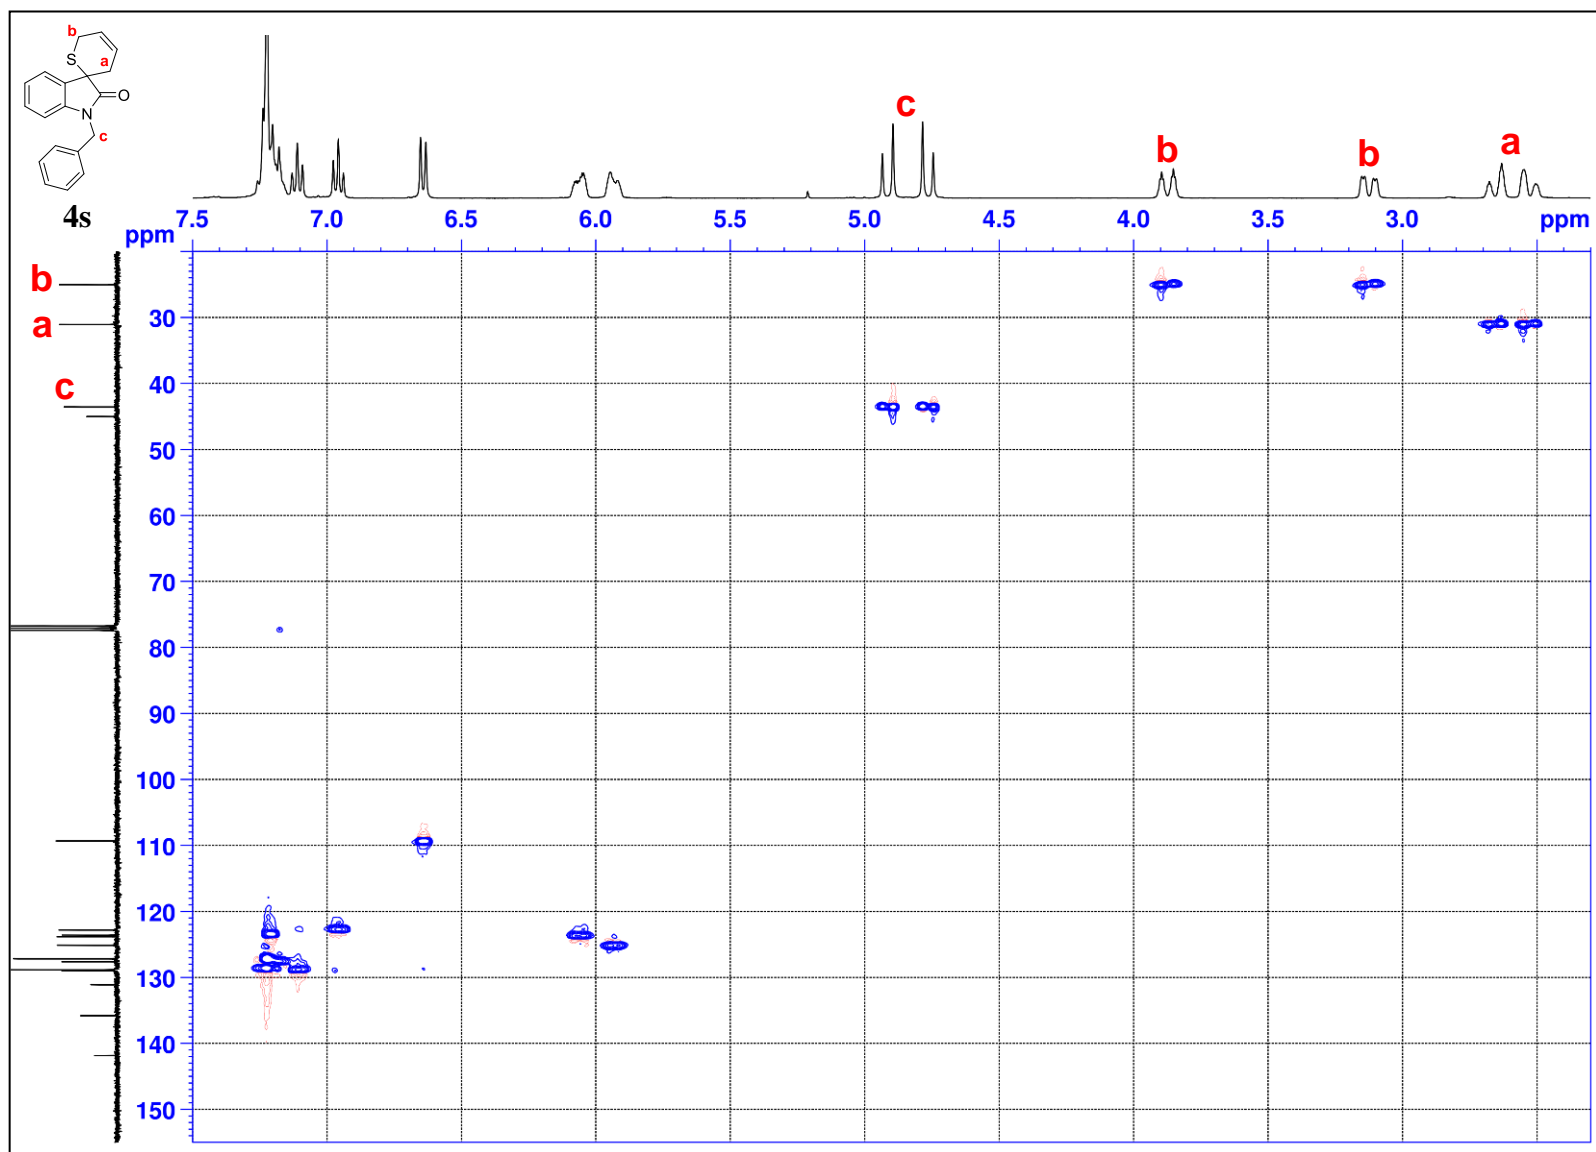

$^{13}\text{C}\{^1\text{H}\}$  DEPT-135 NMR for compound **4s** (101 MHz,  $\text{CDCl}_3$ )

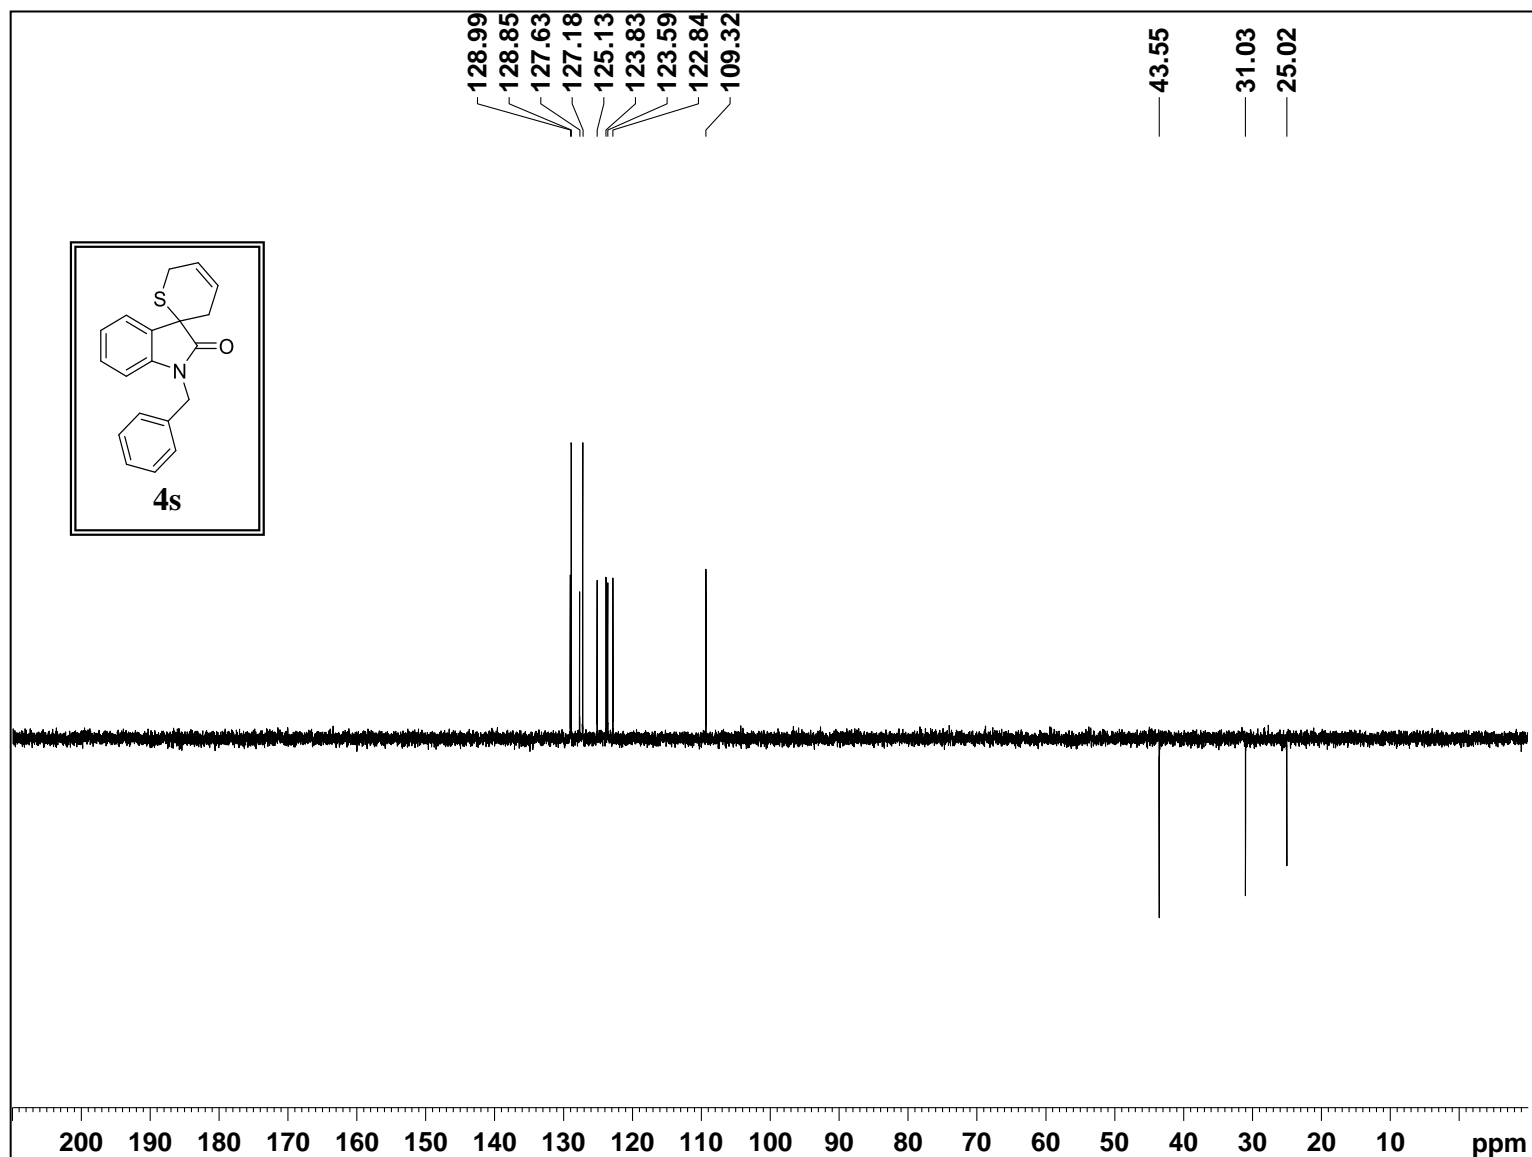

<sup>1</sup>H NMR for compound **4u<sub>1</sub>** (400 MHz, CDCl<sub>3</sub>) (data)

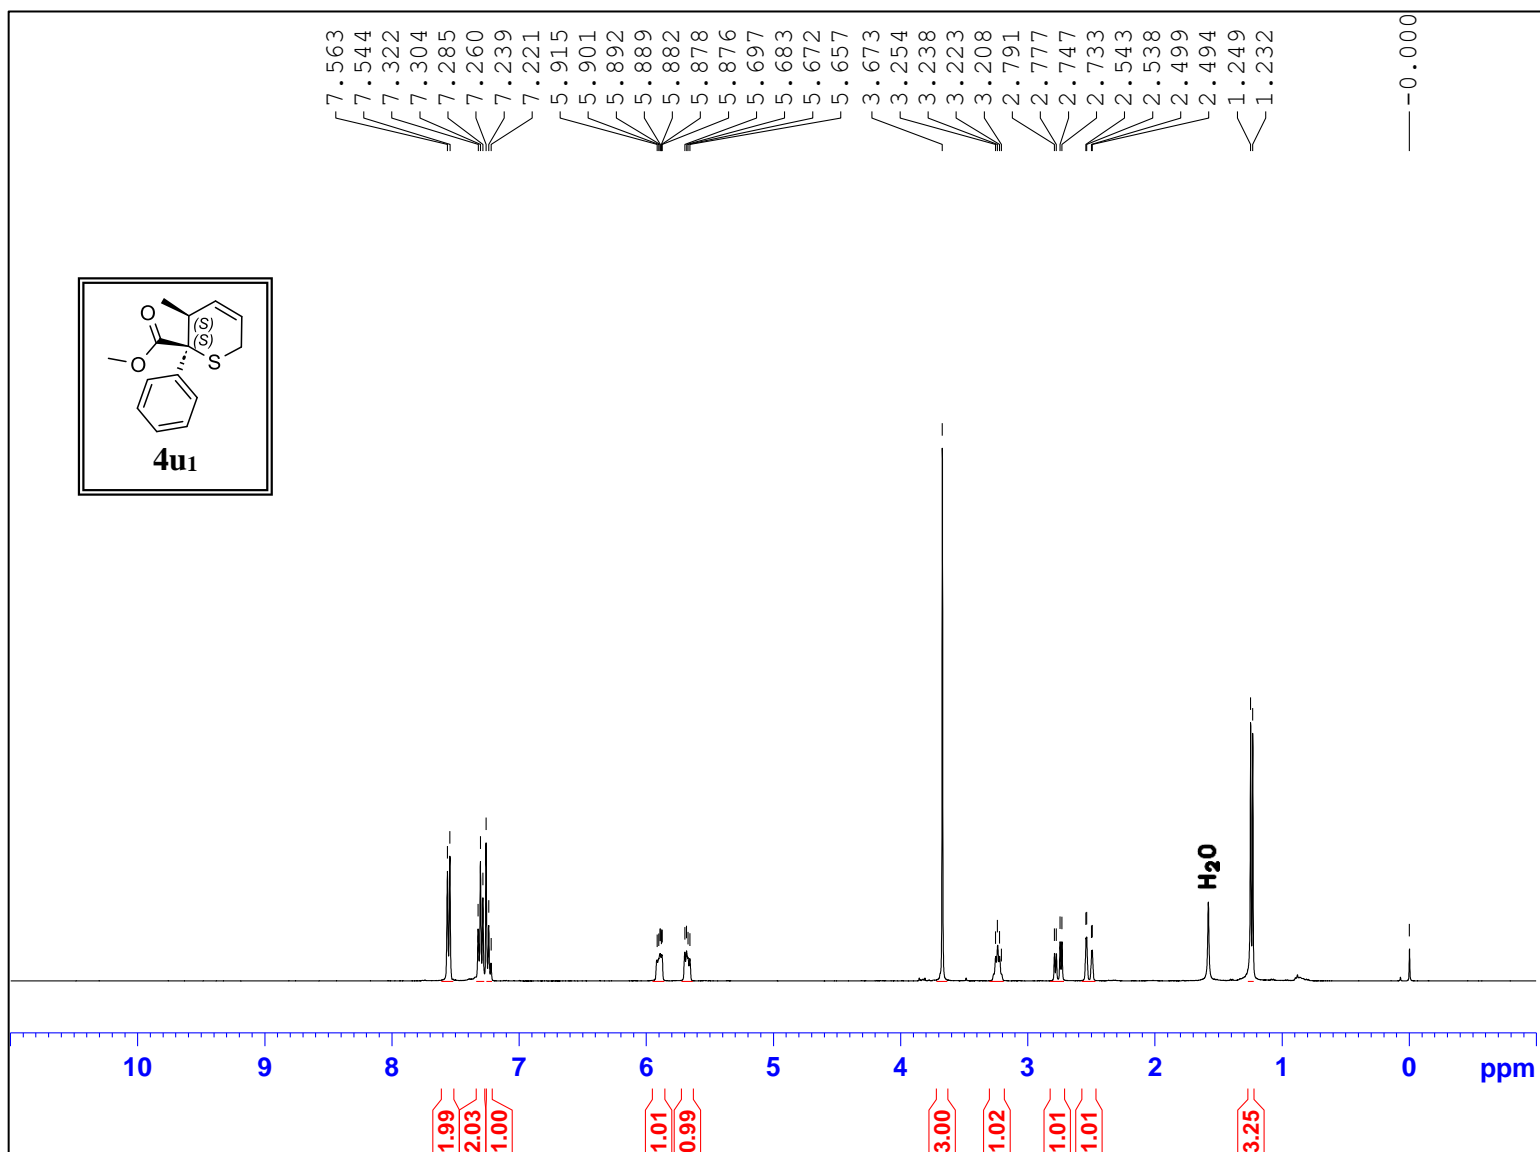

$^{13}\text{C}\{^1\text{H}\}$  NMR for compound **4u<sub>1</sub>** (101 MHz,  $\text{CDCl}_3$ )

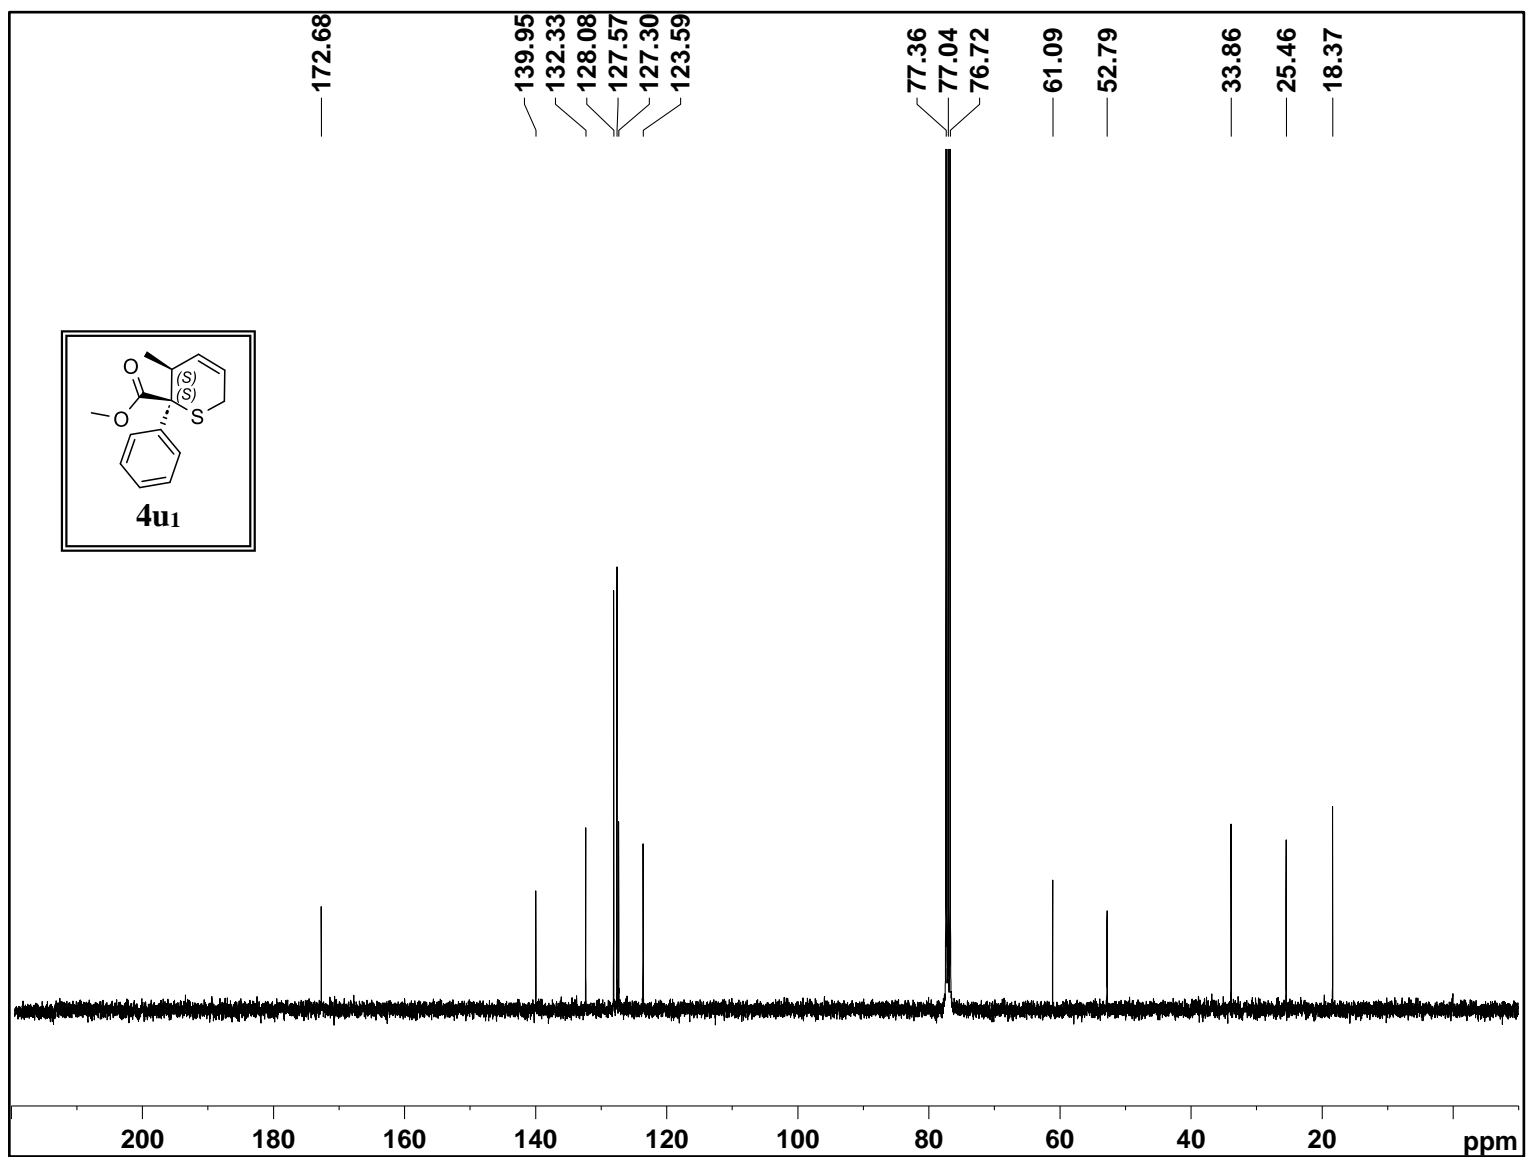

[<sup>1</sup>H, <sup>1</sup>H] COSY for compound **4u<sub>1</sub>** (400 MHz, CDCl<sub>3</sub>)

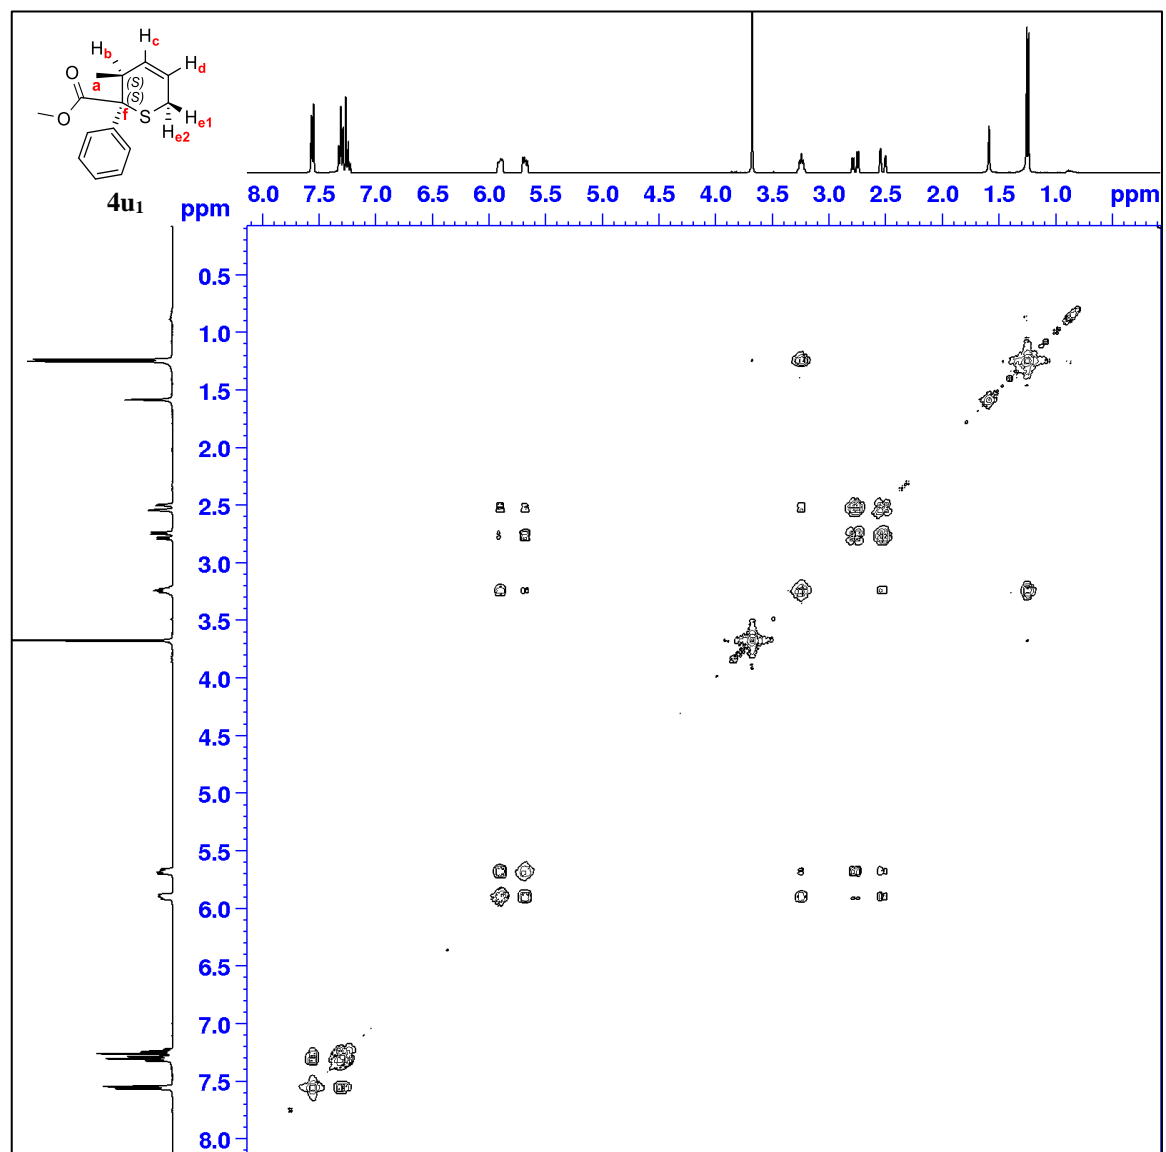

[ $^1\text{H}$ ,  $^{13}\text{C}\{^1\text{H}\}$ ] HSQC for compound **4u<sub>1</sub>** (400 MHz,  $\text{CDCl}_3$ )

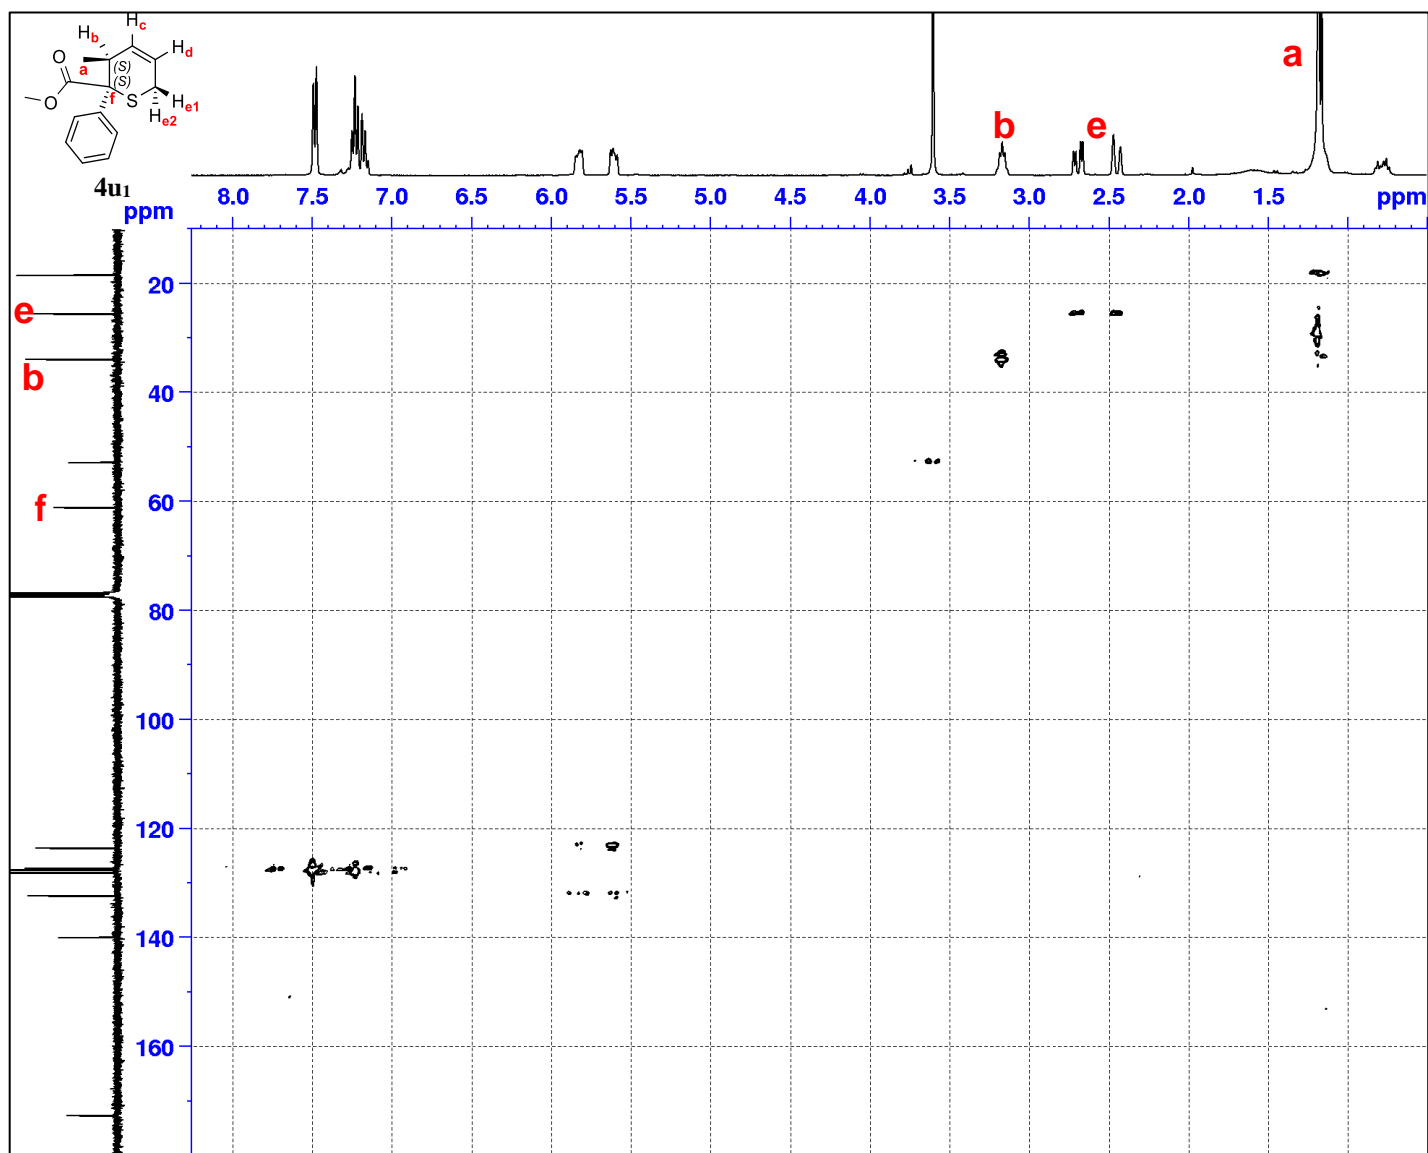



[<sup>1</sup>H, <sup>13</sup>C{<sup>1</sup>H}] HMBC for compound **4u<sub>1</sub>** (400 MHz, CDCl<sub>3</sub>)

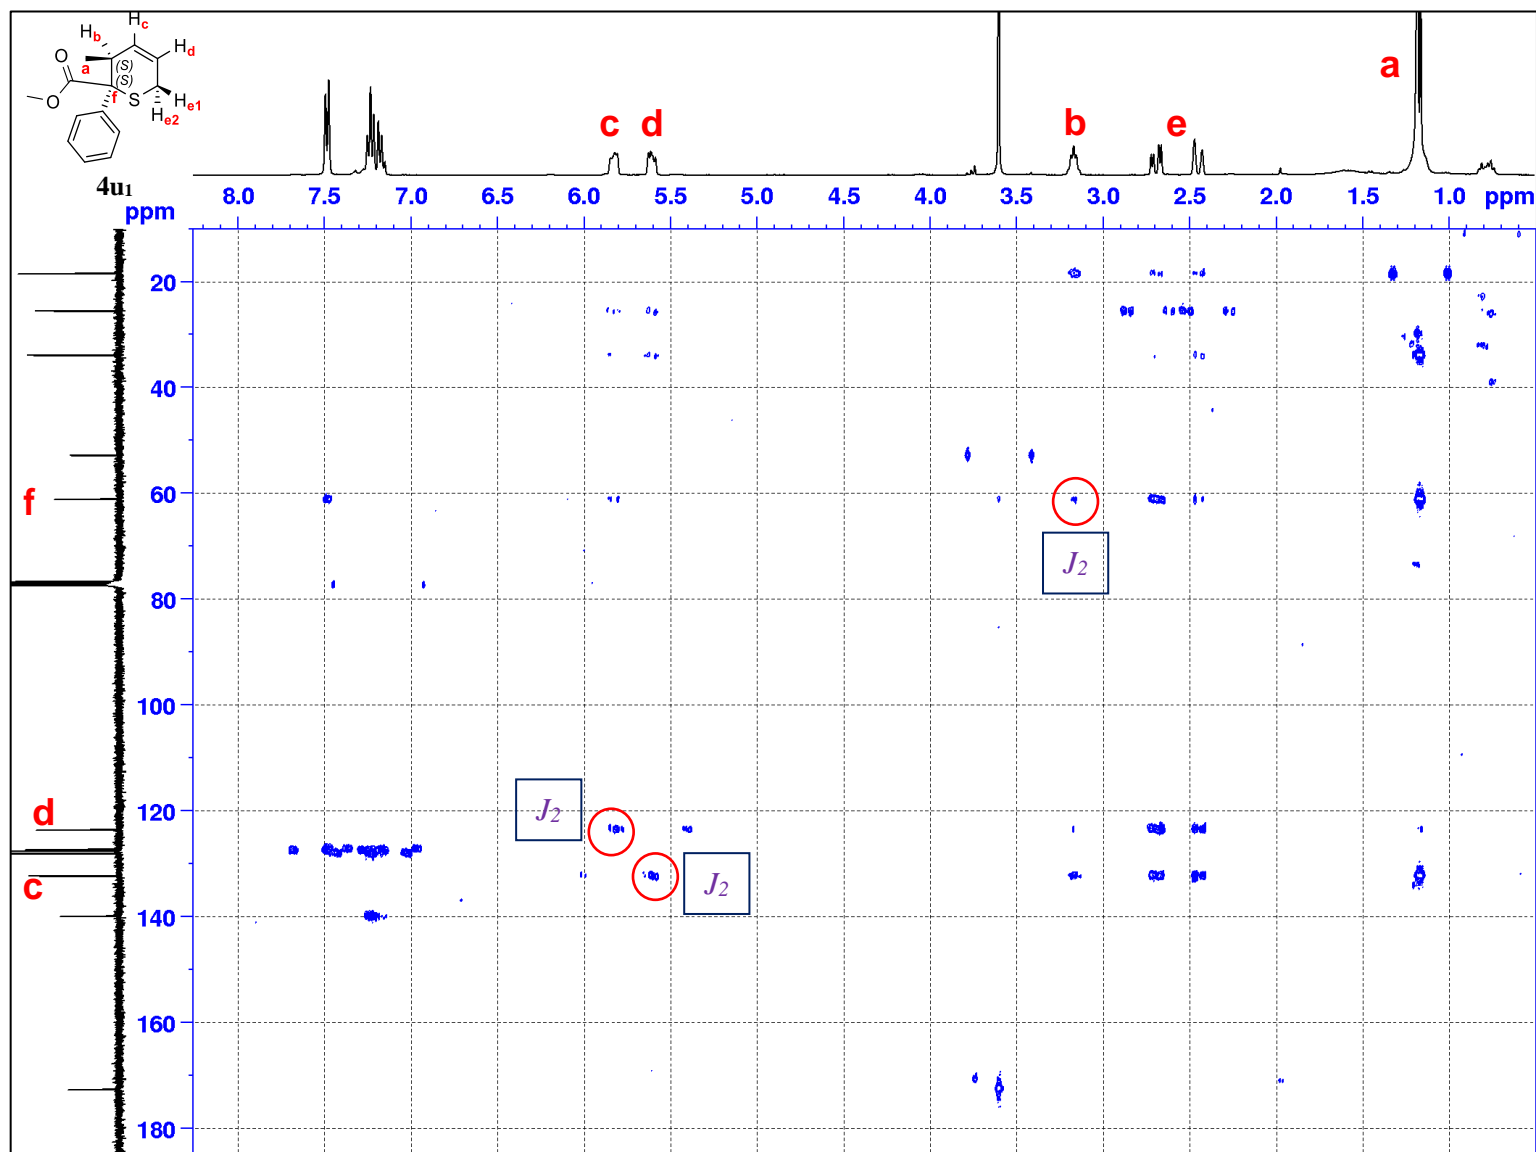

[<sup>1</sup>H, <sup>1</sup>H] NOESY for compound **4u<sub>1</sub>** (400 MHz, CDCl<sub>3</sub>)

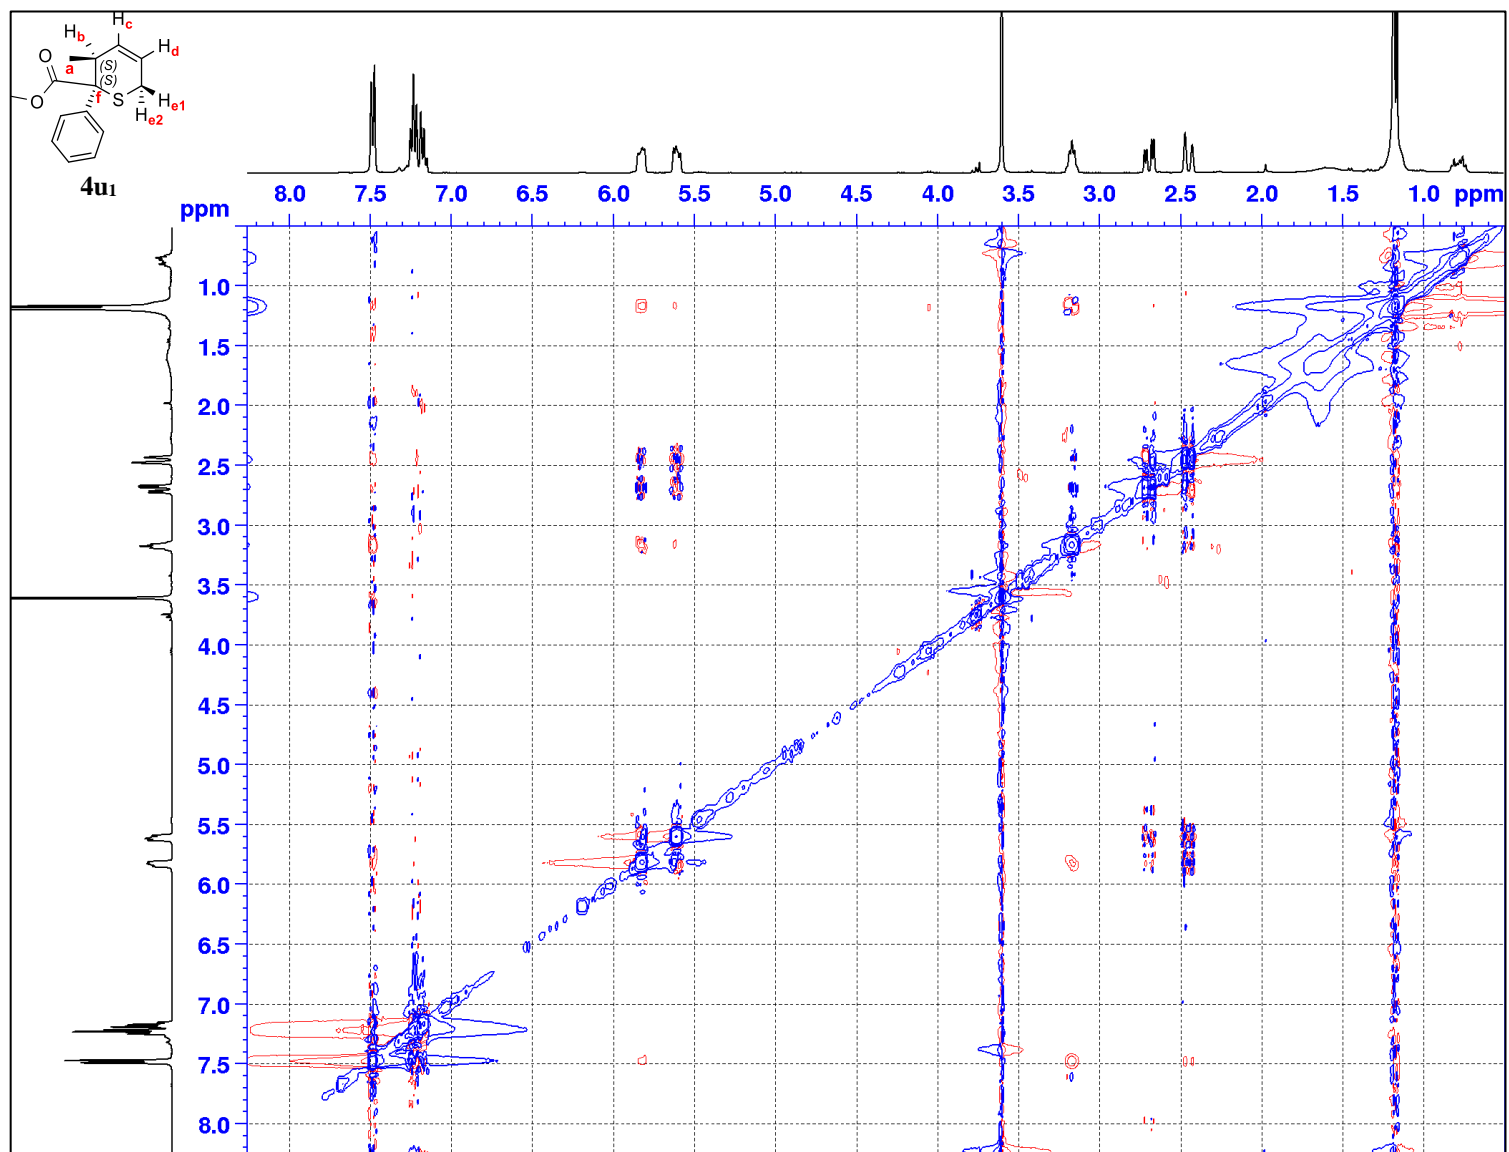

[<sup>1</sup>H, <sup>1</sup>H] SELNOGP (1D NOE) for compound **4u<sub>1</sub>** (400 MHz, CDCl<sub>3</sub>)

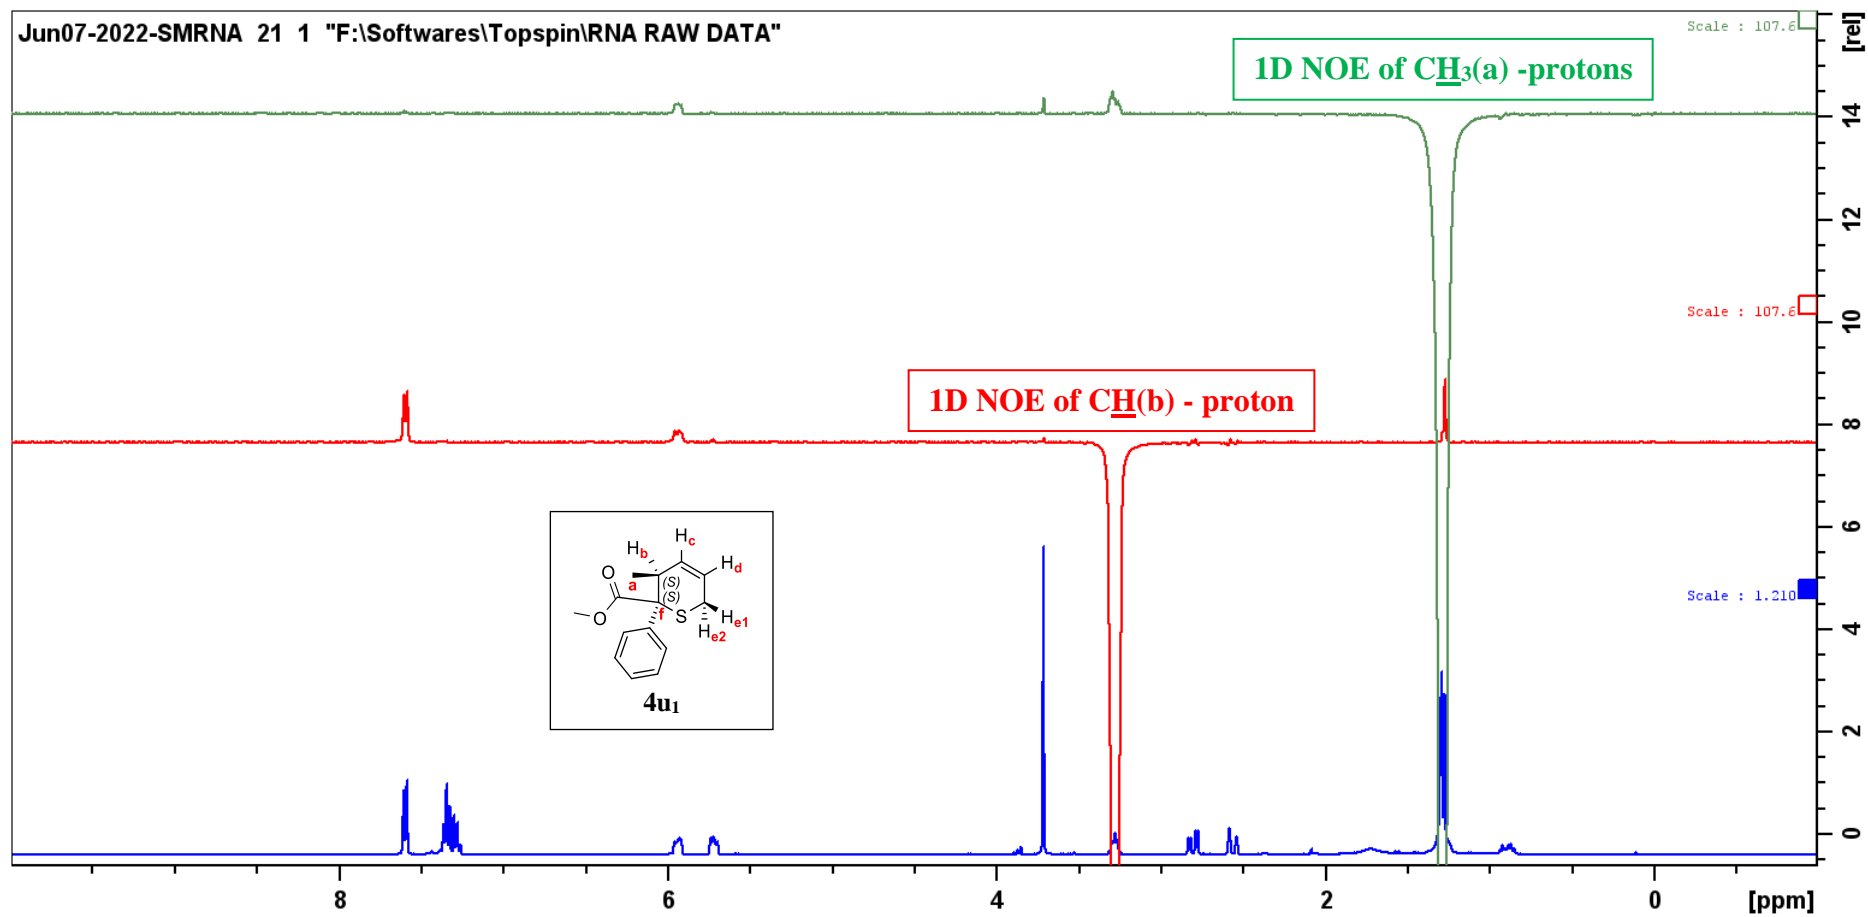

$^{13}\text{C}\{^1\text{H}\}$  DEPT-135 NMR for compound **4u<sub>1</sub>** (101 MHz,  $\text{CDCl}_3$ )

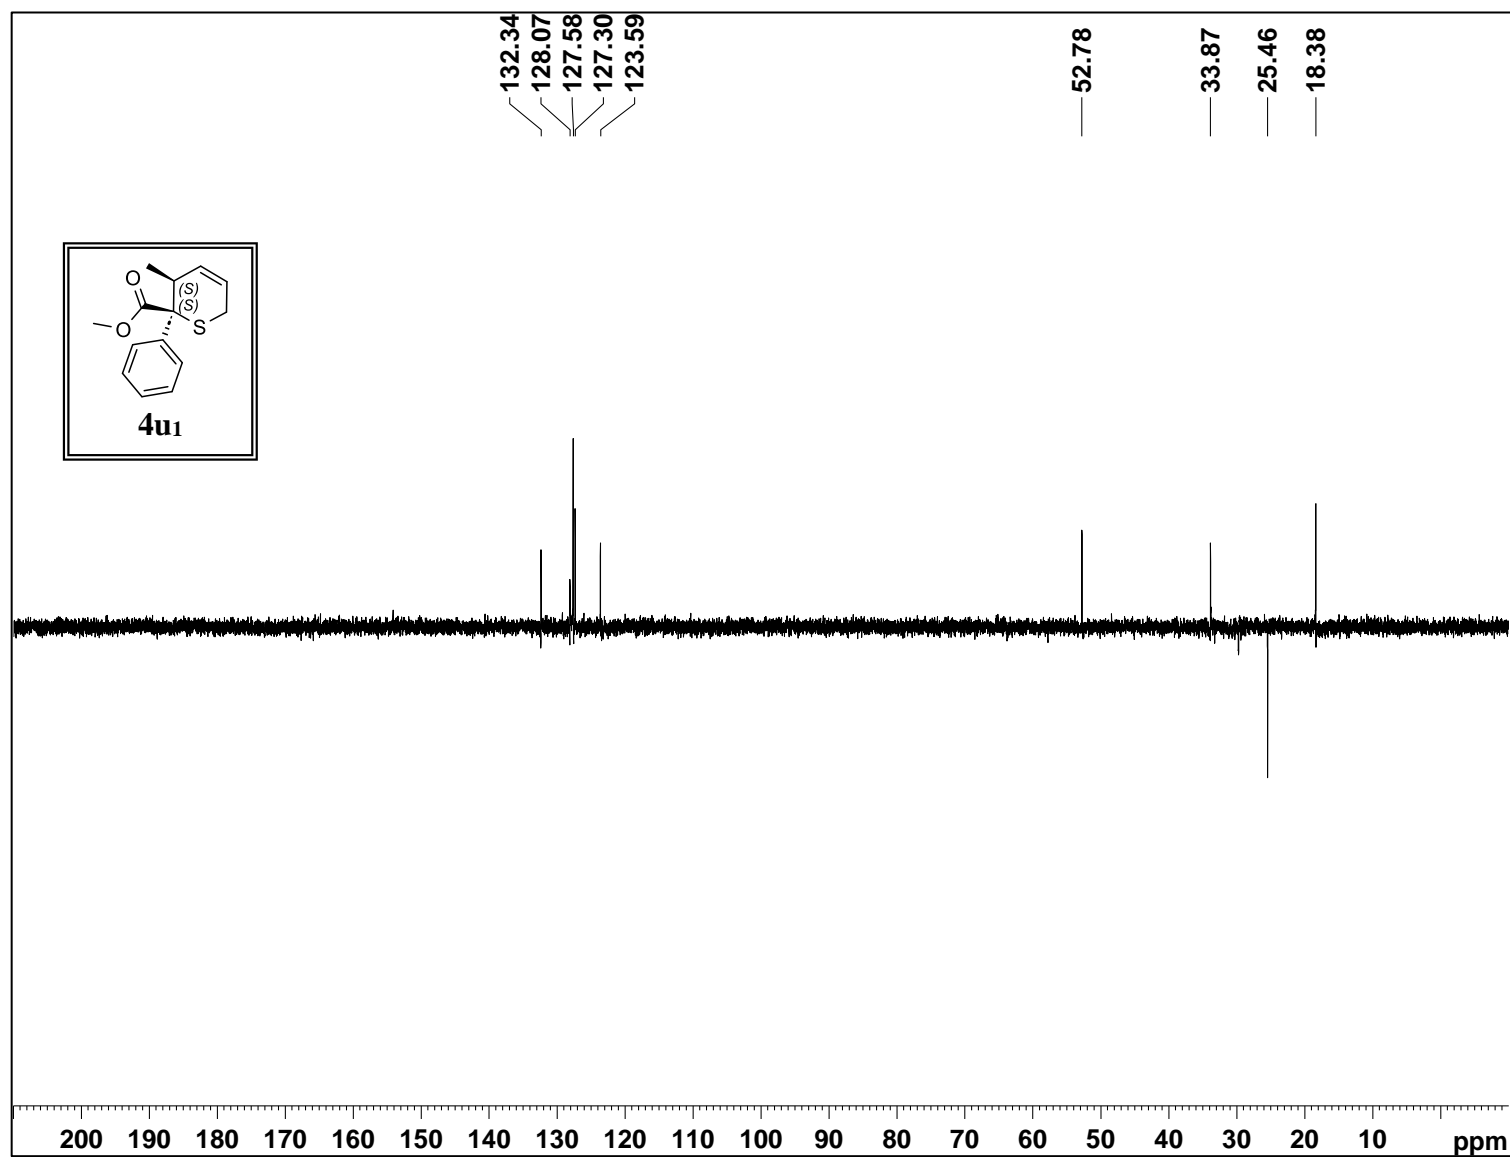

<sup>1</sup>H NMR for compound **4u<sub>2</sub>** (400 MHz, CDCl<sub>3</sub>)

(data)

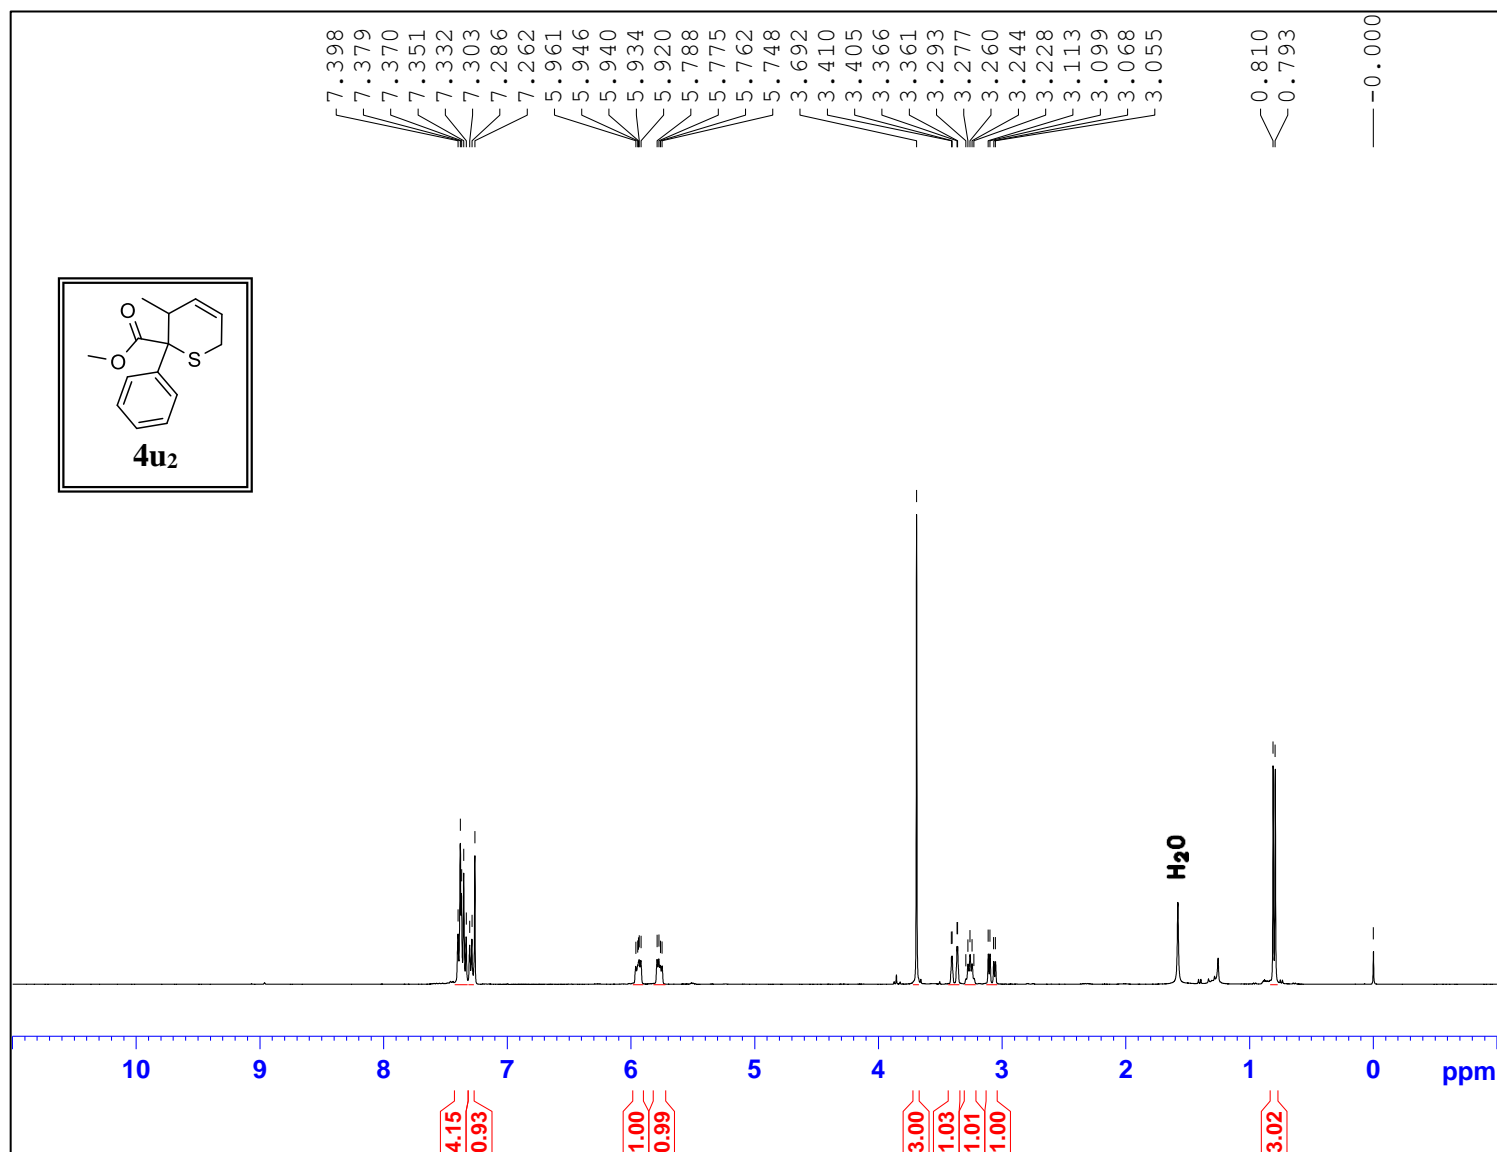

$^{13}\text{C}\{^1\text{H}\}$  NMR for compound **4u<sub>2</sub>** (101 MHz,  $\text{CDCl}_3$ )

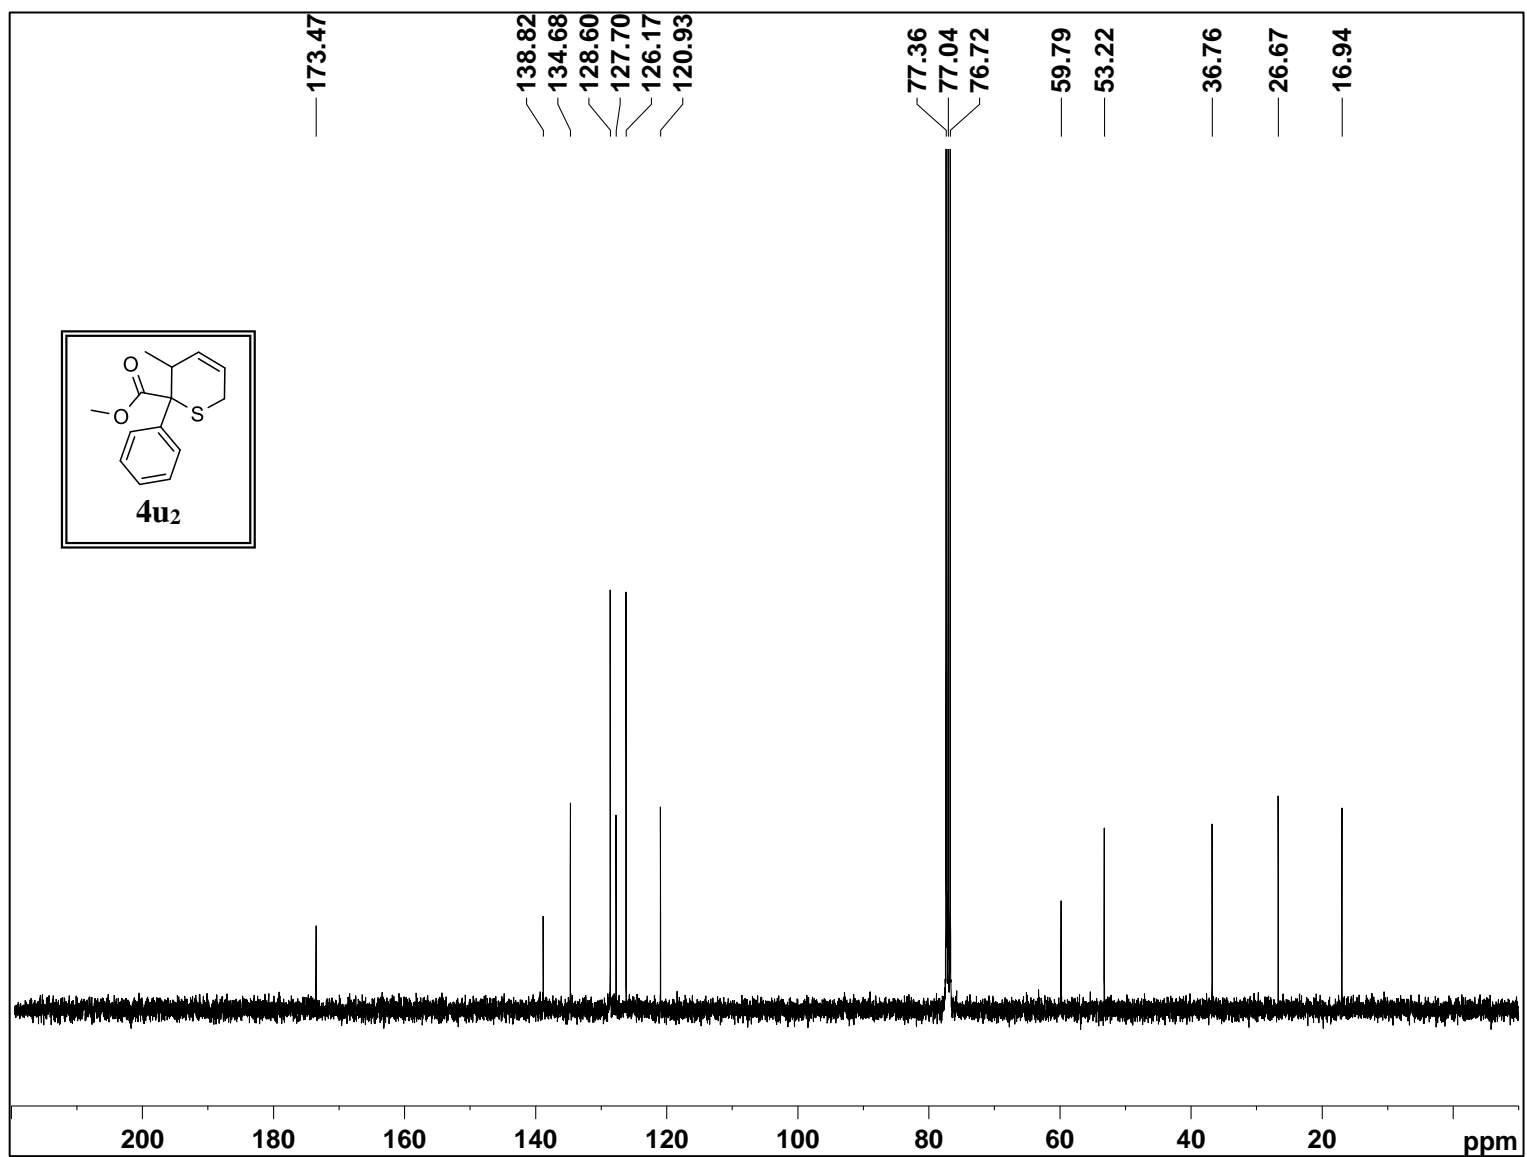

[<sup>1</sup>H, <sup>1</sup>H] COSY for compound **4u<sub>2</sub>** (400 MHz, CDCl<sub>3</sub>)

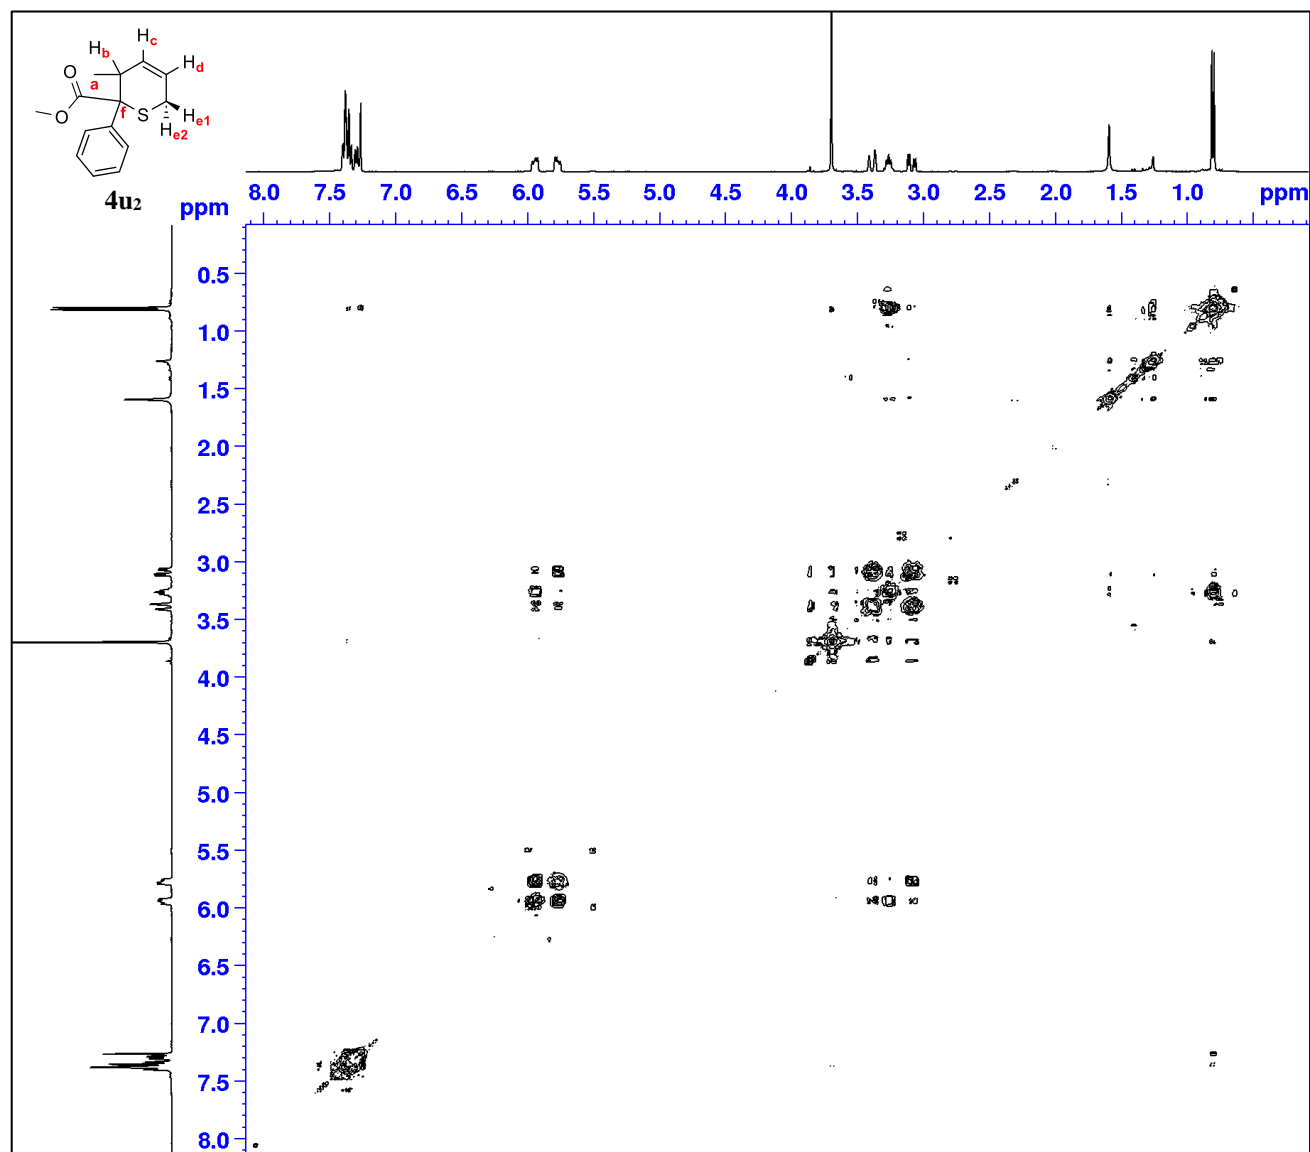

[ $^1\text{H}$ ,  $^{13}\text{C}\{^1\text{H}\}$ ] HSQC for compound **4u<sub>2</sub>** (400 MHz,  $\text{CDCl}_3$ )

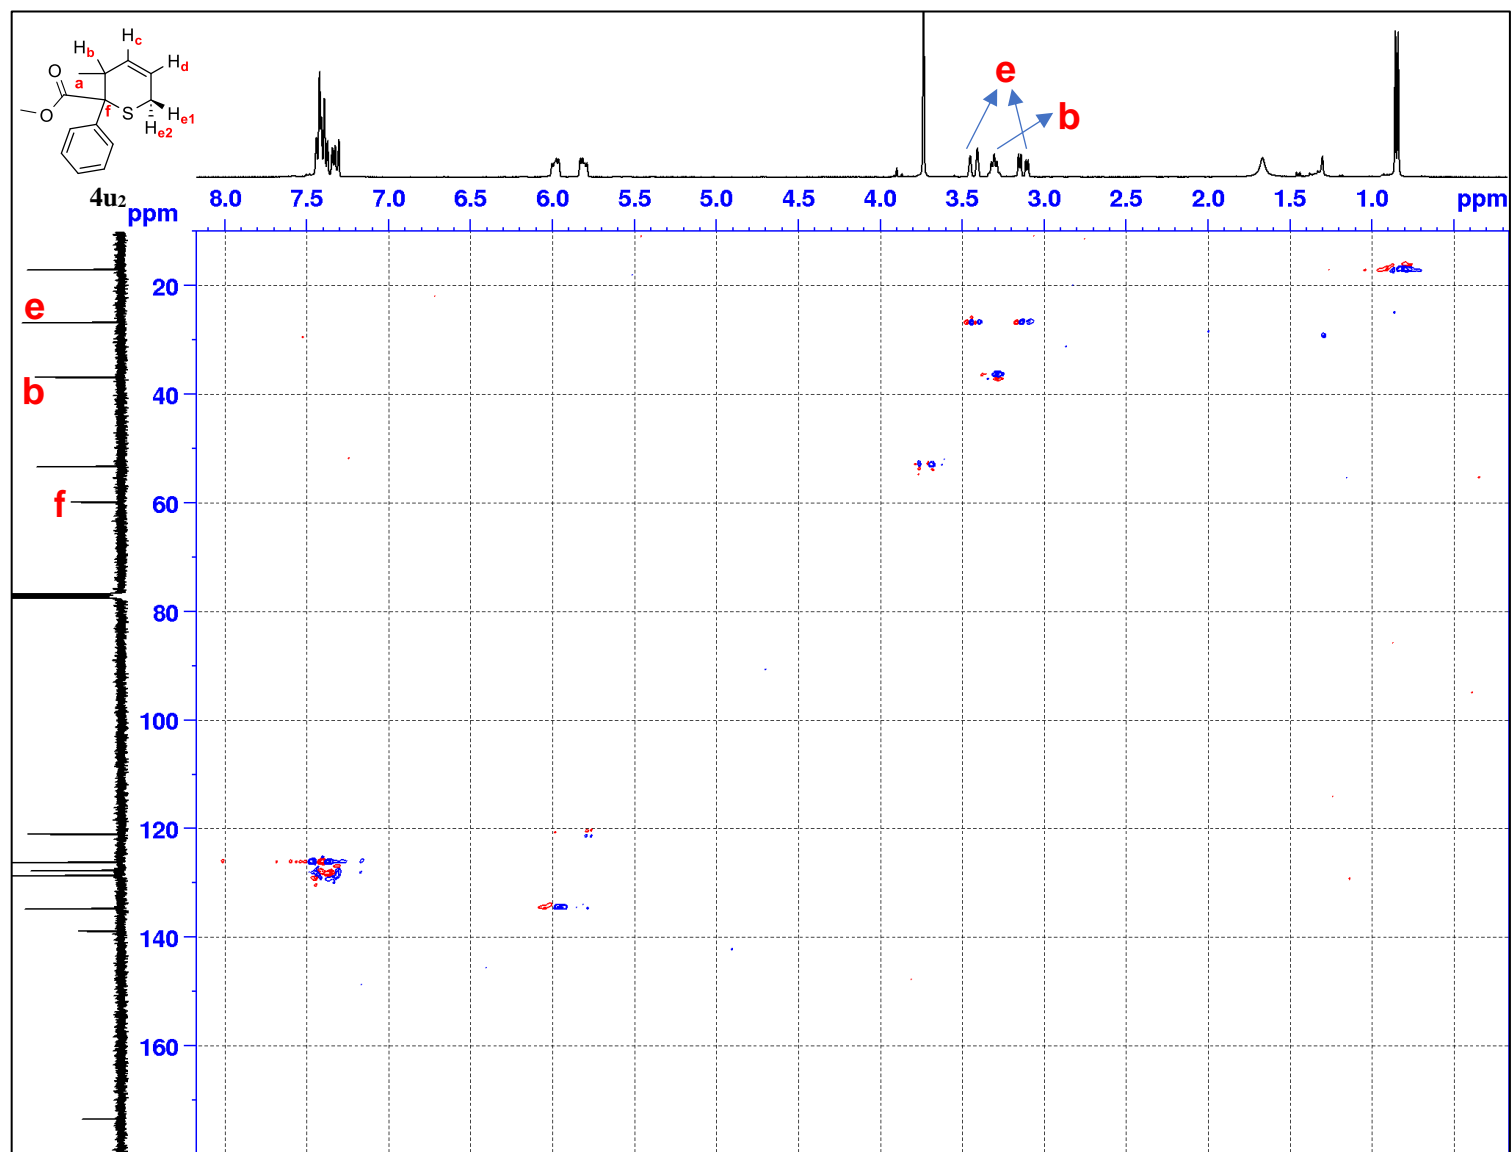



[<sup>1</sup>H, <sup>13</sup>C{<sup>1</sup>H}] HMBC for compound **4u<sub>2</sub>** (400 MHz, CDCl<sub>3</sub>)

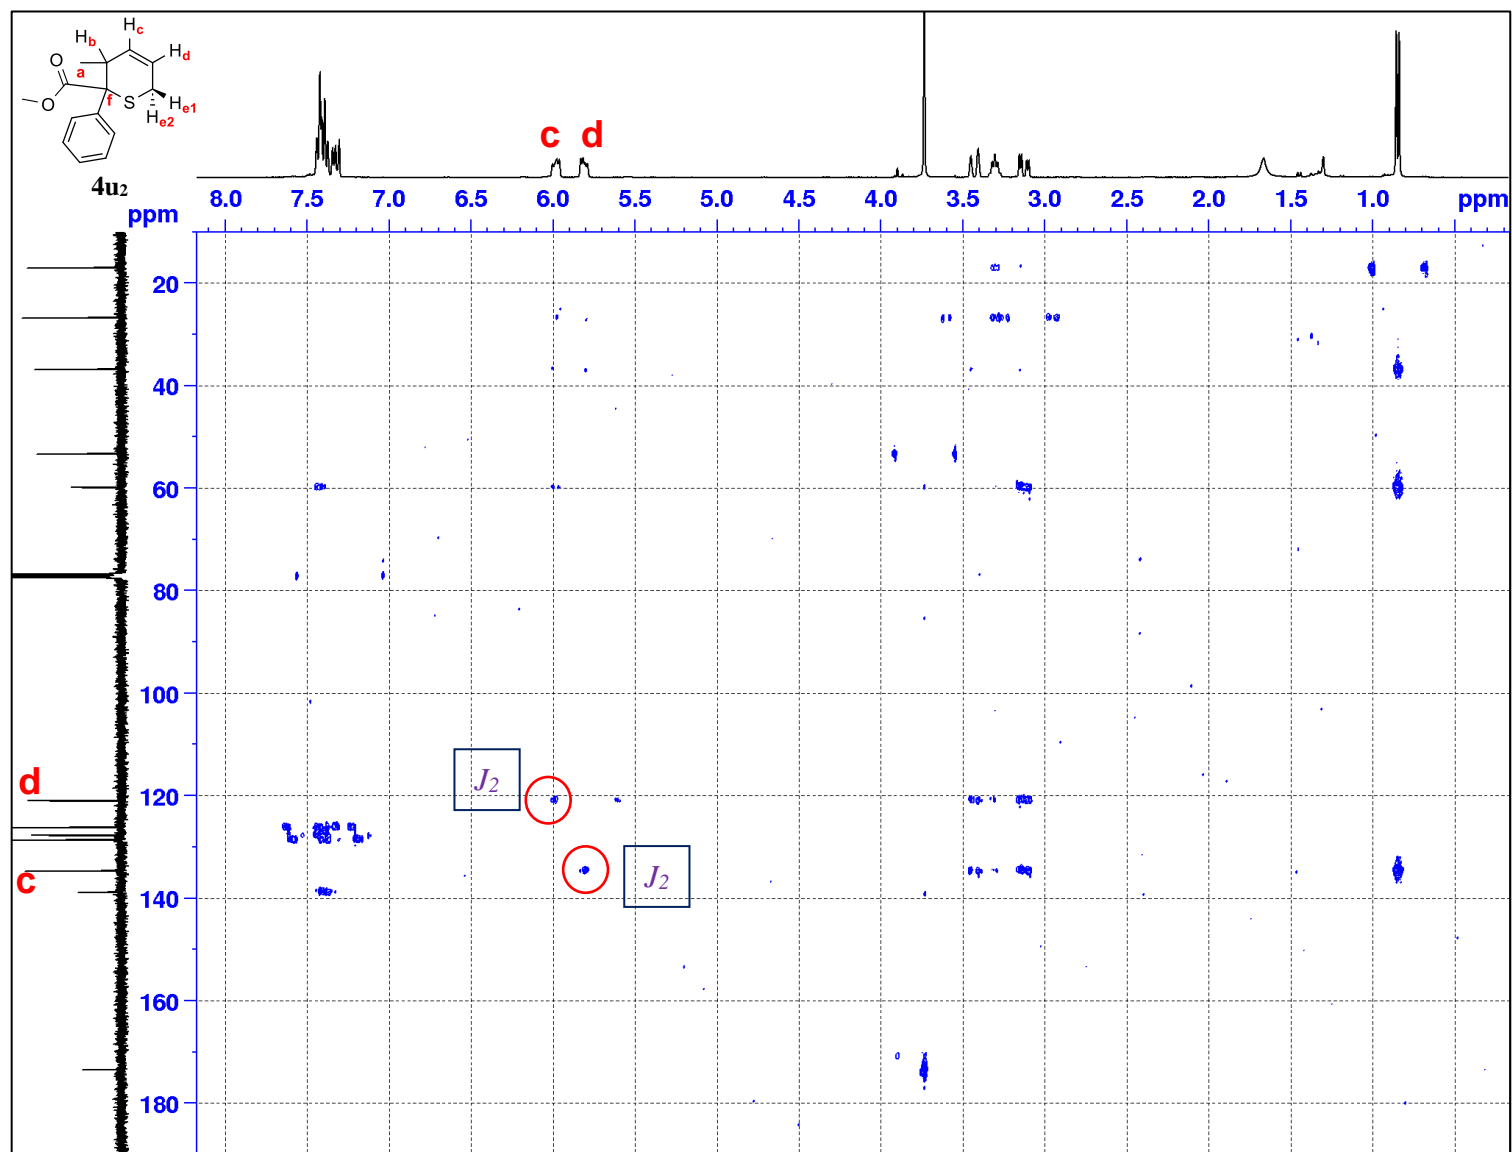

[<sup>1</sup>H, <sup>1</sup>H] NOESY for compound **4u<sub>2</sub>** (400 MHz, CDCl<sub>3</sub>)

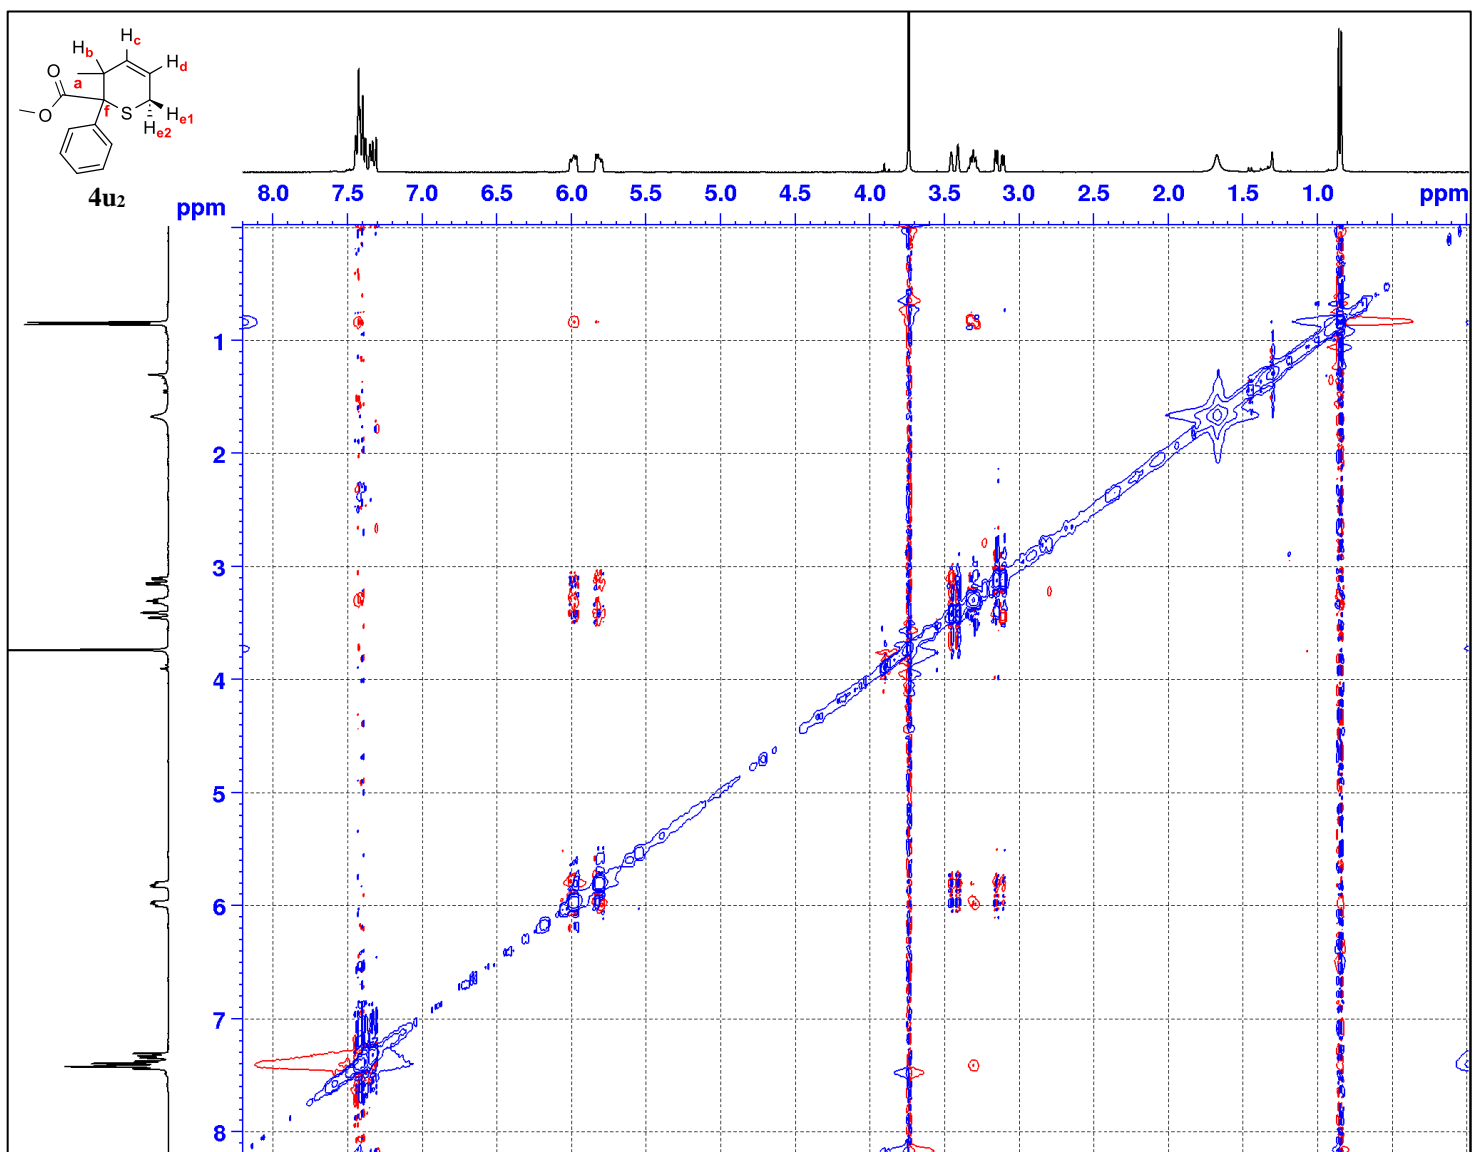

[<sup>1</sup>H, <sup>1</sup>H] SELNOGP (1D NOE) for compound **4u<sub>2</sub>** (400 MHz, CDCl<sub>3</sub>)

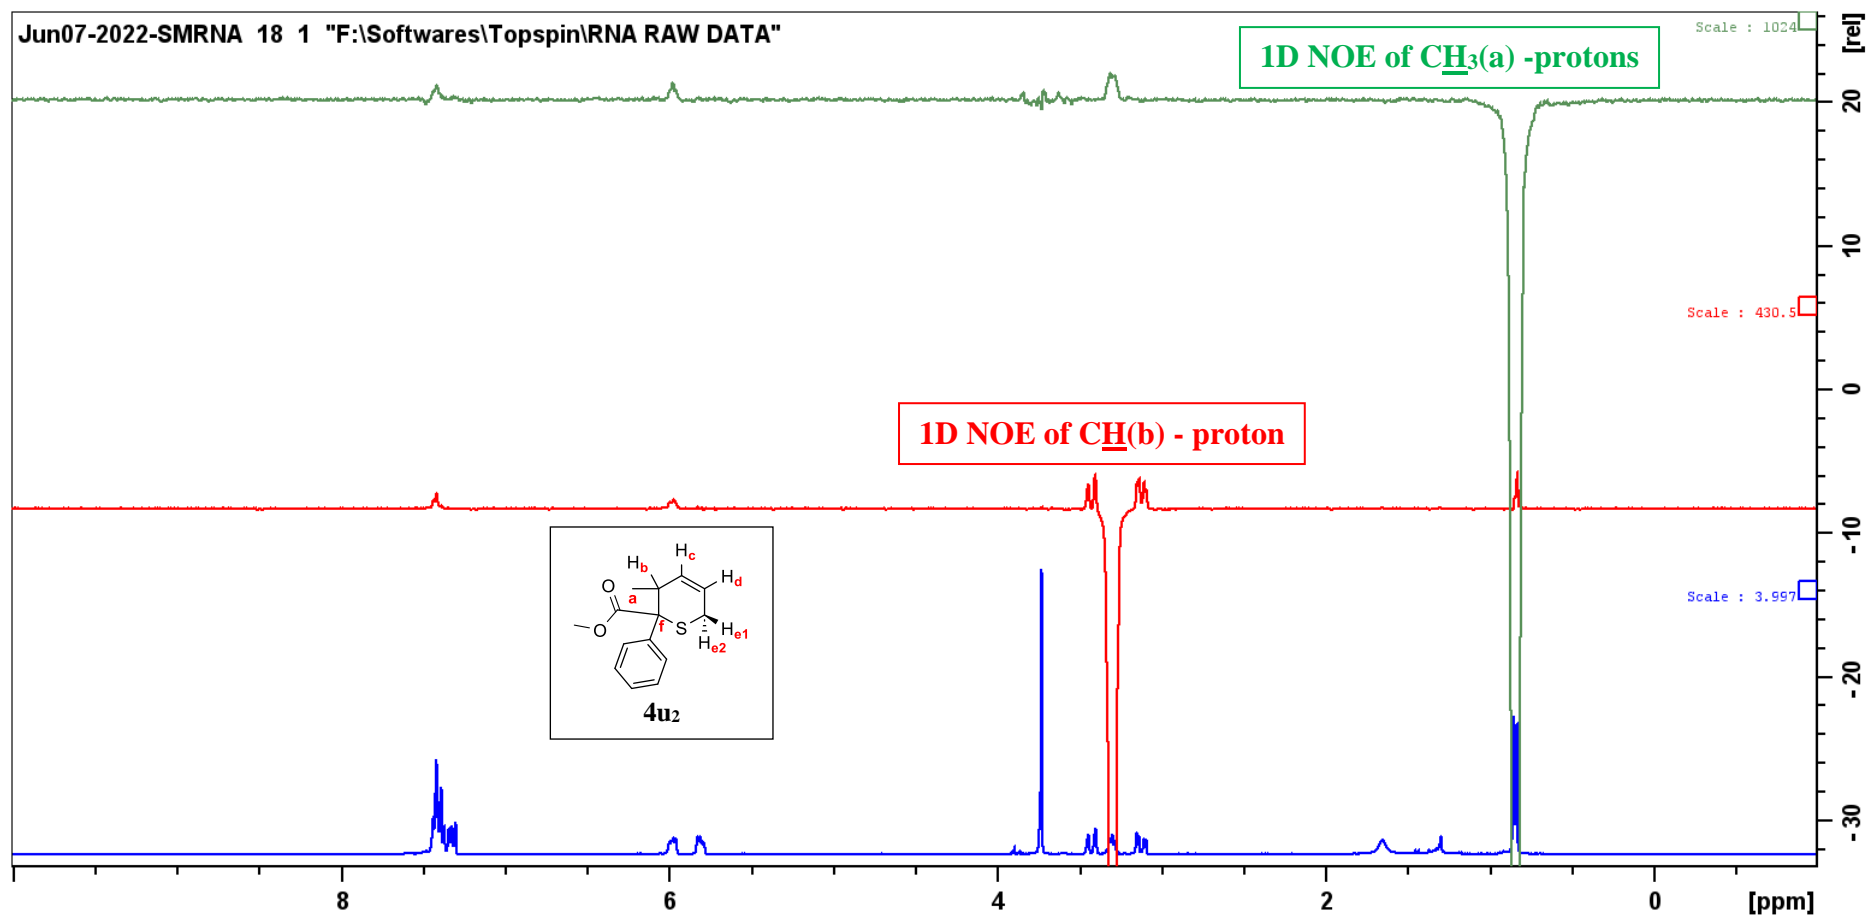

$^{13}\text{C}\{^1\text{H}\}$  DEPT-135 NMR for compound **4u<sub>2</sub>** (101 MHz,  $\text{CDCl}_3$ )

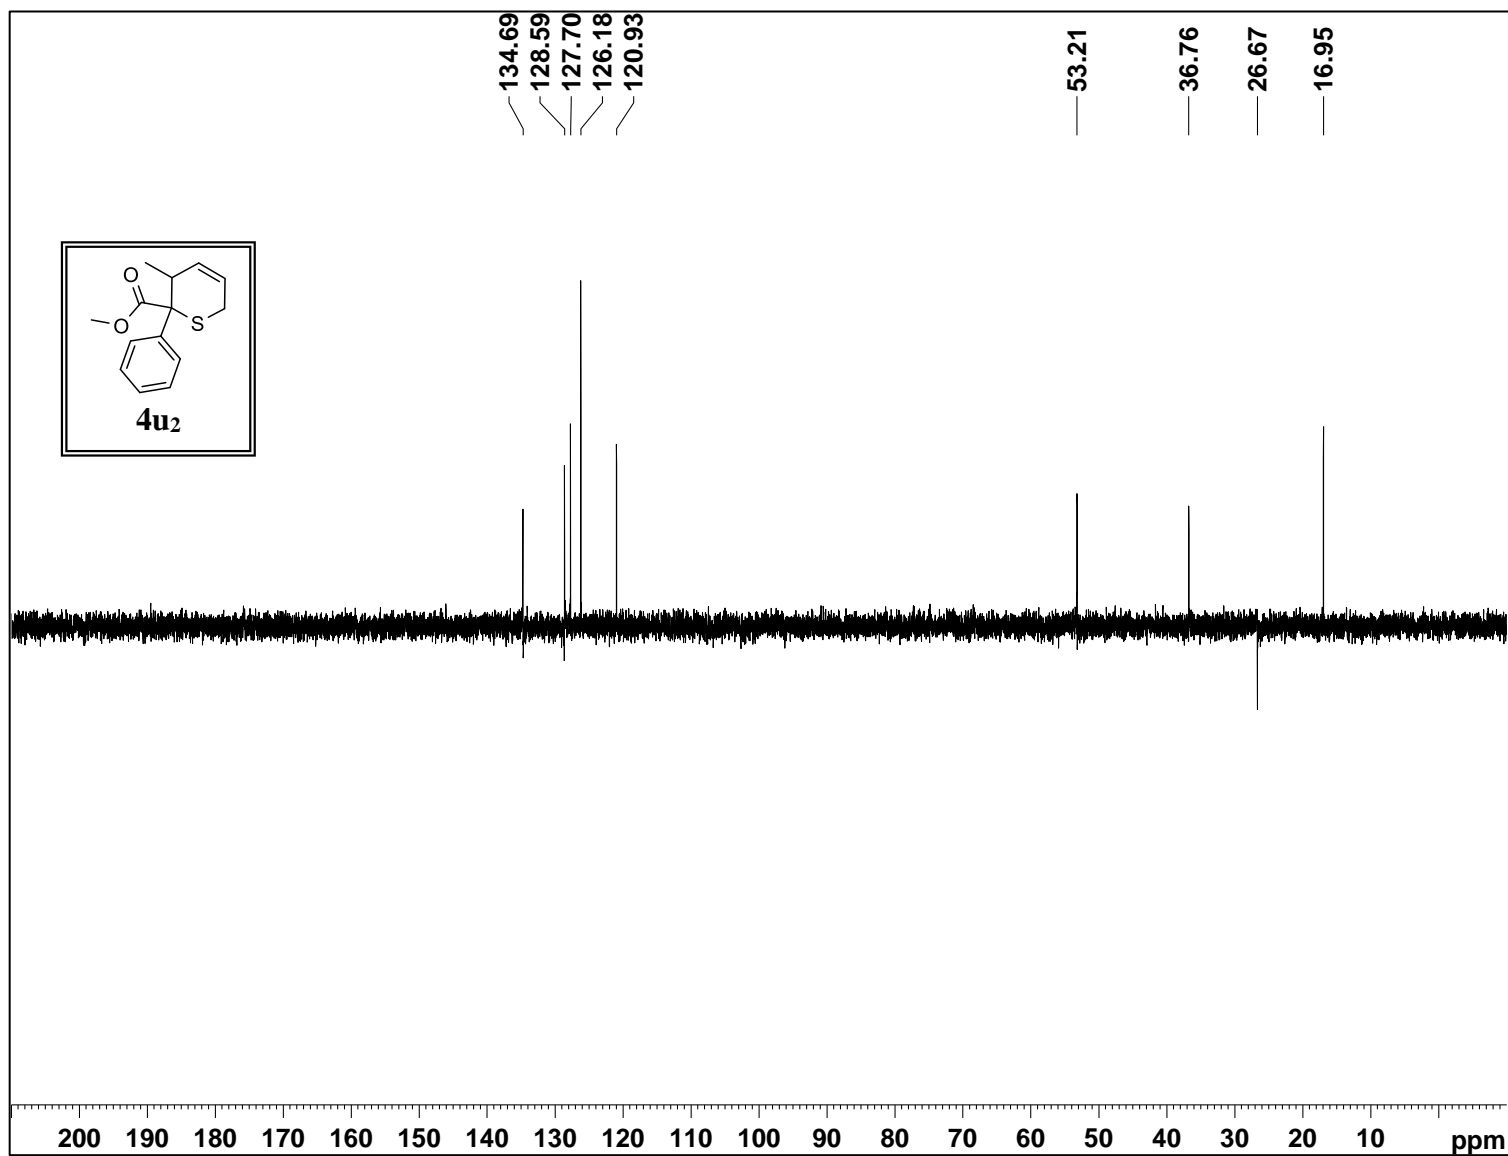

<sup>1</sup>H NMR for compound **6a** (400 MHz, CDCl<sub>3</sub>) (data)

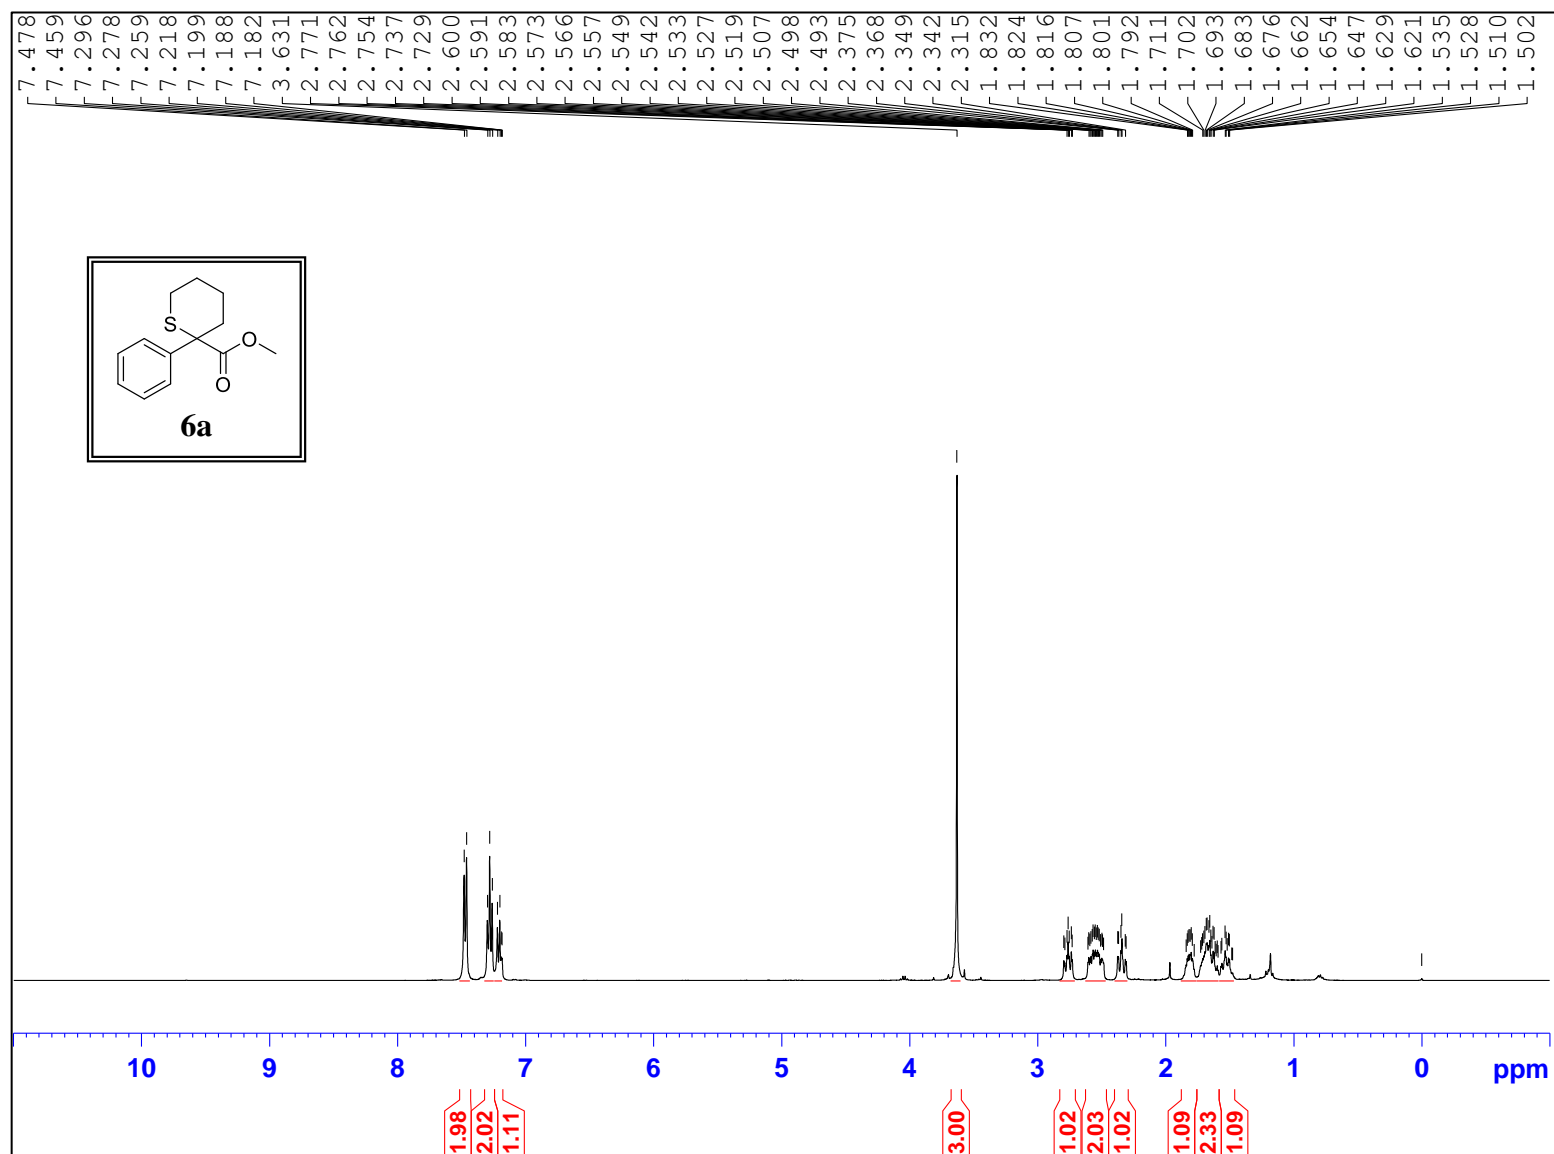

$^{13}\text{C}\{^1\text{H}\}$  NMR for compound **6a** (101 MHz,  $\text{CDCl}_3$ )

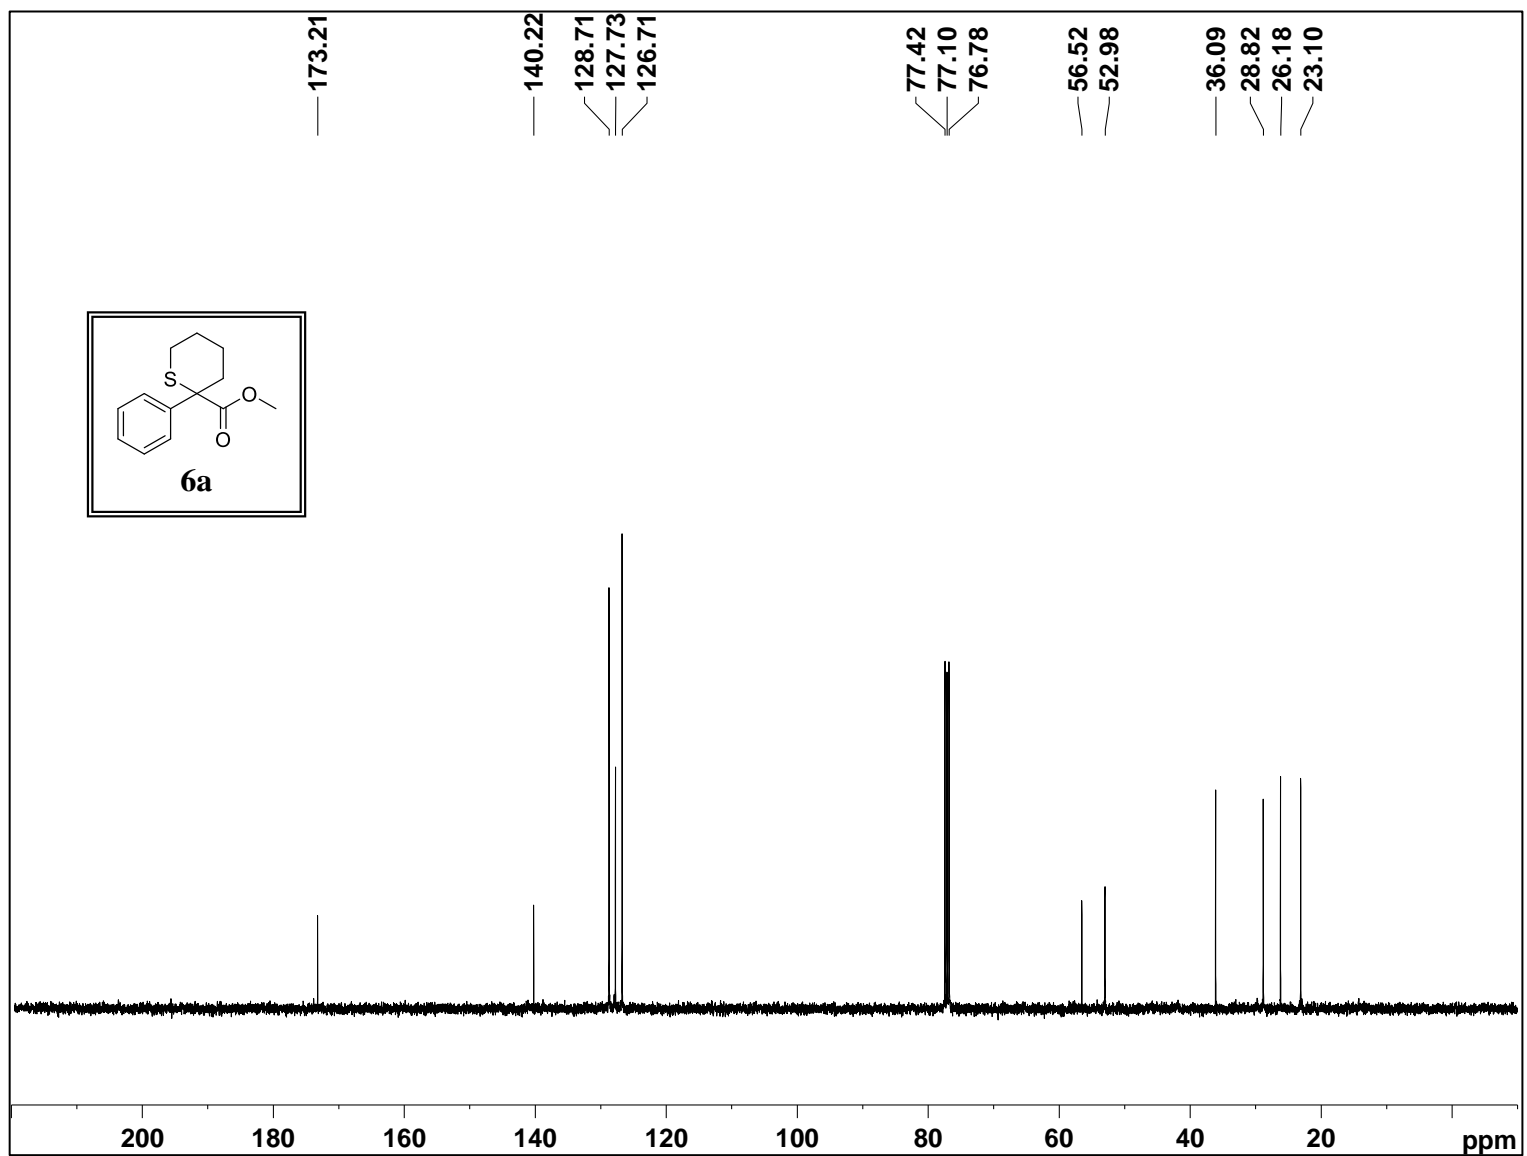

<sup>1</sup>H NMR for compound **6b** (400 MHz, CDCl<sub>3</sub>) (data)

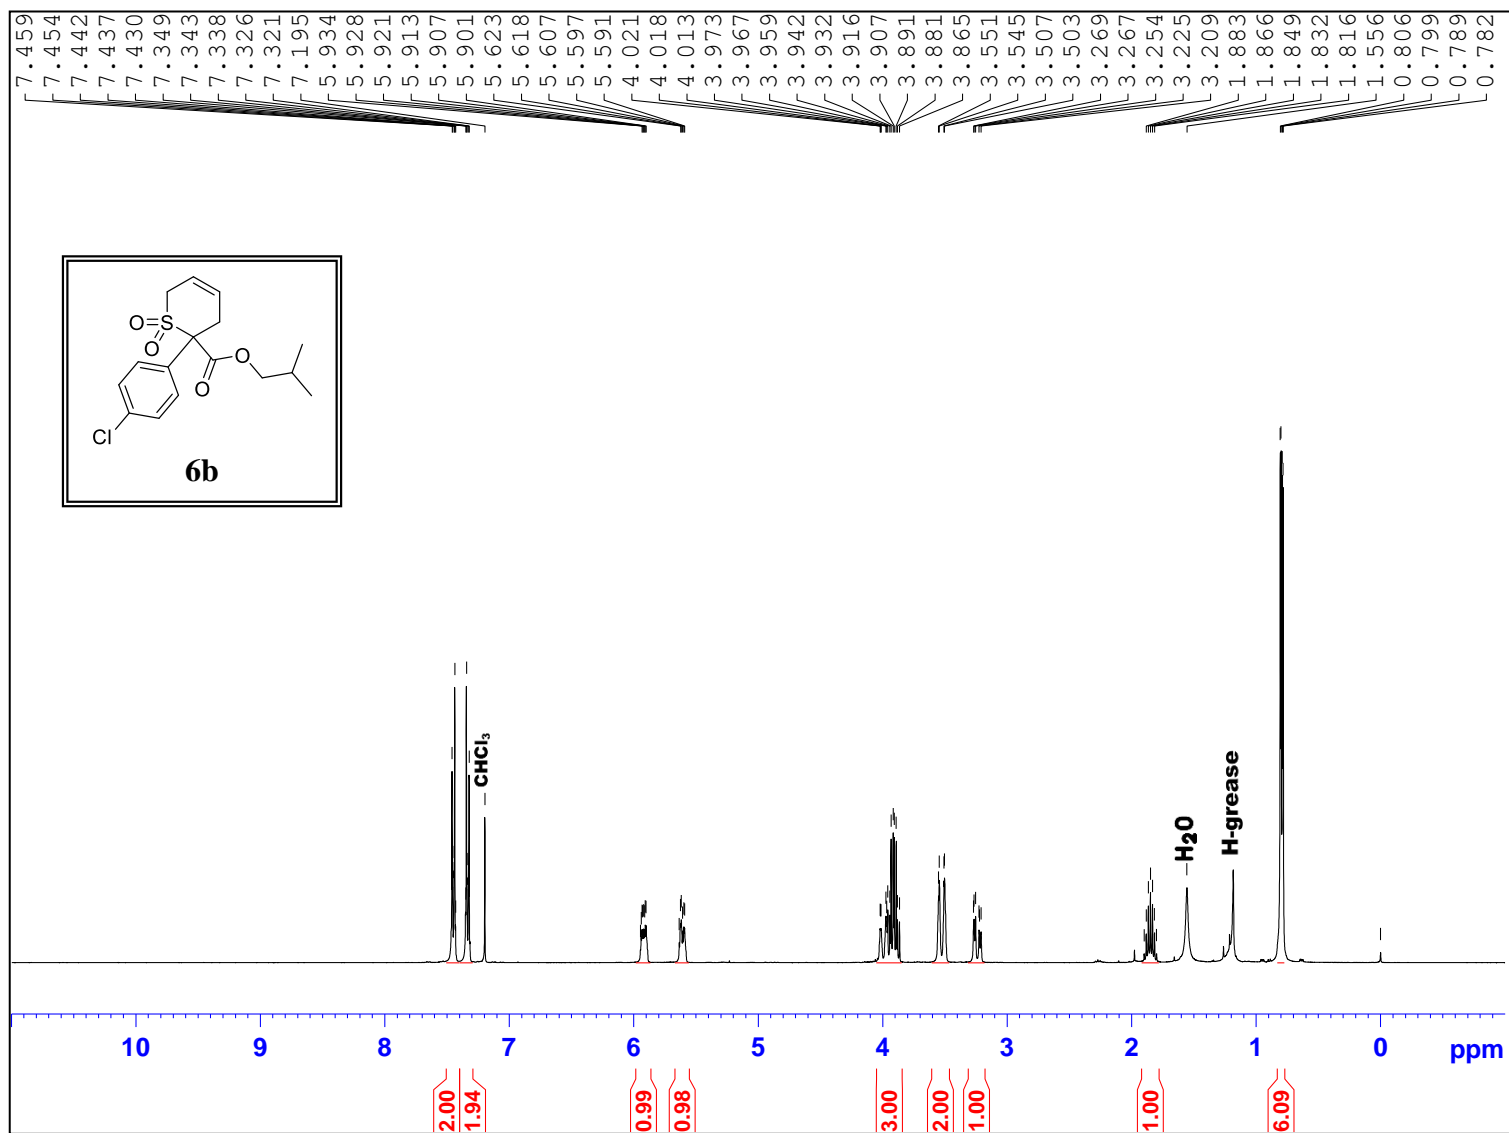

$^{13}\text{C}\{^1\text{H}\}$  NMR for compound **6b** (101 MHz,  $\text{CDCl}_3$ )

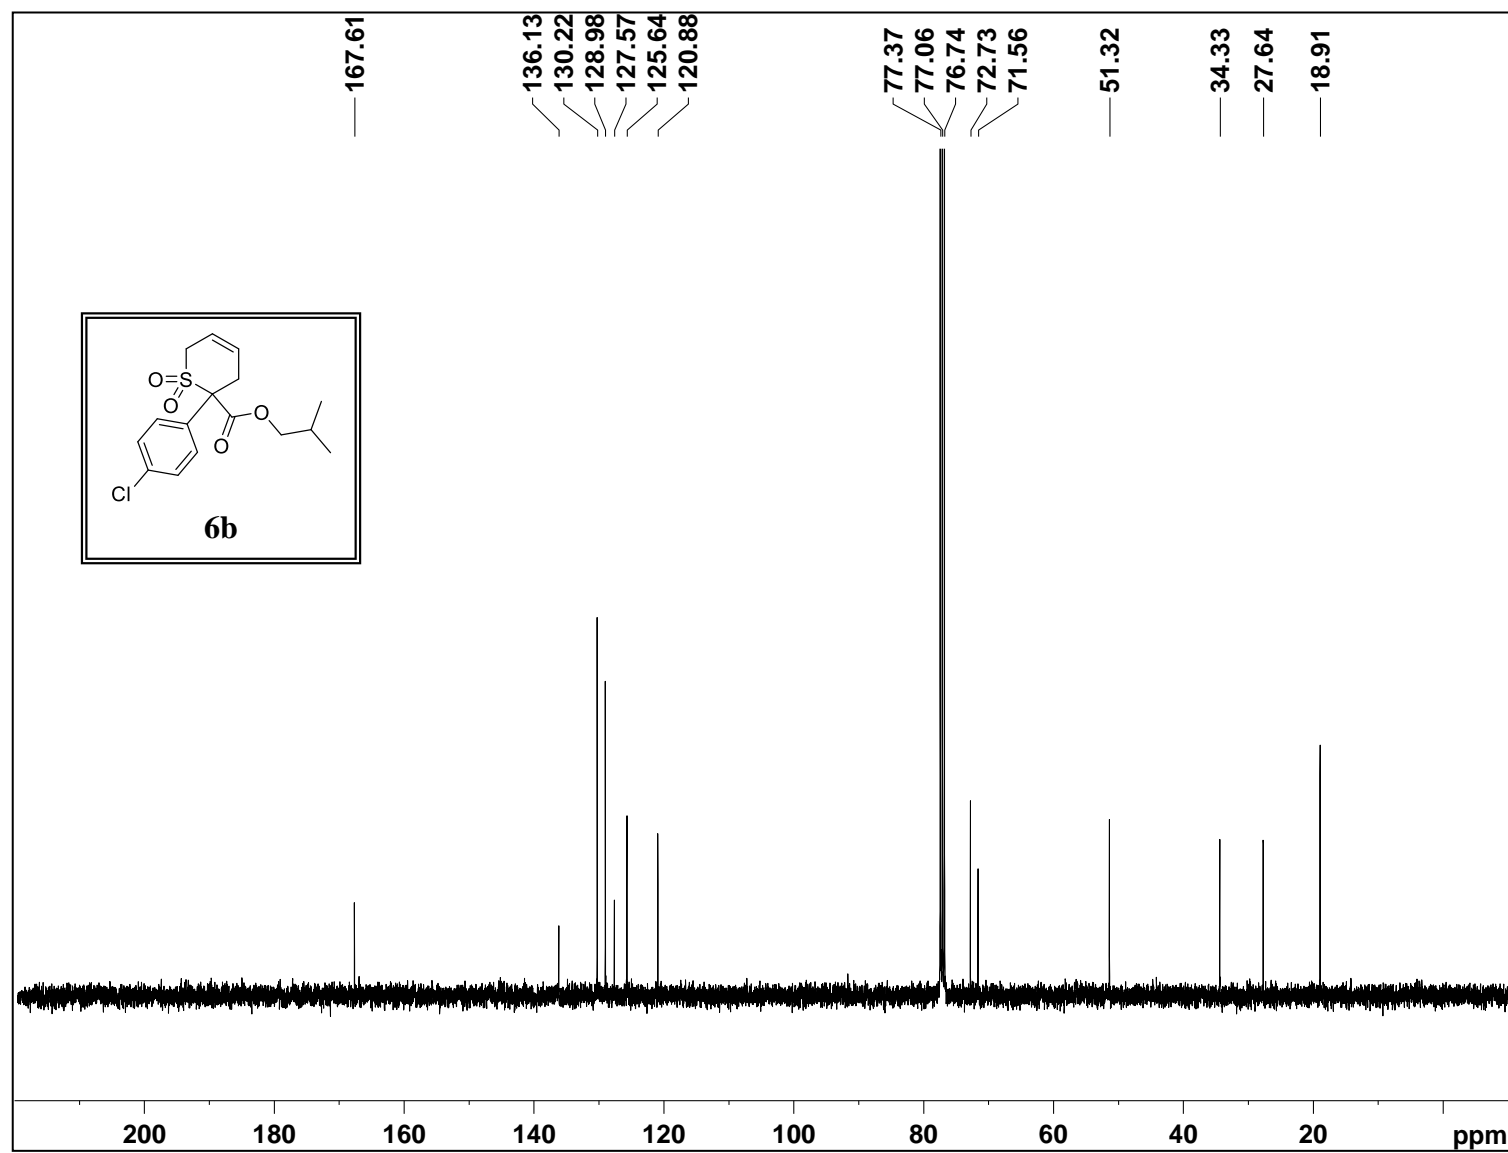



$^{13}\text{C}\{^1\text{H}\}$  DEPT-135 NMR for compound **6b** (101 MHz,  $\text{CDCl}_3$ )

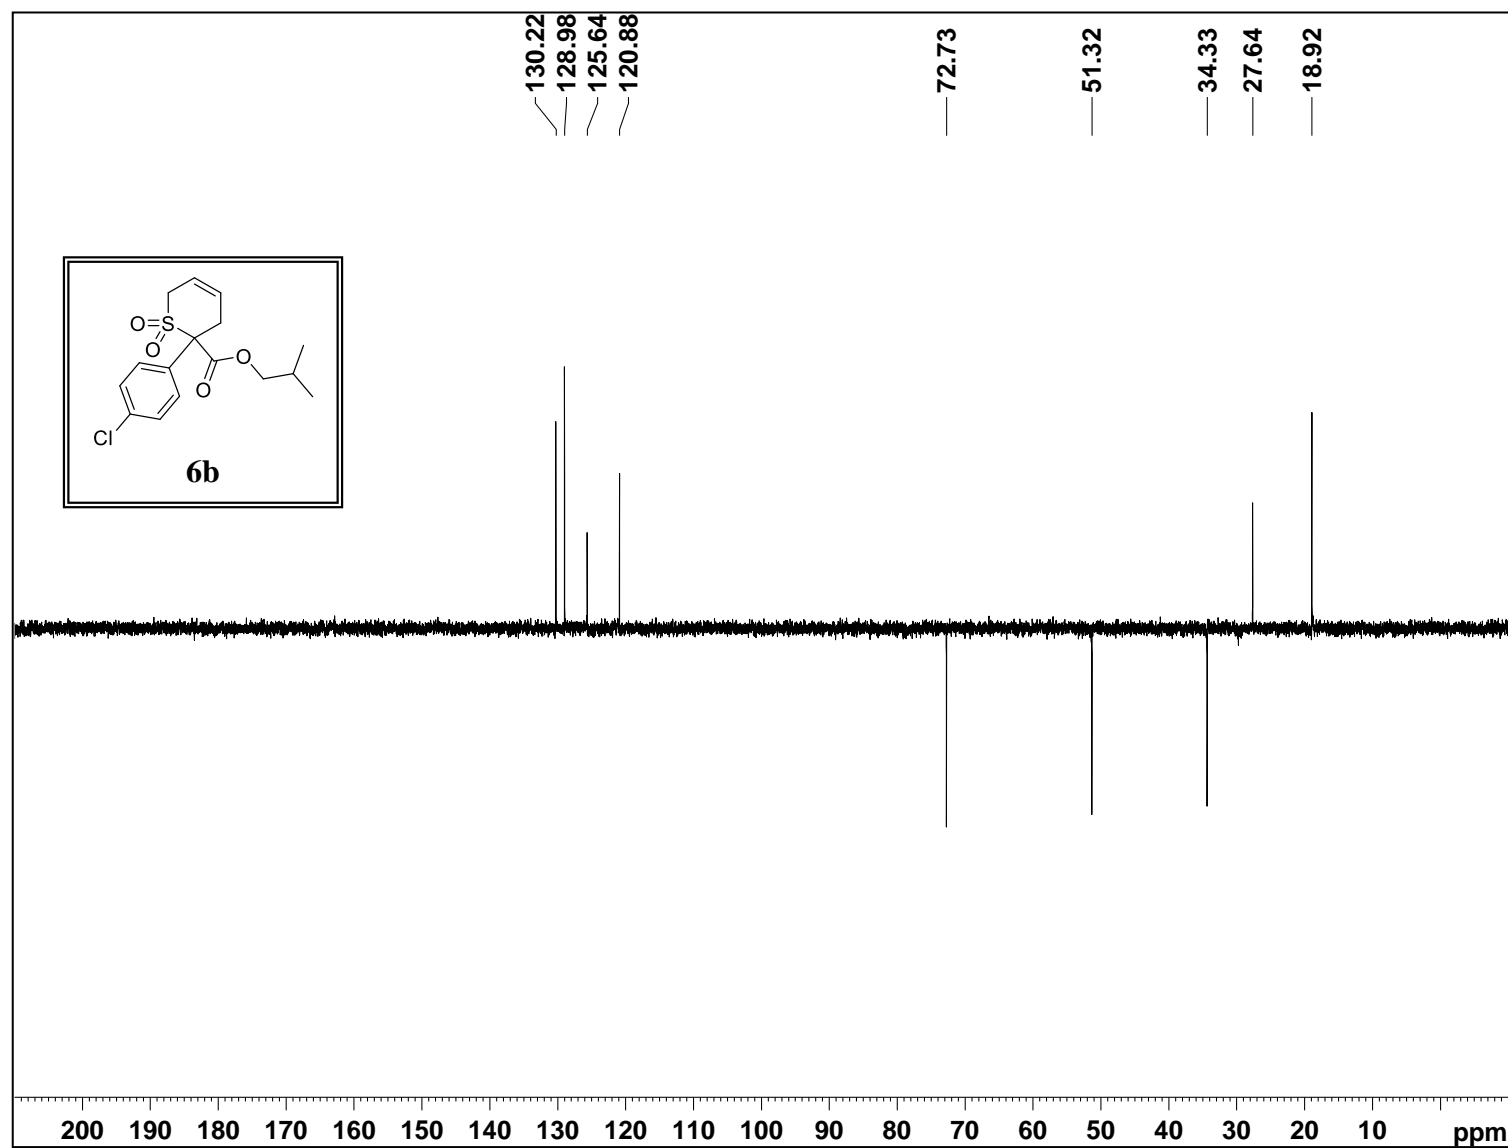

Supplement: d4nj01668h1.pdf [file d4nj01668h1.pdf]
